# Supplementary material
Source: Research Square preprint supplement (doi:10.21203/rs.3.rs-9380607/v1)
Supplement: Supplementary file 2 [file fe676f5fa5fd51649a6ec73c.xlsx]

## Sheet:  Table S1
ASV Taxonomy Table
Domain	Kingdom	Phylum	Class	Order	Family	Genus	Species	ASV	Total	Percent	Prevalence
d__Bacteria	k__norank_d__Bacteria	p__Abditibacteriota	c__Abditibacteria	o__Abditibacteriales	f__Abditibacteriaceae	g__Abditibacterium	s__metagenome_g__Abditibacterium	ASV3090	29	2.0E-5	0.15625
d__Bacteria	k__norank_d__Bacteria	p__Abditibacteriota	c__Abditibacteria	o__Abditibacteriales	f__Abditibacteriaceae	g__Abditibacterium	s__metagenome_g__Abditibacterium	ASV3257	25	2.0E-5	0.09375
d__Bacteria	k__norank_d__Bacteria	p__Abditibacteriota	c__Abditibacteria	o__Abditibacteriales	f__Abditibacteriaceae	g__Abditibacterium	s__metagenome_g__Abditibacterium	ASV32591	3	2.45445e-6	0.03125
d__Bacteria	k__norank_d__Bacteria	p__Abditibacteriota	c__Abditibacteria	o__Abditibacteriales	f__Abditibacteriaceae	g__Abditibacterium	s__unclassified_g__Abditibacterium	ASV5590	105	9.0E-5	0.3125
d__Bacteria	k__norank_d__Bacteria	p__Abditibacteriota	c__Abditibacteria	o__Abditibacteriales	f__Abditibacteriaceae	g__Abditibacterium	s__unclassified_g__Abditibacterium	ASV632	8	6.54519e-6	0.03125
d__Bacteria	k__norank_d__Bacteria	p__Abditibacteriota	c__Abditibacteria	o__Abditibacteriales	f__Abditibacteriaceae	g__Abditibacterium	s__unclassified_g__Abditibacterium	ASV7211	11	8.99963e-6	0.09375
d__Bacteria	k__norank_d__Bacteria	p__Abditibacteriota	c__Abditibacteria	o__Abditibacteriales	f__Abditibacteriaceae	g__Abditibacterium	s__unclassified_g__Abditibacterium	ASV7231	5	4.09074e-6	0.03125
d__Bacteria	k__norank_d__Bacteria	p__Abditibacteriota	c__Abditibacteria	o__Abditibacteriales	f__Abditibacteriaceae	g__Abditibacterium	s__uncultured_bacterium_g__Abditibacterium	ASV27082	2	1.6363e-6	0.03125
d__Bacteria	k__norank_d__Bacteria	p__Abditibacteriota	c__Abditibacteria	o__Abditibacteriales	f__Abditibacteriaceae	g__Abditibacterium	s__uncultured_bacterium_g__Abditibacterium	ASV628	14	1.0E-5	0.0625
d__Bacteria	k__norank_d__Bacteria	p__Abditibacteriota	c__Abditibacteria	o__Abditibacteriales	f__Abditibacteriaceae	g__Abditibacterium	s__uncultured_bacterium_g__Abditibacterium	ASV6344	3	2.45445e-6	0.03125
d__Bacteria	k__norank_d__Bacteria	p__Acidobacteriota	c__Acidobacteriae	o__Acidobacteriales	f__Acidobacteriaceae_Subgroup_1	g__Acidipila	s__unclassified_g__Acidipila	ASV29802	3	2.45445e-6	0.03125
d__Bacteria	k__norank_d__Bacteria	p__Acidobacteriota	c__Acidobacteriae	o__Acidobacteriales	f__Acidobacteriaceae_Subgroup_1	g__Acidipila	s__unclassified_g__Acidipila	ASV891	3	2.45445e-6	0.03125
d__Bacteria	k__norank_d__Bacteria	p__Acidobacteriota	c__Acidobacteriae	o__Acidobacteriales	f__Acidobacteriaceae_Subgroup_1	g__Edaphobacter	s__unclassified_g__Edaphobacter	ASV21333	10	8.18148e-6	0.03125
d__Bacteria	k__norank_d__Bacteria	p__Acidobacteriota	c__Acidobacteriae	o__Acidobacteriales	f__Acidobacteriaceae_Subgroup_1	g__Granulicella	s__unclassified_g__Granulicella	ASV26260	2	1.6363e-6	0.03125
d__Bacteria	k__norank_d__Bacteria	p__Acidobacteriota	c__Acidobacteriae	o__Acidobacteriales	f__Acidobacteriaceae_Subgroup_1	g__Occallatibacter	s__unclassified_g__Occallatibacter	ASV22565	3	2.45445e-6	0.03125
d__Bacteria	k__norank_d__Bacteria	p__Acidobacteriota	c__Acidobacteriae	o__Acidobacteriales	f__Acidobacteriaceae_Subgroup_1	g__Occallatibacter	s__unclassified_g__Occallatibacter	ASV29916	2	1.6363e-6	0.03125
d__Bacteria	k__norank_d__Bacteria	p__Acidobacteriota	c__Acidobacteriae	o__Acidobacteriales	f__Acidobacteriaceae_Subgroup_1	g__norank_f__Acidobacteriaceae_Subgroup_1	s__unclassified_g__norank_f__Acidobacteriaceae_Subgroup_1	ASV29839	1	8.18148e-7	0.03125
d__Bacteria	k__norank_d__Bacteria	p__Acidobacteriota	c__Acidobacteriae	o__Acidobacteriales	f__Acidobacteriaceae_Subgroup_1	g__norank_f__Acidobacteriaceae_Subgroup_1	s__unclassified_g__norank_f__Acidobacteriaceae_Subgroup_1	ASV983	9	7.36334e-6	0.09375
d__Bacteria	k__norank_d__Bacteria	p__Acidobacteriota	c__Acidobacteriae	o__Acidobacteriales	f__Acidobacteriaceae_Subgroup_1	g__norank_f__Acidobacteriaceae_Subgroup_1	s__uncultured_bacterium_f__Acidobacteriaceae_Subgroup_1	ASV6406	2	1.6363e-6	0.03125
d__Bacteria	k__norank_d__Bacteria	p__Acidobacteriota	c__Acidobacteriae	o__Acidobacteriales	f__Acidobacteriaceae_Subgroup_1	g__unclassified_f__Acidobacteriaceae_Subgroup_1	s__unclassified_f__Acidobacteriaceae_Subgroup_1	ASV26668	7	5.72704e-6	0.03125
d__Bacteria	k__norank_d__Bacteria	p__Acidobacteriota	c__Acidobacteriae	o__Acidobacteriales	f__Koribacteraceae	g__Candidatus_Koribacter	s__unclassified_g__Candidatus_Koribacter	ASV20763	5	4.09074e-6	0.03125
d__Bacteria	k__norank_d__Bacteria	p__Acidobacteriota	c__Acidobacteriae	o__Acidobacteriales	f__Koribacteraceae	g__Candidatus_Koribacter	s__unclassified_g__Candidatus_Koribacter	ASV29789	4	3.27259e-6	0.03125
d__Bacteria	k__norank_d__Bacteria	p__Acidobacteriota	c__Acidobacteriae	o__Acidobacteriales	f__Koribacteraceae	g__Candidatus_Koribacter	s__uncultured_Acidobacteriaceae_bacterium_g__Candidatus_Koribacter	ASV26713	3	2.45445e-6	0.03125
d__Bacteria	k__norank_d__Bacteria	p__Acidobacteriota	c__Acidobacteriae	o__Acidobacteriales	f__norank_o__Acidobacteriales	g__norank_o__Acidobacteriales	s__unclassified_g__norank_o__Acidobacteriales	ASV1753	26	2.0E-5	0.03125
d__Bacteria	k__norank_d__Bacteria	p__Acidobacteriota	c__Acidobacteriae	o__Acidobacteriales	f__norank_o__Acidobacteriales	g__norank_o__Acidobacteriales	s__unclassified_g__norank_o__Acidobacteriales	ASV1984	199	0.00016	0.375
d__Bacteria	k__norank_d__Bacteria	p__Acidobacteriota	c__Acidobacteriae	o__Acidobacteriales	f__norank_o__Acidobacteriales	g__norank_o__Acidobacteriales	s__unclassified_g__norank_o__Acidobacteriales	ASV20680	10	8.18148e-6	0.03125
d__Bacteria	k__norank_d__Bacteria	p__Acidobacteriota	c__Acidobacteriae	o__Acidobacteriales	f__norank_o__Acidobacteriales	g__norank_o__Acidobacteriales	s__unclassified_g__norank_o__Acidobacteriales	ASV21503	4	3.27259e-6	0.03125
d__Bacteria	k__norank_d__Bacteria	p__Acidobacteriota	c__Acidobacteriae	o__Acidobacteriales	f__norank_o__Acidobacteriales	g__norank_o__Acidobacteriales	s__unclassified_g__norank_o__Acidobacteriales	ASV21884	2	1.6363e-6	0.03125
d__Bacteria	k__norank_d__Bacteria	p__Acidobacteriota	c__Acidobacteriae	o__Acidobacteriales	f__norank_o__Acidobacteriales	g__norank_o__Acidobacteriales	s__unclassified_g__norank_o__Acidobacteriales	ASV22422	5	4.09074e-6	0.03125
d__Bacteria	k__norank_d__Bacteria	p__Acidobacteriota	c__Acidobacteriae	o__Acidobacteriales	f__norank_o__Acidobacteriales	g__norank_o__Acidobacteriales	s__unclassified_g__norank_o__Acidobacteriales	ASV22625	4	3.27259e-6	0.03125
d__Bacteria	k__norank_d__Bacteria	p__Acidobacteriota	c__Acidobacteriae	o__Acidobacteriales	f__norank_o__Acidobacteriales	g__norank_o__Acidobacteriales	s__unclassified_g__norank_o__Acidobacteriales	ASV23307	7	5.72704e-6	0.03125
d__Bacteria	k__norank_d__Bacteria	p__Acidobacteriota	c__Acidobacteriae	o__Acidobacteriales	f__norank_o__Acidobacteriales	g__norank_o__Acidobacteriales	s__unclassified_g__norank_o__Acidobacteriales	ASV26841	3	2.45445e-6	0.03125
d__Bacteria	k__norank_d__Bacteria	p__Acidobacteriota	c__Acidobacteriae	o__Acidobacteriales	f__norank_o__Acidobacteriales	g__norank_o__Acidobacteriales	s__unclassified_g__norank_o__Acidobacteriales	ASV27172	2	1.6363e-6	0.03125
d__Bacteria	k__norank_d__Bacteria	p__Acidobacteriota	c__Acidobacteriae	o__Acidobacteriales	f__norank_o__Acidobacteriales	g__norank_o__Acidobacteriales	s__unclassified_g__norank_o__Acidobacteriales	ASV3023	78	6.0E-5	0.15625
d__Bacteria	k__norank_d__Bacteria	p__Acidobacteriota	c__Acidobacteriae	o__Acidobacteriales	f__norank_o__Acidobacteriales	g__norank_o__Acidobacteriales	s__unclassified_g__norank_o__Acidobacteriales	ASV347	91	7.0E-5	0.21875
d__Bacteria	k__norank_d__Bacteria	p__Acidobacteriota	c__Acidobacteriae	o__Acidobacteriales	f__norank_o__Acidobacteriales	g__norank_o__Acidobacteriales	s__unclassified_g__norank_o__Acidobacteriales	ASV4632	6	4.90889e-6	0.03125
d__Bacteria	k__norank_d__Bacteria	p__Acidobacteriota	c__Acidobacteriae	o__Acidobacteriales	f__norank_o__Acidobacteriales	g__norank_o__Acidobacteriales	s__unclassified_g__norank_o__Acidobacteriales	ASV4806	2	1.6363e-6	0.03125
d__Bacteria	k__norank_d__Bacteria	p__Acidobacteriota	c__Acidobacteriae	o__Acidobacteriales	f__norank_o__Acidobacteriales	g__norank_o__Acidobacteriales	s__unclassified_g__norank_o__Acidobacteriales	ASV4843	6	4.90889e-6	0.0625
d__Bacteria	k__norank_d__Bacteria	p__Acidobacteriota	c__Acidobacteriae	o__Acidobacteriales	f__norank_o__Acidobacteriales	g__norank_o__Acidobacteriales	s__unclassified_g__norank_o__Acidobacteriales	ASV6275	2	1.6363e-6	0.03125
d__Bacteria	k__norank_d__Bacteria	p__Acidobacteriota	c__Acidobacteriae	o__Acidobacteriales	f__norank_o__Acidobacteriales	g__norank_o__Acidobacteriales	s__unclassified_g__norank_o__Acidobacteriales	ASV672	23	2.0E-5	0.125
d__Bacteria	k__norank_d__Bacteria	p__Acidobacteriota	c__Acidobacteriae	o__Acidobacteriales	f__norank_o__Acidobacteriales	g__norank_o__Acidobacteriales	s__uncultured_Acidobacteriaceae_bacterium_o__Acidobacteriales	ASV8127	4	3.27259e-6	0.03125
d__Bacteria	k__norank_d__Bacteria	p__Acidobacteriota	c__Acidobacteriae	o__Acidobacteriales	f__unclassified_o__Acidobacteriales	g__unclassified_o__Acidobacteriales	s__unclassified_o__Acidobacteriales	ASV29903	1	8.18148e-7	0.03125
d__Bacteria	k__norank_d__Bacteria	p__Acidobacteriota	c__Acidobacteriae	o__Acidobacteriales	f__unclassified_o__Acidobacteriales	g__unclassified_o__Acidobacteriales	s__unclassified_o__Acidobacteriales	ASV29932	2	1.6363e-6	0.03125
d__Bacteria	k__norank_d__Bacteria	p__Acidobacteriota	c__Acidobacteriae	o__Acidobacteriales	f__unclassified_o__Acidobacteriales	g__unclassified_o__Acidobacteriales	s__unclassified_o__Acidobacteriales	ASV8869	2	1.6363e-6	0.03125
d__Bacteria	k__norank_d__Bacteria	p__Acidobacteriota	c__Acidobacteriae	o__Acidobacteriales	f__unclassified_o__Acidobacteriales	g__unclassified_o__Acidobacteriales	s__unclassified_o__Acidobacteriales	ASV9222	5	4.09074e-6	0.03125
d__Bacteria	k__norank_d__Bacteria	p__Acidobacteriota	c__Acidobacteriae	o__Bryobacterales	f__Bryobacteraceae	g__Bryobacter	s__Acidobacteria_bacterium_WX72	ASV6349	3	2.45445e-6	0.03125
d__Bacteria	k__norank_d__Bacteria	p__Acidobacteriota	c__Acidobacteriae	o__Bryobacterales	f__Bryobacteraceae	g__Bryobacter	s__unclassified_g__Bryobacter	ASV1991	16	1.0E-5	0.0625
d__Bacteria	k__norank_d__Bacteria	p__Acidobacteriota	c__Acidobacteriae	o__Bryobacterales	f__Bryobacteraceae	g__Bryobacter	s__unclassified_g__Bryobacter	ASV20590	23	2.0E-5	0.03125
d__Bacteria	k__norank_d__Bacteria	p__Acidobacteriota	c__Acidobacteriae	o__Bryobacterales	f__Bryobacteraceae	g__Bryobacter	s__unclassified_g__Bryobacter	ASV21249	17	1.0E-5	0.03125
d__Bacteria	k__norank_d__Bacteria	p__Acidobacteriota	c__Acidobacteriae	o__Bryobacterales	f__Bryobacteraceae	g__Bryobacter	s__unclassified_g__Bryobacter	ASV21430	7	5.72704e-6	0.03125
d__Bacteria	k__norank_d__Bacteria	p__Acidobacteriota	c__Acidobacteriae	o__Bryobacterales	f__Bryobacteraceae	g__Bryobacter	s__unclassified_g__Bryobacter	ASV21482	5	4.09074e-6	0.03125
d__Bacteria	k__norank_d__Bacteria	p__Acidobacteriota	c__Acidobacteriae	o__Bryobacterales	f__Bryobacteraceae	g__Bryobacter	s__unclassified_g__Bryobacter	ASV21523	4	3.27259e-6	0.03125
d__Bacteria	k__norank_d__Bacteria	p__Acidobacteriota	c__Acidobacteriae	o__Bryobacterales	f__Bryobacteraceae	g__Bryobacter	s__unclassified_g__Bryobacter	ASV21590	3	2.45445e-6	0.03125
d__Bacteria	k__norank_d__Bacteria	p__Acidobacteriota	c__Acidobacteriae	o__Bryobacterales	f__Bryobacteraceae	g__Bryobacter	s__unclassified_g__Bryobacter	ASV22479	6	4.90889e-6	0.03125
d__Bacteria	k__norank_d__Bacteria	p__Acidobacteriota	c__Acidobacteriae	o__Bryobacterales	f__Bryobacteraceae	g__Bryobacter	s__unclassified_g__Bryobacter	ASV22526	2	1.6363e-6	0.03125
d__Bacteria	k__norank_d__Bacteria	p__Acidobacteriota	c__Acidobacteriae	o__Bryobacterales	f__Bryobacteraceae	g__Bryobacter	s__unclassified_g__Bryobacter	ASV22559	2	1.6363e-6	0.03125
d__Bacteria	k__norank_d__Bacteria	p__Acidobacteriota	c__Acidobacteriae	o__Bryobacterales	f__Bryobacteraceae	g__Bryobacter	s__unclassified_g__Bryobacter	ASV22563	3	2.45445e-6	0.03125
d__Bacteria	k__norank_d__Bacteria	p__Acidobacteriota	c__Acidobacteriae	o__Bryobacterales	f__Bryobacteraceae	g__Bryobacter	s__unclassified_g__Bryobacter	ASV22667	2	1.6363e-6	0.03125
d__Bacteria	k__norank_d__Bacteria	p__Acidobacteriota	c__Acidobacteriae	o__Bryobacterales	f__Bryobacteraceae	g__Bryobacter	s__unclassified_g__Bryobacter	ASV22816	2	1.6363e-6	0.03125
d__Bacteria	k__norank_d__Bacteria	p__Acidobacteriota	c__Acidobacteriae	o__Bryobacterales	f__Bryobacteraceae	g__Bryobacter	s__unclassified_g__Bryobacter	ASV26186	7	5.72704e-6	0.0625
d__Bacteria	k__norank_d__Bacteria	p__Acidobacteriota	c__Acidobacteriae	o__Bryobacterales	f__Bryobacteraceae	g__Bryobacter	s__unclassified_g__Bryobacter	ASV26208	2	1.6363e-6	0.03125
d__Bacteria	k__norank_d__Bacteria	p__Acidobacteriota	c__Acidobacteriae	o__Bryobacterales	f__Bryobacteraceae	g__Bryobacter	s__unclassified_g__Bryobacter	ASV26592	6	4.90889e-6	0.03125
d__Bacteria	k__norank_d__Bacteria	p__Acidobacteriota	c__Acidobacteriae	o__Bryobacterales	f__Bryobacteraceae	g__Bryobacter	s__unclassified_g__Bryobacter	ASV26606	8	6.54519e-6	0.03125
d__Bacteria	k__norank_d__Bacteria	p__Acidobacteriota	c__Acidobacteriae	o__Bryobacterales	f__Bryobacteraceae	g__Bryobacter	s__unclassified_g__Bryobacter	ASV26707	3	2.45445e-6	0.03125
d__Bacteria	k__norank_d__Bacteria	p__Acidobacteriota	c__Acidobacteriae	o__Bryobacterales	f__Bryobacteraceae	g__Bryobacter	s__unclassified_g__Bryobacter	ASV26719	5	4.09074e-6	0.03125
d__Bacteria	k__norank_d__Bacteria	p__Acidobacteriota	c__Acidobacteriae	o__Bryobacterales	f__Bryobacteraceae	g__Bryobacter	s__unclassified_g__Bryobacter	ASV29498	9	7.36334e-6	0.03125
d__Bacteria	k__norank_d__Bacteria	p__Acidobacteriota	c__Acidobacteriae	o__Bryobacterales	f__Bryobacteraceae	g__Bryobacter	s__unclassified_g__Bryobacter	ASV29576	5	4.09074e-6	0.03125
d__Bacteria	k__norank_d__Bacteria	p__Acidobacteriota	c__Acidobacteriae	o__Bryobacterales	f__Bryobacteraceae	g__Bryobacter	s__unclassified_g__Bryobacter	ASV29795	2	1.6363e-6	0.03125
d__Bacteria	k__norank_d__Bacteria	p__Acidobacteriota	c__Acidobacteriae	o__Bryobacterales	f__Bryobacteraceae	g__Bryobacter	s__unclassified_g__Bryobacter	ASV29926	2	1.6363e-6	0.03125
d__Bacteria	k__norank_d__Bacteria	p__Acidobacteriota	c__Acidobacteriae	o__Bryobacterales	f__Bryobacteraceae	g__Bryobacter	s__unclassified_g__Bryobacter	ASV4446	36	3.0E-5	0.15625
d__Bacteria	k__norank_d__Bacteria	p__Acidobacteriota	c__Acidobacteriae	o__Bryobacterales	f__Bryobacteraceae	g__Bryobacter	s__unclassified_g__Bryobacter	ASV4537	14	1.0E-5	0.0625
d__Bacteria	k__norank_d__Bacteria	p__Acidobacteriota	c__Acidobacteriae	o__Bryobacterales	f__Bryobacteraceae	g__Bryobacter	s__unclassified_g__Bryobacter	ASV4599	5	4.09074e-6	0.03125
d__Bacteria	k__norank_d__Bacteria	p__Acidobacteriota	c__Acidobacteriae	o__Bryobacterales	f__Bryobacteraceae	g__Bryobacter	s__unclassified_g__Bryobacter	ASV808	4	3.27259e-6	0.03125
d__Bacteria	k__norank_d__Bacteria	p__Acidobacteriota	c__Acidobacteriae	o__Bryobacterales	f__Bryobacteraceae	g__Bryobacter	s__unclassified_g__Bryobacter	ASV939	4	3.27259e-6	0.03125
d__Bacteria	k__norank_d__Bacteria	p__Acidobacteriota	c__Acidobacteriae	o__Bryobacterales	f__Bryobacteraceae	g__Bryobacter	s__uncultured_Acidobacterium_sp._g__Bryobacter	ASV23280	9	7.36334e-6	0.03125
d__Bacteria	k__norank_d__Bacteria	p__Acidobacteriota	c__Acidobacteriae	o__Bryobacterales	f__Bryobacteraceae	g__Bryobacter	s__uncultured_Acidobacterium_sp._g__Bryobacter	ASV953	3	2.45445e-6	0.03125
d__Bacteria	k__norank_d__Bacteria	p__Acidobacteriota	c__Acidobacteriae	o__Bryobacterales	f__Bryobacteraceae	g__Bryobacter	s__uncultured_Solibacteraceae_bacterium_g__Bryobacter	ASV21581	2	1.6363e-6	0.03125
d__Bacteria	k__norank_d__Bacteria	p__Acidobacteriota	c__Acidobacteriae	o__Bryobacterales	f__Bryobacteraceae	g__Bryobacter	s__uncultured_bacterium_g__Bryobacter	ASV1238	28	2.0E-5	0.15625
d__Bacteria	k__norank_d__Bacteria	p__Acidobacteriota	c__Acidobacteriae	o__Bryobacterales	f__Bryobacteraceae	g__Bryobacter	s__uncultured_bacterium_g__Bryobacter	ASV23426	1	8.18148e-7	0.03125
d__Bacteria	k__norank_d__Bacteria	p__Acidobacteriota	c__Acidobacteriae	o__Bryobacterales	f__Bryobacteraceae	g__Bryobacter	s__uncultured_bacterium_g__Bryobacter	ASV26804	3	2.45445e-6	0.03125
d__Bacteria	k__norank_d__Bacteria	p__Acidobacteriota	c__Acidobacteriae	o__Elev-16S-1166	f__norank_o__Elev-16S-1166	g__norank_o__Elev-16S-1166	s__unclassified_g__norank_o__Elev-16S-1166	ASV26667	6	4.90889e-6	0.03125
d__Bacteria	k__norank_d__Bacteria	p__Acidobacteriota	c__Acidobacteriae	o__Solibacterales	f__Solibacteraceae	g__Candidatus_Solibacter	s__unclassified_g__Candidatus_Solibacter	ASV1105	2	1.6363e-6	0.03125
d__Bacteria	k__norank_d__Bacteria	p__Acidobacteriota	c__Acidobacteriae	o__Solibacterales	f__Solibacteraceae	g__Candidatus_Solibacter	s__unclassified_g__Candidatus_Solibacter	ASV1719	6	4.90889e-6	0.03125
d__Bacteria	k__norank_d__Bacteria	p__Acidobacteriota	c__Acidobacteriae	o__Solibacterales	f__Solibacteraceae	g__Candidatus_Solibacter	s__unclassified_g__Candidatus_Solibacter	ASV20621	13	1.0E-5	0.03125
d__Bacteria	k__norank_d__Bacteria	p__Acidobacteriota	c__Acidobacteriae	o__Solibacterales	f__Solibacteraceae	g__Candidatus_Solibacter	s__unclassified_g__Candidatus_Solibacter	ASV21585	3	2.45445e-6	0.03125
d__Bacteria	k__norank_d__Bacteria	p__Acidobacteriota	c__Acidobacteriae	o__Solibacterales	f__Solibacteraceae	g__Candidatus_Solibacter	s__unclassified_g__Candidatus_Solibacter	ASV22271	10	8.18148e-6	0.03125
d__Bacteria	k__norank_d__Bacteria	p__Acidobacteriota	c__Acidobacteriae	o__Solibacterales	f__Solibacteraceae	g__Candidatus_Solibacter	s__unclassified_g__Candidatus_Solibacter	ASV22377	7	5.72704e-6	0.03125
d__Bacteria	k__norank_d__Bacteria	p__Acidobacteriota	c__Acidobacteriae	o__Solibacterales	f__Solibacteraceae	g__Candidatus_Solibacter	s__unclassified_g__Candidatus_Solibacter	ASV26534	8	6.54519e-6	0.03125
d__Bacteria	k__norank_d__Bacteria	p__Acidobacteriota	c__Acidobacteriae	o__Solibacterales	f__Solibacteraceae	g__Candidatus_Solibacter	s__unclassified_g__Candidatus_Solibacter	ASV27071	1	8.18148e-7	0.03125
d__Bacteria	k__norank_d__Bacteria	p__Acidobacteriota	c__Acidobacteriae	o__Solibacterales	f__Solibacteraceae	g__Candidatus_Solibacter	s__unclassified_g__Candidatus_Solibacter	ASV29740	2	1.6363e-6	0.03125
d__Bacteria	k__norank_d__Bacteria	p__Acidobacteriota	c__Acidobacteriae	o__Solibacterales	f__Solibacteraceae	g__Candidatus_Solibacter	s__unclassified_g__Candidatus_Solibacter	ASV3428	14	1.0E-5	0.0625
d__Bacteria	k__norank_d__Bacteria	p__Acidobacteriota	c__Acidobacteriae	o__Solibacterales	f__Solibacteraceae	g__Candidatus_Solibacter	s__unclassified_g__Candidatus_Solibacter	ASV4460	6	4.90889e-6	0.03125
d__Bacteria	k__norank_d__Bacteria	p__Acidobacteriota	c__Acidobacteriae	o__Solibacterales	f__Solibacteraceae	g__Candidatus_Solibacter	s__unclassified_g__Candidatus_Solibacter	ASV4708	3	2.45445e-6	0.03125
d__Bacteria	k__norank_d__Bacteria	p__Acidobacteriota	c__Acidobacteriae	o__Solibacterales	f__Solibacteraceae	g__Candidatus_Solibacter	s__unclassified_g__Candidatus_Solibacter	ASV813	5	4.09074e-6	0.03125
d__Bacteria	k__norank_d__Bacteria	p__Acidobacteriota	c__Acidobacteriae	o__Solibacterales	f__Solibacteraceae	g__Candidatus_Solibacter	s__unclassified_g__Candidatus_Solibacter	ASV8685	18	1.0E-5	0.09375
d__Bacteria	k__norank_d__Bacteria	p__Acidobacteriota	c__Acidobacteriae	o__Subgroup_13	f__norank_o__Subgroup_13	g__norank_o__Subgroup_13	s__uncultured_bacterium_o__Subgroup_13	ASV26248	3	2.45445e-6	0.03125
d__Bacteria	k__norank_d__Bacteria	p__Acidobacteriota	c__Acidobacteriae	o__Subgroup_2	f__norank_o__Subgroup_2	g__norank_o__Subgroup_2	s__uncultured_Acidobacteriales_bacterium_o__Subgroup_2	ASV26632	6	4.90889e-6	0.03125
d__Bacteria	k__norank_d__Bacteria	p__Acidobacteriota	c__Acidobacteriae	o__unclassified_c__Acidobacteriae	f__unclassified_c__Acidobacteriae	g__unclassified_c__Acidobacteriae	s__unclassified_c__Acidobacteriae	ASV2418	2	1.6363e-6	0.03125
d__Bacteria	k__norank_d__Bacteria	p__Acidobacteriota	c__Blastocatellia	o__11-24	f__norank_o__11-24	g__norank_o__11-24	s__unclassified_g__norank_o__11-24	ASV4871	2	1.6363e-6	0.03125
d__Bacteria	k__norank_d__Bacteria	p__Acidobacteriota	c__Blastocatellia	o__11-24	f__norank_o__11-24	g__norank_o__11-24	s__uncultured_bacterium_o__11-24	ASV1755	11	8.99963e-6	0.09375
d__Bacteria	k__norank_d__Bacteria	p__Acidobacteriota	c__Blastocatellia	o__11-24	f__norank_o__11-24	g__norank_o__11-24	s__uncultured_bacterium_o__11-24	ASV26551	7	5.72704e-6	0.03125
d__Bacteria	k__norank_d__Bacteria	p__Acidobacteriota	c__Blastocatellia	o__11-24	f__norank_o__11-24	g__norank_o__11-24	s__uncultured_bacterium_o__11-24	ASV668	31	3.0E-5	0.125
d__Bacteria	k__norank_d__Bacteria	p__Acidobacteriota	c__Blastocatellia	o__unclassified_c__Blastocatellia	f__unclassified_c__Blastocatellia	g__unclassified_c__Blastocatellia	s__unclassified_c__Blastocatellia	ASV4624	3	2.45445e-6	0.03125
d__Bacteria	k__norank_d__Bacteria	p__Acidobacteriota	c__Holophagae	o__Subgroup_7	f__norank_o__Subgroup_7	g__norank_o__Subgroup_7	s__unclassified_g__norank_o__Subgroup_7	ASV20295	3	2.45445e-6	0.03125
d__Bacteria	k__norank_d__Bacteria	p__Acidobacteriota	c__Holophagae	o__Subgroup_7	f__norank_o__Subgroup_7	g__norank_o__Subgroup_7	s__unclassified_g__norank_o__Subgroup_7	ASV25909	2	1.6363e-6	0.03125
d__Bacteria	k__norank_d__Bacteria	p__Acidobacteriota	c__Holophagae	o__Subgroup_7	f__norank_o__Subgroup_7	g__norank_o__Subgroup_7	s__unclassified_g__norank_o__Subgroup_7	ASV26480	12	9.81778e-6	0.03125
d__Bacteria	k__norank_d__Bacteria	p__Acidobacteriota	c__Holophagae	o__Subgroup_7	f__norank_o__Subgroup_7	g__norank_o__Subgroup_7	s__unclassified_g__norank_o__Subgroup_7	ASV26863	3	2.45445e-6	0.03125
d__Bacteria	k__norank_d__Bacteria	p__Acidobacteriota	c__Holophagae	o__Subgroup_7	f__norank_o__Subgroup_7	g__norank_o__Subgroup_7	s__unclassified_g__norank_o__Subgroup_7	ASV307	314	0.00026	0.53125
d__Bacteria	k__norank_d__Bacteria	p__Acidobacteriota	c__Holophagae	o__Subgroup_7	f__norank_o__Subgroup_7	g__norank_o__Subgroup_7	s__unclassified_g__norank_o__Subgroup_7	ASV4665	4	3.27259e-6	0.03125
d__Bacteria	k__norank_d__Bacteria	p__Acidobacteriota	c__Holophagae	o__Subgroup_7	f__norank_o__Subgroup_7	g__norank_o__Subgroup_7	s__unclassified_g__norank_o__Subgroup_7	ASV535	33	3.0E-5	0.125
d__Bacteria	k__norank_d__Bacteria	p__Acidobacteriota	c__Holophagae	o__Subgroup_7	f__norank_o__Subgroup_7	g__norank_o__Subgroup_7	s__unclassified_g__norank_o__Subgroup_7	ASV6059	6	4.90889e-6	0.03125
d__Bacteria	k__norank_d__Bacteria	p__Acidobacteriota	c__Subgroup_11	o__norank_c__Subgroup_11	f__norank_c__Subgroup_11	g__norank_c__Subgroup_11	s__unclassified_g__norank_c__Subgroup_11	ASV20643	11	8.99963e-6	0.03125
d__Bacteria	k__norank_d__Bacteria	p__Acidobacteriota	c__Subgroup_11	o__norank_c__Subgroup_11	f__norank_c__Subgroup_11	g__norank_c__Subgroup_11	s__unclassified_g__norank_c__Subgroup_11	ASV26642	5	4.09074e-6	0.03125
d__Bacteria	k__norank_d__Bacteria	p__Acidobacteriota	c__Subgroup_11	o__norank_c__Subgroup_11	f__norank_c__Subgroup_11	g__norank_c__Subgroup_11	s__unclassified_g__norank_c__Subgroup_11	ASV29784	3	2.45445e-6	0.03125
d__Bacteria	k__norank_d__Bacteria	p__Acidobacteriota	c__Subgroup_11	o__norank_c__Subgroup_11	f__norank_c__Subgroup_11	g__norank_c__Subgroup_11	s__uncultured_bacterium_c__Subgroup_11	ASV22711	3	2.45445e-6	0.03125
d__Bacteria	k__norank_d__Bacteria	p__Acidobacteriota	c__Subgroup_11	o__norank_c__Subgroup_11	f__norank_c__Subgroup_11	g__norank_c__Subgroup_11	s__uncultured_bacterium_c__Subgroup_11	ASV709	3	2.45445e-6	0.03125
d__Bacteria	k__norank_d__Bacteria	p__Acidobacteriota	c__Subgroup_5	o__norank_c__Subgroup_5	f__norank_c__Subgroup_5	g__norank_c__Subgroup_5	s__unclassified_g__norank_c__Subgroup_5	ASV1060	2	1.6363e-6	0.03125
d__Bacteria	k__norank_d__Bacteria	p__Acidobacteriota	c__Subgroup_5	o__norank_c__Subgroup_5	f__norank_c__Subgroup_5	g__norank_c__Subgroup_5	s__unclassified_g__norank_c__Subgroup_5	ASV1851	23	2.0E-5	0.03125
d__Bacteria	k__norank_d__Bacteria	p__Acidobacteriota	c__Subgroup_5	o__norank_c__Subgroup_5	f__norank_c__Subgroup_5	g__norank_c__Subgroup_5	s__unclassified_g__norank_c__Subgroup_5	ASV21435	5	4.09074e-6	0.03125
d__Bacteria	k__norank_d__Bacteria	p__Acidobacteriota	c__Subgroup_5	o__norank_c__Subgroup_5	f__norank_c__Subgroup_5	g__norank_c__Subgroup_5	s__unclassified_g__norank_c__Subgroup_5	ASV21630	3	2.45445e-6	0.03125
d__Bacteria	k__norank_d__Bacteria	p__Acidobacteriota	c__Subgroup_5	o__norank_c__Subgroup_5	f__norank_c__Subgroup_5	g__norank_c__Subgroup_5	s__unclassified_g__norank_c__Subgroup_5	ASV22336	5	4.09074e-6	0.03125
d__Bacteria	k__norank_d__Bacteria	p__Acidobacteriota	c__Subgroup_5	o__norank_c__Subgroup_5	f__norank_c__Subgroup_5	g__norank_c__Subgroup_5	s__unclassified_g__norank_c__Subgroup_5	ASV23383	20	2.0E-5	0.0625
d__Bacteria	k__norank_d__Bacteria	p__Acidobacteriota	c__Subgroup_5	o__norank_c__Subgroup_5	f__norank_c__Subgroup_5	g__norank_c__Subgroup_5	s__unclassified_g__norank_c__Subgroup_5	ASV29539	5	4.09074e-6	0.03125
d__Bacteria	k__norank_d__Bacteria	p__Acidobacteriota	c__Subgroup_5	o__norank_c__Subgroup_5	f__norank_c__Subgroup_5	g__norank_c__Subgroup_5	s__unclassified_g__norank_c__Subgroup_5	ASV4593	4	3.27259e-6	0.03125
d__Bacteria	k__norank_d__Bacteria	p__Acidobacteriota	c__Subgroup_5	o__norank_c__Subgroup_5	f__norank_c__Subgroup_5	g__norank_c__Subgroup_5	s__unclassified_g__norank_c__Subgroup_5	ASV4634	6	4.90889e-6	0.03125
d__Bacteria	k__norank_d__Bacteria	p__Acidobacteriota	c__Subgroup_5	o__norank_c__Subgroup_5	f__norank_c__Subgroup_5	g__norank_c__Subgroup_5	s__unclassified_g__norank_c__Subgroup_5	ASV642	23	2.0E-5	0.0625
d__Bacteria	k__norank_d__Bacteria	p__Acidobacteriota	c__Subgroup_5	o__norank_c__Subgroup_5	f__norank_c__Subgroup_5	g__norank_c__Subgroup_5	s__unclassified_g__norank_c__Subgroup_5	ASV682	42	3.0E-5	0.15625
d__Bacteria	k__norank_d__Bacteria	p__Acidobacteriota	c__Subgroup_5	o__norank_c__Subgroup_5	f__norank_c__Subgroup_5	g__norank_c__Subgroup_5	s__unclassified_g__norank_c__Subgroup_5	ASV752	5	4.09074e-6	0.03125
d__Bacteria	k__norank_d__Bacteria	p__Acidobacteriota	c__Subgroup_5	o__norank_c__Subgroup_5	f__norank_c__Subgroup_5	g__norank_c__Subgroup_5	s__unclassified_g__norank_c__Subgroup_5	ASV754	25	2.0E-5	0.09375
d__Bacteria	k__norank_d__Bacteria	p__Acidobacteriota	c__Subgroup_5	o__norank_c__Subgroup_5	f__norank_c__Subgroup_5	g__norank_c__Subgroup_5	s__unclassified_g__norank_c__Subgroup_5	ASV7896	28	2.0E-5	0.125
d__Bacteria	k__norank_d__Bacteria	p__Acidobacteriota	c__Subgroup_5	o__norank_c__Subgroup_5	f__norank_c__Subgroup_5	g__norank_c__Subgroup_5	s__uncultured_Acidobacteriales_bacterium_c__Subgroup_5	ASV730	17	1.0E-5	0.09375
d__Bacteria	k__norank_d__Bacteria	p__Acidobacteriota	c__Subgroup_5	o__norank_c__Subgroup_5	f__norank_c__Subgroup_5	g__norank_c__Subgroup_5	s__uncultured_Truepera_sp.	ASV21636	1	8.18148e-7	0.03125
d__Bacteria	k__norank_d__Bacteria	p__Acidobacteriota	c__Subgroup_5	o__norank_c__Subgroup_5	f__norank_c__Subgroup_5	g__norank_c__Subgroup_5	s__uncultured_Truepera_sp.	ASV27220	2	1.6363e-6	0.03125
d__Bacteria	k__norank_d__Bacteria	p__Acidobacteriota	c__Subgroup_5	o__norank_c__Subgroup_5	f__norank_c__Subgroup_5	g__norank_c__Subgroup_5	s__uncultured_bacterium_c__Subgroup_5	ASV21747	1	8.18148e-7	0.03125
d__Bacteria	k__norank_d__Bacteria	p__Acidobacteriota	c__Thermoanaerobaculia	o__Thermoanaerobaculales	f__Thermoanaerobaculaceae	g__Subgroup_10	s__unclassified_g__Subgroup_10	ASV21080	2	1.6363e-6	0.03125
d__Bacteria	k__norank_d__Bacteria	p__Acidobacteriota	c__Thermoanaerobaculia	o__Thermoanaerobaculales	f__Thermoanaerobaculaceae	g__Subgroup_10	s__unclassified_g__Subgroup_10	ASV27065	1	8.18148e-7	0.03125
d__Bacteria	k__norank_d__Bacteria	p__Acidobacteriota	c__Vicinamibacteria	o__Vicinamibacterales	f__Vicinamibacteraceae	g__norank_f__Vicinamibacteraceae	s__unclassified_g__norank_f__Vicinamibacteraceae	ASV26174	1	8.18148e-7	0.03125
d__Bacteria	k__norank_d__Bacteria	p__Acidobacteriota	c__Vicinamibacteria	o__Vicinamibacterales	f__norank_o__Vicinamibacterales	g__norank_o__Vicinamibacterales	s__unclassified_g__norank_o__Vicinamibacterales	ASV20201	1	8.18148e-7	0.03125
d__Bacteria	k__norank_d__Bacteria	p__Acidobacteriota	c__Vicinamibacteria	o__Vicinamibacterales	f__norank_o__Vicinamibacterales	g__norank_o__Vicinamibacterales	s__unclassified_g__norank_o__Vicinamibacterales	ASV21729	1	8.18148e-7	0.03125
d__Bacteria	k__norank_d__Bacteria	p__Actinobacteriota	c__Acidimicrobiia	o__Acidimicrobiales	f__Acidimicrobiaceae	g__norank_f__Acidimicrobiaceae	s__uncultured_bacterium_f__Acidimicrobiaceae	ASV3537	46	4.0E-5	0.125
d__Bacteria	k__norank_d__Bacteria	p__Actinobacteriota	c__Acidimicrobiia	o__IMCC26256	f__norank_o__IMCC26256	g__norank_o__IMCC26256	s__unclassified_g__norank_o__IMCC26256	ASV1253	1	8.18148e-7	0.03125
d__Bacteria	k__norank_d__Bacteria	p__Actinobacteriota	c__Acidimicrobiia	o__IMCC26256	f__norank_o__IMCC26256	g__norank_o__IMCC26256	s__unclassified_g__norank_o__IMCC26256	ASV1756	40	3.0E-5	0.125
d__Bacteria	k__norank_d__Bacteria	p__Actinobacteriota	c__Acidimicrobiia	o__IMCC26256	f__norank_o__IMCC26256	g__norank_o__IMCC26256	s__unclassified_g__norank_o__IMCC26256	ASV21324	9	7.36334e-6	0.03125
d__Bacteria	k__norank_d__Bacteria	p__Actinobacteriota	c__Acidimicrobiia	o__IMCC26256	f__norank_o__IMCC26256	g__norank_o__IMCC26256	s__unclassified_g__norank_o__IMCC26256	ASV22236	14	1.0E-5	0.03125
d__Bacteria	k__norank_d__Bacteria	p__Actinobacteriota	c__Acidimicrobiia	o__IMCC26256	f__norank_o__IMCC26256	g__norank_o__IMCC26256	s__unclassified_g__norank_o__IMCC26256	ASV2446	20	2.0E-5	0.0625
d__Bacteria	k__norank_d__Bacteria	p__Actinobacteriota	c__Acidimicrobiia	o__IMCC26256	f__norank_o__IMCC26256	g__norank_o__IMCC26256	s__unclassified_g__norank_o__IMCC26256	ASV26591	7	5.72704e-6	0.03125
d__Bacteria	k__norank_d__Bacteria	p__Actinobacteriota	c__Acidimicrobiia	o__IMCC26256	f__norank_o__IMCC26256	g__norank_o__IMCC26256	s__unclassified_g__norank_o__IMCC26256	ASV26690	6	4.90889e-6	0.03125
d__Bacteria	k__norank_d__Bacteria	p__Actinobacteriota	c__Acidimicrobiia	o__IMCC26256	f__norank_o__IMCC26256	g__norank_o__IMCC26256	s__unclassified_g__norank_o__IMCC26256	ASV26928	2	1.6363e-6	0.03125
d__Bacteria	k__norank_d__Bacteria	p__Actinobacteriota	c__Acidimicrobiia	o__IMCC26256	f__norank_o__IMCC26256	g__norank_o__IMCC26256	s__unclassified_g__norank_o__IMCC26256	ASV2718	5	4.09074e-6	0.03125
d__Bacteria	k__norank_d__Bacteria	p__Actinobacteriota	c__Acidimicrobiia	o__IMCC26256	f__norank_o__IMCC26256	g__norank_o__IMCC26256	s__unclassified_g__norank_o__IMCC26256	ASV29649	3	2.45445e-6	0.03125
d__Bacteria	k__norank_d__Bacteria	p__Actinobacteriota	c__Acidimicrobiia	o__IMCC26256	f__norank_o__IMCC26256	g__norank_o__IMCC26256	s__unclassified_g__norank_o__IMCC26256	ASV29930	2	1.6363e-6	0.03125
d__Bacteria	k__norank_d__Bacteria	p__Actinobacteriota	c__Acidimicrobiia	o__IMCC26256	f__norank_o__IMCC26256	g__norank_o__IMCC26256	s__unclassified_g__norank_o__IMCC26256	ASV317	188	0.00015	0.375
d__Bacteria	k__norank_d__Bacteria	p__Actinobacteriota	c__Acidimicrobiia	o__IMCC26256	f__norank_o__IMCC26256	g__norank_o__IMCC26256	s__unclassified_g__norank_o__IMCC26256	ASV32659	2	1.6363e-6	0.03125
d__Bacteria	k__norank_d__Bacteria	p__Actinobacteriota	c__Acidimicrobiia	o__IMCC26256	f__norank_o__IMCC26256	g__norank_o__IMCC26256	s__unclassified_g__norank_o__IMCC26256	ASV4292	33	3.0E-5	0.09375
d__Bacteria	k__norank_d__Bacteria	p__Actinobacteriota	c__Acidimicrobiia	o__IMCC26256	f__norank_o__IMCC26256	g__norank_o__IMCC26256	s__unclassified_g__norank_o__IMCC26256	ASV4402	10	8.18148e-6	0.03125
d__Bacteria	k__norank_d__Bacteria	p__Actinobacteriota	c__Acidimicrobiia	o__IMCC26256	f__norank_o__IMCC26256	g__norank_o__IMCC26256	s__unclassified_g__norank_o__IMCC26256	ASV4530	17	1.0E-5	0.0625
d__Bacteria	k__norank_d__Bacteria	p__Actinobacteriota	c__Acidimicrobiia	o__IMCC26256	f__norank_o__IMCC26256	g__norank_o__IMCC26256	s__unclassified_g__norank_o__IMCC26256	ASV6691	3	2.45445e-6	0.03125
d__Bacteria	k__norank_d__Bacteria	p__Actinobacteriota	c__Acidimicrobiia	o__IMCC26256	f__norank_o__IMCC26256	g__norank_o__IMCC26256	s__unclassified_g__norank_o__IMCC26256	ASV7932	4	3.27259e-6	0.03125
d__Bacteria	k__norank_d__Bacteria	p__Actinobacteriota	c__Acidimicrobiia	o__IMCC26256	f__norank_o__IMCC26256	g__norank_o__IMCC26256	s__unclassified_g__norank_o__IMCC26256	ASV8530	2	1.6363e-6	0.03125
d__Bacteria	k__norank_d__Bacteria	p__Actinobacteriota	c__Acidimicrobiia	o__IMCC26256	f__norank_o__IMCC26256	g__norank_o__IMCC26256	s__unclassified_g__norank_o__IMCC26256	ASV8781	6	4.90889e-6	0.03125
d__Bacteria	k__norank_d__Bacteria	p__Actinobacteriota	c__Acidimicrobiia	o__IMCC26256	f__norank_o__IMCC26256	g__norank_o__IMCC26256	s__unclassified_g__norank_o__IMCC26256	ASV9699	24	2.0E-5	0.0625
d__Bacteria	k__norank_d__Bacteria	p__Actinobacteriota	c__Acidimicrobiia	o__IMCC26256	f__norank_o__IMCC26256	g__norank_o__IMCC26256	s__uncultured_Actinomycetales_bacterium_o__IMCC26256	ASV2649	56	5.0E-5	0.3125
d__Bacteria	k__norank_d__Bacteria	p__Actinobacteriota	c__Acidimicrobiia	o__IMCC26256	f__norank_o__IMCC26256	g__norank_o__IMCC26256	s__uncultured_Actinomycetales_bacterium_o__IMCC26256	ASV29831	2	1.6363e-6	0.03125
d__Bacteria	k__norank_d__Bacteria	p__Actinobacteriota	c__Acidimicrobiia	o__IMCC26256	f__norank_o__IMCC26256	g__norank_o__IMCC26256	s__uncultured_Ferrimicrobium_sp.	ASV3536	37	3.0E-5	0.125
d__Bacteria	k__norank_d__Bacteria	p__Actinobacteriota	c__Acidimicrobiia	o__IMCC26256	f__norank_o__IMCC26256	g__norank_o__IMCC26256	s__uncultured_actinobacterium_o__IMCC26256	ASV22462	3	2.45445e-6	0.03125
d__Bacteria	k__norank_d__Bacteria	p__Actinobacteriota	c__Acidimicrobiia	o__IMCC26256	f__norank_o__IMCC26256	g__norank_o__IMCC26256	s__uncultured_bacterium_o__IMCC26256	ASV2617	23	2.0E-5	0.125
d__Bacteria	k__norank_d__Bacteria	p__Actinobacteriota	c__Acidimicrobiia	o__IMCC26256	f__norank_o__IMCC26256	g__norank_o__IMCC26256	s__uncultured_bacterium_o__IMCC26256	ASV6126	4	3.27259e-6	0.03125
d__Bacteria	k__norank_d__Bacteria	p__Actinobacteriota	c__Acidimicrobiia	o__Microtrichales	f__Iamiaceae	g__Iamia	s__unclassified_g__Iamia	ASV3352	27	2.0E-5	0.03125
d__Bacteria	k__norank_d__Bacteria	p__Actinobacteriota	c__Acidimicrobiia	o__Microtrichales	f__Iamiaceae	g__Iamia	s__uncultured_Acidimicrobiales_bacterium_g__Iamia	ASV20824	5	4.09074e-6	0.03125
d__Bacteria	k__norank_d__Bacteria	p__Actinobacteriota	c__Acidimicrobiia	o__Microtrichales	f__Iamiaceae	g__Iamia	s__uncultured_Acidimicrobiales_bacterium_g__Iamia	ASV4901	1	8.18148e-7	0.03125
d__Bacteria	k__norank_d__Bacteria	p__Actinobacteriota	c__Acidimicrobiia	o__Microtrichales	f__Ilumatobacteraceae	g__Ilumatobacter	s__unclassified_g__Ilumatobacter	ASV858	25	2.0E-5	0.15625
d__Bacteria	k__norank_d__Bacteria	p__Actinobacteriota	c__Acidimicrobiia	o__Microtrichales	f__Ilumatobacteraceae	g__norank_f__Ilumatobacteraceae	s__metagenome_f__Ilumatobacteraceae	ASV8866	4	3.27259e-6	0.03125
d__Bacteria	k__norank_d__Bacteria	p__Actinobacteriota	c__Acidimicrobiia	o__Microtrichales	f__Ilumatobacteraceae	g__norank_f__Ilumatobacteraceae	s__metagenome_f__Ilumatobacteraceae	ASV963	14	1.0E-5	0.125
d__Bacteria	k__norank_d__Bacteria	p__Actinobacteriota	c__Acidimicrobiia	o__Microtrichales	f__Ilumatobacteraceae	g__norank_f__Ilumatobacteraceae	s__unclassified_g__norank_f__Ilumatobacteraceae	ASV20754	8	6.54519e-6	0.03125
d__Bacteria	k__norank_d__Bacteria	p__Actinobacteriota	c__Acidimicrobiia	o__Microtrichales	f__Ilumatobacteraceae	g__norank_f__Ilumatobacteraceae	s__unclassified_g__norank_f__Ilumatobacteraceae	ASV20868	4	3.27259e-6	0.03125
d__Bacteria	k__norank_d__Bacteria	p__Actinobacteriota	c__Acidimicrobiia	o__Microtrichales	f__Ilumatobacteraceae	g__norank_f__Ilumatobacteraceae	s__unclassified_g__norank_f__Ilumatobacteraceae	ASV20910	4	3.27259e-6	0.03125
d__Bacteria	k__norank_d__Bacteria	p__Actinobacteriota	c__Acidimicrobiia	o__Microtrichales	f__Ilumatobacteraceae	g__norank_f__Ilumatobacteraceae	s__unclassified_g__norank_f__Ilumatobacteraceae	ASV21537	5	4.09074e-6	0.03125
d__Bacteria	k__norank_d__Bacteria	p__Actinobacteriota	c__Acidimicrobiia	o__Microtrichales	f__Ilumatobacteraceae	g__norank_f__Ilumatobacteraceae	s__unclassified_g__norank_f__Ilumatobacteraceae	ASV21892	2	1.6363e-6	0.03125
d__Bacteria	k__norank_d__Bacteria	p__Actinobacteriota	c__Acidimicrobiia	o__Microtrichales	f__Ilumatobacteraceae	g__norank_f__Ilumatobacteraceae	s__unclassified_g__norank_f__Ilumatobacteraceae	ASV22701	2	1.6363e-6	0.03125
d__Bacteria	k__norank_d__Bacteria	p__Actinobacteriota	c__Acidimicrobiia	o__Microtrichales	f__Ilumatobacteraceae	g__norank_f__Ilumatobacteraceae	s__unclassified_g__norank_f__Ilumatobacteraceae	ASV23223	13	1.0E-5	0.03125
d__Bacteria	k__norank_d__Bacteria	p__Actinobacteriota	c__Acidimicrobiia	o__Microtrichales	f__Ilumatobacteraceae	g__norank_f__Ilumatobacteraceae	s__unclassified_g__norank_f__Ilumatobacteraceae	ASV26800	4	3.27259e-6	0.03125
d__Bacteria	k__norank_d__Bacteria	p__Actinobacteriota	c__Acidimicrobiia	o__Microtrichales	f__Ilumatobacteraceae	g__norank_f__Ilumatobacteraceae	s__unclassified_g__norank_f__Ilumatobacteraceae	ASV29625	2	1.6363e-6	0.03125
d__Bacteria	k__norank_d__Bacteria	p__Actinobacteriota	c__Acidimicrobiia	o__Microtrichales	f__Ilumatobacteraceae	g__norank_f__Ilumatobacteraceae	s__unclassified_g__norank_f__Ilumatobacteraceae	ASV30022	1	8.18148e-7	0.03125
d__Bacteria	k__norank_d__Bacteria	p__Actinobacteriota	c__Acidimicrobiia	o__Microtrichales	f__Ilumatobacteraceae	g__norank_f__Ilumatobacteraceae	s__unclassified_g__norank_f__Ilumatobacteraceae	ASV30046	1	8.18148e-7	0.03125
d__Bacteria	k__norank_d__Bacteria	p__Actinobacteriota	c__Acidimicrobiia	o__Microtrichales	f__Ilumatobacteraceae	g__norank_f__Ilumatobacteraceae	s__unclassified_g__norank_f__Ilumatobacteraceae	ASV3266	5	4.09074e-6	0.0625
d__Bacteria	k__norank_d__Bacteria	p__Actinobacteriota	c__Acidimicrobiia	o__Microtrichales	f__Ilumatobacteraceae	g__norank_f__Ilumatobacteraceae	s__unclassified_g__norank_f__Ilumatobacteraceae	ASV457	11	8.99963e-6	0.03125
d__Bacteria	k__norank_d__Bacteria	p__Actinobacteriota	c__Acidimicrobiia	o__Microtrichales	f__Ilumatobacteraceae	g__norank_f__Ilumatobacteraceae	s__unclassified_g__norank_f__Ilumatobacteraceae	ASV6478	2	1.6363e-6	0.03125
d__Bacteria	k__norank_d__Bacteria	p__Actinobacteriota	c__Acidimicrobiia	o__Microtrichales	f__Ilumatobacteraceae	g__norank_f__Ilumatobacteraceae	s__unclassified_g__norank_f__Ilumatobacteraceae	ASV8906	39	3.0E-5	0.125
d__Bacteria	k__norank_d__Bacteria	p__Actinobacteriota	c__Acidimicrobiia	o__Microtrichales	f__Ilumatobacteraceae	g__norank_f__Ilumatobacteraceae	s__uncultured_Actinomycetales_bacterium_f__Ilumatobacteraceae	ASV23439	4	3.27259e-6	0.03125
d__Bacteria	k__norank_d__Bacteria	p__Actinobacteriota	c__Acidimicrobiia	o__Microtrichales	f__Microtrichaceae	g__IMCC26207	s__unclassified_g__IMCC26207	ASV8903	37	3.0E-5	0.09375
d__Bacteria	k__norank_d__Bacteria	p__Actinobacteriota	c__Acidimicrobiia	o__Microtrichales	f__Microtrichaceae	g__unclassified_f__Microtrichaceae	s__unclassified_f__Microtrichaceae	ASV20997	2	1.6363e-6	0.03125
d__Bacteria	k__norank_d__Bacteria	p__Actinobacteriota	c__Acidimicrobiia	o__Microtrichales	f__Microtrichaceae	g__unclassified_f__Microtrichaceae	s__unclassified_f__Microtrichaceae	ASV2502	12	9.81778e-6	0.0625
d__Bacteria	k__norank_d__Bacteria	p__Actinobacteriota	c__Acidimicrobiia	o__Microtrichales	f__norank_o__Microtrichales	g__norank_o__Microtrichales	s__bacterium_YC-ZSS-LKJ199	ASV4735	8	6.54519e-6	0.0625
d__Bacteria	k__norank_d__Bacteria	p__Actinobacteriota	c__Acidimicrobiia	o__Microtrichales	f__norank_o__Microtrichales	g__norank_o__Microtrichales	s__unclassified_g__norank_o__Microtrichales	ASV20171	3	2.45445e-6	0.03125
d__Bacteria	k__norank_d__Bacteria	p__Actinobacteriota	c__Acidimicrobiia	o__Microtrichales	f__norank_o__Microtrichales	g__norank_o__Microtrichales	s__unclassified_g__norank_o__Microtrichales	ASV20828	5	4.09074e-6	0.03125
d__Bacteria	k__norank_d__Bacteria	p__Actinobacteriota	c__Acidimicrobiia	o__Microtrichales	f__norank_o__Microtrichales	g__norank_o__Microtrichales	s__unclassified_g__norank_o__Microtrichales	ASV2086	71	6.0E-5	0.15625
d__Bacteria	k__norank_d__Bacteria	p__Actinobacteriota	c__Acidimicrobiia	o__Microtrichales	f__norank_o__Microtrichales	g__norank_o__Microtrichales	s__unclassified_g__norank_o__Microtrichales	ASV21295	12	9.81778e-6	0.03125
d__Bacteria	k__norank_d__Bacteria	p__Actinobacteriota	c__Acidimicrobiia	o__Microtrichales	f__norank_o__Microtrichales	g__norank_o__Microtrichales	s__unclassified_g__norank_o__Microtrichales	ASV21499	5	4.09074e-6	0.03125
d__Bacteria	k__norank_d__Bacteria	p__Actinobacteriota	c__Acidimicrobiia	o__Microtrichales	f__norank_o__Microtrichales	g__norank_o__Microtrichales	s__unclassified_g__norank_o__Microtrichales	ASV21566	3	2.45445e-6	0.03125
d__Bacteria	k__norank_d__Bacteria	p__Actinobacteriota	c__Acidimicrobiia	o__Microtrichales	f__norank_o__Microtrichales	g__norank_o__Microtrichales	s__unclassified_g__norank_o__Microtrichales	ASV22291	12	9.81778e-6	0.03125
d__Bacteria	k__norank_d__Bacteria	p__Actinobacteriota	c__Acidimicrobiia	o__Microtrichales	f__norank_o__Microtrichales	g__norank_o__Microtrichales	s__unclassified_g__norank_o__Microtrichales	ASV27016	2	1.6363e-6	0.03125
d__Bacteria	k__norank_d__Bacteria	p__Actinobacteriota	c__Acidimicrobiia	o__Microtrichales	f__norank_o__Microtrichales	g__norank_o__Microtrichales	s__unclassified_g__norank_o__Microtrichales	ASV397	156	0.00013	0.28125
d__Bacteria	k__norank_d__Bacteria	p__Actinobacteriota	c__Acidimicrobiia	o__Microtrichales	f__norank_o__Microtrichales	g__norank_o__Microtrichales	s__unclassified_g__norank_o__Microtrichales	ASV4338	18	1.0E-5	0.03125
d__Bacteria	k__norank_d__Bacteria	p__Actinobacteriota	c__Acidimicrobiia	o__Microtrichales	f__norank_o__Microtrichales	g__norank_o__Microtrichales	s__unclassified_g__norank_o__Microtrichales	ASV514	26	2.0E-5	0.0625
d__Bacteria	k__norank_d__Bacteria	p__Actinobacteriota	c__Acidimicrobiia	o__Microtrichales	f__norank_o__Microtrichales	g__norank_o__Microtrichales	s__unclassified_g__norank_o__Microtrichales	ASV6319	2	1.6363e-6	0.03125
d__Bacteria	k__norank_d__Bacteria	p__Actinobacteriota	c__Acidimicrobiia	o__Microtrichales	f__norank_o__Microtrichales	g__norank_o__Microtrichales	s__unclassified_g__norank_o__Microtrichales	ASV651	27	2.0E-5	0.09375
d__Bacteria	k__norank_d__Bacteria	p__Actinobacteriota	c__Acidimicrobiia	o__Microtrichales	f__norank_o__Microtrichales	g__norank_o__Microtrichales	s__unclassified_g__norank_o__Microtrichales	ASV846	22	2.0E-5	0.09375
d__Bacteria	k__norank_d__Bacteria	p__Actinobacteriota	c__Acidimicrobiia	o__Microtrichales	f__norank_o__Microtrichales	g__norank_o__Microtrichales	s__uncultured_Acidimicrobiia_bacterium_o__Microtrichales	ASV21475	5	4.09074e-6	0.03125
d__Bacteria	k__norank_d__Bacteria	p__Actinobacteriota	c__Acidimicrobiia	o__Microtrichales	f__norank_o__Microtrichales	g__norank_o__Microtrichales	s__uncultured_Acidimicrobiia_bacterium_o__Microtrichales	ASV29842	2	1.6363e-6	0.03125
d__Bacteria	k__norank_d__Bacteria	p__Actinobacteriota	c__Acidimicrobiia	o__Microtrichales	f__norank_o__Microtrichales	g__norank_o__Microtrichales	s__uncultured_compost_bacterium_o__Microtrichales	ASV20516	1	8.18148e-7	0.03125
d__Bacteria	k__norank_d__Bacteria	p__Actinobacteriota	c__Acidimicrobiia	o__Microtrichales	f__norank_o__Microtrichales	g__norank_o__Microtrichales	s__uncultured_compost_bacterium_o__Microtrichales	ASV2993	59	5.0E-5	0.1875
d__Bacteria	k__norank_d__Bacteria	p__Actinobacteriota	c__Acidimicrobiia	o__Microtrichales	f__norank_o__Microtrichales	g__norank_o__Microtrichales	s__uncultured_compost_bacterium_o__Microtrichales	ASV954	3	2.45445e-6	0.03125
d__Bacteria	k__norank_d__Bacteria	p__Actinobacteriota	c__Acidimicrobiia	o__Microtrichales	f__unclassified_o__Microtrichales	g__unclassified_o__Microtrichales	s__unclassified_o__Microtrichales	ASV20114	3	2.45445e-6	0.03125
d__Bacteria	k__norank_d__Bacteria	p__Actinobacteriota	c__Acidimicrobiia	o__Microtrichales	f__unclassified_o__Microtrichales	g__unclassified_o__Microtrichales	s__unclassified_o__Microtrichales	ASV21579	3	2.45445e-6	0.03125
d__Bacteria	k__norank_d__Bacteria	p__Actinobacteriota	c__Acidimicrobiia	o__Microtrichales	f__unclassified_o__Microtrichales	g__unclassified_o__Microtrichales	s__unclassified_o__Microtrichales	ASV22314	8	6.54519e-6	0.03125
d__Bacteria	k__norank_d__Bacteria	p__Actinobacteriota	c__Acidimicrobiia	o__Microtrichales	f__unclassified_o__Microtrichales	g__unclassified_o__Microtrichales	s__unclassified_o__Microtrichales	ASV22638	1	8.18148e-7	0.03125
d__Bacteria	k__norank_d__Bacteria	p__Actinobacteriota	c__Acidimicrobiia	o__Microtrichales	f__unclassified_o__Microtrichales	g__unclassified_o__Microtrichales	s__unclassified_o__Microtrichales	ASV23327	4	3.27259e-6	0.03125
d__Bacteria	k__norank_d__Bacteria	p__Actinobacteriota	c__Acidimicrobiia	o__Microtrichales	f__unclassified_o__Microtrichales	g__unclassified_o__Microtrichales	s__unclassified_o__Microtrichales	ASV2406	217	0.00018	0.28125
d__Bacteria	k__norank_d__Bacteria	p__Actinobacteriota	c__Acidimicrobiia	o__Microtrichales	f__unclassified_o__Microtrichales	g__unclassified_o__Microtrichales	s__unclassified_o__Microtrichales	ASV2443	4	3.27259e-6	0.03125
d__Bacteria	k__norank_d__Bacteria	p__Actinobacteriota	c__Acidimicrobiia	o__Microtrichales	f__unclassified_o__Microtrichales	g__unclassified_o__Microtrichales	s__unclassified_o__Microtrichales	ASV2581	18	1.0E-5	0.09375
d__Bacteria	k__norank_d__Bacteria	p__Actinobacteriota	c__Acidimicrobiia	o__Microtrichales	f__unclassified_o__Microtrichales	g__unclassified_o__Microtrichales	s__unclassified_o__Microtrichales	ASV26025	4	3.27259e-6	0.03125
d__Bacteria	k__norank_d__Bacteria	p__Actinobacteriota	c__Acidimicrobiia	o__Microtrichales	f__unclassified_o__Microtrichales	g__unclassified_o__Microtrichales	s__unclassified_o__Microtrichales	ASV29554	6	4.90889e-6	0.03125
d__Bacteria	k__norank_d__Bacteria	p__Actinobacteriota	c__Acidimicrobiia	o__Microtrichales	f__unclassified_o__Microtrichales	g__unclassified_o__Microtrichales	s__unclassified_o__Microtrichales	ASV29727	3	2.45445e-6	0.03125
d__Bacteria	k__norank_d__Bacteria	p__Actinobacteriota	c__Acidimicrobiia	o__Microtrichales	f__unclassified_o__Microtrichales	g__unclassified_o__Microtrichales	s__unclassified_o__Microtrichales	ASV432	36	3.0E-5	0.15625
d__Bacteria	k__norank_d__Bacteria	p__Actinobacteriota	c__Acidimicrobiia	o__Microtrichales	f__unclassified_o__Microtrichales	g__unclassified_o__Microtrichales	s__unclassified_o__Microtrichales	ASV4649	4	3.27259e-6	0.03125
d__Bacteria	k__norank_d__Bacteria	p__Actinobacteriota	c__Acidimicrobiia	o__Microtrichales	f__unclassified_o__Microtrichales	g__unclassified_o__Microtrichales	s__unclassified_o__Microtrichales	ASV6205	2	1.6363e-6	0.03125
d__Bacteria	k__norank_d__Bacteria	p__Actinobacteriota	c__Acidimicrobiia	o__Microtrichales	f__unclassified_o__Microtrichales	g__unclassified_o__Microtrichales	s__unclassified_o__Microtrichales	ASV6989	2	1.6363e-6	0.03125
d__Bacteria	k__norank_d__Bacteria	p__Actinobacteriota	c__Acidimicrobiia	o__Microtrichales	f__unclassified_o__Microtrichales	g__unclassified_o__Microtrichales	s__unclassified_o__Microtrichales	ASV742	5	4.09074e-6	0.03125
d__Bacteria	k__norank_d__Bacteria	p__Actinobacteriota	c__Acidimicrobiia	o__Microtrichales	f__unclassified_o__Microtrichales	g__unclassified_o__Microtrichales	s__unclassified_o__Microtrichales	ASV761	16	1.0E-5	0.15625
d__Bacteria	k__norank_d__Bacteria	p__Actinobacteriota	c__Acidimicrobiia	o__Microtrichales	f__unclassified_o__Microtrichales	g__unclassified_o__Microtrichales	s__unclassified_o__Microtrichales	ASV8707	9	7.36334e-6	0.03125
d__Bacteria	k__norank_d__Bacteria	p__Actinobacteriota	c__Acidimicrobiia	o__Microtrichales	f__unclassified_o__Microtrichales	g__unclassified_o__Microtrichales	s__unclassified_o__Microtrichales	ASV8747	7	5.72704e-6	0.03125
d__Bacteria	k__norank_d__Bacteria	p__Actinobacteriota	c__Acidimicrobiia	o__norank_c__Acidimicrobiia	f__norank_c__Acidimicrobiia	g__norank_c__Acidimicrobiia	s__unclassified_g__norank_c__Acidimicrobiia	ASV21487	4	3.27259e-6	0.03125
d__Bacteria	k__norank_d__Bacteria	p__Actinobacteriota	c__Acidimicrobiia	o__norank_c__Acidimicrobiia	f__norank_c__Acidimicrobiia	g__norank_c__Acidimicrobiia	s__unclassified_g__norank_c__Acidimicrobiia	ASV21795	2	1.6363e-6	0.03125
d__Bacteria	k__norank_d__Bacteria	p__Actinobacteriota	c__Acidimicrobiia	o__norank_c__Acidimicrobiia	f__norank_c__Acidimicrobiia	g__norank_c__Acidimicrobiia	s__unclassified_g__norank_c__Acidimicrobiia	ASV29629	4	3.27259e-6	0.03125
d__Bacteria	k__norank_d__Bacteria	p__Actinobacteriota	c__Acidimicrobiia	o__norank_c__Acidimicrobiia	f__norank_c__Acidimicrobiia	g__norank_c__Acidimicrobiia	s__unclassified_g__norank_c__Acidimicrobiia	ASV3756	14	1.0E-5	0.0625
d__Bacteria	k__norank_d__Bacteria	p__Actinobacteriota	c__Acidimicrobiia	o__norank_c__Acidimicrobiia	f__norank_c__Acidimicrobiia	g__norank_c__Acidimicrobiia	s__unclassified_g__norank_c__Acidimicrobiia	ASV6154	5	4.09074e-6	0.03125
d__Bacteria	k__norank_d__Bacteria	p__Actinobacteriota	c__Acidimicrobiia	o__norank_c__Acidimicrobiia	f__norank_c__Acidimicrobiia	g__norank_c__Acidimicrobiia	s__uncultured_forest_soil_bacterium_c__Acidimicrobiia	ASV23371	5	4.09074e-6	0.03125
d__Bacteria	k__norank_d__Bacteria	p__Actinobacteriota	c__Acidimicrobiia	o__unclassified_c__Acidimicrobiia	f__unclassified_c__Acidimicrobiia	g__unclassified_c__Acidimicrobiia	s__unclassified_c__Acidimicrobiia	ASV1502	47	4.0E-5	0.1875
d__Bacteria	k__norank_d__Bacteria	p__Actinobacteriota	c__Acidimicrobiia	o__unclassified_c__Acidimicrobiia	f__unclassified_c__Acidimicrobiia	g__unclassified_c__Acidimicrobiia	s__unclassified_c__Acidimicrobiia	ASV1568	25	2.0E-5	0.0625
d__Bacteria	k__norank_d__Bacteria	p__Actinobacteriota	c__Acidimicrobiia	o__unclassified_c__Acidimicrobiia	f__unclassified_c__Acidimicrobiia	g__unclassified_c__Acidimicrobiia	s__unclassified_c__Acidimicrobiia	ASV20280	1	8.18148e-7	0.03125
d__Bacteria	k__norank_d__Bacteria	p__Actinobacteriota	c__Acidimicrobiia	o__unclassified_c__Acidimicrobiia	f__unclassified_c__Acidimicrobiia	g__unclassified_c__Acidimicrobiia	s__unclassified_c__Acidimicrobiia	ASV20324	1	8.18148e-7	0.03125
d__Bacteria	k__norank_d__Bacteria	p__Actinobacteriota	c__Acidimicrobiia	o__unclassified_c__Acidimicrobiia	f__unclassified_c__Acidimicrobiia	g__unclassified_c__Acidimicrobiia	s__unclassified_c__Acidimicrobiia	ASV20331	2	1.6363e-6	0.03125
d__Bacteria	k__norank_d__Bacteria	p__Actinobacteriota	c__Acidimicrobiia	o__unclassified_c__Acidimicrobiia	f__unclassified_c__Acidimicrobiia	g__unclassified_c__Acidimicrobiia	s__unclassified_c__Acidimicrobiia	ASV20360	2	1.6363e-6	0.03125
d__Bacteria	k__norank_d__Bacteria	p__Actinobacteriota	c__Acidimicrobiia	o__unclassified_c__Acidimicrobiia	f__unclassified_c__Acidimicrobiia	g__unclassified_c__Acidimicrobiia	s__unclassified_c__Acidimicrobiia	ASV20490	1	8.18148e-7	0.03125
d__Bacteria	k__norank_d__Bacteria	p__Actinobacteriota	c__Acidimicrobiia	o__unclassified_c__Acidimicrobiia	f__unclassified_c__Acidimicrobiia	g__unclassified_c__Acidimicrobiia	s__unclassified_c__Acidimicrobiia	ASV21224	18	1.0E-5	0.03125
d__Bacteria	k__norank_d__Bacteria	p__Actinobacteriota	c__Acidimicrobiia	o__unclassified_c__Acidimicrobiia	f__unclassified_c__Acidimicrobiia	g__unclassified_c__Acidimicrobiia	s__unclassified_c__Acidimicrobiia	ASV21280	10	8.18148e-6	0.03125
d__Bacteria	k__norank_d__Bacteria	p__Actinobacteriota	c__Acidimicrobiia	o__unclassified_c__Acidimicrobiia	f__unclassified_c__Acidimicrobiia	g__unclassified_c__Acidimicrobiia	s__unclassified_c__Acidimicrobiia	ASV21342	8	6.54519e-6	0.03125
d__Bacteria	k__norank_d__Bacteria	p__Actinobacteriota	c__Acidimicrobiia	o__unclassified_c__Acidimicrobiia	f__unclassified_c__Acidimicrobiia	g__unclassified_c__Acidimicrobiia	s__unclassified_c__Acidimicrobiia	ASV21389	6	4.90889e-6	0.03125
d__Bacteria	k__norank_d__Bacteria	p__Actinobacteriota	c__Acidimicrobiia	o__unclassified_c__Acidimicrobiia	f__unclassified_c__Acidimicrobiia	g__unclassified_c__Acidimicrobiia	s__unclassified_c__Acidimicrobiia	ASV21407	7	5.72704e-6	0.03125
d__Bacteria	k__norank_d__Bacteria	p__Actinobacteriota	c__Acidimicrobiia	o__unclassified_c__Acidimicrobiia	f__unclassified_c__Acidimicrobiia	g__unclassified_c__Acidimicrobiia	s__unclassified_c__Acidimicrobiia	ASV21647	3	2.45445e-6	0.03125
d__Bacteria	k__norank_d__Bacteria	p__Actinobacteriota	c__Acidimicrobiia	o__unclassified_c__Acidimicrobiia	f__unclassified_c__Acidimicrobiia	g__unclassified_c__Acidimicrobiia	s__unclassified_c__Acidimicrobiia	ASV22476	7	5.72704e-6	0.03125
d__Bacteria	k__norank_d__Bacteria	p__Actinobacteriota	c__Acidimicrobiia	o__unclassified_c__Acidimicrobiia	f__unclassified_c__Acidimicrobiia	g__unclassified_c__Acidimicrobiia	s__unclassified_c__Acidimicrobiia	ASV22540	4	3.27259e-6	0.03125
d__Bacteria	k__norank_d__Bacteria	p__Actinobacteriota	c__Acidimicrobiia	o__unclassified_c__Acidimicrobiia	f__unclassified_c__Acidimicrobiia	g__unclassified_c__Acidimicrobiia	s__unclassified_c__Acidimicrobiia	ASV22853	2	1.6363e-6	0.03125
d__Bacteria	k__norank_d__Bacteria	p__Actinobacteriota	c__Acidimicrobiia	o__unclassified_c__Acidimicrobiia	f__unclassified_c__Acidimicrobiia	g__unclassified_c__Acidimicrobiia	s__unclassified_c__Acidimicrobiia	ASV22916	2	1.6363e-6	0.03125
d__Bacteria	k__norank_d__Bacteria	p__Actinobacteriota	c__Acidimicrobiia	o__unclassified_c__Acidimicrobiia	f__unclassified_c__Acidimicrobiia	g__unclassified_c__Acidimicrobiia	s__unclassified_c__Acidimicrobiia	ASV23328	8	6.54519e-6	0.03125
d__Bacteria	k__norank_d__Bacteria	p__Actinobacteriota	c__Acidimicrobiia	o__unclassified_c__Acidimicrobiia	f__unclassified_c__Acidimicrobiia	g__unclassified_c__Acidimicrobiia	s__unclassified_c__Acidimicrobiia	ASV26508	10	8.18148e-6	0.03125
d__Bacteria	k__norank_d__Bacteria	p__Actinobacteriota	c__Acidimicrobiia	o__unclassified_c__Acidimicrobiia	f__unclassified_c__Acidimicrobiia	g__unclassified_c__Acidimicrobiia	s__unclassified_c__Acidimicrobiia	ASV26520	10	8.18148e-6	0.03125
d__Bacteria	k__norank_d__Bacteria	p__Actinobacteriota	c__Acidimicrobiia	o__unclassified_c__Acidimicrobiia	f__unclassified_c__Acidimicrobiia	g__unclassified_c__Acidimicrobiia	s__unclassified_c__Acidimicrobiia	ASV27187	1	8.18148e-7	0.03125
d__Bacteria	k__norank_d__Bacteria	p__Actinobacteriota	c__Acidimicrobiia	o__unclassified_c__Acidimicrobiia	f__unclassified_c__Acidimicrobiia	g__unclassified_c__Acidimicrobiia	s__unclassified_c__Acidimicrobiia	ASV29566	6	4.90889e-6	0.03125
d__Bacteria	k__norank_d__Bacteria	p__Actinobacteriota	c__Acidimicrobiia	o__unclassified_c__Acidimicrobiia	f__unclassified_c__Acidimicrobiia	g__unclassified_c__Acidimicrobiia	s__unclassified_c__Acidimicrobiia	ASV29925	2	1.6363e-6	0.03125
d__Bacteria	k__norank_d__Bacteria	p__Actinobacteriota	c__Acidimicrobiia	o__unclassified_c__Acidimicrobiia	f__unclassified_c__Acidimicrobiia	g__unclassified_c__Acidimicrobiia	s__unclassified_c__Acidimicrobiia	ASV30043	1	8.18148e-7	0.03125
d__Bacteria	k__norank_d__Bacteria	p__Actinobacteriota	c__Acidimicrobiia	o__unclassified_c__Acidimicrobiia	f__unclassified_c__Acidimicrobiia	g__unclassified_c__Acidimicrobiia	s__unclassified_c__Acidimicrobiia	ASV30076	1	8.18148e-7	0.03125
d__Bacteria	k__norank_d__Bacteria	p__Actinobacteriota	c__Acidimicrobiia	o__unclassified_c__Acidimicrobiia	f__unclassified_c__Acidimicrobiia	g__unclassified_c__Acidimicrobiia	s__unclassified_c__Acidimicrobiia	ASV3180	28	2.0E-5	0.03125
d__Bacteria	k__norank_d__Bacteria	p__Actinobacteriota	c__Acidimicrobiia	o__unclassified_c__Acidimicrobiia	f__unclassified_c__Acidimicrobiia	g__unclassified_c__Acidimicrobiia	s__unclassified_c__Acidimicrobiia	ASV32592	2	1.6363e-6	0.03125
d__Bacteria	k__norank_d__Bacteria	p__Actinobacteriota	c__Acidimicrobiia	o__unclassified_c__Acidimicrobiia	f__unclassified_c__Acidimicrobiia	g__unclassified_c__Acidimicrobiia	s__unclassified_c__Acidimicrobiia	ASV3787	16	1.0E-5	0.0625
d__Bacteria	k__norank_d__Bacteria	p__Actinobacteriota	c__Acidimicrobiia	o__unclassified_c__Acidimicrobiia	f__unclassified_c__Acidimicrobiia	g__unclassified_c__Acidimicrobiia	s__unclassified_c__Acidimicrobiia	ASV4804	1	8.18148e-7	0.03125
d__Bacteria	k__norank_d__Bacteria	p__Actinobacteriota	c__Acidimicrobiia	o__unclassified_c__Acidimicrobiia	f__unclassified_c__Acidimicrobiia	g__unclassified_c__Acidimicrobiia	s__unclassified_c__Acidimicrobiia	ASV5664	6	4.90889e-6	0.03125
d__Bacteria	k__norank_d__Bacteria	p__Actinobacteriota	c__Acidimicrobiia	o__unclassified_c__Acidimicrobiia	f__unclassified_c__Acidimicrobiia	g__unclassified_c__Acidimicrobiia	s__unclassified_c__Acidimicrobiia	ASV6194	3	2.45445e-6	0.03125
d__Bacteria	k__norank_d__Bacteria	p__Actinobacteriota	c__Acidimicrobiia	o__unclassified_c__Acidimicrobiia	f__unclassified_c__Acidimicrobiia	g__unclassified_c__Acidimicrobiia	s__unclassified_c__Acidimicrobiia	ASV6286	3	2.45445e-6	0.03125
d__Bacteria	k__norank_d__Bacteria	p__Actinobacteriota	c__Acidimicrobiia	o__unclassified_c__Acidimicrobiia	f__unclassified_c__Acidimicrobiia	g__unclassified_c__Acidimicrobiia	s__unclassified_c__Acidimicrobiia	ASV6374	2	1.6363e-6	0.03125
d__Bacteria	k__norank_d__Bacteria	p__Actinobacteriota	c__Acidimicrobiia	o__unclassified_c__Acidimicrobiia	f__unclassified_c__Acidimicrobiia	g__unclassified_c__Acidimicrobiia	s__unclassified_c__Acidimicrobiia	ASV6428	1	8.18148e-7	0.03125
d__Bacteria	k__norank_d__Bacteria	p__Actinobacteriota	c__Actinobacteria	o__0319-7L14	f__norank_o__0319-7L14	g__norank_o__0319-7L14	s__uncultured_actinobacterium_o__0319-7L14	ASV27096	1	8.18148e-7	0.03125
d__Bacteria	k__norank_d__Bacteria	p__Actinobacteriota	c__Actinobacteria	o__0319-7L14	f__norank_o__0319-7L14	g__norank_o__0319-7L14	s__uncultured_bacterium_o__0319-7L14	ASV1607	40	3.0E-5	0.21875
d__Bacteria	k__norank_d__Bacteria	p__Actinobacteriota	c__Actinobacteria	o__0319-7L14	f__norank_o__0319-7L14	g__norank_o__0319-7L14	s__uncultured_bacterium_o__0319-7L14	ASV20916	3	2.45445e-6	0.03125
d__Bacteria	k__norank_d__Bacteria	p__Actinobacteriota	c__Actinobacteria	o__Actinomycetales	f__Actinomycetaceae	g__Actinomyces	s__Gleimia_europaea	ASV4447	7	5.72704e-6	0.03125
d__Bacteria	k__norank_d__Bacteria	p__Actinobacteriota	c__Actinobacteria	o__Actinomycetales	f__Actinomycetaceae	g__Actinomyces	s__unclassified_g__Actinomyces	ASV4948	2	1.6363e-6	0.03125
d__Bacteria	k__norank_d__Bacteria	p__Actinobacteriota	c__Actinobacteria	o__Actinomycetales	f__Actinomycetaceae	g__norank_f__Actinomycetaceae	s__uncultured_Actinomycetaceae_bacterium	ASV20011	1	8.18148e-7	0.03125
d__Bacteria	k__norank_d__Bacteria	p__Actinobacteriota	c__Actinobacteria	o__Bifidobacteriales	f__Bifidobacteriaceae	g__Bifidobacterium	s__Bifidobacterium_subtile	ASV21071	1	8.18148e-7	0.03125
d__Bacteria	k__norank_d__Bacteria	p__Actinobacteriota	c__Actinobacteria	o__Catenulisporales	f__Actinospicaceae	g__Actinospica	s__unclassified_g__Actinospica	ASV20288	2	1.6363e-6	0.03125
d__Bacteria	k__norank_d__Bacteria	p__Actinobacteriota	c__Actinobacteria	o__Catenulisporales	f__Actinospicaceae	g__Actinospica	s__unclassified_g__Actinospica	ASV23315	8	6.54519e-6	0.03125
d__Bacteria	k__norank_d__Bacteria	p__Actinobacteriota	c__Actinobacteria	o__Catenulisporales	f__Actinospicaceae	g__Actinospica	s__unclassified_g__Actinospica	ASV23491	2	1.6363e-6	0.03125
d__Bacteria	k__norank_d__Bacteria	p__Actinobacteriota	c__Actinobacteria	o__Catenulisporales	f__Actinospicaceae	g__Actinospica	s__unclassified_g__Actinospica	ASV26526	10	8.18148e-6	0.03125
d__Bacteria	k__norank_d__Bacteria	p__Actinobacteriota	c__Actinobacteria	o__Catenulisporales	f__Actinospicaceae	g__Actinospica	s__unclassified_g__Actinospica	ASV26671	4	3.27259e-6	0.03125
d__Bacteria	k__norank_d__Bacteria	p__Actinobacteriota	c__Actinobacteria	o__Catenulisporales	f__Catenulisporaceae	g__Catenulispora	s__unclassified_g__Catenulispora	ASV23262	10	8.18148e-6	0.03125
d__Bacteria	k__norank_d__Bacteria	p__Actinobacteriota	c__Actinobacteria	o__Catenulisporales	f__Catenulisporaceae	g__Catenulispora	s__unclassified_g__Catenulispora	ASV23495	3	2.45445e-6	0.03125
d__Bacteria	k__norank_d__Bacteria	p__Actinobacteriota	c__Actinobacteria	o__Catenulisporales	f__Catenulisporaceae	g__Catenulispora	s__unclassified_g__Catenulispora	ASV713	5	4.09074e-6	0.03125
d__Bacteria	k__norank_d__Bacteria	p__Actinobacteriota	c__Actinobacteria	o__Corynebacteriales	f__Corynebacteriaceae	g__Corynebacterium	s__Corynebacterium_ureicelerivorans	ASV28321	5	4.09074e-6	0.03125
d__Bacteria	k__norank_d__Bacteria	p__Actinobacteriota	c__Actinobacteria	o__Corynebacteriales	f__Corynebacteriaceae	g__Corynebacterium	s__unclassified_g__Corynebacterium	ASV20124	1	8.18148e-7	0.03125
d__Bacteria	k__norank_d__Bacteria	p__Actinobacteriota	c__Actinobacteria	o__Corynebacteriales	f__Corynebacteriaceae	g__Corynebacterium	s__unclassified_g__Corynebacterium	ASV29491	7	5.72704e-6	0.03125
d__Bacteria	k__norank_d__Bacteria	p__Actinobacteriota	c__Actinobacteria	o__Corynebacteriales	f__Corynebacteriaceae	g__Corynebacterium	s__unclassified_g__Corynebacterium	ASV3133	14	1.0E-5	0.03125
d__Bacteria	k__norank_d__Bacteria	p__Actinobacteriota	c__Actinobacteria	o__Corynebacteriales	f__Corynebacteriaceae	g__Corynebacterium	s__unclassified_g__Corynebacterium	ASV32536	2	1.6363e-6	0.03125
d__Bacteria	k__norank_d__Bacteria	p__Actinobacteriota	c__Actinobacteria	o__Corynebacteriales	f__Mycobacteriaceae	g__Mycobacterium	s__unclassified_g__Mycobacterium	ASV1193	2	1.6363e-6	0.03125
d__Bacteria	k__norank_d__Bacteria	p__Actinobacteriota	c__Actinobacteria	o__Corynebacteriales	f__Mycobacteriaceae	g__Mycobacterium	s__unclassified_g__Mycobacterium	ASV1195	1	8.18148e-7	0.03125
d__Bacteria	k__norank_d__Bacteria	p__Actinobacteriota	c__Actinobacteria	o__Corynebacteriales	f__Mycobacteriaceae	g__Mycobacterium	s__unclassified_g__Mycobacterium	ASV1354	174	0.00014	0.1875
d__Bacteria	k__norank_d__Bacteria	p__Actinobacteriota	c__Actinobacteria	o__Corynebacteriales	f__Mycobacteriaceae	g__Mycobacterium	s__unclassified_g__Mycobacterium	ASV177	420	0.00034	0.40625
d__Bacteria	k__norank_d__Bacteria	p__Actinobacteriota	c__Actinobacteria	o__Corynebacteriales	f__Mycobacteriaceae	g__Mycobacterium	s__unclassified_g__Mycobacterium	ASV20343	3	2.45445e-6	0.03125
d__Bacteria	k__norank_d__Bacteria	p__Actinobacteriota	c__Actinobacteria	o__Corynebacteriales	f__Mycobacteriaceae	g__Mycobacterium	s__unclassified_g__Mycobacterium	ASV20519	1	8.18148e-7	0.03125
d__Bacteria	k__norank_d__Bacteria	p__Actinobacteriota	c__Actinobacteria	o__Corynebacteriales	f__Mycobacteriaceae	g__Mycobacterium	s__unclassified_g__Mycobacterium	ASV20695	8	6.54519e-6	0.03125
d__Bacteria	k__norank_d__Bacteria	p__Actinobacteriota	c__Actinobacteria	o__Corynebacteriales	f__Mycobacteriaceae	g__Mycobacterium	s__unclassified_g__Mycobacterium	ASV21002	3	2.45445e-6	0.03125
d__Bacteria	k__norank_d__Bacteria	p__Actinobacteriota	c__Actinobacteria	o__Corynebacteriales	f__Mycobacteriaceae	g__Mycobacterium	s__unclassified_g__Mycobacterium	ASV21012	3	2.45445e-6	0.03125
d__Bacteria	k__norank_d__Bacteria	p__Actinobacteriota	c__Actinobacteria	o__Corynebacteriales	f__Mycobacteriaceae	g__Mycobacterium	s__unclassified_g__Mycobacterium	ASV21099	2	1.6363e-6	0.03125
d__Bacteria	k__norank_d__Bacteria	p__Actinobacteriota	c__Actinobacteria	o__Corynebacteriales	f__Mycobacteriaceae	g__Mycobacterium	s__unclassified_g__Mycobacterium	ASV21168	68	6.0E-5	0.03125
d__Bacteria	k__norank_d__Bacteria	p__Actinobacteriota	c__Actinobacteria	o__Corynebacteriales	f__Mycobacteriaceae	g__Mycobacterium	s__unclassified_g__Mycobacterium	ASV21178	29	2.0E-5	0.03125
d__Bacteria	k__norank_d__Bacteria	p__Actinobacteriota	c__Actinobacteria	o__Corynebacteriales	f__Mycobacteriaceae	g__Mycobacterium	s__unclassified_g__Mycobacterium	ASV21196	27	2.0E-5	0.03125
d__Bacteria	k__norank_d__Bacteria	p__Actinobacteriota	c__Actinobacteria	o__Corynebacteriales	f__Mycobacteriaceae	g__Mycobacterium	s__unclassified_g__Mycobacterium	ASV21326	11	8.99963e-6	0.03125
d__Bacteria	k__norank_d__Bacteria	p__Actinobacteriota	c__Actinobacteria	o__Corynebacteriales	f__Mycobacteriaceae	g__Mycobacterium	s__unclassified_g__Mycobacterium	ASV21349	8	6.54519e-6	0.03125
d__Bacteria	k__norank_d__Bacteria	p__Actinobacteriota	c__Actinobacteria	o__Corynebacteriales	f__Mycobacteriaceae	g__Mycobacterium	s__unclassified_g__Mycobacterium	ASV21509	7	5.72704e-6	0.03125
d__Bacteria	k__norank_d__Bacteria	p__Actinobacteriota	c__Actinobacteria	o__Corynebacteriales	f__Mycobacteriaceae	g__Mycobacterium	s__unclassified_g__Mycobacterium	ASV21686	2	1.6363e-6	0.03125
d__Bacteria	k__norank_d__Bacteria	p__Actinobacteriota	c__Actinobacteria	o__Corynebacteriales	f__Mycobacteriaceae	g__Mycobacterium	s__unclassified_g__Mycobacterium	ASV21706	1	8.18148e-7	0.03125
d__Bacteria	k__norank_d__Bacteria	p__Actinobacteriota	c__Actinobacteria	o__Corynebacteriales	f__Mycobacteriaceae	g__Mycobacterium	s__unclassified_g__Mycobacterium	ASV21804	1	8.18148e-7	0.03125
d__Bacteria	k__norank_d__Bacteria	p__Actinobacteriota	c__Actinobacteria	o__Corynebacteriales	f__Mycobacteriaceae	g__Mycobacterium	s__unclassified_g__Mycobacterium	ASV21815	1	8.18148e-7	0.03125
d__Bacteria	k__norank_d__Bacteria	p__Actinobacteriota	c__Actinobacteria	o__Corynebacteriales	f__Mycobacteriaceae	g__Mycobacterium	s__unclassified_g__Mycobacterium	ASV22216	14	1.0E-5	0.03125
d__Bacteria	k__norank_d__Bacteria	p__Actinobacteriota	c__Actinobacteria	o__Corynebacteriales	f__Mycobacteriaceae	g__Mycobacterium	s__unclassified_g__Mycobacterium	ASV22639	3	2.45445e-6	0.03125
d__Bacteria	k__norank_d__Bacteria	p__Actinobacteriota	c__Actinobacteria	o__Corynebacteriales	f__Mycobacteriaceae	g__Mycobacterium	s__unclassified_g__Mycobacterium	ASV22670	1	8.18148e-7	0.03125
d__Bacteria	k__norank_d__Bacteria	p__Actinobacteriota	c__Actinobacteria	o__Corynebacteriales	f__Mycobacteriaceae	g__Mycobacterium	s__unclassified_g__Mycobacterium	ASV22726	2	1.6363e-6	0.03125
d__Bacteria	k__norank_d__Bacteria	p__Actinobacteriota	c__Actinobacteria	o__Corynebacteriales	f__Mycobacteriaceae	g__Mycobacterium	s__unclassified_g__Mycobacterium	ASV23214	20	2.0E-5	0.03125
d__Bacteria	k__norank_d__Bacteria	p__Actinobacteriota	c__Actinobacteria	o__Corynebacteriales	f__Mycobacteriaceae	g__Mycobacterium	s__unclassified_g__Mycobacterium	ASV23450	4	3.27259e-6	0.03125
d__Bacteria	k__norank_d__Bacteria	p__Actinobacteriota	c__Actinobacteria	o__Corynebacteriales	f__Mycobacteriaceae	g__Mycobacterium	s__unclassified_g__Mycobacterium	ASV23631	2	1.6363e-6	0.03125
d__Bacteria	k__norank_d__Bacteria	p__Actinobacteriota	c__Actinobacteria	o__Corynebacteriales	f__Mycobacteriaceae	g__Mycobacterium	s__unclassified_g__Mycobacterium	ASV252	230	0.00019	0.21875
d__Bacteria	k__norank_d__Bacteria	p__Actinobacteriota	c__Actinobacteria	o__Corynebacteriales	f__Mycobacteriaceae	g__Mycobacterium	s__unclassified_g__Mycobacterium	ASV25210	14	1.0E-5	0.03125
d__Bacteria	k__norank_d__Bacteria	p__Actinobacteriota	c__Actinobacteria	o__Corynebacteriales	f__Mycobacteriaceae	g__Mycobacterium	s__unclassified_g__Mycobacterium	ASV26219	3	2.45445e-6	0.03125
d__Bacteria	k__norank_d__Bacteria	p__Actinobacteriota	c__Actinobacteria	o__Corynebacteriales	f__Mycobacteriaceae	g__Mycobacterium	s__unclassified_g__Mycobacterium	ASV26528	7	5.72704e-6	0.03125
d__Bacteria	k__norank_d__Bacteria	p__Actinobacteriota	c__Actinobacteria	o__Corynebacteriales	f__Mycobacteriaceae	g__Mycobacterium	s__unclassified_g__Mycobacterium	ASV26641	6	4.90889e-6	0.03125
d__Bacteria	k__norank_d__Bacteria	p__Actinobacteriota	c__Actinobacteria	o__Corynebacteriales	f__Mycobacteriaceae	g__Mycobacterium	s__unclassified_g__Mycobacterium	ASV26745	4	3.27259e-6	0.03125
d__Bacteria	k__norank_d__Bacteria	p__Actinobacteriota	c__Actinobacteria	o__Corynebacteriales	f__Mycobacteriaceae	g__Mycobacterium	s__unclassified_g__Mycobacterium	ASV26761	4	3.27259e-6	0.03125
d__Bacteria	k__norank_d__Bacteria	p__Actinobacteriota	c__Actinobacteria	o__Corynebacteriales	f__Mycobacteriaceae	g__Mycobacterium	s__unclassified_g__Mycobacterium	ASV26844	4	3.27259e-6	0.03125
d__Bacteria	k__norank_d__Bacteria	p__Actinobacteriota	c__Actinobacteria	o__Corynebacteriales	f__Mycobacteriaceae	g__Mycobacterium	s__unclassified_g__Mycobacterium	ASV26915	2	1.6363e-6	0.03125
d__Bacteria	k__norank_d__Bacteria	p__Actinobacteriota	c__Actinobacteria	o__Corynebacteriales	f__Mycobacteriaceae	g__Mycobacterium	s__unclassified_g__Mycobacterium	ASV27121	1	8.18148e-7	0.03125
d__Bacteria	k__norank_d__Bacteria	p__Actinobacteriota	c__Actinobacteria	o__Corynebacteriales	f__Mycobacteriaceae	g__Mycobacterium	s__unclassified_g__Mycobacterium	ASV29261	3	2.45445e-6	0.03125
d__Bacteria	k__norank_d__Bacteria	p__Actinobacteriota	c__Actinobacteria	o__Corynebacteriales	f__Mycobacteriaceae	g__Mycobacterium	s__unclassified_g__Mycobacterium	ASV29444	6	4.90889e-6	0.03125
d__Bacteria	k__norank_d__Bacteria	p__Actinobacteriota	c__Actinobacteria	o__Corynebacteriales	f__Mycobacteriaceae	g__Mycobacterium	s__unclassified_g__Mycobacterium	ASV29602	3	2.45445e-6	0.03125
d__Bacteria	k__norank_d__Bacteria	p__Actinobacteriota	c__Actinobacteria	o__Corynebacteriales	f__Mycobacteriaceae	g__Mycobacterium	s__unclassified_g__Mycobacterium	ASV2985	1051	0.00086	0.3125
d__Bacteria	k__norank_d__Bacteria	p__Actinobacteriota	c__Actinobacteria	o__Corynebacteriales	f__Mycobacteriaceae	g__Mycobacterium	s__unclassified_g__Mycobacterium	ASV29875	2	1.6363e-6	0.03125
d__Bacteria	k__norank_d__Bacteria	p__Actinobacteriota	c__Actinobacteria	o__Corynebacteriales	f__Mycobacteriaceae	g__Mycobacterium	s__unclassified_g__Mycobacterium	ASV3001	103	8.0E-5	0.09375
d__Bacteria	k__norank_d__Bacteria	p__Actinobacteriota	c__Actinobacteria	o__Corynebacteriales	f__Mycobacteriaceae	g__Mycobacterium	s__unclassified_g__Mycobacterium	ASV30065	2	1.6363e-6	0.03125
d__Bacteria	k__norank_d__Bacteria	p__Actinobacteriota	c__Actinobacteria	o__Corynebacteriales	f__Mycobacteriaceae	g__Mycobacterium	s__unclassified_g__Mycobacterium	ASV3034	83	7.0E-5	0.15625
d__Bacteria	k__norank_d__Bacteria	p__Actinobacteriota	c__Actinobacteria	o__Corynebacteriales	f__Mycobacteriaceae	g__Mycobacterium	s__unclassified_g__Mycobacterium	ASV3107	186	0.00015	0.3125
d__Bacteria	k__norank_d__Bacteria	p__Actinobacteriota	c__Actinobacteria	o__Corynebacteriales	f__Mycobacteriaceae	g__Mycobacterium	s__unclassified_g__Mycobacterium	ASV3626	20	2.0E-5	0.125
d__Bacteria	k__norank_d__Bacteria	p__Actinobacteriota	c__Actinobacteria	o__Corynebacteriales	f__Mycobacteriaceae	g__Mycobacterium	s__unclassified_g__Mycobacterium	ASV392	35	3.0E-5	0.0625
d__Bacteria	k__norank_d__Bacteria	p__Actinobacteriota	c__Actinobacteria	o__Corynebacteriales	f__Mycobacteriaceae	g__Mycobacterium	s__unclassified_g__Mycobacterium	ASV411	46	4.0E-5	0.09375
d__Bacteria	k__norank_d__Bacteria	p__Actinobacteriota	c__Actinobacteria	o__Corynebacteriales	f__Mycobacteriaceae	g__Mycobacterium	s__unclassified_g__Mycobacterium	ASV4270	119	0.0001	0.1875
d__Bacteria	k__norank_d__Bacteria	p__Actinobacteriota	c__Actinobacteria	o__Corynebacteriales	f__Mycobacteriaceae	g__Mycobacterium	s__unclassified_g__Mycobacterium	ASV4302	22	2.0E-5	0.03125
d__Bacteria	k__norank_d__Bacteria	p__Actinobacteriota	c__Actinobacteria	o__Corynebacteriales	f__Mycobacteriaceae	g__Mycobacterium	s__unclassified_g__Mycobacterium	ASV4325	184	0.00015	0.1875
d__Bacteria	k__norank_d__Bacteria	p__Actinobacteriota	c__Actinobacteria	o__Corynebacteriales	f__Mycobacteriaceae	g__Mycobacterium	s__unclassified_g__Mycobacterium	ASV4737	2	1.6363e-6	0.03125
d__Bacteria	k__norank_d__Bacteria	p__Actinobacteriota	c__Actinobacteria	o__Corynebacteriales	f__Mycobacteriaceae	g__Mycobacterium	s__unclassified_g__Mycobacterium	ASV4754	1	8.18148e-7	0.03125
d__Bacteria	k__norank_d__Bacteria	p__Actinobacteriota	c__Actinobacteria	o__Corynebacteriales	f__Mycobacteriaceae	g__Mycobacterium	s__unclassified_g__Mycobacterium	ASV4857	2	1.6363e-6	0.03125
d__Bacteria	k__norank_d__Bacteria	p__Actinobacteriota	c__Actinobacteria	o__Corynebacteriales	f__Mycobacteriaceae	g__Mycobacterium	s__unclassified_g__Mycobacterium	ASV5649	6	4.90889e-6	0.03125
d__Bacteria	k__norank_d__Bacteria	p__Actinobacteriota	c__Actinobacteria	o__Corynebacteriales	f__Mycobacteriaceae	g__Mycobacterium	s__unclassified_g__Mycobacterium	ASV5734	2	1.6363e-6	0.03125
d__Bacteria	k__norank_d__Bacteria	p__Actinobacteriota	c__Actinobacteria	o__Corynebacteriales	f__Mycobacteriaceae	g__Mycobacterium	s__unclassified_g__Mycobacterium	ASV6227	7	5.72704e-6	0.0625
d__Bacteria	k__norank_d__Bacteria	p__Actinobacteriota	c__Actinobacteria	o__Corynebacteriales	f__Mycobacteriaceae	g__Mycobacterium	s__unclassified_g__Mycobacterium	ASV6620	23	2.0E-5	0.09375
d__Bacteria	k__norank_d__Bacteria	p__Actinobacteriota	c__Actinobacteria	o__Corynebacteriales	f__Mycobacteriaceae	g__Mycobacterium	s__unclassified_g__Mycobacterium	ASV6687	2	1.6363e-6	0.03125
d__Bacteria	k__norank_d__Bacteria	p__Actinobacteriota	c__Actinobacteria	o__Corynebacteriales	f__Mycobacteriaceae	g__Mycobacterium	s__unclassified_g__Mycobacterium	ASV6749	2	1.6363e-6	0.03125
d__Bacteria	k__norank_d__Bacteria	p__Actinobacteriota	c__Actinobacteria	o__Corynebacteriales	f__Mycobacteriaceae	g__Mycobacterium	s__unclassified_g__Mycobacterium	ASV7168	8	6.54519e-6	0.03125
d__Bacteria	k__norank_d__Bacteria	p__Actinobacteriota	c__Actinobacteria	o__Corynebacteriales	f__Mycobacteriaceae	g__Mycobacterium	s__unclassified_g__Mycobacterium	ASV7212	62	5.0E-5	0.15625
d__Bacteria	k__norank_d__Bacteria	p__Actinobacteriota	c__Actinobacteria	o__Corynebacteriales	f__Mycobacteriaceae	g__Mycobacterium	s__unclassified_g__Mycobacterium	ASV7323	3	2.45445e-6	0.03125
d__Bacteria	k__norank_d__Bacteria	p__Actinobacteriota	c__Actinobacteria	o__Corynebacteriales	f__Mycobacteriaceae	g__Mycobacterium	s__unclassified_g__Mycobacterium	ASV7372	3	2.45445e-6	0.03125
d__Bacteria	k__norank_d__Bacteria	p__Actinobacteriota	c__Actinobacteria	o__Corynebacteriales	f__Mycobacteriaceae	g__Mycobacterium	s__unclassified_g__Mycobacterium	ASV738	6	4.90889e-6	0.03125
d__Bacteria	k__norank_d__Bacteria	p__Actinobacteriota	c__Actinobacteria	o__Corynebacteriales	f__Mycobacteriaceae	g__Mycobacterium	s__unclassified_g__Mycobacterium	ASV7418	2	1.6363e-6	0.03125
d__Bacteria	k__norank_d__Bacteria	p__Actinobacteriota	c__Actinobacteria	o__Corynebacteriales	f__Mycobacteriaceae	g__Mycobacterium	s__unclassified_g__Mycobacterium	ASV744	5	4.09074e-6	0.03125
d__Bacteria	k__norank_d__Bacteria	p__Actinobacteriota	c__Actinobacteria	o__Corynebacteriales	f__Mycobacteriaceae	g__Mycobacterium	s__unclassified_g__Mycobacterium	ASV7786	9	7.36334e-6	0.03125
d__Bacteria	k__norank_d__Bacteria	p__Actinobacteriota	c__Actinobacteria	o__Corynebacteriales	f__Mycobacteriaceae	g__Mycobacterium	s__unclassified_g__Mycobacterium	ASV787	3	2.45445e-6	0.03125
d__Bacteria	k__norank_d__Bacteria	p__Actinobacteriota	c__Actinobacteria	o__Corynebacteriales	f__Mycobacteriaceae	g__Mycobacterium	s__unclassified_g__Mycobacterium	ASV830	3	2.45445e-6	0.03125
d__Bacteria	k__norank_d__Bacteria	p__Actinobacteriota	c__Actinobacteria	o__Corynebacteriales	f__Mycobacteriaceae	g__Mycobacterium	s__unclassified_g__Mycobacterium	ASV8387	86	7.0E-5	0.1875
d__Bacteria	k__norank_d__Bacteria	p__Actinobacteriota	c__Actinobacteria	o__Corynebacteriales	f__Mycobacteriaceae	g__Mycobacterium	s__unclassified_g__Mycobacterium	ASV8468	2	1.6363e-6	0.03125
d__Bacteria	k__norank_d__Bacteria	p__Actinobacteriota	c__Actinobacteria	o__Corynebacteriales	f__Mycobacteriaceae	g__Mycobacterium	s__unclassified_g__Mycobacterium	ASV8888	2	1.6363e-6	0.03125
d__Bacteria	k__norank_d__Bacteria	p__Actinobacteriota	c__Actinobacteria	o__Corynebacteriales	f__Mycobacteriaceae	g__Mycobacterium	s__unclassified_g__Mycobacterium	ASV955	3	2.45445e-6	0.03125
d__Bacteria	k__norank_d__Bacteria	p__Actinobacteriota	c__Actinobacteria	o__Corynebacteriales	f__Nocardiaceae	g__Gordonia	s__unclassified_g__Gordonia	ASV1024	1	8.18148e-7	0.03125
d__Bacteria	k__norank_d__Bacteria	p__Actinobacteriota	c__Actinobacteria	o__Corynebacteriales	f__Nocardiaceae	g__Gordonia	s__unclassified_g__Gordonia	ASV1682	21	2.0E-5	0.09375
d__Bacteria	k__norank_d__Bacteria	p__Actinobacteriota	c__Actinobacteria	o__Corynebacteriales	f__Nocardiaceae	g__Gordonia	s__unclassified_g__Gordonia	ASV20028	1	8.18148e-7	0.03125
d__Bacteria	k__norank_d__Bacteria	p__Actinobacteriota	c__Actinobacteria	o__Corynebacteriales	f__Nocardiaceae	g__Gordonia	s__unclassified_g__Gordonia	ASV21354	8	6.54519e-6	0.03125
d__Bacteria	k__norank_d__Bacteria	p__Actinobacteriota	c__Actinobacteria	o__Corynebacteriales	f__Nocardiaceae	g__Gordonia	s__unclassified_g__Gordonia	ASV21568	5	4.09074e-6	0.03125
d__Bacteria	k__norank_d__Bacteria	p__Actinobacteriota	c__Actinobacteria	o__Corynebacteriales	f__Nocardiaceae	g__Gordonia	s__unclassified_g__Gordonia	ASV21742	2	1.6363e-6	0.03125
d__Bacteria	k__norank_d__Bacteria	p__Actinobacteriota	c__Actinobacteria	o__Corynebacteriales	f__Nocardiaceae	g__Gordonia	s__unclassified_g__Gordonia	ASV21790	2	1.6363e-6	0.03125
d__Bacteria	k__norank_d__Bacteria	p__Actinobacteriota	c__Actinobacteria	o__Corynebacteriales	f__Nocardiaceae	g__Gordonia	s__unclassified_g__Gordonia	ASV23470	2	1.6363e-6	0.03125
d__Bacteria	k__norank_d__Bacteria	p__Actinobacteriota	c__Actinobacteria	o__Corynebacteriales	f__Nocardiaceae	g__Gordonia	s__unclassified_g__Gordonia	ASV238	74	6.0E-5	0.21875
d__Bacteria	k__norank_d__Bacteria	p__Actinobacteriota	c__Actinobacteria	o__Corynebacteriales	f__Nocardiaceae	g__Gordonia	s__unclassified_g__Gordonia	ASV25894	2	1.6363e-6	0.03125
d__Bacteria	k__norank_d__Bacteria	p__Actinobacteriota	c__Actinobacteria	o__Corynebacteriales	f__Nocardiaceae	g__Gordonia	s__unclassified_g__Gordonia	ASV26188	2	1.6363e-6	0.03125
d__Bacteria	k__norank_d__Bacteria	p__Actinobacteriota	c__Actinobacteria	o__Corynebacteriales	f__Nocardiaceae	g__Gordonia	s__unclassified_g__Gordonia	ASV26439	27	2.0E-5	0.0625
d__Bacteria	k__norank_d__Bacteria	p__Actinobacteriota	c__Actinobacteria	o__Corynebacteriales	f__Nocardiaceae	g__Gordonia	s__unclassified_g__Gordonia	ASV26825	1	8.18148e-7	0.03125
d__Bacteria	k__norank_d__Bacteria	p__Actinobacteriota	c__Actinobacteria	o__Corynebacteriales	f__Nocardiaceae	g__Gordonia	s__unclassified_g__Gordonia	ASV26966	3	2.45445e-6	0.03125
d__Bacteria	k__norank_d__Bacteria	p__Actinobacteriota	c__Actinobacteria	o__Corynebacteriales	f__Nocardiaceae	g__Gordonia	s__unclassified_g__Gordonia	ASV27046	2	1.6363e-6	0.03125
d__Bacteria	k__norank_d__Bacteria	p__Actinobacteriota	c__Actinobacteria	o__Corynebacteriales	f__Nocardiaceae	g__Gordonia	s__unclassified_g__Gordonia	ASV27182	2	1.6363e-6	0.03125
d__Bacteria	k__norank_d__Bacteria	p__Actinobacteriota	c__Actinobacteria	o__Corynebacteriales	f__Nocardiaceae	g__Gordonia	s__unclassified_g__Gordonia	ASV29118	10	8.18148e-6	0.03125
d__Bacteria	k__norank_d__Bacteria	p__Actinobacteriota	c__Actinobacteria	o__Corynebacteriales	f__Nocardiaceae	g__Gordonia	s__unclassified_g__Gordonia	ASV29218	5	4.09074e-6	0.03125
d__Bacteria	k__norank_d__Bacteria	p__Actinobacteriota	c__Actinobacteria	o__Corynebacteriales	f__Nocardiaceae	g__Gordonia	s__unclassified_g__Gordonia	ASV29730	2	1.6363e-6	0.03125
d__Bacteria	k__norank_d__Bacteria	p__Actinobacteriota	c__Actinobacteria	o__Corynebacteriales	f__Nocardiaceae	g__Gordonia	s__unclassified_g__Gordonia	ASV29950	1	8.18148e-7	0.03125
d__Bacteria	k__norank_d__Bacteria	p__Actinobacteriota	c__Actinobacteria	o__Corynebacteriales	f__Nocardiaceae	g__Gordonia	s__unclassified_g__Gordonia	ASV29996	1	8.18148e-7	0.03125
d__Bacteria	k__norank_d__Bacteria	p__Actinobacteriota	c__Actinobacteria	o__Corynebacteriales	f__Nocardiaceae	g__Gordonia	s__unclassified_g__Gordonia	ASV351	86	7.0E-5	0.1875
d__Bacteria	k__norank_d__Bacteria	p__Actinobacteriota	c__Actinobacteria	o__Corynebacteriales	f__Nocardiaceae	g__Gordonia	s__unclassified_g__Gordonia	ASV4324	25	2.0E-5	0.0625
d__Bacteria	k__norank_d__Bacteria	p__Actinobacteriota	c__Actinobacteria	o__Corynebacteriales	f__Nocardiaceae	g__Gordonia	s__unclassified_g__Gordonia	ASV4836	3	2.45445e-6	0.03125
d__Bacteria	k__norank_d__Bacteria	p__Actinobacteriota	c__Actinobacteria	o__Corynebacteriales	f__Nocardiaceae	g__Gordonia	s__unclassified_g__Gordonia	ASV5654	6	4.90889e-6	0.03125
d__Bacteria	k__norank_d__Bacteria	p__Actinobacteriota	c__Actinobacteria	o__Corynebacteriales	f__Nocardiaceae	g__Gordonia	s__unclassified_g__Gordonia	ASV6038	7	5.72704e-6	0.03125
d__Bacteria	k__norank_d__Bacteria	p__Actinobacteriota	c__Actinobacteria	o__Corynebacteriales	f__Nocardiaceae	g__Gordonia	s__unclassified_g__Gordonia	ASV645	17	1.0E-5	0.0625
d__Bacteria	k__norank_d__Bacteria	p__Actinobacteriota	c__Actinobacteria	o__Corynebacteriales	f__Nocardiaceae	g__Gordonia	s__unclassified_g__Gordonia	ASV81	577	0.00047	0.71875
d__Bacteria	k__norank_d__Bacteria	p__Actinobacteriota	c__Actinobacteria	o__Corynebacteriales	f__Nocardiaceae	g__Gordonia	s__unclassified_g__Gordonia	ASV8831	3	2.45445e-6	0.03125
d__Bacteria	k__norank_d__Bacteria	p__Actinobacteriota	c__Actinobacteria	o__Corynebacteriales	f__Nocardiaceae	g__Gordonia	s__unclassified_g__Gordonia	ASV8987	2	1.6363e-6	0.03125
d__Bacteria	k__norank_d__Bacteria	p__Actinobacteriota	c__Actinobacteria	o__Corynebacteriales	f__Nocardiaceae	g__Nocardia	s__unclassified_g__Nocardia	ASV20716	7	5.72704e-6	0.03125
d__Bacteria	k__norank_d__Bacteria	p__Actinobacteriota	c__Actinobacteria	o__Corynebacteriales	f__Nocardiaceae	g__Nocardia	s__unclassified_g__Nocardia	ASV21535	6	4.90889e-6	0.0625
d__Bacteria	k__norank_d__Bacteria	p__Actinobacteriota	c__Actinobacteria	o__Corynebacteriales	f__Nocardiaceae	g__Nocardia	s__unclassified_g__Nocardia	ASV21599	3	2.45445e-6	0.03125
d__Bacteria	k__norank_d__Bacteria	p__Actinobacteriota	c__Actinobacteria	o__Corynebacteriales	f__Nocardiaceae	g__Nocardia	s__unclassified_g__Nocardia	ASV237	104	9.0E-5	0.21875
d__Bacteria	k__norank_d__Bacteria	p__Actinobacteriota	c__Actinobacteria	o__Corynebacteriales	f__Nocardiaceae	g__Nocardia	s__unclassified_g__Nocardia	ASV618	9	7.36334e-6	0.03125
d__Bacteria	k__norank_d__Bacteria	p__Actinobacteriota	c__Actinobacteria	o__Corynebacteriales	f__Nocardiaceae	g__Nocardia	s__unclassified_g__Nocardia	ASV751	5	4.09074e-6	0.03125
d__Bacteria	k__norank_d__Bacteria	p__Actinobacteriota	c__Actinobacteria	o__Corynebacteriales	f__Nocardiaceae	g__Rhodococcus	s__unclassified_g__Rhodococcus	ASV139	122	0.0001	0.1875
d__Bacteria	k__norank_d__Bacteria	p__Actinobacteriota	c__Actinobacteria	o__Corynebacteriales	f__Nocardiaceae	g__Rhodococcus	s__unclassified_g__Rhodococcus	ASV1406	10	8.18148e-6	0.03125
d__Bacteria	k__norank_d__Bacteria	p__Actinobacteriota	c__Actinobacteria	o__Corynebacteriales	f__Nocardiaceae	g__Rhodococcus	s__unclassified_g__Rhodococcus	ASV17	706	0.00058	0.5625
d__Bacteria	k__norank_d__Bacteria	p__Actinobacteriota	c__Actinobacteria	o__Corynebacteriales	f__Nocardiaceae	g__Rhodococcus	s__unclassified_g__Rhodococcus	ASV172	35	3.0E-5	0.03125
d__Bacteria	k__norank_d__Bacteria	p__Actinobacteriota	c__Actinobacteria	o__Corynebacteriales	f__Nocardiaceae	g__Rhodococcus	s__unclassified_g__Rhodococcus	ASV20218	3	2.45445e-6	0.03125
d__Bacteria	k__norank_d__Bacteria	p__Actinobacteriota	c__Actinobacteria	o__Corynebacteriales	f__Nocardiaceae	g__Rhodococcus	s__unclassified_g__Rhodococcus	ASV20951	2	1.6363e-6	0.03125
d__Bacteria	k__norank_d__Bacteria	p__Actinobacteriota	c__Actinobacteria	o__Corynebacteriales	f__Nocardiaceae	g__Rhodococcus	s__unclassified_g__Rhodococcus	ASV21055	3	2.45445e-6	0.03125
d__Bacteria	k__norank_d__Bacteria	p__Actinobacteriota	c__Actinobacteria	o__Corynebacteriales	f__Nocardiaceae	g__Rhodococcus	s__unclassified_g__Rhodococcus	ASV21271	9	7.36334e-6	0.03125
d__Bacteria	k__norank_d__Bacteria	p__Actinobacteriota	c__Actinobacteria	o__Corynebacteriales	f__Nocardiaceae	g__Rhodococcus	s__unclassified_g__Rhodococcus	ASV21771	2	1.6363e-6	0.03125
d__Bacteria	k__norank_d__Bacteria	p__Actinobacteriota	c__Actinobacteria	o__Corynebacteriales	f__Nocardiaceae	g__Rhodococcus	s__unclassified_g__Rhodococcus	ASV221	175	0.00014	0.28125
d__Bacteria	k__norank_d__Bacteria	p__Actinobacteriota	c__Actinobacteria	o__Corynebacteriales	f__Nocardiaceae	g__Rhodococcus	s__unclassified_g__Rhodococcus	ASV22725	3	2.45445e-6	0.03125
d__Bacteria	k__norank_d__Bacteria	p__Actinobacteriota	c__Actinobacteria	o__Corynebacteriales	f__Nocardiaceae	g__Rhodococcus	s__unclassified_g__Rhodococcus	ASV26861	4	3.27259e-6	0.03125
d__Bacteria	k__norank_d__Bacteria	p__Actinobacteriota	c__Actinobacteria	o__Corynebacteriales	f__Nocardiaceae	g__Rhodococcus	s__unclassified_g__Rhodococcus	ASV27006	2	1.6363e-6	0.03125
d__Bacteria	k__norank_d__Bacteria	p__Actinobacteriota	c__Actinobacteria	o__Corynebacteriales	f__Nocardiaceae	g__Rhodococcus	s__unclassified_g__Rhodococcus	ASV28359	4	3.27259e-6	0.03125
d__Bacteria	k__norank_d__Bacteria	p__Actinobacteriota	c__Actinobacteria	o__Corynebacteriales	f__Nocardiaceae	g__Rhodococcus	s__unclassified_g__Rhodococcus	ASV29221	5	4.09074e-6	0.03125
d__Bacteria	k__norank_d__Bacteria	p__Actinobacteriota	c__Actinobacteria	o__Corynebacteriales	f__Nocardiaceae	g__Rhodococcus	s__unclassified_g__Rhodococcus	ASV348	53	4.0E-5	0.125
d__Bacteria	k__norank_d__Bacteria	p__Actinobacteriota	c__Actinobacteria	o__Corynebacteriales	f__Nocardiaceae	g__Rhodococcus	s__unclassified_g__Rhodococcus	ASV417	28	2.0E-5	0.09375
d__Bacteria	k__norank_d__Bacteria	p__Actinobacteriota	c__Actinobacteria	o__Corynebacteriales	f__Nocardiaceae	g__Rhodococcus	s__unclassified_g__Rhodococcus	ASV573	11	8.99963e-6	0.03125
d__Bacteria	k__norank_d__Bacteria	p__Actinobacteriota	c__Actinobacteria	o__Corynebacteriales	f__Nocardiaceae	g__Rhodococcus	s__unclassified_g__Rhodococcus	ASV6090	5	4.09074e-6	0.03125
d__Bacteria	k__norank_d__Bacteria	p__Actinobacteriota	c__Actinobacteria	o__Corynebacteriales	f__Nocardiaceae	g__Rhodococcus	s__unclassified_g__Rhodococcus	ASV6869	4	3.27259e-6	0.03125
d__Bacteria	k__norank_d__Bacteria	p__Actinobacteriota	c__Actinobacteria	o__Corynebacteriales	f__Nocardiaceae	g__Rhodococcus	s__unclassified_g__Rhodococcus	ASV784	4	3.27259e-6	0.03125
d__Bacteria	k__norank_d__Bacteria	p__Actinobacteriota	c__Actinobacteria	o__Corynebacteriales	f__Nocardiaceae	g__Rhodococcus	s__unclassified_g__Rhodococcus	ASV835	3	2.45445e-6	0.03125
d__Bacteria	k__norank_d__Bacteria	p__Actinobacteriota	c__Actinobacteria	o__Corynebacteriales	f__Nocardiaceae	g__Smaragdicoccus	s__unclassified_g__Smaragdicoccus	ASV21693	2	1.6363e-6	0.03125
d__Bacteria	k__norank_d__Bacteria	p__Actinobacteriota	c__Actinobacteria	o__Corynebacteriales	f__Nocardiaceae	g__Williamsia	s__unclassified_g__Williamsia	ASV21291	11	8.99963e-6	0.03125
d__Bacteria	k__norank_d__Bacteria	p__Actinobacteriota	c__Actinobacteria	o__Corynebacteriales	f__Nocardiaceae	g__unclassified_f__Nocardiaceae	s__unclassified_f__Nocardiaceae	ASV21905	2	1.6363e-6	0.03125
d__Bacteria	k__norank_d__Bacteria	p__Actinobacteriota	c__Actinobacteria	o__Corynebacteriales	f__Nocardiaceae	g__unclassified_f__Nocardiaceae	s__unclassified_f__Nocardiaceae	ASV23392	6	4.90889e-6	0.03125
d__Bacteria	k__norank_d__Bacteria	p__Actinobacteriota	c__Actinobacteria	o__Corynebacteriales	f__Nocardiaceae	g__unclassified_f__Nocardiaceae	s__unclassified_f__Nocardiaceae	ASV29619	4	3.27259e-6	0.03125
d__Bacteria	k__norank_d__Bacteria	p__Actinobacteriota	c__Actinobacteria	o__Corynebacteriales	f__Nocardiaceae	g__unclassified_f__Nocardiaceae	s__unclassified_f__Nocardiaceae	ASV327	252	0.00021	0.34375
d__Bacteria	k__norank_d__Bacteria	p__Actinobacteriota	c__Actinobacteria	o__Corynebacteriales	f__Nocardiaceae	g__unclassified_f__Nocardiaceae	s__unclassified_f__Nocardiaceae	ASV828	7	5.72704e-6	0.0625
d__Bacteria	k__norank_d__Bacteria	p__Actinobacteriota	c__Actinobacteria	o__Corynebacteriales	f__Nocardiaceae	g__unclassified_f__Nocardiaceae	s__unclassified_f__Nocardiaceae	ASV8864	3	2.45445e-6	0.03125
d__Bacteria	k__norank_d__Bacteria	p__Actinobacteriota	c__Actinobacteria	o__Corynebacteriales	f__Nocardiaceae	g__unclassified_f__Nocardiaceae	s__unclassified_f__Nocardiaceae	ASV8958	3	2.45445e-6	0.03125
d__Bacteria	k__norank_d__Bacteria	p__Actinobacteriota	c__Actinobacteria	o__Corynebacteriales	f__Nocardiaceae	g__unclassified_f__Nocardiaceae	s__unclassified_f__Nocardiaceae	ASV991	4	3.27259e-6	0.03125
d__Bacteria	k__norank_d__Bacteria	p__Actinobacteriota	c__Actinobacteria	o__Corynebacteriales	f__Tsukamurellaceae	g__Tsukamurella	s__unclassified_g__Tsukamurella	ASV24131	11	8.99963e-6	0.03125
d__Bacteria	k__norank_d__Bacteria	p__Actinobacteriota	c__Actinobacteria	o__Corynebacteriales	f__unclassified_o__Corynebacteriales	g__unclassified_o__Corynebacteriales	s__unclassified_o__Corynebacteriales	ASV21850	2	1.6363e-6	0.03125
d__Bacteria	k__norank_d__Bacteria	p__Actinobacteriota	c__Actinobacteria	o__Corynebacteriales	f__unclassified_o__Corynebacteriales	g__unclassified_o__Corynebacteriales	s__unclassified_o__Corynebacteriales	ASV22738	3	2.45445e-6	0.03125
d__Bacteria	k__norank_d__Bacteria	p__Actinobacteriota	c__Actinobacteria	o__Corynebacteriales	f__unclassified_o__Corynebacteriales	g__unclassified_o__Corynebacteriales	s__unclassified_o__Corynebacteriales	ASV25913	2	1.6363e-6	0.03125
d__Bacteria	k__norank_d__Bacteria	p__Actinobacteriota	c__Actinobacteria	o__Corynebacteriales	f__unclassified_o__Corynebacteriales	g__unclassified_o__Corynebacteriales	s__unclassified_o__Corynebacteriales	ASV26234	2	1.6363e-6	0.03125
d__Bacteria	k__norank_d__Bacteria	p__Actinobacteriota	c__Actinobacteria	o__Corynebacteriales	f__unclassified_o__Corynebacteriales	g__unclassified_o__Corynebacteriales	s__unclassified_o__Corynebacteriales	ASV29822	1	8.18148e-7	0.03125
d__Bacteria	k__norank_d__Bacteria	p__Actinobacteriota	c__Actinobacteria	o__Corynebacteriales	f__unclassified_o__Corynebacteriales	g__unclassified_o__Corynebacteriales	s__unclassified_o__Corynebacteriales	ASV330	44	4.0E-5	0.0625
d__Bacteria	k__norank_d__Bacteria	p__Actinobacteriota	c__Actinobacteria	o__Corynebacteriales	f__unclassified_o__Corynebacteriales	g__unclassified_o__Corynebacteriales	s__unclassified_o__Corynebacteriales	ASV6715	2	1.6363e-6	0.03125
d__Bacteria	k__norank_d__Bacteria	p__Actinobacteriota	c__Actinobacteria	o__Corynebacteriales	f__unclassified_o__Corynebacteriales	g__unclassified_o__Corynebacteriales	s__unclassified_o__Corynebacteriales	ASV7272	4	3.27259e-6	0.03125
d__Bacteria	k__norank_d__Bacteria	p__Actinobacteriota	c__Actinobacteria	o__Euzebyales	f__Euzebyaceae	g__norank_f__Euzebyaceae	s__uncultured_bacterium_f__Euzebyaceae	ASV20548	1	8.18148e-7	0.03125
d__Bacteria	k__norank_d__Bacteria	p__Actinobacteriota	c__Actinobacteria	o__Frankiales	f__Acidothermaceae	g__Acidothermus	s__unclassified_g__Acidothermus	ASV22564	3	2.45445e-6	0.03125
d__Bacteria	k__norank_d__Bacteria	p__Actinobacteriota	c__Actinobacteria	o__Frankiales	f__Acidothermaceae	g__Acidothermus	s__unclassified_g__Acidothermus	ASV26767	5	4.09074e-6	0.03125
d__Bacteria	k__norank_d__Bacteria	p__Actinobacteriota	c__Actinobacteria	o__Frankiales	f__Acidothermaceae	g__Acidothermus	s__unclassified_g__Acidothermus	ASV29561	6	4.90889e-6	0.03125
d__Bacteria	k__norank_d__Bacteria	p__Actinobacteriota	c__Actinobacteria	o__Frankiales	f__Acidothermaceae	g__Acidothermus	s__unclassified_g__Acidothermus	ASV29563	4	3.27259e-6	0.03125
d__Bacteria	k__norank_d__Bacteria	p__Actinobacteriota	c__Actinobacteria	o__Frankiales	f__Acidothermaceae	g__Acidothermus	s__unclassified_g__Acidothermus	ASV29631	3	2.45445e-6	0.03125
d__Bacteria	k__norank_d__Bacteria	p__Actinobacteriota	c__Actinobacteria	o__Frankiales	f__Acidothermaceae	g__Acidothermus	s__unclassified_g__Acidothermus	ASV314	30	2.0E-5	0.0625
d__Bacteria	k__norank_d__Bacteria	p__Actinobacteriota	c__Actinobacteria	o__Frankiales	f__Acidothermaceae	g__Acidothermus	s__unclassified_g__Acidothermus	ASV503	79	6.0E-5	0.21875
d__Bacteria	k__norank_d__Bacteria	p__Actinobacteriota	c__Actinobacteria	o__Frankiales	f__Acidothermaceae	g__Acidothermus	s__uncultured_actinobacterium_g__Acidothermus	ASV454	193	0.00016	0.1875
d__Bacteria	k__norank_d__Bacteria	p__Actinobacteriota	c__Actinobacteria	o__Frankiales	f__Acidothermaceae	g__Acidothermus	s__uncultured_bacterium_g__Acidothermus	ASV20631	16	1.0E-5	0.03125
d__Bacteria	k__norank_d__Bacteria	p__Actinobacteriota	c__Actinobacteria	o__Frankiales	f__Acidothermaceae	g__Acidothermus	s__uncultured_bacterium_g__Acidothermus	ASV4486	7	5.72704e-6	0.03125
d__Bacteria	k__norank_d__Bacteria	p__Actinobacteriota	c__Actinobacteria	o__Frankiales	f__Cryptosporangiaceae	g__Cryptosporangium	s__unclassified_g__Cryptosporangium	ASV67	282	0.00023	0.3125
d__Bacteria	k__norank_d__Bacteria	p__Actinobacteriota	c__Actinobacteria	o__Frankiales	f__Cryptosporangiaceae	g__Cryptosporangium	s__unclassified_g__Cryptosporangium	ASV736	4	3.27259e-6	0.03125
d__Bacteria	k__norank_d__Bacteria	p__Actinobacteriota	c__Actinobacteria	o__Frankiales	f__Cryptosporangiaceae	g__Fodinicola	s__Fodinicola_feengrottensis	ASV62	139	0.00011	0.15625
d__Bacteria	k__norank_d__Bacteria	p__Actinobacteriota	c__Actinobacteria	o__Frankiales	f__Cryptosporangiaceae	g__Fodinicola	s__unclassified_g__Fodinicola	ASV1079	3	2.45445e-6	0.03125
d__Bacteria	k__norank_d__Bacteria	p__Actinobacteriota	c__Actinobacteria	o__Frankiales	f__Frankiaceae	g__Frankia	s__unclassified_g__Frankia	ASV21232	18	1.0E-5	0.03125
d__Bacteria	k__norank_d__Bacteria	p__Actinobacteriota	c__Actinobacteria	o__Frankiales	f__Frankiaceae	g__Jatrophihabitans	s__Frankiales_bacterium_g__Jatrophihabitans	ASV20714	6	4.90889e-6	0.03125
d__Bacteria	k__norank_d__Bacteria	p__Actinobacteriota	c__Actinobacteria	o__Frankiales	f__Frankiaceae	g__Jatrophihabitans	s__Frankiales_bacterium_g__Jatrophihabitans	ASV790	75	6.0E-5	0.28125
d__Bacteria	k__norank_d__Bacteria	p__Actinobacteriota	c__Actinobacteria	o__Frankiales	f__Frankiaceae	g__Jatrophihabitans	s__unclassified_g__Jatrophihabitans	ASV21423	9	7.36334e-6	0.03125
d__Bacteria	k__norank_d__Bacteria	p__Actinobacteriota	c__Actinobacteria	o__Frankiales	f__Frankiaceae	g__Jatrophihabitans	s__unclassified_g__Jatrophihabitans	ASV26498	14	1.0E-5	0.03125
d__Bacteria	k__norank_d__Bacteria	p__Actinobacteriota	c__Actinobacteria	o__Frankiales	f__Frankiaceae	g__Jatrophihabitans	s__unclassified_g__Jatrophihabitans	ASV29250	4	3.27259e-6	0.03125
d__Bacteria	k__norank_d__Bacteria	p__Actinobacteriota	c__Actinobacteria	o__Frankiales	f__Frankiaceae	g__Jatrophihabitans	s__unclassified_g__Jatrophihabitans	ASV29798	2	1.6363e-6	0.03125
d__Bacteria	k__norank_d__Bacteria	p__Actinobacteriota	c__Actinobacteria	o__Frankiales	f__Frankiaceae	g__Jatrophihabitans	s__unclassified_g__Jatrophihabitans	ASV4675	41	3.0E-5	0.15625
d__Bacteria	k__norank_d__Bacteria	p__Actinobacteriota	c__Actinobacteria	o__Frankiales	f__Frankiaceae	g__Jatrophihabitans	s__unclassified_g__Jatrophihabitans	ASV4817	12	9.81778e-6	0.0625
d__Bacteria	k__norank_d__Bacteria	p__Actinobacteriota	c__Actinobacteria	o__Frankiales	f__Frankiaceae	g__Jatrophihabitans	s__unclassified_g__Jatrophihabitans	ASV7580	7	5.72704e-6	0.03125
d__Bacteria	k__norank_d__Bacteria	p__Actinobacteriota	c__Actinobacteria	o__Frankiales	f__Frankiaceae	g__unclassified_f__Frankiaceae	s__unclassified_f__Frankiaceae	ASV1837	26	2.0E-5	0.03125
d__Bacteria	k__norank_d__Bacteria	p__Actinobacteriota	c__Actinobacteria	o__Frankiales	f__Geodermatophilaceae	g__Antricoccus	s__unclassified_g__Antricoccus	ASV1695	18	1.0E-5	0.15625
d__Bacteria	k__norank_d__Bacteria	p__Actinobacteriota	c__Actinobacteria	o__Frankiales	f__Geodermatophilaceae	g__Antricoccus	s__unclassified_g__Antricoccus	ASV23337	5	4.09074e-6	0.03125
d__Bacteria	k__norank_d__Bacteria	p__Actinobacteriota	c__Actinobacteria	o__Frankiales	f__Geodermatophilaceae	g__Antricoccus	s__unclassified_g__Antricoccus	ASV23475	4	3.27259e-6	0.03125
d__Bacteria	k__norank_d__Bacteria	p__Actinobacteriota	c__Actinobacteria	o__Frankiales	f__Geodermatophilaceae	g__Blastococcus	s__unclassified_g__Blastococcus	ASV1441	14	1.0E-5	0.03125
d__Bacteria	k__norank_d__Bacteria	p__Actinobacteriota	c__Actinobacteria	o__Frankiales	f__Geodermatophilaceae	g__Blastococcus	s__unclassified_g__Blastococcus	ASV1461	38	3.0E-5	0.0625
d__Bacteria	k__norank_d__Bacteria	p__Actinobacteriota	c__Actinobacteria	o__Frankiales	f__Geodermatophilaceae	g__Blastococcus	s__unclassified_g__Blastococcus	ASV20074	3	2.45445e-6	0.03125
d__Bacteria	k__norank_d__Bacteria	p__Actinobacteriota	c__Actinobacteria	o__Frankiales	f__Geodermatophilaceae	g__Blastococcus	s__unclassified_g__Blastococcus	ASV20676	12	9.81778e-6	0.03125
d__Bacteria	k__norank_d__Bacteria	p__Actinobacteriota	c__Actinobacteria	o__Frankiales	f__Geodermatophilaceae	g__Blastococcus	s__unclassified_g__Blastococcus	ASV210	30	2.0E-5	0.03125
d__Bacteria	k__norank_d__Bacteria	p__Actinobacteriota	c__Actinobacteria	o__Frankiales	f__Geodermatophilaceae	g__Blastococcus	s__unclassified_g__Blastococcus	ASV21420	6	4.90889e-6	0.03125
d__Bacteria	k__norank_d__Bacteria	p__Actinobacteriota	c__Actinobacteria	o__Frankiales	f__Geodermatophilaceae	g__Blastococcus	s__unclassified_g__Blastococcus	ASV22349	10	8.18148e-6	0.03125
d__Bacteria	k__norank_d__Bacteria	p__Actinobacteriota	c__Actinobacteria	o__Frankiales	f__Geodermatophilaceae	g__Blastococcus	s__unclassified_g__Blastococcus	ASV2374	15	1.0E-5	0.03125
d__Bacteria	k__norank_d__Bacteria	p__Actinobacteriota	c__Actinobacteria	o__Frankiales	f__Geodermatophilaceae	g__Blastococcus	s__unclassified_g__Blastococcus	ASV25813	6	4.90889e-6	0.03125
d__Bacteria	k__norank_d__Bacteria	p__Actinobacteriota	c__Actinobacteria	o__Frankiales	f__Geodermatophilaceae	g__Blastococcus	s__unclassified_g__Blastococcus	ASV25885	3	2.45445e-6	0.03125
d__Bacteria	k__norank_d__Bacteria	p__Actinobacteriota	c__Actinobacteria	o__Frankiales	f__Geodermatophilaceae	g__Blastococcus	s__unclassified_g__Blastococcus	ASV26649	4	3.27259e-6	0.03125
d__Bacteria	k__norank_d__Bacteria	p__Actinobacteriota	c__Actinobacteria	o__Frankiales	f__Geodermatophilaceae	g__Blastococcus	s__unclassified_g__Blastococcus	ASV27235	1	8.18148e-7	0.03125
d__Bacteria	k__norank_d__Bacteria	p__Actinobacteriota	c__Actinobacteria	o__Frankiales	f__Geodermatophilaceae	g__Blastococcus	s__unclassified_g__Blastococcus	ASV28269	18	1.0E-5	0.03125
d__Bacteria	k__norank_d__Bacteria	p__Actinobacteriota	c__Actinobacteria	o__Frankiales	f__Geodermatophilaceae	g__Blastococcus	s__unclassified_g__Blastococcus	ASV28449	1	8.18148e-7	0.03125
d__Bacteria	k__norank_d__Bacteria	p__Actinobacteriota	c__Actinobacteria	o__Frankiales	f__Geodermatophilaceae	g__Blastococcus	s__unclassified_g__Blastococcus	ASV29338	2	1.6363e-6	0.03125
d__Bacteria	k__norank_d__Bacteria	p__Actinobacteriota	c__Actinobacteria	o__Frankiales	f__Geodermatophilaceae	g__Blastococcus	s__unclassified_g__Blastococcus	ASV29660	4	3.27259e-6	0.03125
d__Bacteria	k__norank_d__Bacteria	p__Actinobacteriota	c__Actinobacteria	o__Frankiales	f__Geodermatophilaceae	g__Blastococcus	s__unclassified_g__Blastococcus	ASV3039	243	0.0002	0.25
d__Bacteria	k__norank_d__Bacteria	p__Actinobacteriota	c__Actinobacteria	o__Frankiales	f__Geodermatophilaceae	g__Blastococcus	s__unclassified_g__Blastococcus	ASV3064	36	3.0E-5	0.03125
d__Bacteria	k__norank_d__Bacteria	p__Actinobacteriota	c__Actinobacteria	o__Frankiales	f__Geodermatophilaceae	g__Blastococcus	s__unclassified_g__Blastococcus	ASV4405	18	1.0E-5	0.0625
d__Bacteria	k__norank_d__Bacteria	p__Actinobacteriota	c__Actinobacteria	o__Frankiales	f__Geodermatophilaceae	g__Blastococcus	s__unclassified_g__Blastococcus	ASV4613	6	4.90889e-6	0.03125
d__Bacteria	k__norank_d__Bacteria	p__Actinobacteriota	c__Actinobacteria	o__Frankiales	f__Geodermatophilaceae	g__Blastococcus	s__unclassified_g__Blastococcus	ASV4976	120	0.0001	0.125
d__Bacteria	k__norank_d__Bacteria	p__Actinobacteriota	c__Actinobacteria	o__Frankiales	f__Geodermatophilaceae	g__Blastococcus	s__unclassified_g__Blastococcus	ASV5021	53	4.0E-5	0.125
d__Bacteria	k__norank_d__Bacteria	p__Actinobacteriota	c__Actinobacteria	o__Frankiales	f__Geodermatophilaceae	g__Blastococcus	s__unclassified_g__Blastococcus	ASV523	10	8.18148e-6	0.03125
d__Bacteria	k__norank_d__Bacteria	p__Actinobacteriota	c__Actinobacteria	o__Frankiales	f__Geodermatophilaceae	g__Blastococcus	s__unclassified_g__Blastococcus	ASV6331	2	1.6363e-6	0.03125
d__Bacteria	k__norank_d__Bacteria	p__Actinobacteriota	c__Actinobacteria	o__Frankiales	f__Geodermatophilaceae	g__Blastococcus	s__unclassified_g__Blastococcus	ASV6605	8	6.54519e-6	0.03125
d__Bacteria	k__norank_d__Bacteria	p__Actinobacteriota	c__Actinobacteria	o__Frankiales	f__Geodermatophilaceae	g__Blastococcus	s__unclassified_g__Blastococcus	ASV6654	3	2.45445e-6	0.03125
d__Bacteria	k__norank_d__Bacteria	p__Actinobacteriota	c__Actinobacteria	o__Frankiales	f__Geodermatophilaceae	g__Blastococcus	s__unclassified_g__Blastococcus	ASV6832	53	4.0E-5	0.09375
d__Bacteria	k__norank_d__Bacteria	p__Actinobacteriota	c__Actinobacteria	o__Frankiales	f__Geodermatophilaceae	g__Blastococcus	s__unclassified_g__Blastococcus	ASV8550	60	5.0E-5	0.03125
d__Bacteria	k__norank_d__Bacteria	p__Actinobacteriota	c__Actinobacteria	o__Frankiales	f__Geodermatophilaceae	g__Geodermatophilus	s__unclassified_g__Geodermatophilus	ASV1705	14	1.0E-5	0.03125
d__Bacteria	k__norank_d__Bacteria	p__Actinobacteriota	c__Actinobacteria	o__Frankiales	f__Geodermatophilaceae	g__Geodermatophilus	s__unclassified_g__Geodermatophilus	ASV20578	49	4.0E-5	0.03125
d__Bacteria	k__norank_d__Bacteria	p__Actinobacteriota	c__Actinobacteria	o__Frankiales	f__Geodermatophilaceae	g__Geodermatophilus	s__unclassified_g__Geodermatophilus	ASV23250	11	8.99963e-6	0.03125
d__Bacteria	k__norank_d__Bacteria	p__Actinobacteriota	c__Actinobacteria	o__Frankiales	f__Geodermatophilaceae	g__Geodermatophilus	s__unclassified_g__Geodermatophilus	ASV3105	9	7.36334e-6	0.03125
d__Bacteria	k__norank_d__Bacteria	p__Actinobacteriota	c__Actinobacteria	o__Frankiales	f__Geodermatophilaceae	g__Geodermatophilus	s__unclassified_g__Geodermatophilus	ASV4307	24	2.0E-5	0.03125
d__Bacteria	k__norank_d__Bacteria	p__Actinobacteriota	c__Actinobacteria	o__Frankiales	f__Geodermatophilaceae	g__Geodermatophilus	s__unclassified_g__Geodermatophilus	ASV5024	145	0.00012	0.1875
d__Bacteria	k__norank_d__Bacteria	p__Actinobacteriota	c__Actinobacteria	o__Frankiales	f__Geodermatophilaceae	g__Geodermatophilus	s__unclassified_g__Geodermatophilus	ASV5689	4	3.27259e-6	0.03125
d__Bacteria	k__norank_d__Bacteria	p__Actinobacteriota	c__Actinobacteria	o__Frankiales	f__Geodermatophilaceae	g__Klenkia	s__unclassified_g__Klenkia	ASV20605	23	2.0E-5	0.03125
d__Bacteria	k__norank_d__Bacteria	p__Actinobacteriota	c__Actinobacteria	o__Frankiales	f__Geodermatophilaceae	g__Klenkia	s__unclassified_g__Klenkia	ASV4346	146	0.00012	0.125
d__Bacteria	k__norank_d__Bacteria	p__Actinobacteriota	c__Actinobacteria	o__Frankiales	f__Geodermatophilaceae	g__unclassified_f__Geodermatophilaceae	s__unclassified_f__Geodermatophilaceae	ASV1156	2	1.6363e-6	0.03125
d__Bacteria	k__norank_d__Bacteria	p__Actinobacteriota	c__Actinobacteria	o__Frankiales	f__Geodermatophilaceae	g__unclassified_f__Geodermatophilaceae	s__unclassified_f__Geodermatophilaceae	ASV20999	2	1.6363e-6	0.03125
d__Bacteria	k__norank_d__Bacteria	p__Actinobacteriota	c__Actinobacteria	o__Frankiales	f__Geodermatophilaceae	g__unclassified_f__Geodermatophilaceae	s__unclassified_f__Geodermatophilaceae	ASV21049	3	2.45445e-6	0.03125
d__Bacteria	k__norank_d__Bacteria	p__Actinobacteriota	c__Actinobacteria	o__Frankiales	f__Geodermatophilaceae	g__unclassified_f__Geodermatophilaceae	s__unclassified_f__Geodermatophilaceae	ASV21463	6	4.90889e-6	0.03125
d__Bacteria	k__norank_d__Bacteria	p__Actinobacteriota	c__Actinobacteria	o__Frankiales	f__Geodermatophilaceae	g__unclassified_f__Geodermatophilaceae	s__unclassified_f__Geodermatophilaceae	ASV21549	4	3.27259e-6	0.03125
d__Bacteria	k__norank_d__Bacteria	p__Actinobacteriota	c__Actinobacteria	o__Frankiales	f__Geodermatophilaceae	g__unclassified_f__Geodermatophilaceae	s__unclassified_f__Geodermatophilaceae	ASV26959	1	8.18148e-7	0.03125
d__Bacteria	k__norank_d__Bacteria	p__Actinobacteriota	c__Actinobacteria	o__Frankiales	f__Geodermatophilaceae	g__unclassified_f__Geodermatophilaceae	s__unclassified_f__Geodermatophilaceae	ASV29344	2	1.6363e-6	0.03125
d__Bacteria	k__norank_d__Bacteria	p__Actinobacteriota	c__Actinobacteria	o__Frankiales	f__Geodermatophilaceae	g__unclassified_f__Geodermatophilaceae	s__unclassified_f__Geodermatophilaceae	ASV29827	1	8.18148e-7	0.03125
d__Bacteria	k__norank_d__Bacteria	p__Actinobacteriota	c__Actinobacteria	o__Frankiales	f__Geodermatophilaceae	g__unclassified_f__Geodermatophilaceae	s__unclassified_f__Geodermatophilaceae	ASV6161	4	3.27259e-6	0.03125
d__Bacteria	k__norank_d__Bacteria	p__Actinobacteriota	c__Actinobacteria	o__Frankiales	f__Geodermatophilaceae	g__unclassified_f__Geodermatophilaceae	s__unclassified_f__Geodermatophilaceae	ASV6226	3	2.45445e-6	0.03125
d__Bacteria	k__norank_d__Bacteria	p__Actinobacteriota	c__Actinobacteria	o__Frankiales	f__Geodermatophilaceae	g__unclassified_f__Geodermatophilaceae	s__unclassified_f__Geodermatophilaceae	ASV7436	2	1.6363e-6	0.03125
d__Bacteria	k__norank_d__Bacteria	p__Actinobacteriota	c__Actinobacteria	o__Frankiales	f__Geodermatophilaceae	g__unclassified_f__Geodermatophilaceae	s__unclassified_f__Geodermatophilaceae	ASV806	4	3.27259e-6	0.03125
d__Bacteria	k__norank_d__Bacteria	p__Actinobacteriota	c__Actinobacteria	o__Frankiales	f__Geodermatophilaceae	g__unclassified_f__Geodermatophilaceae	s__unclassified_f__Geodermatophilaceae	ASV8957	2	1.6363e-6	0.03125
d__Bacteria	k__norank_d__Bacteria	p__Actinobacteriota	c__Actinobacteria	o__Frankiales	f__Geodermatophilaceae	g__unclassified_f__Geodermatophilaceae	s__unclassified_f__Geodermatophilaceae	ASV8976	2	1.6363e-6	0.03125
d__Bacteria	k__norank_d__Bacteria	p__Actinobacteriota	c__Actinobacteria	o__Frankiales	f__Nakamurellaceae	g__Nakamurella	s__unclassified_g__Nakamurella	ASV500	8	6.54519e-6	0.03125
d__Bacteria	k__norank_d__Bacteria	p__Actinobacteriota	c__Actinobacteria	o__Frankiales	f__Nakamurellaceae	g__Nakamurella	s__unclassified_g__Nakamurella	ASV856	2	1.6363e-6	0.03125
d__Bacteria	k__norank_d__Bacteria	p__Actinobacteriota	c__Actinobacteria	o__Frankiales	f__Nakamurellaceae	g__Nakamurella	s__uncultured_Nakamurellaceae_bacterium_g__Nakamurella	ASV7074	15	1.0E-5	0.03125
d__Bacteria	k__norank_d__Bacteria	p__Actinobacteriota	c__Actinobacteria	o__Frankiales	f__Nakamurellaceae	g__Nakamurella	s__uncultured_bacterium_g__Nakamurella	ASV8440	4	3.27259e-6	0.03125
d__Bacteria	k__norank_d__Bacteria	p__Actinobacteriota	c__Actinobacteria	o__Frankiales	f__Sporichthyaceae	g__Longivirga	s__uncultured_bacterium_g__Longivirga	ASV20019	2	1.6363e-6	0.03125
d__Bacteria	k__norank_d__Bacteria	p__Actinobacteriota	c__Actinobacteria	o__Frankiales	f__Sporichthyaceae	g__Sporichthya	s__unclassified_g__Sporichthya	ASV2480	33	3.0E-5	0.125
d__Bacteria	k__norank_d__Bacteria	p__Actinobacteriota	c__Actinobacteria	o__Frankiales	f__Sporichthyaceae	g__Sporichthya	s__unclassified_g__Sporichthya	ASV7422	2	1.6363e-6	0.03125
d__Bacteria	k__norank_d__Bacteria	p__Actinobacteriota	c__Actinobacteria	o__Frankiales	f__Sporichthyaceae	g__norank_f__Sporichthyaceae	s__unclassified_g__norank_f__Sporichthyaceae	ASV310	163	0.00013	0.25
d__Bacteria	k__norank_d__Bacteria	p__Actinobacteriota	c__Actinobacteria	o__Frankiales	f__Sporichthyaceae	g__norank_f__Sporichthyaceae	s__unclassified_g__norank_f__Sporichthyaceae	ASV4313	30	2.0E-5	0.0625
d__Bacteria	k__norank_d__Bacteria	p__Actinobacteriota	c__Actinobacteria	o__Frankiales	f__Sporichthyaceae	g__norank_f__Sporichthyaceae	s__unclassified_g__norank_f__Sporichthyaceae	ASV4772	41	3.0E-5	0.1875
d__Bacteria	k__norank_d__Bacteria	p__Actinobacteriota	c__Actinobacteria	o__Frankiales	f__Sporichthyaceae	g__norank_f__Sporichthyaceae	s__uncultured_Sporichthya_sp.	ASV1451	335	0.00027	0.375
d__Bacteria	k__norank_d__Bacteria	p__Actinobacteriota	c__Actinobacteria	o__Frankiales	f__Sporichthyaceae	g__norank_f__Sporichthyaceae	s__uncultured_Sporichthya_sp.	ASV23372	4	3.27259e-6	0.03125
d__Bacteria	k__norank_d__Bacteria	p__Actinobacteriota	c__Actinobacteria	o__Frankiales	f__Sporichthyaceae	g__norank_f__Sporichthyaceae	s__uncultured_bacterium_f__Sporichthyaceae	ASV726	336	0.00027	0.625
d__Bacteria	k__norank_d__Bacteria	p__Actinobacteriota	c__Actinobacteria	o__Frankiales	f__Sporichthyaceae	g__unclassified_f__Sporichthyaceae	s__unclassified_f__Sporichthyaceae	ASV6999	1	8.18148e-7	0.03125
d__Bacteria	k__norank_d__Bacteria	p__Actinobacteriota	c__Actinobacteria	o__Frankiales	f__norank_o__Frankiales	g__norank_o__Frankiales	s__unclassified_g__norank_o__Frankiales	ASV22913	1	8.18148e-7	0.03125
d__Bacteria	k__norank_d__Bacteria	p__Actinobacteriota	c__Actinobacteria	o__Frankiales	f__norank_o__Frankiales	g__norank_o__Frankiales	s__unclassified_g__norank_o__Frankiales	ASV29840	3	2.45445e-6	0.03125
d__Bacteria	k__norank_d__Bacteria	p__Actinobacteriota	c__Actinobacteria	o__Frankiales	f__norank_o__Frankiales	g__norank_o__Frankiales	s__unclassified_g__norank_o__Frankiales	ASV29863	2	1.6363e-6	0.03125
d__Bacteria	k__norank_d__Bacteria	p__Actinobacteriota	c__Actinobacteria	o__Frankiales	f__norank_o__Frankiales	g__norank_o__Frankiales	s__unclassified_g__norank_o__Frankiales	ASV4548	49	4.0E-5	0.15625
d__Bacteria	k__norank_d__Bacteria	p__Actinobacteriota	c__Actinobacteria	o__Frankiales	f__norank_o__Frankiales	g__norank_o__Frankiales	s__unclassified_g__norank_o__Frankiales	ASV6239	4	3.27259e-6	0.03125
d__Bacteria	k__norank_d__Bacteria	p__Actinobacteriota	c__Actinobacteria	o__Frankiales	f__norank_o__Frankiales	g__norank_o__Frankiales	s__unclassified_g__norank_o__Frankiales	ASV6457	1	8.18148e-7	0.03125
d__Bacteria	k__norank_d__Bacteria	p__Actinobacteriota	c__Actinobacteria	o__Frankiales	f__norank_o__Frankiales	g__norank_o__Frankiales	s__unclassified_g__norank_o__Frankiales	ASV680	19	2.0E-5	0.15625
d__Bacteria	k__norank_d__Bacteria	p__Actinobacteriota	c__Actinobacteria	o__Frankiales	f__norank_o__Frankiales	g__norank_o__Frankiales	s__unclassified_g__norank_o__Frankiales	ASV985	3	2.45445e-6	0.03125
d__Bacteria	k__norank_d__Bacteria	p__Actinobacteriota	c__Actinobacteria	o__Frankiales	f__unclassified_o__Frankiales	g__unclassified_o__Frankiales	s__unclassified_o__Frankiales	ASV1116	2	1.6363e-6	0.03125
d__Bacteria	k__norank_d__Bacteria	p__Actinobacteriota	c__Actinobacteria	o__Frankiales	f__unclassified_o__Frankiales	g__unclassified_o__Frankiales	s__unclassified_o__Frankiales	ASV21402	6	4.90889e-6	0.03125
d__Bacteria	k__norank_d__Bacteria	p__Actinobacteriota	c__Actinobacteria	o__Frankiales	f__unclassified_o__Frankiales	g__unclassified_o__Frankiales	s__unclassified_o__Frankiales	ASV22251	11	8.99963e-6	0.03125
d__Bacteria	k__norank_d__Bacteria	p__Actinobacteriota	c__Actinobacteria	o__Frankiales	f__unclassified_o__Frankiales	g__unclassified_o__Frankiales	s__unclassified_o__Frankiales	ASV22325	9	7.36334e-6	0.03125
d__Bacteria	k__norank_d__Bacteria	p__Actinobacteriota	c__Actinobacteria	o__Frankiales	f__unclassified_o__Frankiales	g__unclassified_o__Frankiales	s__unclassified_o__Frankiales	ASV26362	2	1.6363e-6	0.03125
d__Bacteria	k__norank_d__Bacteria	p__Actinobacteriota	c__Actinobacteria	o__Frankiales	f__unclassified_o__Frankiales	g__unclassified_o__Frankiales	s__unclassified_o__Frankiales	ASV29378	101	8.0E-5	0.03125
d__Bacteria	k__norank_d__Bacteria	p__Actinobacteriota	c__Actinobacteria	o__Frankiales	f__unclassified_o__Frankiales	g__unclassified_o__Frankiales	s__unclassified_o__Frankiales	ASV3222	63	5.0E-5	0.09375
d__Bacteria	k__norank_d__Bacteria	p__Actinobacteriota	c__Actinobacteria	o__Frankiales	f__unclassified_o__Frankiales	g__unclassified_o__Frankiales	s__unclassified_o__Frankiales	ASV4337	32	3.0E-5	0.09375
d__Bacteria	k__norank_d__Bacteria	p__Actinobacteriota	c__Actinobacteria	o__Frankiales	f__unclassified_o__Frankiales	g__unclassified_o__Frankiales	s__unclassified_o__Frankiales	ASV7573	6	4.90889e-6	0.0625
d__Bacteria	k__norank_d__Bacteria	p__Actinobacteriota	c__Actinobacteria	o__Glycomycetales	f__Glycomycetaceae	g__Glycomyces	s__unclassified_g__Glycomyces	ASV20635	15	1.0E-5	0.03125
d__Bacteria	k__norank_d__Bacteria	p__Actinobacteriota	c__Actinobacteria	o__Glycomycetales	f__Glycomycetaceae	g__Glycomyces	s__unclassified_g__Glycomyces	ASV2879	51	4.0E-5	0.21875
d__Bacteria	k__norank_d__Bacteria	p__Actinobacteriota	c__Actinobacteria	o__Glycomycetales	f__Glycomycetaceae	g__Glycomyces	s__unclassified_g__Glycomyces	ASV815	26	2.0E-5	0.09375
d__Bacteria	k__norank_d__Bacteria	p__Actinobacteriota	c__Actinobacteria	o__Kineosporiales	f__Kineosporiaceae	g__Angustibacter	s__unclassified_g__Angustibacter	ASV26682	5	4.09074e-6	0.03125
d__Bacteria	k__norank_d__Bacteria	p__Actinobacteriota	c__Actinobacteria	o__Kineosporiales	f__Kineosporiaceae	g__Angustibacter	s__unclassified_g__Angustibacter	ASV8979	3	2.45445e-6	0.0625
d__Bacteria	k__norank_d__Bacteria	p__Actinobacteriota	c__Actinobacteria	o__Kineosporiales	f__Kineosporiaceae	g__Angustibacter	s__uncultured_bacterium_g__Angustibacter	ASV7518	107	9.0E-5	0.125
d__Bacteria	k__norank_d__Bacteria	p__Actinobacteriota	c__Actinobacteria	o__Kineosporiales	f__Kineosporiaceae	g__Kineococcus	s__unclassified_g__Kineococcus	ASV29791	3	2.45445e-6	0.03125
d__Bacteria	k__norank_d__Bacteria	p__Actinobacteriota	c__Actinobacteria	o__Kineosporiales	f__Kineosporiaceae	g__Kineosporia	s__unclassified_g__Kineosporia	ASV20650	11	8.99963e-6	0.03125
d__Bacteria	k__norank_d__Bacteria	p__Actinobacteriota	c__Actinobacteria	o__Kineosporiales	f__Kineosporiaceae	g__Kineosporia	s__unclassified_g__Kineosporia	ASV4663	3	2.45445e-6	0.03125
d__Bacteria	k__norank_d__Bacteria	p__Actinobacteriota	c__Actinobacteria	o__Kineosporiales	f__Kineosporiaceae	g__Quadrisphaera	s__Cellulomonas_sp._NII-1013	ASV29534	9	7.36334e-6	0.03125
d__Bacteria	k__norank_d__Bacteria	p__Actinobacteriota	c__Actinobacteria	o__Kineosporiales	f__Kineosporiaceae	g__Quadrisphaera	s__uncultured_Kineococcus_sp._g__Quadrisphaera	ASV771	5	4.09074e-6	0.03125
d__Bacteria	k__norank_d__Bacteria	p__Actinobacteriota	c__Actinobacteria	o__Kineosporiales	f__Kineosporiaceae	g__Quadrisphaera	s__uncultured_actinobacterium_g__Quadrisphaera	ASV7018	1	8.18148e-7	0.03125
d__Bacteria	k__norank_d__Bacteria	p__Actinobacteriota	c__Actinobacteria	o__Kineosporiales	f__Kineosporiaceae	g__norank_f__Kineosporiaceae	s__uncultured_bacterium_f__Kineosporiaceae	ASV2084	32	3.0E-5	0.125
d__Bacteria	k__norank_d__Bacteria	p__Actinobacteriota	c__Actinobacteria	o__Kineosporiales	f__Kineosporiaceae	g__norank_f__Kineosporiaceae	s__uncultured_bacterium_f__Kineosporiaceae	ASV21313	12	9.81778e-6	0.03125
d__Bacteria	k__norank_d__Bacteria	p__Actinobacteriota	c__Actinobacteria	o__Kineosporiales	f__Kineosporiaceae	g__norank_f__Kineosporiaceae	s__uncultured_bacterium_f__Kineosporiaceae	ASV23429	5	4.09074e-6	0.03125
d__Bacteria	k__norank_d__Bacteria	p__Actinobacteriota	c__Actinobacteria	o__Kineosporiales	f__Kineosporiaceae	g__unclassified_f__Kineosporiaceae	s__unclassified_f__Kineosporiaceae	ASV29433	12	9.81778e-6	0.03125
d__Bacteria	k__norank_d__Bacteria	p__Actinobacteriota	c__Actinobacteria	o__Kineosporiales	f__Kineosporiaceae	g__unclassified_f__Kineosporiaceae	s__unclassified_f__Kineosporiaceae	ASV426	18	1.0E-5	0.0625
d__Bacteria	k__norank_d__Bacteria	p__Actinobacteriota	c__Actinobacteria	o__Micrococcales	f__Beutenbergiaceae	g__Salana	s__uncultured_bacterium_g__Salana	ASV29589	4	3.27259e-6	0.03125
d__Bacteria	k__norank_d__Bacteria	p__Actinobacteriota	c__Actinobacteria	o__Micrococcales	f__Cellulomonadaceae	g__Actinotalea	s__unclassified_g__Actinotalea	ASV689	70	6.0E-5	0.125
d__Bacteria	k__norank_d__Bacteria	p__Actinobacteriota	c__Actinobacteria	o__Micrococcales	f__Cellulomonadaceae	g__Cellulomonas	s__Isoptericola_sp._g__Cellulomonas	ASV667	21	2.0E-5	0.09375
d__Bacteria	k__norank_d__Bacteria	p__Actinobacteriota	c__Actinobacteria	o__Micrococcales	f__Cellulomonadaceae	g__Cellulomonas	s__unclassified_g__Cellulomonas	ASV20719	7	5.72704e-6	0.03125
d__Bacteria	k__norank_d__Bacteria	p__Actinobacteriota	c__Actinobacteria	o__Micrococcales	f__Cellulomonadaceae	g__Cellulomonas	s__unclassified_g__Cellulomonas	ASV4463	10	8.18148e-6	0.03125
d__Bacteria	k__norank_d__Bacteria	p__Actinobacteriota	c__Actinobacteria	o__Micrococcales	f__Cellulomonadaceae	g__Cellulomonas	s__unclassified_g__Cellulomonas	ASV5760	2	1.6363e-6	0.03125
d__Bacteria	k__norank_d__Bacteria	p__Actinobacteriota	c__Actinobacteria	o__Micrococcales	f__Cellulomonadaceae	g__Cellulomonas	s__unclassified_g__Cellulomonas	ASV613	7	5.72704e-6	0.03125
d__Bacteria	k__norank_d__Bacteria	p__Actinobacteriota	c__Actinobacteria	o__Micrococcales	f__Cellulomonadaceae	g__Cellulomonas	s__unclassified_g__Cellulomonas	ASV7544	8	6.54519e-6	0.03125
d__Bacteria	k__norank_d__Bacteria	p__Actinobacteriota	c__Actinobacteria	o__Micrococcales	f__Cellulomonadaceae	g__unclassified_f__Cellulomonadaceae	s__unclassified_f__Cellulomonadaceae	ASV8762	2	1.6363e-6	0.03125
d__Bacteria	k__norank_d__Bacteria	p__Actinobacteriota	c__Actinobacteria	o__Micrococcales	f__Dermacoccaceae	g__Branchiibius	s__Branchiibius_cervicis	ASV8575	24	2.0E-5	0.03125
d__Bacteria	k__norank_d__Bacteria	p__Actinobacteriota	c__Actinobacteria	o__Micrococcales	f__Dermacoccaceae	g__Branchiibius	s__unclassified_g__Branchiibius	ASV676	70	6.0E-5	0.25
d__Bacteria	k__norank_d__Bacteria	p__Actinobacteriota	c__Actinobacteria	o__Micrococcales	f__Dermacoccaceae	g__Flexivirga	s__unclassified_g__Flexivirga	ASV20559	1	8.18148e-7	0.03125
d__Bacteria	k__norank_d__Bacteria	p__Actinobacteriota	c__Actinobacteria	o__Micrococcales	f__Dermacoccaceae	g__Luteipulveratus	s__unclassified_g__Luteipulveratus	ASV8882	4	3.27259e-6	0.03125
d__Bacteria	k__norank_d__Bacteria	p__Actinobacteriota	c__Actinobacteria	o__Micrococcales	f__Intrasporangiaceae	g__Intrasporangium	s__unclassified_g__Intrasporangium	ASV1503	447	0.00037	0.4375
d__Bacteria	k__norank_d__Bacteria	p__Actinobacteriota	c__Actinobacteria	o__Micrococcales	f__Intrasporangiaceae	g__Intrasporangium	s__unclassified_g__Intrasporangium	ASV1943	29	2.0E-5	0.125
d__Bacteria	k__norank_d__Bacteria	p__Actinobacteriota	c__Actinobacteria	o__Micrococcales	f__Intrasporangiaceae	g__Intrasporangium	s__unclassified_g__Intrasporangium	ASV22217	15	1.0E-5	0.03125
d__Bacteria	k__norank_d__Bacteria	p__Actinobacteriota	c__Actinobacteria	o__Micrococcales	f__Intrasporangiaceae	g__Intrasporangium	s__unclassified_g__Intrasporangium	ASV23218	19	2.0E-5	0.03125
d__Bacteria	k__norank_d__Bacteria	p__Actinobacteriota	c__Actinobacteria	o__Micrococcales	f__Intrasporangiaceae	g__Intrasporangium	s__unclassified_g__Intrasporangium	ASV26704	4	3.27259e-6	0.03125
d__Bacteria	k__norank_d__Bacteria	p__Actinobacteriota	c__Actinobacteria	o__Micrococcales	f__Intrasporangiaceae	g__Intrasporangium	s__unclassified_g__Intrasporangium	ASV6914	3	2.45445e-6	0.03125
d__Bacteria	k__norank_d__Bacteria	p__Actinobacteriota	c__Actinobacteria	o__Micrococcales	f__Intrasporangiaceae	g__Janibacter	s__unclassified_g__Janibacter	ASV22573	3	2.45445e-6	0.03125
d__Bacteria	k__norank_d__Bacteria	p__Actinobacteriota	c__Actinobacteria	o__Micrococcales	f__Intrasporangiaceae	g__Janibacter	s__unclassified_g__Janibacter	ASV25833	4	3.27259e-6	0.03125
d__Bacteria	k__norank_d__Bacteria	p__Actinobacteriota	c__Actinobacteria	o__Micrococcales	f__Intrasporangiaceae	g__Knoellia	s__unclassified_g__Knoellia	ASV5605	10	8.18148e-6	0.03125
d__Bacteria	k__norank_d__Bacteria	p__Actinobacteriota	c__Actinobacteria	o__Micrococcales	f__Intrasporangiaceae	g__Lapillicoccus	s__unclassified_g__Lapillicoccus	ASV26072	3	2.45445e-6	0.03125
d__Bacteria	k__norank_d__Bacteria	p__Actinobacteriota	c__Actinobacteria	o__Micrococcales	f__Intrasporangiaceae	g__Lapillicoccus	s__unclassified_g__Lapillicoccus	ASV315	150	0.00012	0.25
d__Bacteria	k__norank_d__Bacteria	p__Actinobacteriota	c__Actinobacteria	o__Micrococcales	f__Intrasporangiaceae	g__Lapillicoccus	s__unclassified_g__Lapillicoccus	ASV375	421	0.00034	0.59375
d__Bacteria	k__norank_d__Bacteria	p__Actinobacteriota	c__Actinobacteria	o__Micrococcales	f__Intrasporangiaceae	g__Lapillicoccus	s__unclassified_g__Lapillicoccus	ASV5903	17	1.0E-5	0.03125
d__Bacteria	k__norank_d__Bacteria	p__Actinobacteriota	c__Actinobacteria	o__Micrococcales	f__Intrasporangiaceae	g__Ornithinicoccus	s__uncultured_compost_bacterium_g__Ornithinicoccus	ASV4348	50	4.0E-5	0.0625
d__Bacteria	k__norank_d__Bacteria	p__Actinobacteriota	c__Actinobacteria	o__Micrococcales	f__Intrasporangiaceae	g__Ornithinimicrobium	s__unclassified_g__Ornithinimicrobium	ASV20543	1	8.18148e-7	0.03125
d__Bacteria	k__norank_d__Bacteria	p__Actinobacteriota	c__Actinobacteria	o__Micrococcales	f__Intrasporangiaceae	g__Phycicoccus	s__Phycicoccus_jejuensis	ASV21498	5	4.09074e-6	0.03125
d__Bacteria	k__norank_d__Bacteria	p__Actinobacteriota	c__Actinobacteria	o__Micrococcales	f__Intrasporangiaceae	g__Phycicoccus	s__Phycicoccus_jejuensis	ASV25923	2	1.6363e-6	0.03125
d__Bacteria	k__norank_d__Bacteria	p__Actinobacteriota	c__Actinobacteria	o__Micrococcales	f__Intrasporangiaceae	g__Phycicoccus	s__unclassified_g__Phycicoccus	ASV1390	257	0.00021	0.40625
d__Bacteria	k__norank_d__Bacteria	p__Actinobacteriota	c__Actinobacteria	o__Micrococcales	f__Intrasporangiaceae	g__Phycicoccus	s__unclassified_g__Phycicoccus	ASV1435	360	0.00029	0.625
d__Bacteria	k__norank_d__Bacteria	p__Actinobacteriota	c__Actinobacteria	o__Micrococcales	f__Intrasporangiaceae	g__Phycicoccus	s__unclassified_g__Phycicoccus	ASV28337	5	4.09074e-6	0.03125
d__Bacteria	k__norank_d__Bacteria	p__Actinobacteriota	c__Actinobacteria	o__Micrococcales	f__Intrasporangiaceae	g__Phycicoccus	s__unclassified_g__Phycicoccus	ASV28389	3	2.45445e-6	0.03125
d__Bacteria	k__norank_d__Bacteria	p__Actinobacteriota	c__Actinobacteria	o__Micrococcales	f__Intrasporangiaceae	g__Phycicoccus	s__unclassified_g__Phycicoccus	ASV29604	6	4.90889e-6	0.03125
d__Bacteria	k__norank_d__Bacteria	p__Actinobacteriota	c__Actinobacteria	o__Micrococcales	f__Intrasporangiaceae	g__Phycicoccus	s__unclassified_g__Phycicoccus	ASV541	78	6.0E-5	0.125
d__Bacteria	k__norank_d__Bacteria	p__Actinobacteriota	c__Actinobacteria	o__Micrococcales	f__Intrasporangiaceae	g__Phycicoccus	s__unclassified_g__Phycicoccus	ASV6118	3	2.45445e-6	0.03125
d__Bacteria	k__norank_d__Bacteria	p__Actinobacteriota	c__Actinobacteria	o__Micrococcales	f__Intrasporangiaceae	g__Phycicoccus	s__unclassified_g__Phycicoccus	ASV7365	3	2.45445e-6	0.03125
d__Bacteria	k__norank_d__Bacteria	p__Actinobacteriota	c__Actinobacteria	o__Micrococcales	f__Intrasporangiaceae	g__Terrabacter	s__unclassified_g__Terrabacter	ASV173	587	0.00048	0.4375
d__Bacteria	k__norank_d__Bacteria	p__Actinobacteriota	c__Actinobacteria	o__Micrococcales	f__Intrasporangiaceae	g__Terrabacter	s__unclassified_g__Terrabacter	ASV20049	3	2.45445e-6	0.03125
d__Bacteria	k__norank_d__Bacteria	p__Actinobacteriota	c__Actinobacteria	o__Micrococcales	f__Intrasporangiaceae	g__Terrabacter	s__unclassified_g__Terrabacter	ASV23293	12	9.81778e-6	0.03125
d__Bacteria	k__norank_d__Bacteria	p__Actinobacteriota	c__Actinobacteria	o__Micrococcales	f__Intrasporangiaceae	g__Terrabacter	s__unclassified_g__Terrabacter	ASV258	301	0.00025	0.375
d__Bacteria	k__norank_d__Bacteria	p__Actinobacteriota	c__Actinobacteria	o__Micrococcales	f__Intrasporangiaceae	g__Terrabacter	s__unclassified_g__Terrabacter	ASV29210	4	3.27259e-6	0.03125
d__Bacteria	k__norank_d__Bacteria	p__Actinobacteriota	c__Actinobacteria	o__Micrococcales	f__Intrasporangiaceae	g__Terrabacter	s__unclassified_g__Terrabacter	ASV32558	4	3.27259e-6	0.03125
d__Bacteria	k__norank_d__Bacteria	p__Actinobacteriota	c__Actinobacteria	o__Micrococcales	f__Intrasporangiaceae	g__Terrabacter	s__unclassified_g__Terrabacter	ASV5559	84	7.0E-5	0.09375
d__Bacteria	k__norank_d__Bacteria	p__Actinobacteriota	c__Actinobacteria	o__Micrococcales	f__Intrasporangiaceae	g__Terrabacter	s__unclassified_g__Terrabacter	ASV6032	7	5.72704e-6	0.03125
d__Bacteria	k__norank_d__Bacteria	p__Actinobacteriota	c__Actinobacteria	o__Micrococcales	f__Intrasporangiaceae	g__Terrabacter	s__unclassified_g__Terrabacter	ASV6265	4	3.27259e-6	0.03125
d__Bacteria	k__norank_d__Bacteria	p__Actinobacteriota	c__Actinobacteria	o__Micrococcales	f__Intrasporangiaceae	g__Terrabacter	s__unclassified_g__Terrabacter	ASV7440	2	1.6363e-6	0.03125
d__Bacteria	k__norank_d__Bacteria	p__Actinobacteriota	c__Actinobacteria	o__Micrococcales	f__Intrasporangiaceae	g__norank_f__Intrasporangiaceae	s__uncultured_bacterium_f__Intrasporangiaceae	ASV21380	8	6.54519e-6	0.03125
d__Bacteria	k__norank_d__Bacteria	p__Actinobacteriota	c__Actinobacteria	o__Micrococcales	f__Intrasporangiaceae	g__unclassified_f__Intrasporangiaceae	s__unclassified_f__Intrasporangiaceae	ASV1577	8	6.54519e-6	0.03125
d__Bacteria	k__norank_d__Bacteria	p__Actinobacteriota	c__Actinobacteria	o__Micrococcales	f__Intrasporangiaceae	g__unclassified_f__Intrasporangiaceae	s__unclassified_f__Intrasporangiaceae	ASV1742	14	1.0E-5	0.03125
d__Bacteria	k__norank_d__Bacteria	p__Actinobacteriota	c__Actinobacteria	o__Micrococcales	f__Intrasporangiaceae	g__unclassified_f__Intrasporangiaceae	s__unclassified_f__Intrasporangiaceae	ASV21050	2	1.6363e-6	0.03125
d__Bacteria	k__norank_d__Bacteria	p__Actinobacteriota	c__Actinobacteria	o__Micrococcales	f__Intrasporangiaceae	g__unclassified_f__Intrasporangiaceae	s__unclassified_f__Intrasporangiaceae	ASV21214	20	2.0E-5	0.03125
d__Bacteria	k__norank_d__Bacteria	p__Actinobacteriota	c__Actinobacteria	o__Micrococcales	f__Intrasporangiaceae	g__unclassified_f__Intrasporangiaceae	s__unclassified_f__Intrasporangiaceae	ASV21504	5	4.09074e-6	0.03125
d__Bacteria	k__norank_d__Bacteria	p__Actinobacteriota	c__Actinobacteria	o__Micrococcales	f__Intrasporangiaceae	g__unclassified_f__Intrasporangiaceae	s__unclassified_f__Intrasporangiaceae	ASV21753	1	8.18148e-7	0.03125
d__Bacteria	k__norank_d__Bacteria	p__Actinobacteriota	c__Actinobacteria	o__Micrococcales	f__Intrasporangiaceae	g__unclassified_f__Intrasporangiaceae	s__unclassified_f__Intrasporangiaceae	ASV22348	7	5.72704e-6	0.03125
d__Bacteria	k__norank_d__Bacteria	p__Actinobacteriota	c__Actinobacteria	o__Micrococcales	f__Intrasporangiaceae	g__unclassified_f__Intrasporangiaceae	s__unclassified_f__Intrasporangiaceae	ASV22685	3	2.45445e-6	0.03125
d__Bacteria	k__norank_d__Bacteria	p__Actinobacteriota	c__Actinobacteria	o__Micrococcales	f__Intrasporangiaceae	g__unclassified_f__Intrasporangiaceae	s__unclassified_f__Intrasporangiaceae	ASV25881	3	2.45445e-6	0.03125
d__Bacteria	k__norank_d__Bacteria	p__Actinobacteriota	c__Actinobacteria	o__Micrococcales	f__Intrasporangiaceae	g__unclassified_f__Intrasporangiaceae	s__unclassified_f__Intrasporangiaceae	ASV26011	6	4.90889e-6	0.03125
d__Bacteria	k__norank_d__Bacteria	p__Actinobacteriota	c__Actinobacteria	o__Micrococcales	f__Intrasporangiaceae	g__unclassified_f__Intrasporangiaceae	s__unclassified_f__Intrasporangiaceae	ASV26302	1	8.18148e-7	0.03125
d__Bacteria	k__norank_d__Bacteria	p__Actinobacteriota	c__Actinobacteria	o__Micrococcales	f__Intrasporangiaceae	g__unclassified_f__Intrasporangiaceae	s__unclassified_f__Intrasporangiaceae	ASV26327	1	8.18148e-7	0.03125
d__Bacteria	k__norank_d__Bacteria	p__Actinobacteriota	c__Actinobacteria	o__Micrococcales	f__Intrasporangiaceae	g__unclassified_f__Intrasporangiaceae	s__unclassified_f__Intrasporangiaceae	ASV26357	2	1.6363e-6	0.03125
d__Bacteria	k__norank_d__Bacteria	p__Actinobacteriota	c__Actinobacteria	o__Micrococcales	f__Intrasporangiaceae	g__unclassified_f__Intrasporangiaceae	s__unclassified_f__Intrasporangiaceae	ASV26467	15	1.0E-5	0.03125
d__Bacteria	k__norank_d__Bacteria	p__Actinobacteriota	c__Actinobacteria	o__Micrococcales	f__Intrasporangiaceae	g__unclassified_f__Intrasporangiaceae	s__unclassified_f__Intrasporangiaceae	ASV28425	2	1.6363e-6	0.03125
d__Bacteria	k__norank_d__Bacteria	p__Actinobacteriota	c__Actinobacteria	o__Micrococcales	f__Intrasporangiaceae	g__unclassified_f__Intrasporangiaceae	s__unclassified_f__Intrasporangiaceae	ASV3248	6	4.90889e-6	0.03125
d__Bacteria	k__norank_d__Bacteria	p__Actinobacteriota	c__Actinobacteria	o__Micrococcales	f__Intrasporangiaceae	g__unclassified_f__Intrasporangiaceae	s__unclassified_f__Intrasporangiaceae	ASV342	18	1.0E-5	0.03125
d__Bacteria	k__norank_d__Bacteria	p__Actinobacteriota	c__Actinobacteria	o__Micrococcales	f__Intrasporangiaceae	g__unclassified_f__Intrasporangiaceae	s__unclassified_f__Intrasporangiaceae	ASV4707	4	3.27259e-6	0.03125
d__Bacteria	k__norank_d__Bacteria	p__Actinobacteriota	c__Actinobacteria	o__Micrococcales	f__Intrasporangiaceae	g__unclassified_f__Intrasporangiaceae	s__unclassified_f__Intrasporangiaceae	ASV4995	55	4.0E-5	0.09375
d__Bacteria	k__norank_d__Bacteria	p__Actinobacteriota	c__Actinobacteria	o__Micrococcales	f__Intrasporangiaceae	g__unclassified_f__Intrasporangiaceae	s__unclassified_f__Intrasporangiaceae	ASV520	30	2.0E-5	0.09375
d__Bacteria	k__norank_d__Bacteria	p__Actinobacteriota	c__Actinobacteria	o__Micrococcales	f__Intrasporangiaceae	g__unclassified_f__Intrasporangiaceae	s__unclassified_f__Intrasporangiaceae	ASV5678	4	3.27259e-6	0.03125
d__Bacteria	k__norank_d__Bacteria	p__Actinobacteriota	c__Actinobacteria	o__Micrococcales	f__Intrasporangiaceae	g__unclassified_f__Intrasporangiaceae	s__unclassified_f__Intrasporangiaceae	ASV7317	4	3.27259e-6	0.03125
d__Bacteria	k__norank_d__Bacteria	p__Actinobacteriota	c__Actinobacteria	o__Micrococcales	f__Intrasporangiaceae	g__unclassified_f__Intrasporangiaceae	s__unclassified_f__Intrasporangiaceae	ASV7686	6	4.90889e-6	0.03125
d__Bacteria	k__norank_d__Bacteria	p__Actinobacteriota	c__Actinobacteria	o__Micrococcales	f__Intrasporangiaceae	g__unclassified_f__Intrasporangiaceae	s__unclassified_f__Intrasporangiaceae	ASV8379	6	4.90889e-6	0.03125
d__Bacteria	k__norank_d__Bacteria	p__Actinobacteriota	c__Actinobacteria	o__Micrococcales	f__Intrasporangiaceae	g__unclassified_f__Intrasporangiaceae	s__unclassified_f__Intrasporangiaceae	ASV8434	4	3.27259e-6	0.03125
d__Bacteria	k__norank_d__Bacteria	p__Actinobacteriota	c__Actinobacteria	o__Micrococcales	f__Intrasporangiaceae	g__unclassified_f__Intrasporangiaceae	s__unclassified_f__Intrasporangiaceae	ASV8500	1	8.18148e-7	0.03125
d__Bacteria	k__norank_d__Bacteria	p__Actinobacteriota	c__Actinobacteria	o__Micrococcales	f__Microbacteriaceae	g__Agrococcus	s__unclassified_g__Agrococcus	ASV4744	2	1.6363e-6	0.03125
d__Bacteria	k__norank_d__Bacteria	p__Actinobacteriota	c__Actinobacteria	o__Micrococcales	f__Microbacteriaceae	g__Agrococcus	s__unclassified_g__Agrococcus	ASV8670	5	4.09074e-6	0.03125
d__Bacteria	k__norank_d__Bacteria	p__Actinobacteriota	c__Actinobacteria	o__Micrococcales	f__Microbacteriaceae	g__Agromyces	s__unclassified_g__Agromyces	ASV20351	3	2.45445e-6	0.03125
d__Bacteria	k__norank_d__Bacteria	p__Actinobacteriota	c__Actinobacteria	o__Micrococcales	f__Microbacteriaceae	g__Agromyces	s__unclassified_g__Agromyces	ASV20478	2	1.6363e-6	0.03125
d__Bacteria	k__norank_d__Bacteria	p__Actinobacteriota	c__Actinobacteria	o__Micrococcales	f__Microbacteriaceae	g__Agromyces	s__unclassified_g__Agromyces	ASV21356	10	8.18148e-6	0.03125
d__Bacteria	k__norank_d__Bacteria	p__Actinobacteriota	c__Actinobacteria	o__Micrococcales	f__Microbacteriaceae	g__Agromyces	s__unclassified_g__Agromyces	ASV25831	4	3.27259e-6	0.03125
d__Bacteria	k__norank_d__Bacteria	p__Actinobacteriota	c__Actinobacteria	o__Micrococcales	f__Microbacteriaceae	g__Agromyces	s__unclassified_g__Agromyces	ASV26846	1	8.18148e-7	0.03125
d__Bacteria	k__norank_d__Bacteria	p__Actinobacteriota	c__Actinobacteria	o__Micrococcales	f__Microbacteriaceae	g__Agromyces	s__unclassified_g__Agromyces	ASV29542	3	2.45445e-6	0.03125
d__Bacteria	k__norank_d__Bacteria	p__Actinobacteriota	c__Actinobacteria	o__Micrococcales	f__Microbacteriaceae	g__Agromyces	s__unclassified_g__Agromyces	ASV436	156	0.00013	0.46875
d__Bacteria	k__norank_d__Bacteria	p__Actinobacteriota	c__Actinobacteria	o__Micrococcales	f__Microbacteriaceae	g__Agromyces	s__unclassified_g__Agromyces	ASV4536	15	1.0E-5	0.0625
d__Bacteria	k__norank_d__Bacteria	p__Actinobacteriota	c__Actinobacteria	o__Micrococcales	f__Microbacteriaceae	g__Agromyces	s__unclassified_g__Agromyces	ASV4994	20	2.0E-5	0.09375
d__Bacteria	k__norank_d__Bacteria	p__Actinobacteriota	c__Actinobacteria	o__Micrococcales	f__Microbacteriaceae	g__Amnibacterium	s__unclassified_g__Amnibacterium	ASV20682	10	8.18148e-6	0.03125
d__Bacteria	k__norank_d__Bacteria	p__Actinobacteriota	c__Actinobacteria	o__Micrococcales	f__Microbacteriaceae	g__Amnibacterium	s__uncultured_bacterium_g__Amnibacterium	ASV26629	5	4.09074e-6	0.03125
d__Bacteria	k__norank_d__Bacteria	p__Actinobacteriota	c__Actinobacteria	o__Micrococcales	f__Microbacteriaceae	g__Amnibacterium	s__uncultured_bacterium_g__Amnibacterium	ASV6356	13	1.0E-5	0.09375
d__Bacteria	k__norank_d__Bacteria	p__Actinobacteriota	c__Actinobacteria	o__Micrococcales	f__Microbacteriaceae	g__Cryobacterium	s__unclassified_g__Cryobacterium	ASV1037	3	2.45445e-6	0.0625
d__Bacteria	k__norank_d__Bacteria	p__Actinobacteriota	c__Actinobacteria	o__Micrococcales	f__Microbacteriaceae	g__Curtobacterium	s__unclassified_g__Curtobacterium	ASV22398	5	4.09074e-6	0.03125
d__Bacteria	k__norank_d__Bacteria	p__Actinobacteriota	c__Actinobacteria	o__Micrococcales	f__Microbacteriaceae	g__Curtobacterium	s__unclassified_g__Curtobacterium	ASV750	7	5.72704e-6	0.03125
d__Bacteria	k__norank_d__Bacteria	p__Actinobacteriota	c__Actinobacteria	o__Micrococcales	f__Microbacteriaceae	g__Humibacter	s__unclassified_g__Humibacter	ASV519	13	1.0E-5	0.0625
d__Bacteria	k__norank_d__Bacteria	p__Actinobacteriota	c__Actinobacteria	o__Micrococcales	f__Microbacteriaceae	g__Leifsonia	s__unclassified_g__Leifsonia	ASV1554	451	0.00037	0.25
d__Bacteria	k__norank_d__Bacteria	p__Actinobacteriota	c__Actinobacteria	o__Micrococcales	f__Microbacteriaceae	g__Leifsonia	s__unclassified_g__Leifsonia	ASV230	182	0.00015	0.28125
d__Bacteria	k__norank_d__Bacteria	p__Actinobacteriota	c__Actinobacteria	o__Micrococcales	f__Microbacteriaceae	g__Leifsonia	s__unclassified_g__Leifsonia	ASV29479	10	8.18148e-6	0.03125
d__Bacteria	k__norank_d__Bacteria	p__Actinobacteriota	c__Actinobacteria	o__Micrococcales	f__Microbacteriaceae	g__Leucobacter	s__unclassified_g__Leucobacter	ASV20195	2	1.6363e-6	0.03125
d__Bacteria	k__norank_d__Bacteria	p__Actinobacteriota	c__Actinobacteria	o__Micrococcales	f__Microbacteriaceae	g__Leucobacter	s__unclassified_g__Leucobacter	ASV20403	2	1.6363e-6	0.03125
d__Bacteria	k__norank_d__Bacteria	p__Actinobacteriota	c__Actinobacteria	o__Micrococcales	f__Microbacteriaceae	g__Leucobacter	s__unclassified_g__Leucobacter	ASV20445	1	8.18148e-7	0.03125
d__Bacteria	k__norank_d__Bacteria	p__Actinobacteriota	c__Actinobacteria	o__Micrococcales	f__Microbacteriaceae	g__Leucobacter	s__unclassified_g__Leucobacter	ASV20799	5	4.09074e-6	0.03125
d__Bacteria	k__norank_d__Bacteria	p__Actinobacteriota	c__Actinobacteria	o__Micrococcales	f__Microbacteriaceae	g__Leucobacter	s__unclassified_g__Leucobacter	ASV21057	2	1.6363e-6	0.03125
d__Bacteria	k__norank_d__Bacteria	p__Actinobacteriota	c__Actinobacteria	o__Micrococcales	f__Microbacteriaceae	g__Leucobacter	s__unclassified_g__Leucobacter	ASV21542	3	2.45445e-6	0.03125
d__Bacteria	k__norank_d__Bacteria	p__Actinobacteriota	c__Actinobacteria	o__Micrococcales	f__Microbacteriaceae	g__Leucobacter	s__unclassified_g__Leucobacter	ASV26199	3	2.45445e-6	0.03125
d__Bacteria	k__norank_d__Bacteria	p__Actinobacteriota	c__Actinobacteria	o__Micrococcales	f__Microbacteriaceae	g__Leucobacter	s__unclassified_g__Leucobacter	ASV29549	7	5.72704e-6	0.03125
d__Bacteria	k__norank_d__Bacteria	p__Actinobacteriota	c__Actinobacteria	o__Micrococcales	f__Microbacteriaceae	g__Leucobacter	s__unclassified_g__Leucobacter	ASV4541	8	6.54519e-6	0.03125
d__Bacteria	k__norank_d__Bacteria	p__Actinobacteriota	c__Actinobacteria	o__Micrococcales	f__Microbacteriaceae	g__Leucobacter	s__unclassified_g__Leucobacter	ASV8727	8	6.54519e-6	0.03125
d__Bacteria	k__norank_d__Bacteria	p__Actinobacteriota	c__Actinobacteria	o__Micrococcales	f__Microbacteriaceae	g__Lysinimonas	s__unclassified_g__Lysinimonas	ASV21443	6	4.90889e-6	0.03125
d__Bacteria	k__norank_d__Bacteria	p__Actinobacteriota	c__Actinobacteria	o__Micrococcales	f__Microbacteriaceae	g__Lysinimonas	s__unclassified_g__Lysinimonas	ASV7582	22	2.0E-5	0.03125
d__Bacteria	k__norank_d__Bacteria	p__Actinobacteriota	c__Actinobacteria	o__Micrococcales	f__Microbacteriaceae	g__Microbacterium	s__Microbacterium_luticocti	ASV528	41	3.0E-5	0.125
d__Bacteria	k__norank_d__Bacteria	p__Actinobacteriota	c__Actinobacteria	o__Micrococcales	f__Microbacteriaceae	g__Microbacterium	s__unclassified_g__Microbacterium	ASV1042	2	1.6363e-6	0.03125
d__Bacteria	k__norank_d__Bacteria	p__Actinobacteriota	c__Actinobacteria	o__Micrococcales	f__Microbacteriaceae	g__Microbacterium	s__unclassified_g__Microbacterium	ASV1346	1168	0.00096	0.78125
d__Bacteria	k__norank_d__Bacteria	p__Actinobacteriota	c__Actinobacteria	o__Micrococcales	f__Microbacteriaceae	g__Microbacterium	s__unclassified_g__Microbacterium	ASV143	2069	0.00169	1
d__Bacteria	k__norank_d__Bacteria	p__Actinobacteriota	c__Actinobacteria	o__Micrococcales	f__Microbacteriaceae	g__Microbacterium	s__unclassified_g__Microbacterium	ASV1897	2010	0.00164	0.71875
d__Bacteria	k__norank_d__Bacteria	p__Actinobacteriota	c__Actinobacteria	o__Micrococcales	f__Microbacteriaceae	g__Microbacterium	s__unclassified_g__Microbacterium	ASV20536	1	8.18148e-7	0.03125
d__Bacteria	k__norank_d__Bacteria	p__Actinobacteriota	c__Actinobacteria	o__Micrococcales	f__Microbacteriaceae	g__Microbacterium	s__unclassified_g__Microbacterium	ASV20606	33	3.0E-5	0.09375
d__Bacteria	k__norank_d__Bacteria	p__Actinobacteriota	c__Actinobacteria	o__Micrococcales	f__Microbacteriaceae	g__Microbacterium	s__unclassified_g__Microbacterium	ASV20926	3	2.45445e-6	0.03125
d__Bacteria	k__norank_d__Bacteria	p__Actinobacteriota	c__Actinobacteria	o__Micrococcales	f__Microbacteriaceae	g__Microbacterium	s__unclassified_g__Microbacterium	ASV21000	3	2.45445e-6	0.03125
d__Bacteria	k__norank_d__Bacteria	p__Actinobacteriota	c__Actinobacteria	o__Micrococcales	f__Microbacteriaceae	g__Microbacterium	s__unclassified_g__Microbacterium	ASV21081	2	1.6363e-6	0.03125
d__Bacteria	k__norank_d__Bacteria	p__Actinobacteriota	c__Actinobacteria	o__Micrococcales	f__Microbacteriaceae	g__Microbacterium	s__unclassified_g__Microbacterium	ASV21175	37	3.0E-5	0.03125
d__Bacteria	k__norank_d__Bacteria	p__Actinobacteriota	c__Actinobacteria	o__Micrococcales	f__Microbacteriaceae	g__Microbacterium	s__unclassified_g__Microbacterium	ASV21429	6	4.90889e-6	0.03125
d__Bacteria	k__norank_d__Bacteria	p__Actinobacteriota	c__Actinobacteria	o__Micrococcales	f__Microbacteriaceae	g__Microbacterium	s__unclassified_g__Microbacterium	ASV21517	3	2.45445e-6	0.03125
d__Bacteria	k__norank_d__Bacteria	p__Actinobacteriota	c__Actinobacteria	o__Micrococcales	f__Microbacteriaceae	g__Microbacterium	s__unclassified_g__Microbacterium	ASV21637	2	1.6363e-6	0.03125
d__Bacteria	k__norank_d__Bacteria	p__Actinobacteriota	c__Actinobacteria	o__Micrococcales	f__Microbacteriaceae	g__Microbacterium	s__unclassified_g__Microbacterium	ASV21714	2	1.6363e-6	0.03125
d__Bacteria	k__norank_d__Bacteria	p__Actinobacteriota	c__Actinobacteria	o__Micrococcales	f__Microbacteriaceae	g__Microbacterium	s__unclassified_g__Microbacterium	ASV21731	2	1.6363e-6	0.03125
d__Bacteria	k__norank_d__Bacteria	p__Actinobacteriota	c__Actinobacteria	o__Micrococcales	f__Microbacteriaceae	g__Microbacterium	s__unclassified_g__Microbacterium	ASV21780	1	8.18148e-7	0.03125
d__Bacteria	k__norank_d__Bacteria	p__Actinobacteriota	c__Actinobacteria	o__Micrococcales	f__Microbacteriaceae	g__Microbacterium	s__unclassified_g__Microbacterium	ASV21904	2	1.6363e-6	0.03125
d__Bacteria	k__norank_d__Bacteria	p__Actinobacteriota	c__Actinobacteria	o__Micrococcales	f__Microbacteriaceae	g__Microbacterium	s__unclassified_g__Microbacterium	ASV22375	8	6.54519e-6	0.03125
d__Bacteria	k__norank_d__Bacteria	p__Actinobacteriota	c__Actinobacteria	o__Micrococcales	f__Microbacteriaceae	g__Microbacterium	s__unclassified_g__Microbacterium	ASV22379	3	2.45445e-6	0.03125
d__Bacteria	k__norank_d__Bacteria	p__Actinobacteriota	c__Actinobacteria	o__Micrococcales	f__Microbacteriaceae	g__Microbacterium	s__unclassified_g__Microbacterium	ASV22439	6	4.90889e-6	0.03125
d__Bacteria	k__norank_d__Bacteria	p__Actinobacteriota	c__Actinobacteria	o__Micrococcales	f__Microbacteriaceae	g__Microbacterium	s__unclassified_g__Microbacterium	ASV22485	5	4.09074e-6	0.03125
d__Bacteria	k__norank_d__Bacteria	p__Actinobacteriota	c__Actinobacteria	o__Micrococcales	f__Microbacteriaceae	g__Microbacterium	s__unclassified_g__Microbacterium	ASV22493	5	4.09074e-6	0.03125
d__Bacteria	k__norank_d__Bacteria	p__Actinobacteriota	c__Actinobacteria	o__Micrococcales	f__Microbacteriaceae	g__Microbacterium	s__unclassified_g__Microbacterium	ASV22660	2	1.6363e-6	0.03125
d__Bacteria	k__norank_d__Bacteria	p__Actinobacteriota	c__Actinobacteria	o__Micrococcales	f__Microbacteriaceae	g__Microbacterium	s__unclassified_g__Microbacterium	ASV22898	2	1.6363e-6	0.03125
d__Bacteria	k__norank_d__Bacteria	p__Actinobacteriota	c__Actinobacteria	o__Micrococcales	f__Microbacteriaceae	g__Microbacterium	s__unclassified_g__Microbacterium	ASV23508	3	2.45445e-6	0.03125
d__Bacteria	k__norank_d__Bacteria	p__Actinobacteriota	c__Actinobacteria	o__Micrococcales	f__Microbacteriaceae	g__Microbacterium	s__unclassified_g__Microbacterium	ASV2474	346	0.00028	0.4375
d__Bacteria	k__norank_d__Bacteria	p__Actinobacteriota	c__Actinobacteria	o__Micrococcales	f__Microbacteriaceae	g__Microbacterium	s__unclassified_g__Microbacterium	ASV25812	5	4.09074e-6	0.03125
d__Bacteria	k__norank_d__Bacteria	p__Actinobacteriota	c__Actinobacteria	o__Micrococcales	f__Microbacteriaceae	g__Microbacterium	s__unclassified_g__Microbacterium	ASV25879	3	2.45445e-6	0.03125
d__Bacteria	k__norank_d__Bacteria	p__Actinobacteriota	c__Actinobacteria	o__Micrococcales	f__Microbacteriaceae	g__Microbacterium	s__unclassified_g__Microbacterium	ASV25940	2	1.6363e-6	0.03125
d__Bacteria	k__norank_d__Bacteria	p__Actinobacteriota	c__Actinobacteria	o__Micrococcales	f__Microbacteriaceae	g__Microbacterium	s__unclassified_g__Microbacterium	ASV25951	2	1.6363e-6	0.03125
d__Bacteria	k__norank_d__Bacteria	p__Actinobacteriota	c__Actinobacteria	o__Micrococcales	f__Microbacteriaceae	g__Microbacterium	s__unclassified_g__Microbacterium	ASV25990	7	5.72704e-6	0.03125
d__Bacteria	k__norank_d__Bacteria	p__Actinobacteriota	c__Actinobacteria	o__Micrococcales	f__Microbacteriaceae	g__Microbacterium	s__unclassified_g__Microbacterium	ASV26024	7	5.72704e-6	0.03125
d__Bacteria	k__norank_d__Bacteria	p__Actinobacteriota	c__Actinobacteria	o__Micrococcales	f__Microbacteriaceae	g__Microbacterium	s__unclassified_g__Microbacterium	ASV26080	4	3.27259e-6	0.03125
d__Bacteria	k__norank_d__Bacteria	p__Actinobacteriota	c__Actinobacteria	o__Micrococcales	f__Microbacteriaceae	g__Microbacterium	s__unclassified_g__Microbacterium	ASV26408	2	1.6363e-6	0.03125
d__Bacteria	k__norank_d__Bacteria	p__Actinobacteriota	c__Actinobacteria	o__Micrococcales	f__Microbacteriaceae	g__Microbacterium	s__unclassified_g__Microbacterium	ASV26918	1	8.18148e-7	0.03125
d__Bacteria	k__norank_d__Bacteria	p__Actinobacteriota	c__Actinobacteria	o__Micrococcales	f__Microbacteriaceae	g__Microbacterium	s__unclassified_g__Microbacterium	ASV27143	2	1.6363e-6	0.03125
d__Bacteria	k__norank_d__Bacteria	p__Actinobacteriota	c__Actinobacteria	o__Micrococcales	f__Microbacteriaceae	g__Microbacterium	s__unclassified_g__Microbacterium	ASV28354	2	1.6363e-6	0.03125
d__Bacteria	k__norank_d__Bacteria	p__Actinobacteriota	c__Actinobacteria	o__Micrococcales	f__Microbacteriaceae	g__Microbacterium	s__unclassified_g__Microbacterium	ASV28394	2	1.6363e-6	0.03125
d__Bacteria	k__norank_d__Bacteria	p__Actinobacteriota	c__Actinobacteria	o__Micrococcales	f__Microbacteriaceae	g__Microbacterium	s__unclassified_g__Microbacterium	ASV28457	2	1.6363e-6	0.03125
d__Bacteria	k__norank_d__Bacteria	p__Actinobacteriota	c__Actinobacteria	o__Micrococcales	f__Microbacteriaceae	g__Microbacterium	s__unclassified_g__Microbacterium	ASV29236	3	2.45445e-6	0.03125
d__Bacteria	k__norank_d__Bacteria	p__Actinobacteriota	c__Actinobacteria	o__Micrococcales	f__Microbacteriaceae	g__Microbacterium	s__unclassified_g__Microbacterium	ASV29379	41	3.0E-5	0.03125
d__Bacteria	k__norank_d__Bacteria	p__Actinobacteriota	c__Actinobacteria	o__Micrococcales	f__Microbacteriaceae	g__Microbacterium	s__unclassified_g__Microbacterium	ASV29437	11	8.99963e-6	0.03125
d__Bacteria	k__norank_d__Bacteria	p__Actinobacteriota	c__Actinobacteria	o__Micrococcales	f__Microbacteriaceae	g__Microbacterium	s__unclassified_g__Microbacterium	ASV29610	4	3.27259e-6	0.03125
d__Bacteria	k__norank_d__Bacteria	p__Actinobacteriota	c__Actinobacteria	o__Micrococcales	f__Microbacteriaceae	g__Microbacterium	s__unclassified_g__Microbacterium	ASV29622	3	2.45445e-6	0.03125
d__Bacteria	k__norank_d__Bacteria	p__Actinobacteriota	c__Actinobacteria	o__Micrococcales	f__Microbacteriaceae	g__Microbacterium	s__unclassified_g__Microbacterium	ASV3237	19	2.0E-5	0.03125
d__Bacteria	k__norank_d__Bacteria	p__Actinobacteriota	c__Actinobacteria	o__Micrococcales	f__Microbacteriaceae	g__Microbacterium	s__unclassified_g__Microbacterium	ASV32477	10	8.18148e-6	0.03125
d__Bacteria	k__norank_d__Bacteria	p__Actinobacteriota	c__Actinobacteria	o__Micrococcales	f__Microbacteriaceae	g__Microbacterium	s__unclassified_g__Microbacterium	ASV32496	6	4.90889e-6	0.03125
d__Bacteria	k__norank_d__Bacteria	p__Actinobacteriota	c__Actinobacteria	o__Micrococcales	f__Microbacteriaceae	g__Microbacterium	s__unclassified_g__Microbacterium	ASV32501	8	6.54519e-6	0.03125
d__Bacteria	k__norank_d__Bacteria	p__Actinobacteriota	c__Actinobacteria	o__Micrococcales	f__Microbacteriaceae	g__Microbacterium	s__unclassified_g__Microbacterium	ASV32643	1	8.18148e-7	0.03125
d__Bacteria	k__norank_d__Bacteria	p__Actinobacteriota	c__Actinobacteria	o__Micrococcales	f__Microbacteriaceae	g__Microbacterium	s__unclassified_g__Microbacterium	ASV355	132	0.00011	0.125
d__Bacteria	k__norank_d__Bacteria	p__Actinobacteriota	c__Actinobacteria	o__Micrococcales	f__Microbacteriaceae	g__Microbacterium	s__unclassified_g__Microbacterium	ASV4674	2	1.6363e-6	0.03125
d__Bacteria	k__norank_d__Bacteria	p__Actinobacteriota	c__Actinobacteria	o__Micrococcales	f__Microbacteriaceae	g__Microbacterium	s__unclassified_g__Microbacterium	ASV4805	1	8.18148e-7	0.03125
d__Bacteria	k__norank_d__Bacteria	p__Actinobacteriota	c__Actinobacteria	o__Micrococcales	f__Microbacteriaceae	g__Microbacterium	s__unclassified_g__Microbacterium	ASV4899	1	8.18148e-7	0.03125
d__Bacteria	k__norank_d__Bacteria	p__Actinobacteriota	c__Actinobacteria	o__Micrococcales	f__Microbacteriaceae	g__Microbacterium	s__unclassified_g__Microbacterium	ASV5103	72	6.0E-5	0.125
d__Bacteria	k__norank_d__Bacteria	p__Actinobacteriota	c__Actinobacteria	o__Micrococcales	f__Microbacteriaceae	g__Microbacterium	s__unclassified_g__Microbacterium	ASV5733	4	3.27259e-6	0.03125
d__Bacteria	k__norank_d__Bacteria	p__Actinobacteriota	c__Actinobacteria	o__Micrococcales	f__Microbacteriaceae	g__Microbacterium	s__unclassified_g__Microbacterium	ASV6283	2	1.6363e-6	0.03125
d__Bacteria	k__norank_d__Bacteria	p__Actinobacteriota	c__Actinobacteria	o__Micrococcales	f__Microbacteriaceae	g__Microbacterium	s__unclassified_g__Microbacterium	ASV6735	2	1.6363e-6	0.03125
d__Bacteria	k__norank_d__Bacteria	p__Actinobacteriota	c__Actinobacteria	o__Micrococcales	f__Microbacteriaceae	g__Microbacterium	s__unclassified_g__Microbacterium	ASV6934	1	8.18148e-7	0.03125
d__Bacteria	k__norank_d__Bacteria	p__Actinobacteriota	c__Actinobacteria	o__Micrococcales	f__Microbacteriaceae	g__Microbacterium	s__unclassified_g__Microbacterium	ASV7069	16	1.0E-5	0.03125
d__Bacteria	k__norank_d__Bacteria	p__Actinobacteriota	c__Actinobacteria	o__Micrococcales	f__Microbacteriaceae	g__Microbacterium	s__unclassified_g__Microbacterium	ASV7081	14	1.0E-5	0.03125
d__Bacteria	k__norank_d__Bacteria	p__Actinobacteriota	c__Actinobacteria	o__Micrococcales	f__Microbacteriaceae	g__Microbacterium	s__unclassified_g__Microbacterium	ASV7170	7	5.72704e-6	0.03125
d__Bacteria	k__norank_d__Bacteria	p__Actinobacteriota	c__Actinobacteria	o__Micrococcales	f__Microbacteriaceae	g__Microbacterium	s__unclassified_g__Microbacterium	ASV7426	2	1.6363e-6	0.03125
d__Bacteria	k__norank_d__Bacteria	p__Actinobacteriota	c__Actinobacteria	o__Micrococcales	f__Microbacteriaceae	g__Microbacterium	s__unclassified_g__Microbacterium	ASV8350	9	7.36334e-6	0.03125
d__Bacteria	k__norank_d__Bacteria	p__Actinobacteriota	c__Actinobacteria	o__Micrococcales	f__Microbacteriaceae	g__Microbacterium	s__unclassified_g__Microbacterium	ASV8363	8	6.54519e-6	0.03125
d__Bacteria	k__norank_d__Bacteria	p__Actinobacteriota	c__Actinobacteria	o__Micrococcales	f__Microbacteriaceae	g__Microbacterium	s__unclassified_g__Microbacterium	ASV8410	5	4.09074e-6	0.03125
d__Bacteria	k__norank_d__Bacteria	p__Actinobacteriota	c__Actinobacteria	o__Micrococcales	f__Microbacteriaceae	g__Microbacterium	s__unclassified_g__Microbacterium	ASV8710	9	7.36334e-6	0.03125
d__Bacteria	k__norank_d__Bacteria	p__Actinobacteriota	c__Actinobacteria	o__Micrococcales	f__Microbacteriaceae	g__Microbacterium	s__unclassified_g__Microbacterium	ASV9026	2	1.6363e-6	0.03125
d__Bacteria	k__norank_d__Bacteria	p__Actinobacteriota	c__Actinobacteria	o__Micrococcales	f__Microbacteriaceae	g__Pseudoclavibacter	s__unclassified_g__Pseudoclavibacter	ASV8619	14	1.0E-5	0.03125
d__Bacteria	k__norank_d__Bacteria	p__Actinobacteriota	c__Actinobacteria	o__Micrococcales	f__Microbacteriaceae	g__unclassified_f__Microbacteriaceae	s__unclassified_f__Microbacteriaceae	ASV1457	13	1.0E-5	0.03125
d__Bacteria	k__norank_d__Bacteria	p__Actinobacteriota	c__Actinobacteria	o__Micrococcales	f__Microbacteriaceae	g__unclassified_f__Microbacteriaceae	s__unclassified_f__Microbacteriaceae	ASV20036	3	2.45445e-6	0.03125
d__Bacteria	k__norank_d__Bacteria	p__Actinobacteriota	c__Actinobacteria	o__Micrococcales	f__Microbacteriaceae	g__unclassified_f__Microbacteriaceae	s__unclassified_f__Microbacteriaceae	ASV20087	1	8.18148e-7	0.03125
d__Bacteria	k__norank_d__Bacteria	p__Actinobacteriota	c__Actinobacteria	o__Micrococcales	f__Microbacteriaceae	g__unclassified_f__Microbacteriaceae	s__unclassified_f__Microbacteriaceae	ASV20155	3	2.45445e-6	0.03125
d__Bacteria	k__norank_d__Bacteria	p__Actinobacteriota	c__Actinobacteria	o__Micrococcales	f__Microbacteriaceae	g__unclassified_f__Microbacteriaceae	s__unclassified_f__Microbacteriaceae	ASV20193	3	2.45445e-6	0.03125
d__Bacteria	k__norank_d__Bacteria	p__Actinobacteriota	c__Actinobacteria	o__Micrococcales	f__Microbacteriaceae	g__unclassified_f__Microbacteriaceae	s__unclassified_f__Microbacteriaceae	ASV20374	3	2.45445e-6	0.03125
d__Bacteria	k__norank_d__Bacteria	p__Actinobacteriota	c__Actinobacteria	o__Micrococcales	f__Microbacteriaceae	g__unclassified_f__Microbacteriaceae	s__unclassified_f__Microbacteriaceae	ASV20498	2	1.6363e-6	0.03125
d__Bacteria	k__norank_d__Bacteria	p__Actinobacteriota	c__Actinobacteria	o__Micrococcales	f__Microbacteriaceae	g__unclassified_f__Microbacteriaceae	s__unclassified_f__Microbacteriaceae	ASV21696	3	2.45445e-6	0.03125
d__Bacteria	k__norank_d__Bacteria	p__Actinobacteriota	c__Actinobacteria	o__Micrococcales	f__Microbacteriaceae	g__unclassified_f__Microbacteriaceae	s__unclassified_f__Microbacteriaceae	ASV21777	1	8.18148e-7	0.03125
d__Bacteria	k__norank_d__Bacteria	p__Actinobacteriota	c__Actinobacteria	o__Micrococcales	f__Microbacteriaceae	g__unclassified_f__Microbacteriaceae	s__unclassified_f__Microbacteriaceae	ASV22402	7	5.72704e-6	0.03125
d__Bacteria	k__norank_d__Bacteria	p__Actinobacteriota	c__Actinobacteria	o__Micrococcales	f__Microbacteriaceae	g__unclassified_f__Microbacteriaceae	s__unclassified_f__Microbacteriaceae	ASV22447	6	4.90889e-6	0.03125
d__Bacteria	k__norank_d__Bacteria	p__Actinobacteriota	c__Actinobacteria	o__Micrococcales	f__Microbacteriaceae	g__unclassified_f__Microbacteriaceae	s__unclassified_f__Microbacteriaceae	ASV22866	2	1.6363e-6	0.03125
d__Bacteria	k__norank_d__Bacteria	p__Actinobacteriota	c__Actinobacteria	o__Micrococcales	f__Microbacteriaceae	g__unclassified_f__Microbacteriaceae	s__unclassified_f__Microbacteriaceae	ASV25874	2	1.6363e-6	0.03125
d__Bacteria	k__norank_d__Bacteria	p__Actinobacteriota	c__Actinobacteria	o__Micrococcales	f__Microbacteriaceae	g__unclassified_f__Microbacteriaceae	s__unclassified_f__Microbacteriaceae	ASV26209	3	2.45445e-6	0.03125
d__Bacteria	k__norank_d__Bacteria	p__Actinobacteriota	c__Actinobacteria	o__Micrococcales	f__Microbacteriaceae	g__unclassified_f__Microbacteriaceae	s__unclassified_f__Microbacteriaceae	ASV26290	1	8.18148e-7	0.03125
d__Bacteria	k__norank_d__Bacteria	p__Actinobacteriota	c__Actinobacteria	o__Micrococcales	f__Microbacteriaceae	g__unclassified_f__Microbacteriaceae	s__unclassified_f__Microbacteriaceae	ASV26413	1	8.18148e-7	0.03125
d__Bacteria	k__norank_d__Bacteria	p__Actinobacteriota	c__Actinobacteria	o__Micrococcales	f__Microbacteriaceae	g__unclassified_f__Microbacteriaceae	s__unclassified_f__Microbacteriaceae	ASV26901	2	1.6363e-6	0.03125
d__Bacteria	k__norank_d__Bacteria	p__Actinobacteriota	c__Actinobacteria	o__Micrococcales	f__Microbacteriaceae	g__unclassified_f__Microbacteriaceae	s__unclassified_f__Microbacteriaceae	ASV27196	2	1.6363e-6	0.03125
d__Bacteria	k__norank_d__Bacteria	p__Actinobacteriota	c__Actinobacteria	o__Micrococcales	f__Microbacteriaceae	g__unclassified_f__Microbacteriaceae	s__unclassified_f__Microbacteriaceae	ASV2739	244	0.0002	0.53125
d__Bacteria	k__norank_d__Bacteria	p__Actinobacteriota	c__Actinobacteria	o__Micrococcales	f__Microbacteriaceae	g__unclassified_f__Microbacteriaceae	s__unclassified_f__Microbacteriaceae	ASV28387	3	2.45445e-6	0.03125
d__Bacteria	k__norank_d__Bacteria	p__Actinobacteriota	c__Actinobacteria	o__Micrococcales	f__Microbacteriaceae	g__unclassified_f__Microbacteriaceae	s__unclassified_f__Microbacteriaceae	ASV29332	2	1.6363e-6	0.03125
d__Bacteria	k__norank_d__Bacteria	p__Actinobacteriota	c__Actinobacteria	o__Micrococcales	f__Microbacteriaceae	g__unclassified_f__Microbacteriaceae	s__unclassified_f__Microbacteriaceae	ASV29473	8	6.54519e-6	0.03125
d__Bacteria	k__norank_d__Bacteria	p__Actinobacteriota	c__Actinobacteria	o__Micrococcales	f__Microbacteriaceae	g__unclassified_f__Microbacteriaceae	s__unclassified_f__Microbacteriaceae	ASV29510	6	4.90889e-6	0.03125
d__Bacteria	k__norank_d__Bacteria	p__Actinobacteriota	c__Actinobacteria	o__Micrococcales	f__Microbacteriaceae	g__unclassified_f__Microbacteriaceae	s__unclassified_f__Microbacteriaceae	ASV29617	4	3.27259e-6	0.03125
d__Bacteria	k__norank_d__Bacteria	p__Actinobacteriota	c__Actinobacteria	o__Micrococcales	f__Microbacteriaceae	g__unclassified_f__Microbacteriaceae	s__unclassified_f__Microbacteriaceae	ASV29942	1	8.18148e-7	0.03125
d__Bacteria	k__norank_d__Bacteria	p__Actinobacteriota	c__Actinobacteria	o__Micrococcales	f__Microbacteriaceae	g__unclassified_f__Microbacteriaceae	s__unclassified_f__Microbacteriaceae	ASV32625	1	8.18148e-7	0.03125
d__Bacteria	k__norank_d__Bacteria	p__Actinobacteriota	c__Actinobacteria	o__Micrococcales	f__Microbacteriaceae	g__unclassified_f__Microbacteriaceae	s__unclassified_f__Microbacteriaceae	ASV3456	60	5.0E-5	0.1875
d__Bacteria	k__norank_d__Bacteria	p__Actinobacteriota	c__Actinobacteria	o__Micrococcales	f__Microbacteriaceae	g__unclassified_f__Microbacteriaceae	s__unclassified_f__Microbacteriaceae	ASV3666	9	7.36334e-6	0.03125
d__Bacteria	k__norank_d__Bacteria	p__Actinobacteriota	c__Actinobacteria	o__Micrococcales	f__Microbacteriaceae	g__unclassified_f__Microbacteriaceae	s__unclassified_f__Microbacteriaceae	ASV4339	182	0.00015	0.4375
d__Bacteria	k__norank_d__Bacteria	p__Actinobacteriota	c__Actinobacteria	o__Micrococcales	f__Microbacteriaceae	g__unclassified_f__Microbacteriaceae	s__unclassified_f__Microbacteriaceae	ASV4894	2	1.6363e-6	0.03125
d__Bacteria	k__norank_d__Bacteria	p__Actinobacteriota	c__Actinobacteria	o__Micrococcales	f__Microbacteriaceae	g__unclassified_f__Microbacteriaceae	s__unclassified_f__Microbacteriaceae	ASV5135	7	5.72704e-6	0.03125
d__Bacteria	k__norank_d__Bacteria	p__Actinobacteriota	c__Actinobacteria	o__Micrococcales	f__Microbacteriaceae	g__unclassified_f__Microbacteriaceae	s__unclassified_f__Microbacteriaceae	ASV6590	62	5.0E-5	0.125
d__Bacteria	k__norank_d__Bacteria	p__Actinobacteriota	c__Actinobacteria	o__Micrococcales	f__Microbacteriaceae	g__unclassified_f__Microbacteriaceae	s__unclassified_f__Microbacteriaceae	ASV679	7	5.72704e-6	0.03125
d__Bacteria	k__norank_d__Bacteria	p__Actinobacteriota	c__Actinobacteria	o__Micrococcales	f__Microbacteriaceae	g__unclassified_f__Microbacteriaceae	s__unclassified_f__Microbacteriaceae	ASV7409	2	1.6363e-6	0.03125
d__Bacteria	k__norank_d__Bacteria	p__Actinobacteriota	c__Actinobacteria	o__Micrococcales	f__Microbacteriaceae	g__unclassified_f__Microbacteriaceae	s__unclassified_f__Microbacteriaceae	ASV7498	17	1.0E-5	0.03125
d__Bacteria	k__norank_d__Bacteria	p__Actinobacteriota	c__Actinobacteria	o__Micrococcales	f__Microbacteriaceae	g__unclassified_f__Microbacteriaceae	s__unclassified_f__Microbacteriaceae	ASV7589	277	0.00023	0.0625
d__Bacteria	k__norank_d__Bacteria	p__Actinobacteriota	c__Actinobacteria	o__Micrococcales	f__Microbacteriaceae	g__unclassified_f__Microbacteriaceae	s__unclassified_f__Microbacteriaceae	ASV8110	2	1.6363e-6	0.03125
d__Bacteria	k__norank_d__Bacteria	p__Actinobacteriota	c__Actinobacteria	o__Micrococcales	f__Microbacteriaceae	g__unclassified_f__Microbacteriaceae	s__unclassified_f__Microbacteriaceae	ASV8382	6	4.90889e-6	0.03125
d__Bacteria	k__norank_d__Bacteria	p__Actinobacteriota	c__Actinobacteria	o__Micrococcales	f__Microbacteriaceae	g__unclassified_f__Microbacteriaceae	s__unclassified_f__Microbacteriaceae	ASV8699	148	0.00012	0.0625
d__Bacteria	k__norank_d__Bacteria	p__Actinobacteriota	c__Actinobacteria	o__Micrococcales	f__Micrococcaceae	g__Arthrobacter	s__unclassified_g__Arthrobacter	ASV21772	2	1.6363e-6	0.03125
d__Bacteria	k__norank_d__Bacteria	p__Actinobacteriota	c__Actinobacteria	o__Micrococcales	f__Micrococcaceae	g__Arthrobacter	s__unclassified_g__Arthrobacter	ASV23229	11	8.99963e-6	0.03125
d__Bacteria	k__norank_d__Bacteria	p__Actinobacteriota	c__Actinobacteria	o__Micrococcales	f__Micrococcaceae	g__Arthrobacter	s__unclassified_g__Arthrobacter	ASV23424	4	3.27259e-6	0.03125
d__Bacteria	k__norank_d__Bacteria	p__Actinobacteriota	c__Actinobacteria	o__Micrococcales	f__Micrococcaceae	g__Arthrobacter	s__unclassified_g__Arthrobacter	ASV25793	7	5.72704e-6	0.03125
d__Bacteria	k__norank_d__Bacteria	p__Actinobacteriota	c__Actinobacteria	o__Micrococcales	f__Micrococcaceae	g__Arthrobacter	s__unclassified_g__Arthrobacter	ASV30	771	0.00063	0.5625
d__Bacteria	k__norank_d__Bacteria	p__Actinobacteriota	c__Actinobacteria	o__Micrococcales	f__Micrococcaceae	g__Arthrobacter	s__unclassified_g__Arthrobacter	ASV445	41	3.0E-5	0.09375
d__Bacteria	k__norank_d__Bacteria	p__Actinobacteriota	c__Actinobacteria	o__Micrococcales	f__Micrococcaceae	g__Arthrobacter	s__unclassified_g__Arthrobacter	ASV5901	20	2.0E-5	0.0625
d__Bacteria	k__norank_d__Bacteria	p__Actinobacteriota	c__Actinobacteria	o__Micrococcales	f__Micrococcaceae	g__Arthrobacter	s__unclassified_g__Arthrobacter	ASV6921	3	2.45445e-6	0.03125
d__Bacteria	k__norank_d__Bacteria	p__Actinobacteriota	c__Actinobacteria	o__Micrococcales	f__Micrococcaceae	g__Arthrobacter	s__unclassified_g__Arthrobacter	ASV789	6	4.90889e-6	0.03125
d__Bacteria	k__norank_d__Bacteria	p__Actinobacteriota	c__Actinobacteria	o__Micrococcales	f__Micrococcaceae	g__Arthrobacter	s__unclassified_g__Arthrobacter	ASV8514	2	1.6363e-6	0.03125
d__Bacteria	k__norank_d__Bacteria	p__Actinobacteriota	c__Actinobacteria	o__Micrococcales	f__Micrococcaceae	g__Arthrobacter	s__unclassified_g__Arthrobacter	ASV8764	6	4.90889e-6	0.03125
d__Bacteria	k__norank_d__Bacteria	p__Actinobacteriota	c__Actinobacteria	o__Micrococcales	f__Micrococcaceae	g__Kocuria	s__unclassified_g__Kocuria	ASV20591	23	2.0E-5	0.03125
d__Bacteria	k__norank_d__Bacteria	p__Actinobacteriota	c__Actinobacteria	o__Micrococcales	f__Micrococcaceae	g__Paenarthrobacter	s__unclassified_g__Paenarthrobacter	ASV9613	221	0.00018	0.1875
d__Bacteria	k__norank_d__Bacteria	p__Actinobacteriota	c__Actinobacteria	o__Micrococcales	f__Micrococcaceae	g__Pseudarthrobacter	s__unclassified_g__Pseudarthrobacter	ASV1063	1	8.18148e-7	0.03125
d__Bacteria	k__norank_d__Bacteria	p__Actinobacteriota	c__Actinobacteria	o__Micrococcales	f__Micrococcaceae	g__Pseudarthrobacter	s__unclassified_g__Pseudarthrobacter	ASV1254	2	1.6363e-6	0.03125
d__Bacteria	k__norank_d__Bacteria	p__Actinobacteriota	c__Actinobacteria	o__Micrococcales	f__Micrococcaceae	g__Pseudarthrobacter	s__unclassified_g__Pseudarthrobacter	ASV149	188	0.00015	0.15625
d__Bacteria	k__norank_d__Bacteria	p__Actinobacteriota	c__Actinobacteria	o__Micrococcales	f__Micrococcaceae	g__Pseudarthrobacter	s__unclassified_g__Pseudarthrobacter	ASV23492	2	1.6363e-6	0.03125
d__Bacteria	k__norank_d__Bacteria	p__Actinobacteriota	c__Actinobacteria	o__Micrococcales	f__Micrococcaceae	g__Pseudarthrobacter	s__unclassified_g__Pseudarthrobacter	ASV25846	3	2.45445e-6	0.03125
d__Bacteria	k__norank_d__Bacteria	p__Actinobacteriota	c__Actinobacteria	o__Micrococcales	f__Micrococcaceae	g__Pseudarthrobacter	s__unclassified_g__Pseudarthrobacter	ASV26203	2	1.6363e-6	0.03125
d__Bacteria	k__norank_d__Bacteria	p__Actinobacteriota	c__Actinobacteria	o__Micrococcales	f__Micrococcaceae	g__Pseudarthrobacter	s__unclassified_g__Pseudarthrobacter	ASV26672	7	5.72704e-6	0.03125
d__Bacteria	k__norank_d__Bacteria	p__Actinobacteriota	c__Actinobacteria	o__Micrococcales	f__Micrococcaceae	g__Pseudarthrobacter	s__unclassified_g__Pseudarthrobacter	ASV27	1309	0.00107	0.625
d__Bacteria	k__norank_d__Bacteria	p__Actinobacteriota	c__Actinobacteria	o__Micrococcales	f__Micrococcaceae	g__Pseudarthrobacter	s__unclassified_g__Pseudarthrobacter	ASV292	128	0.0001	0.28125
d__Bacteria	k__norank_d__Bacteria	p__Actinobacteriota	c__Actinobacteria	o__Micrococcales	f__Micrococcaceae	g__Pseudarthrobacter	s__unclassified_g__Pseudarthrobacter	ASV29812	2	1.6363e-6	0.03125
d__Bacteria	k__norank_d__Bacteria	p__Actinobacteriota	c__Actinobacteria	o__Micrococcales	f__Micrococcaceae	g__Pseudarthrobacter	s__unclassified_g__Pseudarthrobacter	ASV37	1000	0.00082	0.46875
d__Bacteria	k__norank_d__Bacteria	p__Actinobacteriota	c__Actinobacteria	o__Micrococcales	f__Micrococcaceae	g__Pseudarthrobacter	s__unclassified_g__Pseudarthrobacter	ASV4730	3	2.45445e-6	0.03125
d__Bacteria	k__norank_d__Bacteria	p__Actinobacteriota	c__Actinobacteria	o__Micrococcales	f__Micrococcaceae	g__Pseudarthrobacter	s__unclassified_g__Pseudarthrobacter	ASV6084	6	4.90889e-6	0.03125
d__Bacteria	k__norank_d__Bacteria	p__Actinobacteriota	c__Actinobacteria	o__Micrococcales	f__Micrococcaceae	g__Pseudarthrobacter	s__unclassified_g__Pseudarthrobacter	ASV6904	3	2.45445e-6	0.03125
d__Bacteria	k__norank_d__Bacteria	p__Actinobacteriota	c__Actinobacteria	o__Micrococcales	f__Micrococcaceae	g__Pseudarthrobacter	s__unclassified_g__Pseudarthrobacter	ASV7375	3	2.45445e-6	0.03125
d__Bacteria	k__norank_d__Bacteria	p__Actinobacteriota	c__Actinobacteria	o__Micrococcales	f__Micrococcaceae	g__Pseudarthrobacter	s__unclassified_g__Pseudarthrobacter	ASV832	5	4.09074e-6	0.03125
d__Bacteria	k__norank_d__Bacteria	p__Actinobacteriota	c__Actinobacteria	o__Micrococcales	f__Micrococcaceae	g__Pseudarthrobacter	s__unclassified_g__Pseudarthrobacter	ASV94	74	6.0E-5	0.0625
d__Bacteria	k__norank_d__Bacteria	p__Actinobacteriota	c__Actinobacteria	o__Micrococcales	f__Micrococcaceae	g__unclassified_f__Micrococcaceae	s__unclassified_f__Micrococcaceae	ASV1001	2	1.6363e-6	0.03125
d__Bacteria	k__norank_d__Bacteria	p__Actinobacteriota	c__Actinobacteria	o__Micrococcales	f__Micrococcaceae	g__unclassified_f__Micrococcaceae	s__unclassified_f__Micrococcaceae	ASV1010	3	2.45445e-6	0.03125
d__Bacteria	k__norank_d__Bacteria	p__Actinobacteriota	c__Actinobacteria	o__Micrococcales	f__Micrococcaceae	g__unclassified_f__Micrococcaceae	s__unclassified_f__Micrococcaceae	ASV109	303	0.00025	0.28125
d__Bacteria	k__norank_d__Bacteria	p__Actinobacteriota	c__Actinobacteria	o__Micrococcales	f__Micrococcaceae	g__unclassified_f__Micrococcaceae	s__unclassified_f__Micrococcaceae	ASV1257	2	1.6363e-6	0.03125
d__Bacteria	k__norank_d__Bacteria	p__Actinobacteriota	c__Actinobacteria	o__Micrococcales	f__Micrococcaceae	g__unclassified_f__Micrococcaceae	s__unclassified_f__Micrococcaceae	ASV1417	59	5.0E-5	0.03125
d__Bacteria	k__norank_d__Bacteria	p__Actinobacteriota	c__Actinobacteria	o__Micrococcales	f__Micrococcaceae	g__unclassified_f__Micrococcaceae	s__unclassified_f__Micrococcaceae	ASV20788	4	3.27259e-6	0.03125
d__Bacteria	k__norank_d__Bacteria	p__Actinobacteriota	c__Actinobacteria	o__Micrococcales	f__Micrococcaceae	g__unclassified_f__Micrococcaceae	s__unclassified_f__Micrococcaceae	ASV20925	3	2.45445e-6	0.03125
d__Bacteria	k__norank_d__Bacteria	p__Actinobacteriota	c__Actinobacteria	o__Micrococcales	f__Micrococcaceae	g__unclassified_f__Micrococcaceae	s__unclassified_f__Micrococcaceae	ASV21095	1	8.18148e-7	0.03125
d__Bacteria	k__norank_d__Bacteria	p__Actinobacteriota	c__Actinobacteria	o__Micrococcales	f__Micrococcaceae	g__unclassified_f__Micrococcaceae	s__unclassified_f__Micrococcaceae	ASV21126	1	8.18148e-7	0.03125
d__Bacteria	k__norank_d__Bacteria	p__Actinobacteriota	c__Actinobacteria	o__Micrococcales	f__Micrococcaceae	g__unclassified_f__Micrococcaceae	s__unclassified_f__Micrococcaceae	ASV21514	4	3.27259e-6	0.03125
d__Bacteria	k__norank_d__Bacteria	p__Actinobacteriota	c__Actinobacteria	o__Micrococcales	f__Micrococcaceae	g__unclassified_f__Micrococcaceae	s__unclassified_f__Micrococcaceae	ASV21526	7	5.72704e-6	0.03125
d__Bacteria	k__norank_d__Bacteria	p__Actinobacteriota	c__Actinobacteria	o__Micrococcales	f__Micrococcaceae	g__unclassified_f__Micrococcaceae	s__unclassified_f__Micrococcaceae	ASV22438	6	4.90889e-6	0.03125
d__Bacteria	k__norank_d__Bacteria	p__Actinobacteriota	c__Actinobacteria	o__Micrococcales	f__Micrococcaceae	g__unclassified_f__Micrococcaceae	s__unclassified_f__Micrococcaceae	ASV22588	5	4.09074e-6	0.03125
d__Bacteria	k__norank_d__Bacteria	p__Actinobacteriota	c__Actinobacteria	o__Micrococcales	f__Micrococcaceae	g__unclassified_f__Micrococcaceae	s__unclassified_f__Micrococcaceae	ASV23549	2	1.6363e-6	0.03125
d__Bacteria	k__norank_d__Bacteria	p__Actinobacteriota	c__Actinobacteria	o__Micrococcales	f__Micrococcaceae	g__unclassified_f__Micrococcaceae	s__unclassified_f__Micrococcaceae	ASV25807	5	4.09074e-6	0.03125
d__Bacteria	k__norank_d__Bacteria	p__Actinobacteriota	c__Actinobacteria	o__Micrococcales	f__Micrococcaceae	g__unclassified_f__Micrococcaceae	s__unclassified_f__Micrococcaceae	ASV26200	1	8.18148e-7	0.03125
d__Bacteria	k__norank_d__Bacteria	p__Actinobacteriota	c__Actinobacteria	o__Micrococcales	f__Micrococcaceae	g__unclassified_f__Micrococcaceae	s__unclassified_f__Micrococcaceae	ASV26407	2	1.6363e-6	0.03125
d__Bacteria	k__norank_d__Bacteria	p__Actinobacteriota	c__Actinobacteria	o__Micrococcales	f__Micrococcaceae	g__unclassified_f__Micrococcaceae	s__unclassified_f__Micrococcaceae	ASV26832	2	1.6363e-6	0.03125
d__Bacteria	k__norank_d__Bacteria	p__Actinobacteriota	c__Actinobacteria	o__Micrococcales	f__Micrococcaceae	g__unclassified_f__Micrococcaceae	s__unclassified_f__Micrococcaceae	ASV27079	2	1.6363e-6	0.03125
d__Bacteria	k__norank_d__Bacteria	p__Actinobacteriota	c__Actinobacteria	o__Micrococcales	f__Micrococcaceae	g__unclassified_f__Micrococcaceae	s__unclassified_f__Micrococcaceae	ASV28462	2	1.6363e-6	0.03125
d__Bacteria	k__norank_d__Bacteria	p__Actinobacteriota	c__Actinobacteria	o__Micrococcales	f__Micrococcaceae	g__unclassified_f__Micrococcaceae	s__unclassified_f__Micrococcaceae	ASV29178	5	4.09074e-6	0.03125
d__Bacteria	k__norank_d__Bacteria	p__Actinobacteriota	c__Actinobacteria	o__Micrococcales	f__Micrococcaceae	g__unclassified_f__Micrococcaceae	s__unclassified_f__Micrococcaceae	ASV29287	3	2.45445e-6	0.03125
d__Bacteria	k__norank_d__Bacteria	p__Actinobacteriota	c__Actinobacteria	o__Micrococcales	f__Micrococcaceae	g__unclassified_f__Micrococcaceae	s__unclassified_f__Micrococcaceae	ASV29655	5	4.09074e-6	0.03125
d__Bacteria	k__norank_d__Bacteria	p__Actinobacteriota	c__Actinobacteria	o__Micrococcales	f__Micrococcaceae	g__unclassified_f__Micrococcaceae	s__unclassified_f__Micrococcaceae	ASV29726	2	1.6363e-6	0.03125
d__Bacteria	k__norank_d__Bacteria	p__Actinobacteriota	c__Actinobacteria	o__Micrococcales	f__Micrococcaceae	g__unclassified_f__Micrococcaceae	s__unclassified_f__Micrococcaceae	ASV345	84	7.0E-5	0.15625
d__Bacteria	k__norank_d__Bacteria	p__Actinobacteriota	c__Actinobacteria	o__Micrococcales	f__Micrococcaceae	g__unclassified_f__Micrococcaceae	s__unclassified_f__Micrococcaceae	ASV382	13	1.0E-5	0.03125
d__Bacteria	k__norank_d__Bacteria	p__Actinobacteriota	c__Actinobacteria	o__Micrococcales	f__Micrococcaceae	g__unclassified_f__Micrococcaceae	s__unclassified_f__Micrococcaceae	ASV391	26	2.0E-5	0.09375
d__Bacteria	k__norank_d__Bacteria	p__Actinobacteriota	c__Actinobacteria	o__Micrococcales	f__Micrococcaceae	g__unclassified_f__Micrococcaceae	s__unclassified_f__Micrococcaceae	ASV444	12	9.81778e-6	0.03125
d__Bacteria	k__norank_d__Bacteria	p__Actinobacteriota	c__Actinobacteria	o__Micrococcales	f__Micrococcaceae	g__unclassified_f__Micrococcaceae	s__unclassified_f__Micrococcaceae	ASV4639	6	4.90889e-6	0.03125
d__Bacteria	k__norank_d__Bacteria	p__Actinobacteriota	c__Actinobacteria	o__Micrococcales	f__Micrococcaceae	g__unclassified_f__Micrococcaceae	s__unclassified_f__Micrococcaceae	ASV4652	5	4.09074e-6	0.03125
d__Bacteria	k__norank_d__Bacteria	p__Actinobacteriota	c__Actinobacteria	o__Micrococcales	f__Micrococcaceae	g__unclassified_f__Micrococcaceae	s__unclassified_f__Micrococcaceae	ASV49	578	0.00047	0.5
d__Bacteria	k__norank_d__Bacteria	p__Actinobacteriota	c__Actinobacteria	o__Micrococcales	f__Micrococcaceae	g__unclassified_f__Micrococcaceae	s__unclassified_f__Micrococcaceae	ASV524	11	8.99963e-6	0.03125
d__Bacteria	k__norank_d__Bacteria	p__Actinobacteriota	c__Actinobacteria	o__Micrococcales	f__Micrococcaceae	g__unclassified_f__Micrococcaceae	s__unclassified_f__Micrococcaceae	ASV5754	1	8.18148e-7	0.03125
d__Bacteria	k__norank_d__Bacteria	p__Actinobacteriota	c__Actinobacteria	o__Micrococcales	f__Micrococcaceae	g__unclassified_f__Micrococcaceae	s__unclassified_f__Micrococcaceae	ASV6022	7	5.72704e-6	0.03125
d__Bacteria	k__norank_d__Bacteria	p__Actinobacteriota	c__Actinobacteria	o__Micrococcales	f__Micrococcaceae	g__unclassified_f__Micrococcaceae	s__unclassified_f__Micrococcaceae	ASV6081	6	4.90889e-6	0.03125
d__Bacteria	k__norank_d__Bacteria	p__Actinobacteriota	c__Actinobacteria	o__Micrococcales	f__Micrococcaceae	g__unclassified_f__Micrococcaceae	s__unclassified_f__Micrococcaceae	ASV649	10	8.18148e-6	0.0625
d__Bacteria	k__norank_d__Bacteria	p__Actinobacteriota	c__Actinobacteria	o__Micrococcales	f__Micrococcaceae	g__unclassified_f__Micrococcaceae	s__unclassified_f__Micrococcaceae	ASV6689	2	1.6363e-6	0.03125
d__Bacteria	k__norank_d__Bacteria	p__Actinobacteriota	c__Actinobacteria	o__Micrococcales	f__Micrococcaceae	g__unclassified_f__Micrococcaceae	s__unclassified_f__Micrococcaceae	ASV6809	10	8.18148e-6	0.03125
d__Bacteria	k__norank_d__Bacteria	p__Actinobacteriota	c__Actinobacteria	o__Micrococcales	f__Micrococcaceae	g__unclassified_f__Micrococcaceae	s__unclassified_f__Micrococcaceae	ASV6925	3	2.45445e-6	0.03125
d__Bacteria	k__norank_d__Bacteria	p__Actinobacteriota	c__Actinobacteria	o__Micrococcales	f__Micrococcaceae	g__unclassified_f__Micrococcaceae	s__unclassified_f__Micrococcaceae	ASV6955	2	1.6363e-6	0.03125
d__Bacteria	k__norank_d__Bacteria	p__Actinobacteriota	c__Actinobacteria	o__Micrococcales	f__Micrococcaceae	g__unclassified_f__Micrococcaceae	s__unclassified_f__Micrococcaceae	ASV7547	8	6.54519e-6	0.03125
d__Bacteria	k__norank_d__Bacteria	p__Actinobacteriota	c__Actinobacteria	o__Micrococcales	f__Micrococcaceae	g__unclassified_f__Micrococcaceae	s__unclassified_f__Micrococcaceae	ASV843	3	2.45445e-6	0.03125
d__Bacteria	k__norank_d__Bacteria	p__Actinobacteriota	c__Actinobacteria	o__Micrococcales	f__Micrococcaceae	g__unclassified_f__Micrococcaceae	s__unclassified_f__Micrococcaceae	ASV8748	6	4.90889e-6	0.03125
d__Bacteria	k__norank_d__Bacteria	p__Actinobacteriota	c__Actinobacteria	o__Micrococcales	f__Micrococcaceae	g__unclassified_f__Micrococcaceae	s__unclassified_f__Micrococcaceae	ASV8968	3	2.45445e-6	0.03125
d__Bacteria	k__norank_d__Bacteria	p__Actinobacteriota	c__Actinobacteria	o__Micrococcales	f__Micrococcaceae	g__unclassified_f__Micrococcaceae	s__unclassified_f__Micrococcaceae	ASV913	4	3.27259e-6	0.03125
d__Bacteria	k__norank_d__Bacteria	p__Actinobacteriota	c__Actinobacteria	o__Micrococcales	f__Promicromonosporaceae	g__Cellulosimicrobium	s__unclassified_g__Cellulosimicrobium	ASV1336	386	0.00032	0.1875
d__Bacteria	k__norank_d__Bacteria	p__Actinobacteriota	c__Actinobacteria	o__Micrococcales	f__Promicromonosporaceae	g__Cellulosimicrobium	s__unclassified_g__Cellulosimicrobium	ASV20523	2	1.6363e-6	0.03125
d__Bacteria	k__norank_d__Bacteria	p__Actinobacteriota	c__Actinobacteria	o__Micrococcales	f__Promicromonosporaceae	g__Cellulosimicrobium	s__unclassified_g__Cellulosimicrobium	ASV21779	1	8.18148e-7	0.03125
d__Bacteria	k__norank_d__Bacteria	p__Actinobacteriota	c__Actinobacteria	o__Micrococcales	f__Promicromonosporaceae	g__Cellulosimicrobium	s__unclassified_g__Cellulosimicrobium	ASV25968	15	1.0E-5	0.03125
d__Bacteria	k__norank_d__Bacteria	p__Actinobacteriota	c__Actinobacteria	o__Micrococcales	f__Promicromonosporaceae	g__Cellulosimicrobium	s__unclassified_g__Cellulosimicrobium	ASV26355	1	8.18148e-7	0.03125
d__Bacteria	k__norank_d__Bacteria	p__Actinobacteriota	c__Actinobacteria	o__Micrococcales	f__Promicromonosporaceae	g__Cellulosimicrobium	s__unclassified_g__Cellulosimicrobium	ASV26404	1	8.18148e-7	0.03125
d__Bacteria	k__norank_d__Bacteria	p__Actinobacteriota	c__Actinobacteria	o__Micrococcales	f__Promicromonosporaceae	g__Cellulosimicrobium	s__unclassified_g__Cellulosimicrobium	ASV26437	21	2.0E-5	0.03125
d__Bacteria	k__norank_d__Bacteria	p__Actinobacteriota	c__Actinobacteria	o__Micrococcales	f__Promicromonosporaceae	g__Cellulosimicrobium	s__unclassified_g__Cellulosimicrobium	ASV26535	10	8.18148e-6	0.03125
d__Bacteria	k__norank_d__Bacteria	p__Actinobacteriota	c__Actinobacteria	o__Micrococcales	f__Promicromonosporaceae	g__Cellulosimicrobium	s__unclassified_g__Cellulosimicrobium	ASV27058	1	8.18148e-7	0.03125
d__Bacteria	k__norank_d__Bacteria	p__Actinobacteriota	c__Actinobacteria	o__Micrococcales	f__Promicromonosporaceae	g__Cellulosimicrobium	s__unclassified_g__Cellulosimicrobium	ASV2808	155	0.00013	0.21875
d__Bacteria	k__norank_d__Bacteria	p__Actinobacteriota	c__Actinobacteria	o__Micrococcales	f__Promicromonosporaceae	g__Cellulosimicrobium	s__unclassified_g__Cellulosimicrobium	ASV29667	4	3.27259e-6	0.03125
d__Bacteria	k__norank_d__Bacteria	p__Actinobacteriota	c__Actinobacteria	o__Micrococcales	f__Promicromonosporaceae	g__Cellulosimicrobium	s__unclassified_g__Cellulosimicrobium	ASV586	7	5.72704e-6	0.03125
d__Bacteria	k__norank_d__Bacteria	p__Actinobacteriota	c__Actinobacteria	o__Micrococcales	f__Promicromonosporaceae	g__Cellulosimicrobium	s__unclassified_g__Cellulosimicrobium	ASV8980	3	2.45445e-6	0.03125
d__Bacteria	k__norank_d__Bacteria	p__Actinobacteriota	c__Actinobacteria	o__Micrococcales	f__Promicromonosporaceae	g__Isoptericola	s__unclassified_g__Isoptericola	ASV26785	4	3.27259e-6	0.03125
d__Bacteria	k__norank_d__Bacteria	p__Actinobacteriota	c__Actinobacteria	o__Micrococcales	f__Promicromonosporaceae	g__Isoptericola	s__unclassified_g__Isoptericola	ASV30082	1	8.18148e-7	0.03125
d__Bacteria	k__norank_d__Bacteria	p__Actinobacteriota	c__Actinobacteria	o__Micrococcales	f__Promicromonosporaceae	g__Promicromonospora	s__unclassified_g__Promicromonospora	ASV1360	62	5.0E-5	0.25
d__Bacteria	k__norank_d__Bacteria	p__Actinobacteriota	c__Actinobacteria	o__Micrococcales	f__Promicromonosporaceae	g__Promicromonospora	s__unclassified_g__Promicromonospora	ASV2329	20	2.0E-5	0.0625
d__Bacteria	k__norank_d__Bacteria	p__Actinobacteriota	c__Actinobacteria	o__Micrococcales	f__Promicromonosporaceae	g__unclassified_f__Promicromonosporaceae	s__unclassified_f__Promicromonosporaceae	ASV21075	2	1.6363e-6	0.03125
d__Bacteria	k__norank_d__Bacteria	p__Actinobacteriota	c__Actinobacteria	o__Micrococcales	f__Promicromonosporaceae	g__unclassified_f__Promicromonosporaceae	s__unclassified_f__Promicromonosporaceae	ASV8929	1	8.18148e-7	0.03125
d__Bacteria	k__norank_d__Bacteria	p__Actinobacteriota	c__Actinobacteria	o__Micrococcales	f__Sanguibacteraceae	g__Sanguibacter	s__unclassified_g__Sanguibacter	ASV28364	4	3.27259e-6	0.03125
d__Bacteria	k__norank_d__Bacteria	p__Actinobacteriota	c__Actinobacteria	o__Micrococcales	f__Sanguibacteraceae	g__Sanguibacter	s__unclassified_g__Sanguibacter	ASV8715	5	4.09074e-6	0.03125
d__Bacteria	k__norank_d__Bacteria	p__Actinobacteriota	c__Actinobacteria	o__Micrococcales	f__unclassified_o__Micrococcales	g__unclassified_o__Micrococcales	s__unclassified_o__Micrococcales	ASV20069	11	8.99963e-6	0.0625
d__Bacteria	k__norank_d__Bacteria	p__Actinobacteriota	c__Actinobacteria	o__Micrococcales	f__unclassified_o__Micrococcales	g__unclassified_o__Micrococcales	s__unclassified_o__Micrococcales	ASV20511	1	8.18148e-7	0.03125
d__Bacteria	k__norank_d__Bacteria	p__Actinobacteriota	c__Actinobacteria	o__Micrococcales	f__unclassified_o__Micrococcales	g__unclassified_o__Micrococcales	s__unclassified_o__Micrococcales	ASV20546	2	1.6363e-6	0.03125
d__Bacteria	k__norank_d__Bacteria	p__Actinobacteriota	c__Actinobacteria	o__Micrococcales	f__unclassified_o__Micrococcales	g__unclassified_o__Micrococcales	s__unclassified_o__Micrococcales	ASV20552	1	8.18148e-7	0.03125
d__Bacteria	k__norank_d__Bacteria	p__Actinobacteriota	c__Actinobacteria	o__Micrococcales	f__unclassified_o__Micrococcales	g__unclassified_o__Micrococcales	s__unclassified_o__Micrococcales	ASV21101	2	1.6363e-6	0.03125
d__Bacteria	k__norank_d__Bacteria	p__Actinobacteriota	c__Actinobacteria	o__Micrococcales	f__unclassified_o__Micrococcales	g__unclassified_o__Micrococcales	s__unclassified_o__Micrococcales	ASV21152	1	8.18148e-7	0.03125
d__Bacteria	k__norank_d__Bacteria	p__Actinobacteriota	c__Actinobacteria	o__Micrococcales	f__unclassified_o__Micrococcales	g__unclassified_o__Micrococcales	s__unclassified_o__Micrococcales	ASV21783	2	1.6363e-6	0.03125
d__Bacteria	k__norank_d__Bacteria	p__Actinobacteriota	c__Actinobacteria	o__Micrococcales	f__unclassified_o__Micrococcales	g__unclassified_o__Micrococcales	s__unclassified_o__Micrococcales	ASV22647	3	2.45445e-6	0.03125
d__Bacteria	k__norank_d__Bacteria	p__Actinobacteriota	c__Actinobacteria	o__Micrococcales	f__unclassified_o__Micrococcales	g__unclassified_o__Micrococcales	s__unclassified_o__Micrococcales	ASV22664	2	1.6363e-6	0.03125
d__Bacteria	k__norank_d__Bacteria	p__Actinobacteriota	c__Actinobacteria	o__Micrococcales	f__unclassified_o__Micrococcales	g__unclassified_o__Micrococcales	s__unclassified_o__Micrococcales	ASV22682	2	1.6363e-6	0.03125
d__Bacteria	k__norank_d__Bacteria	p__Actinobacteriota	c__Actinobacteria	o__Micrococcales	f__unclassified_o__Micrococcales	g__unclassified_o__Micrococcales	s__unclassified_o__Micrococcales	ASV22765	1	8.18148e-7	0.03125
d__Bacteria	k__norank_d__Bacteria	p__Actinobacteriota	c__Actinobacteria	o__Micrococcales	f__unclassified_o__Micrococcales	g__unclassified_o__Micrococcales	s__unclassified_o__Micrococcales	ASV22926	2	1.6363e-6	0.03125
d__Bacteria	k__norank_d__Bacteria	p__Actinobacteriota	c__Actinobacteria	o__Micrococcales	f__unclassified_o__Micrococcales	g__unclassified_o__Micrococcales	s__unclassified_o__Micrococcales	ASV23478	4	3.27259e-6	0.03125
d__Bacteria	k__norank_d__Bacteria	p__Actinobacteriota	c__Actinobacteria	o__Micrococcales	f__unclassified_o__Micrococcales	g__unclassified_o__Micrococcales	s__unclassified_o__Micrococcales	ASV23532	2	1.6363e-6	0.03125
d__Bacteria	k__norank_d__Bacteria	p__Actinobacteriota	c__Actinobacteria	o__Micrococcales	f__unclassified_o__Micrococcales	g__unclassified_o__Micrococcales	s__unclassified_o__Micrococcales	ASV25922	2	1.6363e-6	0.03125
d__Bacteria	k__norank_d__Bacteria	p__Actinobacteriota	c__Actinobacteria	o__Micrococcales	f__unclassified_o__Micrococcales	g__unclassified_o__Micrococcales	s__unclassified_o__Micrococcales	ASV25933	2	1.6363e-6	0.03125
d__Bacteria	k__norank_d__Bacteria	p__Actinobacteriota	c__Actinobacteria	o__Micrococcales	f__unclassified_o__Micrococcales	g__unclassified_o__Micrococcales	s__unclassified_o__Micrococcales	ASV26815	3	2.45445e-6	0.03125
d__Bacteria	k__norank_d__Bacteria	p__Actinobacteriota	c__Actinobacteria	o__Micrococcales	f__unclassified_o__Micrococcales	g__unclassified_o__Micrococcales	s__unclassified_o__Micrococcales	ASV26958	2	1.6363e-6	0.03125
d__Bacteria	k__norank_d__Bacteria	p__Actinobacteriota	c__Actinobacteria	o__Micrococcales	f__unclassified_o__Micrococcales	g__unclassified_o__Micrococcales	s__unclassified_o__Micrococcales	ASV26979	1	8.18148e-7	0.03125
d__Bacteria	k__norank_d__Bacteria	p__Actinobacteriota	c__Actinobacteria	o__Micrococcales	f__unclassified_o__Micrococcales	g__unclassified_o__Micrococcales	s__unclassified_o__Micrococcales	ASV27105	2	1.6363e-6	0.03125
d__Bacteria	k__norank_d__Bacteria	p__Actinobacteriota	c__Actinobacteria	o__Micrococcales	f__unclassified_o__Micrococcales	g__unclassified_o__Micrococcales	s__unclassified_o__Micrococcales	ASV27113	1	8.18148e-7	0.03125
d__Bacteria	k__norank_d__Bacteria	p__Actinobacteriota	c__Actinobacteria	o__Micrococcales	f__unclassified_o__Micrococcales	g__unclassified_o__Micrococcales	s__unclassified_o__Micrococcales	ASV27130	2	1.6363e-6	0.03125
d__Bacteria	k__norank_d__Bacteria	p__Actinobacteriota	c__Actinobacteria	o__Micrococcales	f__unclassified_o__Micrococcales	g__unclassified_o__Micrococcales	s__unclassified_o__Micrococcales	ASV28431	2	1.6363e-6	0.03125
d__Bacteria	k__norank_d__Bacteria	p__Actinobacteriota	c__Actinobacteria	o__Micrococcales	f__unclassified_o__Micrococcales	g__unclassified_o__Micrococcales	s__unclassified_o__Micrococcales	ASV29241	4	3.27259e-6	0.03125
d__Bacteria	k__norank_d__Bacteria	p__Actinobacteriota	c__Actinobacteria	o__Micrococcales	f__unclassified_o__Micrococcales	g__unclassified_o__Micrococcales	s__unclassified_o__Micrococcales	ASV29362	2	1.6363e-6	0.03125
d__Bacteria	k__norank_d__Bacteria	p__Actinobacteriota	c__Actinobacteria	o__Micrococcales	f__unclassified_o__Micrococcales	g__unclassified_o__Micrococcales	s__unclassified_o__Micrococcales	ASV29719	3	2.45445e-6	0.03125
d__Bacteria	k__norank_d__Bacteria	p__Actinobacteriota	c__Actinobacteria	o__Micrococcales	f__unclassified_o__Micrococcales	g__unclassified_o__Micrococcales	s__unclassified_o__Micrococcales	ASV29868	1	8.18148e-7	0.03125
d__Bacteria	k__norank_d__Bacteria	p__Actinobacteriota	c__Actinobacteria	o__Micrococcales	f__unclassified_o__Micrococcales	g__unclassified_o__Micrococcales	s__unclassified_o__Micrococcales	ASV29921	1	8.18148e-7	0.03125
d__Bacteria	k__norank_d__Bacteria	p__Actinobacteriota	c__Actinobacteria	o__Micrococcales	f__unclassified_o__Micrococcales	g__unclassified_o__Micrococcales	s__unclassified_o__Micrococcales	ASV32634	2	1.6363e-6	0.03125
d__Bacteria	k__norank_d__Bacteria	p__Actinobacteriota	c__Actinobacteria	o__Micrococcales	f__unclassified_o__Micrococcales	g__unclassified_o__Micrococcales	s__unclassified_o__Micrococcales	ASV3328	4	3.27259e-6	0.03125
d__Bacteria	k__norank_d__Bacteria	p__Actinobacteriota	c__Actinobacteria	o__Micrococcales	f__unclassified_o__Micrococcales	g__unclassified_o__Micrococcales	s__unclassified_o__Micrococcales	ASV448	9	7.36334e-6	0.03125
d__Bacteria	k__norank_d__Bacteria	p__Actinobacteriota	c__Actinobacteria	o__Micrococcales	f__unclassified_o__Micrococcales	g__unclassified_o__Micrococcales	s__unclassified_o__Micrococcales	ASV6087	6	4.90889e-6	0.03125
d__Bacteria	k__norank_d__Bacteria	p__Actinobacteriota	c__Actinobacteria	o__Micrococcales	f__unclassified_o__Micrococcales	g__unclassified_o__Micrococcales	s__unclassified_o__Micrococcales	ASV6324	2	1.6363e-6	0.03125
d__Bacteria	k__norank_d__Bacteria	p__Actinobacteriota	c__Actinobacteria	o__Micrococcales	f__unclassified_o__Micrococcales	g__unclassified_o__Micrococcales	s__unclassified_o__Micrococcales	ASV6993	2	1.6363e-6	0.03125
d__Bacteria	k__norank_d__Bacteria	p__Actinobacteriota	c__Actinobacteria	o__Micrococcales	f__unclassified_o__Micrococcales	g__unclassified_o__Micrococcales	s__unclassified_o__Micrococcales	ASV7356	3	2.45445e-6	0.03125
d__Bacteria	k__norank_d__Bacteria	p__Actinobacteriota	c__Actinobacteria	o__Micrococcales	f__unclassified_o__Micrococcales	g__unclassified_o__Micrococcales	s__unclassified_o__Micrococcales	ASV7394	2	1.6363e-6	0.03125
d__Bacteria	k__norank_d__Bacteria	p__Actinobacteriota	c__Actinobacteria	o__Micrococcales	f__unclassified_o__Micrococcales	g__unclassified_o__Micrococcales	s__unclassified_o__Micrococcales	ASV7439	2	1.6363e-6	0.03125
d__Bacteria	k__norank_d__Bacteria	p__Actinobacteriota	c__Actinobacteria	o__Micrococcales	f__unclassified_o__Micrococcales	g__unclassified_o__Micrococcales	s__unclassified_o__Micrococcales	ASV8567	28	2.0E-5	0.03125
d__Bacteria	k__norank_d__Bacteria	p__Actinobacteriota	c__Actinobacteria	o__Micromonosporales	f__Micromonosporaceae	g__Actinocatenispora	s__unclassified_g__Actinocatenispora	ASV20703	9	7.36334e-6	0.03125
d__Bacteria	k__norank_d__Bacteria	p__Actinobacteriota	c__Actinobacteria	o__Micromonosporales	f__Micromonosporaceae	g__Actinoplanes	s__Actinoplanes_derwentensis	ASV21588	1	8.18148e-7	0.03125
d__Bacteria	k__norank_d__Bacteria	p__Actinobacteriota	c__Actinobacteria	o__Micromonosporales	f__Micromonosporaceae	g__Actinoplanes	s__unclassified_g__Actinoplanes	ASV113	50	4.0E-5	0.03125
d__Bacteria	k__norank_d__Bacteria	p__Actinobacteriota	c__Actinobacteria	o__Micromonosporales	f__Micromonosporaceae	g__Actinoplanes	s__unclassified_g__Actinoplanes	ASV1473	45	4.0E-5	0.09375
d__Bacteria	k__norank_d__Bacteria	p__Actinobacteriota	c__Actinobacteria	o__Micromonosporales	f__Micromonosporaceae	g__Actinoplanes	s__unclassified_g__Actinoplanes	ASV20587	33	3.0E-5	0.03125
d__Bacteria	k__norank_d__Bacteria	p__Actinobacteriota	c__Actinobacteria	o__Micromonosporales	f__Micromonosporaceae	g__Actinoplanes	s__unclassified_g__Actinoplanes	ASV20644	10	8.18148e-6	0.03125
d__Bacteria	k__norank_d__Bacteria	p__Actinobacteriota	c__Actinobacteria	o__Micromonosporales	f__Micromonosporaceae	g__Actinoplanes	s__unclassified_g__Actinoplanes	ASV20816	5	4.09074e-6	0.03125
d__Bacteria	k__norank_d__Bacteria	p__Actinobacteriota	c__Actinobacteria	o__Micromonosporales	f__Micromonosporaceae	g__Actinoplanes	s__unclassified_g__Actinoplanes	ASV226	29	2.0E-5	0.03125
d__Bacteria	k__norank_d__Bacteria	p__Actinobacteriota	c__Actinobacteria	o__Micromonosporales	f__Micromonosporaceae	g__Actinoplanes	s__unclassified_g__Actinoplanes	ASV26106	4	3.27259e-6	0.03125
d__Bacteria	k__norank_d__Bacteria	p__Actinobacteriota	c__Actinobacteria	o__Micromonosporales	f__Micromonosporaceae	g__Actinoplanes	s__unclassified_g__Actinoplanes	ASV26130	4	3.27259e-6	0.03125
d__Bacteria	k__norank_d__Bacteria	p__Actinobacteriota	c__Actinobacteria	o__Micromonosporales	f__Micromonosporaceae	g__Actinoplanes	s__unclassified_g__Actinoplanes	ASV29224	4	3.27259e-6	0.03125
d__Bacteria	k__norank_d__Bacteria	p__Actinobacteriota	c__Actinobacteria	o__Micromonosporales	f__Micromonosporaceae	g__Actinoplanes	s__unclassified_g__Actinoplanes	ASV29266	4	3.27259e-6	0.03125
d__Bacteria	k__norank_d__Bacteria	p__Actinobacteriota	c__Actinobacteria	o__Micromonosporales	f__Micromonosporaceae	g__Actinoplanes	s__unclassified_g__Actinoplanes	ASV2933	5	4.09074e-6	0.03125
d__Bacteria	k__norank_d__Bacteria	p__Actinobacteriota	c__Actinobacteria	o__Micromonosporales	f__Micromonosporaceae	g__Actinoplanes	s__unclassified_g__Actinoplanes	ASV2935	68	6.0E-5	0.1875
d__Bacteria	k__norank_d__Bacteria	p__Actinobacteriota	c__Actinobacteria	o__Micromonosporales	f__Micromonosporaceae	g__Actinoplanes	s__unclassified_g__Actinoplanes	ASV32606	3	2.45445e-6	0.03125
d__Bacteria	k__norank_d__Bacteria	p__Actinobacteriota	c__Actinobacteria	o__Micromonosporales	f__Micromonosporaceae	g__Actinoplanes	s__unclassified_g__Actinoplanes	ASV393	71	6.0E-5	0.09375
d__Bacteria	k__norank_d__Bacteria	p__Actinobacteriota	c__Actinobacteria	o__Micromonosporales	f__Micromonosporaceae	g__Actinoplanes	s__unclassified_g__Actinoplanes	ASV404	144	0.00012	0.25
d__Bacteria	k__norank_d__Bacteria	p__Actinobacteriota	c__Actinobacteria	o__Micromonosporales	f__Micromonosporaceae	g__Actinoplanes	s__unclassified_g__Actinoplanes	ASV4258	57	5.0E-5	0.03125
d__Bacteria	k__norank_d__Bacteria	p__Actinobacteriota	c__Actinobacteria	o__Micromonosporales	f__Micromonosporaceae	g__Actinoplanes	s__unclassified_g__Actinoplanes	ASV4318	19	2.0E-5	0.03125
d__Bacteria	k__norank_d__Bacteria	p__Actinobacteriota	c__Actinobacteria	o__Micromonosporales	f__Micromonosporaceae	g__Actinoplanes	s__unclassified_g__Actinoplanes	ASV4410	12	9.81778e-6	0.03125
d__Bacteria	k__norank_d__Bacteria	p__Actinobacteriota	c__Actinobacteria	o__Micromonosporales	f__Micromonosporaceae	g__Actinoplanes	s__unclassified_g__Actinoplanes	ASV5857	62	5.0E-5	0.0625
d__Bacteria	k__norank_d__Bacteria	p__Actinobacteriota	c__Actinobacteria	o__Micromonosporales	f__Micromonosporaceae	g__Actinoplanes	s__unclassified_g__Actinoplanes	ASV591	75	6.0E-5	0.15625
d__Bacteria	k__norank_d__Bacteria	p__Actinobacteriota	c__Actinobacteria	o__Micromonosporales	f__Micromonosporaceae	g__Actinoplanes	s__unclassified_g__Actinoplanes	ASV6756	145	0.00012	0.0625
d__Bacteria	k__norank_d__Bacteria	p__Actinobacteriota	c__Actinobacteria	o__Micromonosporales	f__Micromonosporaceae	g__Actinoplanes	s__unclassified_g__Actinoplanes	ASV6825	15	1.0E-5	0.0625
d__Bacteria	k__norank_d__Bacteria	p__Actinobacteriota	c__Actinobacteria	o__Micromonosporales	f__Micromonosporaceae	g__Actinoplanes	s__unclassified_g__Actinoplanes	ASV7036	79	6.0E-5	0.0625
d__Bacteria	k__norank_d__Bacteria	p__Actinobacteriota	c__Actinobacteria	o__Micromonosporales	f__Micromonosporaceae	g__Actinoplanes	s__unclassified_g__Actinoplanes	ASV7350	3	2.45445e-6	0.03125
d__Bacteria	k__norank_d__Bacteria	p__Actinobacteriota	c__Actinobacteria	o__Micromonosporales	f__Micromonosporaceae	g__Actinoplanes	s__unclassified_g__Actinoplanes	ASV7535	14	1.0E-5	0.03125
d__Bacteria	k__norank_d__Bacteria	p__Actinobacteriota	c__Actinobacteria	o__Micromonosporales	f__Micromonosporaceae	g__Actinoplanes	s__unclassified_g__Actinoplanes	ASV8594	80	7.0E-5	0.15625
d__Bacteria	k__norank_d__Bacteria	p__Actinobacteriota	c__Actinobacteria	o__Micromonosporales	f__Micromonosporaceae	g__Actinoplanes	s__unclassified_g__Actinoplanes	ASV89	84	7.0E-5	0.0625
d__Bacteria	k__norank_d__Bacteria	p__Actinobacteriota	c__Actinobacteria	o__Micromonosporales	f__Micromonosporaceae	g__Asanoa	s__uncultured_bacterium_g__Asanoa	ASV662	6	4.90889e-6	0.03125
d__Bacteria	k__norank_d__Bacteria	p__Actinobacteriota	c__Actinobacteria	o__Micromonosporales	f__Micromonosporaceae	g__Catellatospora	s__Catellatospora_citrea	ASV4619	5	4.09074e-6	0.03125
d__Bacteria	k__norank_d__Bacteria	p__Actinobacteriota	c__Actinobacteria	o__Micromonosporales	f__Micromonosporaceae	g__Catellatospora	s__Catellatospora_sp._RI59-SDHV-102	ASV21242	43	4.0E-5	0.0625
d__Bacteria	k__norank_d__Bacteria	p__Actinobacteriota	c__Actinobacteria	o__Micromonosporales	f__Micromonosporaceae	g__Catellatospora	s__Catellatospora_sp._RI59-SDHV-102	ASV22231	16	1.0E-5	0.03125
d__Bacteria	k__norank_d__Bacteria	p__Actinobacteriota	c__Actinobacteria	o__Micromonosporales	f__Micromonosporaceae	g__Catellatospora	s__Catellatospora_sp._RI59-SDHV-102	ASV3203	42	3.0E-5	0.09375
d__Bacteria	k__norank_d__Bacteria	p__Actinobacteriota	c__Actinobacteria	o__Micromonosporales	f__Micromonosporaceae	g__Catellatospora	s__unclassified_g__Catellatospora	ASV20720	13	1.0E-5	0.03125
d__Bacteria	k__norank_d__Bacteria	p__Actinobacteriota	c__Actinobacteria	o__Micromonosporales	f__Micromonosporaceae	g__Catellatospora	s__unclassified_g__Catellatospora	ASV22622	2	1.6363e-6	0.03125
d__Bacteria	k__norank_d__Bacteria	p__Actinobacteriota	c__Actinobacteria	o__Micromonosporales	f__Micromonosporaceae	g__Catellatospora	s__unclassified_g__Catellatospora	ASV29509	5	4.09074e-6	0.03125
d__Bacteria	k__norank_d__Bacteria	p__Actinobacteriota	c__Actinobacteria	o__Micromonosporales	f__Micromonosporaceae	g__Catellatospora	s__unclassified_g__Catellatospora	ASV3339	6	4.90889e-6	0.03125
d__Bacteria	k__norank_d__Bacteria	p__Actinobacteriota	c__Actinobacteria	o__Micromonosporales	f__Micromonosporaceae	g__Catellatospora	s__unclassified_g__Catellatospora	ASV443	14	1.0E-5	0.0625
d__Bacteria	k__norank_d__Bacteria	p__Actinobacteriota	c__Actinobacteria	o__Micromonosporales	f__Micromonosporaceae	g__Dactylosporangium	s__unclassified_g__Dactylosporangium	ASV22196	27	2.0E-5	0.03125
d__Bacteria	k__norank_d__Bacteria	p__Actinobacteriota	c__Actinobacteria	o__Micromonosporales	f__Micromonosporaceae	g__Dactylosporangium	s__unclassified_g__Dactylosporangium	ASV2328	41	3.0E-5	0.125
d__Bacteria	k__norank_d__Bacteria	p__Actinobacteriota	c__Actinobacteria	o__Micromonosporales	f__Micromonosporaceae	g__Dactylosporangium	s__unclassified_g__Dactylosporangium	ASV3037	28	2.0E-5	0.09375
d__Bacteria	k__norank_d__Bacteria	p__Actinobacteriota	c__Actinobacteria	o__Micromonosporales	f__Micromonosporaceae	g__Hamadaea	s__unclassified_g__Hamadaea	ASV29393	18	1.0E-5	0.03125
d__Bacteria	k__norank_d__Bacteria	p__Actinobacteriota	c__Actinobacteria	o__Micromonosporales	f__Micromonosporaceae	g__Hamadaea	s__unclassified_g__Hamadaea	ASV4474	8	6.54519e-6	0.03125
d__Bacteria	k__norank_d__Bacteria	p__Actinobacteriota	c__Actinobacteria	o__Micromonosporales	f__Micromonosporaceae	g__Hamadaea	s__unclassified_g__Hamadaea	ASV770	78	6.0E-5	0.25
d__Bacteria	k__norank_d__Bacteria	p__Actinobacteriota	c__Actinobacteria	o__Micromonosporales	f__Micromonosporaceae	g__Luedemannella	s__unclassified_g__Luedemannella	ASV21256	12	9.81778e-6	0.03125
d__Bacteria	k__norank_d__Bacteria	p__Actinobacteriota	c__Actinobacteria	o__Micromonosporales	f__Micromonosporaceae	g__Luedemannella	s__unclassified_g__Luedemannella	ASV2375	27	2.0E-5	0.03125
d__Bacteria	k__norank_d__Bacteria	p__Actinobacteriota	c__Actinobacteria	o__Micromonosporales	f__Micromonosporaceae	g__Luedemannella	s__uncultured_bacterium_g__Luedemannella	ASV1317	108	9.0E-5	0.09375
d__Bacteria	k__norank_d__Bacteria	p__Actinobacteriota	c__Actinobacteria	o__Micromonosporales	f__Micromonosporaceae	g__Luedemannella	s__uncultured_bacterium_g__Luedemannella	ASV20642	15	1.0E-5	0.03125
d__Bacteria	k__norank_d__Bacteria	p__Actinobacteriota	c__Actinobacteria	o__Micromonosporales	f__Micromonosporaceae	g__Luedemannella	s__uncultured_bacterium_g__Luedemannella	ASV21206	18	1.0E-5	0.03125
d__Bacteria	k__norank_d__Bacteria	p__Actinobacteriota	c__Actinobacteria	o__Micromonosporales	f__Micromonosporaceae	g__Luedemannella	s__uncultured_bacterium_g__Luedemannella	ASV21321	11	8.99963e-6	0.03125
d__Bacteria	k__norank_d__Bacteria	p__Actinobacteriota	c__Actinobacteria	o__Micromonosporales	f__Micromonosporaceae	g__Luedemannella	s__uncultured_bacterium_g__Luedemannella	ASV2327	183	0.00015	0.09375
d__Bacteria	k__norank_d__Bacteria	p__Actinobacteriota	c__Actinobacteria	o__Micromonosporales	f__Micromonosporaceae	g__Luedemannella	s__uncultured_bacterium_g__Luedemannella	ASV2376	32	3.0E-5	0.0625
d__Bacteria	k__norank_d__Bacteria	p__Actinobacteriota	c__Actinobacteria	o__Micromonosporales	f__Micromonosporaceae	g__Luedemannella	s__uncultured_bacterium_g__Luedemannella	ASV239	176	0.00014	0.15625
d__Bacteria	k__norank_d__Bacteria	p__Actinobacteriota	c__Actinobacteria	o__Micromonosporales	f__Micromonosporaceae	g__Luedemannella	s__uncultured_bacterium_g__Luedemannella	ASV2961	245	0.0002	0.1875
d__Bacteria	k__norank_d__Bacteria	p__Actinobacteriota	c__Actinobacteria	o__Micromonosporales	f__Micromonosporaceae	g__Luedemannella	s__uncultured_bacterium_g__Luedemannella	ASV3016	51	4.0E-5	0.125
d__Bacteria	k__norank_d__Bacteria	p__Actinobacteriota	c__Actinobacteria	o__Micromonosporales	f__Micromonosporaceae	g__Micromonospora	s__unclassified_g__Micromonospora	ASV20375	1	8.18148e-7	0.03125
d__Bacteria	k__norank_d__Bacteria	p__Actinobacteriota	c__Actinobacteria	o__Micromonosporales	f__Micromonosporaceae	g__Micromonospora	s__unclassified_g__Micromonospora	ASV20729	9	7.36334e-6	0.03125
d__Bacteria	k__norank_d__Bacteria	p__Actinobacteriota	c__Actinobacteria	o__Micromonosporales	f__Micromonosporaceae	g__Micromonospora	s__unclassified_g__Micromonospora	ASV20759	6	4.90889e-6	0.03125
d__Bacteria	k__norank_d__Bacteria	p__Actinobacteriota	c__Actinobacteria	o__Micromonosporales	f__Micromonosporaceae	g__Micromonospora	s__unclassified_g__Micromonospora	ASV21024	1	8.18148e-7	0.03125
d__Bacteria	k__norank_d__Bacteria	p__Actinobacteriota	c__Actinobacteria	o__Micromonosporales	f__Micromonosporaceae	g__Micromonospora	s__unclassified_g__Micromonospora	ASV21034	3	2.45445e-6	0.03125
d__Bacteria	k__norank_d__Bacteria	p__Actinobacteriota	c__Actinobacteria	o__Micromonosporales	f__Micromonosporaceae	g__Micromonospora	s__unclassified_g__Micromonospora	ASV21048	1	8.18148e-7	0.03125
d__Bacteria	k__norank_d__Bacteria	p__Actinobacteriota	c__Actinobacteria	o__Micromonosporales	f__Micromonosporaceae	g__Micromonospora	s__unclassified_g__Micromonospora	ASV22308	58	5.0E-5	0.0625
d__Bacteria	k__norank_d__Bacteria	p__Actinobacteriota	c__Actinobacteria	o__Micromonosporales	f__Micromonosporaceae	g__Micromonospora	s__unclassified_g__Micromonospora	ASV23213	17	1.0E-5	0.03125
d__Bacteria	k__norank_d__Bacteria	p__Actinobacteriota	c__Actinobacteria	o__Micromonosporales	f__Micromonosporaceae	g__Micromonospora	s__unclassified_g__Micromonospora	ASV25901	3	2.45445e-6	0.03125
d__Bacteria	k__norank_d__Bacteria	p__Actinobacteriota	c__Actinobacteria	o__Micromonosporales	f__Micromonosporaceae	g__Micromonospora	s__unclassified_g__Micromonospora	ASV26285	2	1.6363e-6	0.03125
d__Bacteria	k__norank_d__Bacteria	p__Actinobacteriota	c__Actinobacteria	o__Micromonosporales	f__Micromonosporaceae	g__Micromonospora	s__unclassified_g__Micromonospora	ASV26440	27	2.0E-5	0.03125
d__Bacteria	k__norank_d__Bacteria	p__Actinobacteriota	c__Actinobacteria	o__Micromonosporales	f__Micromonosporaceae	g__Micromonospora	s__unclassified_g__Micromonospora	ASV26538	10	8.18148e-6	0.03125
d__Bacteria	k__norank_d__Bacteria	p__Actinobacteriota	c__Actinobacteria	o__Micromonosporales	f__Micromonosporaceae	g__Micromonospora	s__unclassified_g__Micromonospora	ASV29171	7	5.72704e-6	0.03125
d__Bacteria	k__norank_d__Bacteria	p__Actinobacteriota	c__Actinobacteria	o__Micromonosporales	f__Micromonosporaceae	g__Micromonospora	s__unclassified_g__Micromonospora	ASV29213	5	4.09074e-6	0.03125
d__Bacteria	k__norank_d__Bacteria	p__Actinobacteriota	c__Actinobacteria	o__Micromonosporales	f__Micromonosporaceae	g__Micromonospora	s__unclassified_g__Micromonospora	ASV29424	12	9.81778e-6	0.03125
d__Bacteria	k__norank_d__Bacteria	p__Actinobacteriota	c__Actinobacteria	o__Micromonosporales	f__Micromonosporaceae	g__Micromonospora	s__unclassified_g__Micromonospora	ASV3098	33	3.0E-5	0.03125
d__Bacteria	k__norank_d__Bacteria	p__Actinobacteriota	c__Actinobacteria	o__Micromonosporales	f__Micromonosporaceae	g__Micromonospora	s__unclassified_g__Micromonospora	ASV3174	33	3.0E-5	0.09375
d__Bacteria	k__norank_d__Bacteria	p__Actinobacteriota	c__Actinobacteria	o__Micromonosporales	f__Micromonosporaceae	g__Micromonospora	s__unclassified_g__Micromonospora	ASV32479	9	7.36334e-6	0.03125
d__Bacteria	k__norank_d__Bacteria	p__Actinobacteriota	c__Actinobacteria	o__Micromonosporales	f__Micromonosporaceae	g__Micromonospora	s__unclassified_g__Micromonospora	ASV32569	4	3.27259e-6	0.03125
d__Bacteria	k__norank_d__Bacteria	p__Actinobacteriota	c__Actinobacteria	o__Micromonosporales	f__Micromonosporaceae	g__Micromonospora	s__unclassified_g__Micromonospora	ASV32579	2	1.6363e-6	0.03125
d__Bacteria	k__norank_d__Bacteria	p__Actinobacteriota	c__Actinobacteria	o__Micromonosporales	f__Micromonosporaceae	g__Micromonospora	s__unclassified_g__Micromonospora	ASV3335	20	2.0E-5	0.09375
d__Bacteria	k__norank_d__Bacteria	p__Actinobacteriota	c__Actinobacteria	o__Micromonosporales	f__Micromonosporaceae	g__Micromonospora	s__unclassified_g__Micromonospora	ASV372	38	3.0E-5	0.0625
d__Bacteria	k__norank_d__Bacteria	p__Actinobacteriota	c__Actinobacteria	o__Micromonosporales	f__Micromonosporaceae	g__Micromonospora	s__unclassified_g__Micromonospora	ASV4286	161	0.00013	0.21875
d__Bacteria	k__norank_d__Bacteria	p__Actinobacteriota	c__Actinobacteria	o__Micromonosporales	f__Micromonosporaceae	g__Micromonospora	s__unclassified_g__Micromonospora	ASV525	10	8.18148e-6	0.03125
d__Bacteria	k__norank_d__Bacteria	p__Actinobacteriota	c__Actinobacteria	o__Micromonosporales	f__Micromonosporaceae	g__Micromonospora	s__unclassified_g__Micromonospora	ASV61	261	0.00021	0.15625
d__Bacteria	k__norank_d__Bacteria	p__Actinobacteriota	c__Actinobacteria	o__Micromonosporales	f__Micromonosporaceae	g__Micromonospora	s__unclassified_g__Micromonospora	ASV6814	10	8.18148e-6	0.03125
d__Bacteria	k__norank_d__Bacteria	p__Actinobacteriota	c__Actinobacteria	o__Micromonosporales	f__Micromonosporaceae	g__Micromonospora	s__unclassified_g__Micromonospora	ASV6830	9	7.36334e-6	0.03125
d__Bacteria	k__norank_d__Bacteria	p__Actinobacteriota	c__Actinobacteria	o__Micromonosporales	f__Micromonosporaceae	g__Micromonospora	s__unclassified_g__Micromonospora	ASV6879	4	3.27259e-6	0.03125
d__Bacteria	k__norank_d__Bacteria	p__Actinobacteriota	c__Actinobacteria	o__Micromonosporales	f__Micromonosporaceae	g__Micromonospora	s__unclassified_g__Micromonospora	ASV6971	2	1.6363e-6	0.03125
d__Bacteria	k__norank_d__Bacteria	p__Actinobacteriota	c__Actinobacteria	o__Micromonosporales	f__Micromonosporaceae	g__Micromonospora	s__unclassified_g__Micromonospora	ASV7029	2	1.6363e-6	0.03125
d__Bacteria	k__norank_d__Bacteria	p__Actinobacteriota	c__Actinobacteria	o__Micromonosporales	f__Micromonosporaceae	g__Micromonospora	s__unclassified_g__Micromonospora	ASV7142	9	7.36334e-6	0.03125
d__Bacteria	k__norank_d__Bacteria	p__Actinobacteriota	c__Actinobacteria	o__Micromonosporales	f__Micromonosporaceae	g__Micromonospora	s__uncultured_actinobacterium_g__Micromonospora	ASV8761	5	4.09074e-6	0.03125
d__Bacteria	k__norank_d__Bacteria	p__Actinobacteriota	c__Actinobacteria	o__Micromonosporales	f__Micromonosporaceae	g__Phytomonospora	s__unclassified_g__Phytomonospora	ASV29488	7	5.72704e-6	0.03125
d__Bacteria	k__norank_d__Bacteria	p__Actinobacteriota	c__Actinobacteria	o__Micromonosporales	f__Micromonosporaceae	g__Plantactinospora	s__unclassified_g__Plantactinospora	ASV3093	62	5.0E-5	0.125
d__Bacteria	k__norank_d__Bacteria	p__Actinobacteriota	c__Actinobacteria	o__Micromonosporales	f__Micromonosporaceae	g__Rhizocola	s__Rhizocola_hellebori	ASV486	44	4.0E-5	0.09375
d__Bacteria	k__norank_d__Bacteria	p__Actinobacteriota	c__Actinobacteria	o__Micromonosporales	f__Micromonosporaceae	g__Salinispora	s__uncultured_Micromonospora_sp._g__Salinispora	ASV8941	1	8.18148e-7	0.03125
d__Bacteria	k__norank_d__Bacteria	p__Actinobacteriota	c__Actinobacteria	o__Micromonosporales	f__Micromonosporaceae	g__Stackebrandtia	s__unclassified_g__Stackebrandtia	ASV2031	70	6.0E-5	0.0625
d__Bacteria	k__norank_d__Bacteria	p__Actinobacteriota	c__Actinobacteria	o__Micromonosporales	f__Micromonosporaceae	g__Stackebrandtia	s__unclassified_g__Stackebrandtia	ASV23369	7	5.72704e-6	0.03125
d__Bacteria	k__norank_d__Bacteria	p__Actinobacteriota	c__Actinobacteria	o__Micromonosporales	f__Micromonosporaceae	g__norank_f__Micromonosporaceae	s__metagenome_f__Micromonosporaceae	ASV3060	246	0.0002	0.1875
d__Bacteria	k__norank_d__Bacteria	p__Actinobacteriota	c__Actinobacteria	o__Micromonosporales	f__Micromonosporaceae	g__norank_f__Micromonosporaceae	s__unclassified_g__norank_f__Micromonosporaceae	ASV23211	48	4.0E-5	0.0625
d__Bacteria	k__norank_d__Bacteria	p__Actinobacteriota	c__Actinobacteria	o__Micromonosporales	f__Micromonosporaceae	g__norank_f__Micromonosporaceae	s__unclassified_g__norank_f__Micromonosporaceae	ASV2360	43	4.0E-5	0.0625
d__Bacteria	k__norank_d__Bacteria	p__Actinobacteriota	c__Actinobacteria	o__Micromonosporales	f__Micromonosporaceae	g__norank_f__Micromonosporaceae	s__unclassified_g__norank_f__Micromonosporaceae	ASV29435	9	7.36334e-6	0.03125
d__Bacteria	k__norank_d__Bacteria	p__Actinobacteriota	c__Actinobacteria	o__Micromonosporales	f__Micromonosporaceae	g__norank_f__Micromonosporaceae	s__unclassified_g__norank_f__Micromonosporaceae	ASV4243	348	0.00028	0.25
d__Bacteria	k__norank_d__Bacteria	p__Actinobacteriota	c__Actinobacteria	o__Micromonosporales	f__Micromonosporaceae	g__norank_f__Micromonosporaceae	s__uncultured_compost_bacterium_f__Micromonosporaceae	ASV7482	28	2.0E-5	0.125
d__Bacteria	k__norank_d__Bacteria	p__Actinobacteriota	c__Actinobacteria	o__Micromonosporales	f__Micromonosporaceae	g__unclassified_f__Micromonosporaceae	s__unclassified_f__Micromonosporaceae	ASV1043	2	1.6363e-6	0.03125
d__Bacteria	k__norank_d__Bacteria	p__Actinobacteriota	c__Actinobacteria	o__Micromonosporales	f__Micromonosporaceae	g__unclassified_f__Micromonosporaceae	s__unclassified_f__Micromonosporaceae	ASV1240	1	8.18148e-7	0.03125
d__Bacteria	k__norank_d__Bacteria	p__Actinobacteriota	c__Actinobacteria	o__Micromonosporales	f__Micromonosporaceae	g__unclassified_f__Micromonosporaceae	s__unclassified_f__Micromonosporaceae	ASV1345	488	0.0004	0.34375
d__Bacteria	k__norank_d__Bacteria	p__Actinobacteriota	c__Actinobacteria	o__Micromonosporales	f__Micromonosporaceae	g__unclassified_f__Micromonosporaceae	s__unclassified_f__Micromonosporaceae	ASV1399	288	0.00024	0.3125
d__Bacteria	k__norank_d__Bacteria	p__Actinobacteriota	c__Actinobacteria	o__Micromonosporales	f__Micromonosporaceae	g__unclassified_f__Micromonosporaceae	s__unclassified_f__Micromonosporaceae	ASV1605	59	5.0E-5	0.1875
d__Bacteria	k__norank_d__Bacteria	p__Actinobacteriota	c__Actinobacteria	o__Micromonosporales	f__Micromonosporaceae	g__unclassified_f__Micromonosporaceae	s__unclassified_f__Micromonosporaceae	ASV1630	80	7.0E-5	0.1875
d__Bacteria	k__norank_d__Bacteria	p__Actinobacteriota	c__Actinobacteria	o__Micromonosporales	f__Micromonosporaceae	g__unclassified_f__Micromonosporaceae	s__unclassified_f__Micromonosporaceae	ASV1661	25	2.0E-5	0.03125
d__Bacteria	k__norank_d__Bacteria	p__Actinobacteriota	c__Actinobacteria	o__Micromonosporales	f__Micromonosporaceae	g__unclassified_f__Micromonosporaceae	s__unclassified_f__Micromonosporaceae	ASV1739	27	2.0E-5	0.03125
d__Bacteria	k__norank_d__Bacteria	p__Actinobacteriota	c__Actinobacteria	o__Micromonosporales	f__Micromonosporaceae	g__unclassified_f__Micromonosporaceae	s__unclassified_f__Micromonosporaceae	ASV178	2564	0.0021	0.5
d__Bacteria	k__norank_d__Bacteria	p__Actinobacteriota	c__Actinobacteria	o__Micromonosporales	f__Micromonosporaceae	g__unclassified_f__Micromonosporaceae	s__unclassified_f__Micromonosporaceae	ASV1812	3	2.45445e-6	0.03125
d__Bacteria	k__norank_d__Bacteria	p__Actinobacteriota	c__Actinobacteria	o__Micromonosporales	f__Micromonosporaceae	g__unclassified_f__Micromonosporaceae	s__unclassified_f__Micromonosporaceae	ASV20065	2	1.6363e-6	0.03125
d__Bacteria	k__norank_d__Bacteria	p__Actinobacteriota	c__Actinobacteria	o__Micromonosporales	f__Micromonosporaceae	g__unclassified_f__Micromonosporaceae	s__unclassified_f__Micromonosporaceae	ASV20094	3	2.45445e-6	0.03125
d__Bacteria	k__norank_d__Bacteria	p__Actinobacteriota	c__Actinobacteria	o__Micromonosporales	f__Micromonosporaceae	g__unclassified_f__Micromonosporaceae	s__unclassified_f__Micromonosporaceae	ASV20322	2	1.6363e-6	0.03125
d__Bacteria	k__norank_d__Bacteria	p__Actinobacteriota	c__Actinobacteria	o__Micromonosporales	f__Micromonosporaceae	g__unclassified_f__Micromonosporaceae	s__unclassified_f__Micromonosporaceae	ASV20423	1	8.18148e-7	0.03125
d__Bacteria	k__norank_d__Bacteria	p__Actinobacteriota	c__Actinobacteria	o__Micromonosporales	f__Micromonosporaceae	g__unclassified_f__Micromonosporaceae	s__unclassified_f__Micromonosporaceae	ASV20441	2	1.6363e-6	0.03125
d__Bacteria	k__norank_d__Bacteria	p__Actinobacteriota	c__Actinobacteria	o__Micromonosporales	f__Micromonosporaceae	g__unclassified_f__Micromonosporaceae	s__unclassified_f__Micromonosporaceae	ASV20613	15	1.0E-5	0.03125
d__Bacteria	k__norank_d__Bacteria	p__Actinobacteriota	c__Actinobacteria	o__Micromonosporales	f__Micromonosporaceae	g__unclassified_f__Micromonosporaceae	s__unclassified_f__Micromonosporaceae	ASV20867	3	2.45445e-6	0.03125
d__Bacteria	k__norank_d__Bacteria	p__Actinobacteriota	c__Actinobacteria	o__Micromonosporales	f__Micromonosporaceae	g__unclassified_f__Micromonosporaceae	s__unclassified_f__Micromonosporaceae	ASV20891	4	3.27259e-6	0.03125
d__Bacteria	k__norank_d__Bacteria	p__Actinobacteriota	c__Actinobacteria	o__Micromonosporales	f__Micromonosporaceae	g__unclassified_f__Micromonosporaceae	s__unclassified_f__Micromonosporaceae	ASV20898	5	4.09074e-6	0.03125
d__Bacteria	k__norank_d__Bacteria	p__Actinobacteriota	c__Actinobacteria	o__Micromonosporales	f__Micromonosporaceae	g__unclassified_f__Micromonosporaceae	s__unclassified_f__Micromonosporaceae	ASV20900	3	2.45445e-6	0.03125
d__Bacteria	k__norank_d__Bacteria	p__Actinobacteriota	c__Actinobacteria	o__Micromonosporales	f__Micromonosporaceae	g__unclassified_f__Micromonosporaceae	s__unclassified_f__Micromonosporaceae	ASV21021	2	1.6363e-6	0.03125
d__Bacteria	k__norank_d__Bacteria	p__Actinobacteriota	c__Actinobacteria	o__Micromonosporales	f__Micromonosporaceae	g__unclassified_f__Micromonosporaceae	s__unclassified_f__Micromonosporaceae	ASV21165	535	0.00044	0.0625
d__Bacteria	k__norank_d__Bacteria	p__Actinobacteriota	c__Actinobacteria	o__Micromonosporales	f__Micromonosporaceae	g__unclassified_f__Micromonosporaceae	s__unclassified_f__Micromonosporaceae	ASV21187	33	3.0E-5	0.03125
d__Bacteria	k__norank_d__Bacteria	p__Actinobacteriota	c__Actinobacteria	o__Micromonosporales	f__Micromonosporaceae	g__unclassified_f__Micromonosporaceae	s__unclassified_f__Micromonosporaceae	ASV21189	27	2.0E-5	0.03125
d__Bacteria	k__norank_d__Bacteria	p__Actinobacteriota	c__Actinobacteria	o__Micromonosporales	f__Micromonosporaceae	g__unclassified_f__Micromonosporaceae	s__unclassified_f__Micromonosporaceae	ASV21218	45	4.0E-5	0.0625
d__Bacteria	k__norank_d__Bacteria	p__Actinobacteriota	c__Actinobacteria	o__Micromonosporales	f__Micromonosporaceae	g__unclassified_f__Micromonosporaceae	s__unclassified_f__Micromonosporaceae	ASV21239	16	1.0E-5	0.03125
d__Bacteria	k__norank_d__Bacteria	p__Actinobacteriota	c__Actinobacteria	o__Micromonosporales	f__Micromonosporaceae	g__unclassified_f__Micromonosporaceae	s__unclassified_f__Micromonosporaceae	ASV21244	16	1.0E-5	0.03125
d__Bacteria	k__norank_d__Bacteria	p__Actinobacteriota	c__Actinobacteria	o__Micromonosporales	f__Micromonosporaceae	g__unclassified_f__Micromonosporaceae	s__unclassified_f__Micromonosporaceae	ASV21257	15	1.0E-5	0.03125
d__Bacteria	k__norank_d__Bacteria	p__Actinobacteriota	c__Actinobacteria	o__Micromonosporales	f__Micromonosporaceae	g__unclassified_f__Micromonosporaceae	s__unclassified_f__Micromonosporaceae	ASV21273	20	2.0E-5	0.0625
d__Bacteria	k__norank_d__Bacteria	p__Actinobacteriota	c__Actinobacteria	o__Micromonosporales	f__Micromonosporaceae	g__unclassified_f__Micromonosporaceae	s__unclassified_f__Micromonosporaceae	ASV213	865	0.00071	0.5
d__Bacteria	k__norank_d__Bacteria	p__Actinobacteriota	c__Actinobacteria	o__Micromonosporales	f__Micromonosporaceae	g__unclassified_f__Micromonosporaceae	s__unclassified_f__Micromonosporaceae	ASV21300	11	8.99963e-6	0.03125
d__Bacteria	k__norank_d__Bacteria	p__Actinobacteriota	c__Actinobacteria	o__Micromonosporales	f__Micromonosporaceae	g__unclassified_f__Micromonosporaceae	s__unclassified_f__Micromonosporaceae	ASV21328	14	1.0E-5	0.03125
d__Bacteria	k__norank_d__Bacteria	p__Actinobacteriota	c__Actinobacteria	o__Micromonosporales	f__Micromonosporaceae	g__unclassified_f__Micromonosporaceae	s__unclassified_f__Micromonosporaceae	ASV21373	10	8.18148e-6	0.03125
d__Bacteria	k__norank_d__Bacteria	p__Actinobacteriota	c__Actinobacteria	o__Micromonosporales	f__Micromonosporaceae	g__unclassified_f__Micromonosporaceae	s__unclassified_f__Micromonosporaceae	ASV21390	7	5.72704e-6	0.03125
d__Bacteria	k__norank_d__Bacteria	p__Actinobacteriota	c__Actinobacteria	o__Micromonosporales	f__Micromonosporaceae	g__unclassified_f__Micromonosporaceae	s__unclassified_f__Micromonosporaceae	ASV21456	7	5.72704e-6	0.03125
d__Bacteria	k__norank_d__Bacteria	p__Actinobacteriota	c__Actinobacteria	o__Micromonosporales	f__Micromonosporaceae	g__unclassified_f__Micromonosporaceae	s__unclassified_f__Micromonosporaceae	ASV21511	3	2.45445e-6	0.03125
d__Bacteria	k__norank_d__Bacteria	p__Actinobacteriota	c__Actinobacteria	o__Micromonosporales	f__Micromonosporaceae	g__unclassified_f__Micromonosporaceae	s__unclassified_f__Micromonosporaceae	ASV21556	3	2.45445e-6	0.03125
d__Bacteria	k__norank_d__Bacteria	p__Actinobacteriota	c__Actinobacteria	o__Micromonosporales	f__Micromonosporaceae	g__unclassified_f__Micromonosporaceae	s__unclassified_f__Micromonosporaceae	ASV21664	2	1.6363e-6	0.03125
d__Bacteria	k__norank_d__Bacteria	p__Actinobacteriota	c__Actinobacteria	o__Micromonosporales	f__Micromonosporaceae	g__unclassified_f__Micromonosporaceae	s__unclassified_f__Micromonosporaceae	ASV21692	2	1.6363e-6	0.03125
d__Bacteria	k__norank_d__Bacteria	p__Actinobacteriota	c__Actinobacteria	o__Micromonosporales	f__Micromonosporaceae	g__unclassified_f__Micromonosporaceae	s__unclassified_f__Micromonosporaceae	ASV21700	2	1.6363e-6	0.03125
d__Bacteria	k__norank_d__Bacteria	p__Actinobacteriota	c__Actinobacteria	o__Micromonosporales	f__Micromonosporaceae	g__unclassified_f__Micromonosporaceae	s__unclassified_f__Micromonosporaceae	ASV21876	2	1.6363e-6	0.03125
d__Bacteria	k__norank_d__Bacteria	p__Actinobacteriota	c__Actinobacteria	o__Micromonosporales	f__Micromonosporaceae	g__unclassified_f__Micromonosporaceae	s__unclassified_f__Micromonosporaceae	ASV21889	2	1.6363e-6	0.03125
d__Bacteria	k__norank_d__Bacteria	p__Actinobacteriota	c__Actinobacteria	o__Micromonosporales	f__Micromonosporaceae	g__unclassified_f__Micromonosporaceae	s__unclassified_f__Micromonosporaceae	ASV22186	138	0.00011	0.03125
d__Bacteria	k__norank_d__Bacteria	p__Actinobacteriota	c__Actinobacteria	o__Micromonosporales	f__Micromonosporaceae	g__unclassified_f__Micromonosporaceae	s__unclassified_f__Micromonosporaceae	ASV22309	9	7.36334e-6	0.03125
d__Bacteria	k__norank_d__Bacteria	p__Actinobacteriota	c__Actinobacteria	o__Micromonosporales	f__Micromonosporaceae	g__unclassified_f__Micromonosporaceae	s__unclassified_f__Micromonosporaceae	ASV22320	9	7.36334e-6	0.03125
d__Bacteria	k__norank_d__Bacteria	p__Actinobacteriota	c__Actinobacteria	o__Micromonosporales	f__Micromonosporaceae	g__unclassified_f__Micromonosporaceae	s__unclassified_f__Micromonosporaceae	ASV22387	4	3.27259e-6	0.03125
d__Bacteria	k__norank_d__Bacteria	p__Actinobacteriota	c__Actinobacteria	o__Micromonosporales	f__Micromonosporaceae	g__unclassified_f__Micromonosporaceae	s__unclassified_f__Micromonosporaceae	ASV22455	7	5.72704e-6	0.03125
d__Bacteria	k__norank_d__Bacteria	p__Actinobacteriota	c__Actinobacteria	o__Micromonosporales	f__Micromonosporaceae	g__unclassified_f__Micromonosporaceae	s__unclassified_f__Micromonosporaceae	ASV22459	6	4.90889e-6	0.03125
d__Bacteria	k__norank_d__Bacteria	p__Actinobacteriota	c__Actinobacteria	o__Micromonosporales	f__Micromonosporaceae	g__unclassified_f__Micromonosporaceae	s__unclassified_f__Micromonosporaceae	ASV22468	4	3.27259e-6	0.03125
d__Bacteria	k__norank_d__Bacteria	p__Actinobacteriota	c__Actinobacteria	o__Micromonosporales	f__Micromonosporaceae	g__unclassified_f__Micromonosporaceae	s__unclassified_f__Micromonosporaceae	ASV22715	2	1.6363e-6	0.03125
d__Bacteria	k__norank_d__Bacteria	p__Actinobacteriota	c__Actinobacteria	o__Micromonosporales	f__Micromonosporaceae	g__unclassified_f__Micromonosporaceae	s__unclassified_f__Micromonosporaceae	ASV22776	3	2.45445e-6	0.03125
d__Bacteria	k__norank_d__Bacteria	p__Actinobacteriota	c__Actinobacteria	o__Micromonosporales	f__Micromonosporaceae	g__unclassified_f__Micromonosporaceae	s__unclassified_f__Micromonosporaceae	ASV22801	2	1.6363e-6	0.03125
d__Bacteria	k__norank_d__Bacteria	p__Actinobacteriota	c__Actinobacteria	o__Micromonosporales	f__Micromonosporaceae	g__unclassified_f__Micromonosporaceae	s__unclassified_f__Micromonosporaceae	ASV22914	1	8.18148e-7	0.03125
d__Bacteria	k__norank_d__Bacteria	p__Actinobacteriota	c__Actinobacteria	o__Micromonosporales	f__Micromonosporaceae	g__unclassified_f__Micromonosporaceae	s__unclassified_f__Micromonosporaceae	ASV23330	8	6.54519e-6	0.03125
d__Bacteria	k__norank_d__Bacteria	p__Actinobacteriota	c__Actinobacteria	o__Micromonosporales	f__Micromonosporaceae	g__unclassified_f__Micromonosporaceae	s__unclassified_f__Micromonosporaceae	ASV23366	6	4.90889e-6	0.03125
d__Bacteria	k__norank_d__Bacteria	p__Actinobacteriota	c__Actinobacteria	o__Micromonosporales	f__Micromonosporaceae	g__unclassified_f__Micromonosporaceae	s__unclassified_f__Micromonosporaceae	ASV23428	4	3.27259e-6	0.03125
d__Bacteria	k__norank_d__Bacteria	p__Actinobacteriota	c__Actinobacteria	o__Micromonosporales	f__Micromonosporaceae	g__unclassified_f__Micromonosporaceae	s__unclassified_f__Micromonosporaceae	ASV23464	3	2.45445e-6	0.03125
d__Bacteria	k__norank_d__Bacteria	p__Actinobacteriota	c__Actinobacteria	o__Micromonosporales	f__Micromonosporaceae	g__unclassified_f__Micromonosporaceae	s__unclassified_f__Micromonosporaceae	ASV23546	2	1.6363e-6	0.03125
d__Bacteria	k__norank_d__Bacteria	p__Actinobacteriota	c__Actinobacteria	o__Micromonosporales	f__Micromonosporaceae	g__unclassified_f__Micromonosporaceae	s__unclassified_f__Micromonosporaceae	ASV23948	15	1.0E-5	0.03125
d__Bacteria	k__norank_d__Bacteria	p__Actinobacteriota	c__Actinobacteria	o__Micromonosporales	f__Micromonosporaceae	g__unclassified_f__Micromonosporaceae	s__unclassified_f__Micromonosporaceae	ASV2478	17	1.0E-5	0.0625
d__Bacteria	k__norank_d__Bacteria	p__Actinobacteriota	c__Actinobacteria	o__Micromonosporales	f__Micromonosporaceae	g__unclassified_f__Micromonosporaceae	s__unclassified_f__Micromonosporaceae	ASV2489	13	1.0E-5	0.03125
d__Bacteria	k__norank_d__Bacteria	p__Actinobacteriota	c__Actinobacteria	o__Micromonosporales	f__Micromonosporaceae	g__unclassified_f__Micromonosporaceae	s__unclassified_f__Micromonosporaceae	ASV25965	16	1.0E-5	0.03125
d__Bacteria	k__norank_d__Bacteria	p__Actinobacteriota	c__Actinobacteria	o__Micromonosporales	f__Micromonosporaceae	g__unclassified_f__Micromonosporaceae	s__unclassified_f__Micromonosporaceae	ASV26012	5	4.09074e-6	0.03125
d__Bacteria	k__norank_d__Bacteria	p__Actinobacteriota	c__Actinobacteria	o__Micromonosporales	f__Micromonosporaceae	g__unclassified_f__Micromonosporaceae	s__unclassified_f__Micromonosporaceae	ASV26019	7	5.72704e-6	0.03125
d__Bacteria	k__norank_d__Bacteria	p__Actinobacteriota	c__Actinobacteria	o__Micromonosporales	f__Micromonosporaceae	g__unclassified_f__Micromonosporaceae	s__unclassified_f__Micromonosporaceae	ASV26179	3	2.45445e-6	0.03125
d__Bacteria	k__norank_d__Bacteria	p__Actinobacteriota	c__Actinobacteria	o__Micromonosporales	f__Micromonosporaceae	g__unclassified_f__Micromonosporaceae	s__unclassified_f__Micromonosporaceae	ASV26205	2	1.6363e-6	0.03125
d__Bacteria	k__norank_d__Bacteria	p__Actinobacteriota	c__Actinobacteria	o__Micromonosporales	f__Micromonosporaceae	g__unclassified_f__Micromonosporaceae	s__unclassified_f__Micromonosporaceae	ASV26207	4	3.27259e-6	0.03125
d__Bacteria	k__norank_d__Bacteria	p__Actinobacteriota	c__Actinobacteria	o__Micromonosporales	f__Micromonosporaceae	g__unclassified_f__Micromonosporaceae	s__unclassified_f__Micromonosporaceae	ASV26276	2	1.6363e-6	0.03125
d__Bacteria	k__norank_d__Bacteria	p__Actinobacteriota	c__Actinobacteria	o__Micromonosporales	f__Micromonosporaceae	g__unclassified_f__Micromonosporaceae	s__unclassified_f__Micromonosporaceae	ASV26277	2	1.6363e-6	0.03125
d__Bacteria	k__norank_d__Bacteria	p__Actinobacteriota	c__Actinobacteria	o__Micromonosporales	f__Micromonosporaceae	g__unclassified_f__Micromonosporaceae	s__unclassified_f__Micromonosporaceae	ASV26319	1	8.18148e-7	0.03125
d__Bacteria	k__norank_d__Bacteria	p__Actinobacteriota	c__Actinobacteria	o__Micromonosporales	f__Micromonosporaceae	g__unclassified_f__Micromonosporaceae	s__unclassified_f__Micromonosporaceae	ASV26436	25	2.0E-5	0.03125
d__Bacteria	k__norank_d__Bacteria	p__Actinobacteriota	c__Actinobacteria	o__Micromonosporales	f__Micromonosporaceae	g__unclassified_f__Micromonosporaceae	s__unclassified_f__Micromonosporaceae	ASV26453	15	1.0E-5	0.03125
d__Bacteria	k__norank_d__Bacteria	p__Actinobacteriota	c__Actinobacteria	o__Micromonosporales	f__Micromonosporaceae	g__unclassified_f__Micromonosporaceae	s__unclassified_f__Micromonosporaceae	ASV26476	13	1.0E-5	0.03125
d__Bacteria	k__norank_d__Bacteria	p__Actinobacteriota	c__Actinobacteria	o__Micromonosporales	f__Micromonosporaceae	g__unclassified_f__Micromonosporaceae	s__unclassified_f__Micromonosporaceae	ASV26488	12	9.81778e-6	0.03125
d__Bacteria	k__norank_d__Bacteria	p__Actinobacteriota	c__Actinobacteria	o__Micromonosporales	f__Micromonosporaceae	g__unclassified_f__Micromonosporaceae	s__unclassified_f__Micromonosporaceae	ASV26489	12	9.81778e-6	0.03125
d__Bacteria	k__norank_d__Bacteria	p__Actinobacteriota	c__Actinobacteria	o__Micromonosporales	f__Micromonosporaceae	g__unclassified_f__Micromonosporaceae	s__unclassified_f__Micromonosporaceae	ASV26494	10	8.18148e-6	0.03125
d__Bacteria	k__norank_d__Bacteria	p__Actinobacteriota	c__Actinobacteria	o__Micromonosporales	f__Micromonosporaceae	g__unclassified_f__Micromonosporaceae	s__unclassified_f__Micromonosporaceae	ASV26529	9	7.36334e-6	0.03125
d__Bacteria	k__norank_d__Bacteria	p__Actinobacteriota	c__Actinobacteria	o__Micromonosporales	f__Micromonosporaceae	g__unclassified_f__Micromonosporaceae	s__unclassified_f__Micromonosporaceae	ASV26866	2	1.6363e-6	0.03125
d__Bacteria	k__norank_d__Bacteria	p__Actinobacteriota	c__Actinobacteria	o__Micromonosporales	f__Micromonosporaceae	g__unclassified_f__Micromonosporaceae	s__unclassified_f__Micromonosporaceae	ASV26887	2	1.6363e-6	0.03125
d__Bacteria	k__norank_d__Bacteria	p__Actinobacteriota	c__Actinobacteria	o__Micromonosporales	f__Micromonosporaceae	g__unclassified_f__Micromonosporaceae	s__unclassified_f__Micromonosporaceae	ASV27005	2	1.6363e-6	0.03125
d__Bacteria	k__norank_d__Bacteria	p__Actinobacteriota	c__Actinobacteria	o__Micromonosporales	f__Micromonosporaceae	g__unclassified_f__Micromonosporaceae	s__unclassified_f__Micromonosporaceae	ASV27008	3	2.45445e-6	0.03125
d__Bacteria	k__norank_d__Bacteria	p__Actinobacteriota	c__Actinobacteria	o__Micromonosporales	f__Micromonosporaceae	g__unclassified_f__Micromonosporaceae	s__unclassified_f__Micromonosporaceae	ASV27030	2	1.6363e-6	0.03125
d__Bacteria	k__norank_d__Bacteria	p__Actinobacteriota	c__Actinobacteria	o__Micromonosporales	f__Micromonosporaceae	g__unclassified_f__Micromonosporaceae	s__unclassified_f__Micromonosporaceae	ASV27038	2	1.6363e-6	0.03125
d__Bacteria	k__norank_d__Bacteria	p__Actinobacteriota	c__Actinobacteria	o__Micromonosporales	f__Micromonosporaceae	g__unclassified_f__Micromonosporaceae	s__unclassified_f__Micromonosporaceae	ASV28315	7	5.72704e-6	0.03125
d__Bacteria	k__norank_d__Bacteria	p__Actinobacteriota	c__Actinobacteria	o__Micromonosporales	f__Micromonosporaceae	g__unclassified_f__Micromonosporaceae	s__unclassified_f__Micromonosporaceae	ASV29117	14	1.0E-5	0.03125
d__Bacteria	k__norank_d__Bacteria	p__Actinobacteriota	c__Actinobacteria	o__Micromonosporales	f__Micromonosporaceae	g__unclassified_f__Micromonosporaceae	s__unclassified_f__Micromonosporaceae	ASV29277	3	2.45445e-6	0.03125
d__Bacteria	k__norank_d__Bacteria	p__Actinobacteriota	c__Actinobacteria	o__Micromonosporales	f__Micromonosporaceae	g__unclassified_f__Micromonosporaceae	s__unclassified_f__Micromonosporaceae	ASV29421	11	8.99963e-6	0.03125
d__Bacteria	k__norank_d__Bacteria	p__Actinobacteriota	c__Actinobacteria	o__Micromonosporales	f__Micromonosporaceae	g__unclassified_f__Micromonosporaceae	s__unclassified_f__Micromonosporaceae	ASV2950	149	0.00012	0.21875
d__Bacteria	k__norank_d__Bacteria	p__Actinobacteriota	c__Actinobacteria	o__Micromonosporales	f__Micromonosporaceae	g__unclassified_f__Micromonosporaceae	s__unclassified_f__Micromonosporaceae	ASV29560	4	3.27259e-6	0.03125
d__Bacteria	k__norank_d__Bacteria	p__Actinobacteriota	c__Actinobacteria	o__Micromonosporales	f__Micromonosporaceae	g__unclassified_f__Micromonosporaceae	s__unclassified_f__Micromonosporaceae	ASV2962	9	7.36334e-6	0.03125
d__Bacteria	k__norank_d__Bacteria	p__Actinobacteriota	c__Actinobacteria	o__Micromonosporales	f__Micromonosporaceae	g__unclassified_f__Micromonosporaceae	s__unclassified_f__Micromonosporaceae	ASV29638	4	3.27259e-6	0.03125
d__Bacteria	k__norank_d__Bacteria	p__Actinobacteriota	c__Actinobacteria	o__Micromonosporales	f__Micromonosporaceae	g__unclassified_f__Micromonosporaceae	s__unclassified_f__Micromonosporaceae	ASV29689	2	1.6363e-6	0.03125
d__Bacteria	k__norank_d__Bacteria	p__Actinobacteriota	c__Actinobacteria	o__Micromonosporales	f__Micromonosporaceae	g__unclassified_f__Micromonosporaceae	s__unclassified_f__Micromonosporaceae	ASV29694	5	4.09074e-6	0.03125
d__Bacteria	k__norank_d__Bacteria	p__Actinobacteriota	c__Actinobacteria	o__Micromonosporales	f__Micromonosporaceae	g__unclassified_f__Micromonosporaceae	s__unclassified_f__Micromonosporaceae	ASV29718	4	3.27259e-6	0.03125
d__Bacteria	k__norank_d__Bacteria	p__Actinobacteriota	c__Actinobacteria	o__Micromonosporales	f__Micromonosporaceae	g__unclassified_f__Micromonosporaceae	s__unclassified_f__Micromonosporaceae	ASV29731	3	2.45445e-6	0.03125
d__Bacteria	k__norank_d__Bacteria	p__Actinobacteriota	c__Actinobacteria	o__Micromonosporales	f__Micromonosporaceae	g__unclassified_f__Micromonosporaceae	s__unclassified_f__Micromonosporaceae	ASV2976	103	8.0E-5	0.125
d__Bacteria	k__norank_d__Bacteria	p__Actinobacteriota	c__Actinobacteria	o__Micromonosporales	f__Micromonosporaceae	g__unclassified_f__Micromonosporaceae	s__unclassified_f__Micromonosporaceae	ASV29799	1	8.18148e-7	0.03125
d__Bacteria	k__norank_d__Bacteria	p__Actinobacteriota	c__Actinobacteria	o__Micromonosporales	f__Micromonosporaceae	g__unclassified_f__Micromonosporaceae	s__unclassified_f__Micromonosporaceae	ASV29846	2	1.6363e-6	0.03125
d__Bacteria	k__norank_d__Bacteria	p__Actinobacteriota	c__Actinobacteria	o__Micromonosporales	f__Micromonosporaceae	g__unclassified_f__Micromonosporaceae	s__unclassified_f__Micromonosporaceae	ASV29858	2	1.6363e-6	0.03125
d__Bacteria	k__norank_d__Bacteria	p__Actinobacteriota	c__Actinobacteria	o__Micromonosporales	f__Micromonosporaceae	g__unclassified_f__Micromonosporaceae	s__unclassified_f__Micromonosporaceae	ASV30019	1	8.18148e-7	0.03125
d__Bacteria	k__norank_d__Bacteria	p__Actinobacteriota	c__Actinobacteria	o__Micromonosporales	f__Micromonosporaceae	g__unclassified_f__Micromonosporaceae	s__unclassified_f__Micromonosporaceae	ASV30058	2	1.6363e-6	0.03125
d__Bacteria	k__norank_d__Bacteria	p__Actinobacteriota	c__Actinobacteria	o__Micromonosporales	f__Micromonosporaceae	g__unclassified_f__Micromonosporaceae	s__unclassified_f__Micromonosporaceae	ASV3078	164	0.00013	0.25
d__Bacteria	k__norank_d__Bacteria	p__Actinobacteriota	c__Actinobacteria	o__Micromonosporales	f__Micromonosporaceae	g__unclassified_f__Micromonosporaceae	s__unclassified_f__Micromonosporaceae	ASV3128	108	9.0E-5	0.21875
d__Bacteria	k__norank_d__Bacteria	p__Actinobacteriota	c__Actinobacteria	o__Micromonosporales	f__Micromonosporaceae	g__unclassified_f__Micromonosporaceae	s__unclassified_f__Micromonosporaceae	ASV3173	8	6.54519e-6	0.03125
d__Bacteria	k__norank_d__Bacteria	p__Actinobacteriota	c__Actinobacteria	o__Micromonosporales	f__Micromonosporaceae	g__unclassified_f__Micromonosporaceae	s__unclassified_f__Micromonosporaceae	ASV32600	3	2.45445e-6	0.03125
d__Bacteria	k__norank_d__Bacteria	p__Actinobacteriota	c__Actinobacteria	o__Micromonosporales	f__Micromonosporaceae	g__unclassified_f__Micromonosporaceae	s__unclassified_f__Micromonosporaceae	ASV3303	15	1.0E-5	0.03125
d__Bacteria	k__norank_d__Bacteria	p__Actinobacteriota	c__Actinobacteria	o__Micromonosporales	f__Micromonosporaceae	g__unclassified_f__Micromonosporaceae	s__unclassified_f__Micromonosporaceae	ASV365	576	0.00047	0.4375
d__Bacteria	k__norank_d__Bacteria	p__Actinobacteriota	c__Actinobacteria	o__Micromonosporales	f__Micromonosporaceae	g__unclassified_f__Micromonosporaceae	s__unclassified_f__Micromonosporaceae	ASV386	96	8.0E-5	0.1875
d__Bacteria	k__norank_d__Bacteria	p__Actinobacteriota	c__Actinobacteria	o__Micromonosporales	f__Micromonosporaceae	g__unclassified_f__Micromonosporaceae	s__unclassified_f__Micromonosporaceae	ASV401	297	0.00024	0.34375
d__Bacteria	k__norank_d__Bacteria	p__Actinobacteriota	c__Actinobacteria	o__Micromonosporales	f__Micromonosporaceae	g__unclassified_f__Micromonosporaceae	s__unclassified_f__Micromonosporaceae	ASV424	289	0.00024	0.3125
d__Bacteria	k__norank_d__Bacteria	p__Actinobacteriota	c__Actinobacteria	o__Micromonosporales	f__Micromonosporaceae	g__unclassified_f__Micromonosporaceae	s__unclassified_f__Micromonosporaceae	ASV4293	26	2.0E-5	0.03125
d__Bacteria	k__norank_d__Bacteria	p__Actinobacteriota	c__Actinobacteria	o__Micromonosporales	f__Micromonosporaceae	g__unclassified_f__Micromonosporaceae	s__unclassified_f__Micromonosporaceae	ASV43	436	0.00036	0.3125
d__Bacteria	k__norank_d__Bacteria	p__Actinobacteriota	c__Actinobacteria	o__Micromonosporales	f__Micromonosporaceae	g__unclassified_f__Micromonosporaceae	s__unclassified_f__Micromonosporaceae	ASV4349	47	4.0E-5	0.09375
d__Bacteria	k__norank_d__Bacteria	p__Actinobacteriota	c__Actinobacteria	o__Micromonosporales	f__Micromonosporaceae	g__unclassified_f__Micromonosporaceae	s__unclassified_f__Micromonosporaceae	ASV4369	26	2.0E-5	0.0625
d__Bacteria	k__norank_d__Bacteria	p__Actinobacteriota	c__Actinobacteria	o__Micromonosporales	f__Micromonosporaceae	g__unclassified_f__Micromonosporaceae	s__unclassified_f__Micromonosporaceae	ASV4454	13	1.0E-5	0.0625
d__Bacteria	k__norank_d__Bacteria	p__Actinobacteriota	c__Actinobacteria	o__Micromonosporales	f__Micromonosporaceae	g__unclassified_f__Micromonosporaceae	s__unclassified_f__Micromonosporaceae	ASV455	61	5.0E-5	0.15625
d__Bacteria	k__norank_d__Bacteria	p__Actinobacteriota	c__Actinobacteria	o__Micromonosporales	f__Micromonosporaceae	g__unclassified_f__Micromonosporaceae	s__unclassified_f__Micromonosporaceae	ASV4550	33	3.0E-5	0.0625
d__Bacteria	k__norank_d__Bacteria	p__Actinobacteriota	c__Actinobacteria	o__Micromonosporales	f__Micromonosporaceae	g__unclassified_f__Micromonosporaceae	s__unclassified_f__Micromonosporaceae	ASV4590	12	9.81778e-6	0.0625
d__Bacteria	k__norank_d__Bacteria	p__Actinobacteriota	c__Actinobacteria	o__Micromonosporales	f__Micromonosporaceae	g__unclassified_f__Micromonosporaceae	s__unclassified_f__Micromonosporaceae	ASV4703	26	2.0E-5	0.125
d__Bacteria	k__norank_d__Bacteria	p__Actinobacteriota	c__Actinobacteria	o__Micromonosporales	f__Micromonosporaceae	g__unclassified_f__Micromonosporaceae	s__unclassified_f__Micromonosporaceae	ASV4717	5	4.09074e-6	0.03125
d__Bacteria	k__norank_d__Bacteria	p__Actinobacteriota	c__Actinobacteria	o__Micromonosporales	f__Micromonosporaceae	g__unclassified_f__Micromonosporaceae	s__unclassified_f__Micromonosporaceae	ASV4732	4	3.27259e-6	0.03125
d__Bacteria	k__norank_d__Bacteria	p__Actinobacteriota	c__Actinobacteria	o__Micromonosporales	f__Micromonosporaceae	g__unclassified_f__Micromonosporaceae	s__unclassified_f__Micromonosporaceae	ASV4764	4	3.27259e-6	0.03125
d__Bacteria	k__norank_d__Bacteria	p__Actinobacteriota	c__Actinobacteria	o__Micromonosporales	f__Micromonosporaceae	g__unclassified_f__Micromonosporaceae	s__unclassified_f__Micromonosporaceae	ASV542	29	2.0E-5	0.09375
d__Bacteria	k__norank_d__Bacteria	p__Actinobacteriota	c__Actinobacteria	o__Micromonosporales	f__Micromonosporaceae	g__unclassified_f__Micromonosporaceae	s__unclassified_f__Micromonosporaceae	ASV5716	3	2.45445e-6	0.03125
d__Bacteria	k__norank_d__Bacteria	p__Actinobacteriota	c__Actinobacteria	o__Micromonosporales	f__Micromonosporaceae	g__unclassified_f__Micromonosporaceae	s__unclassified_f__Micromonosporaceae	ASV5717	4	3.27259e-6	0.03125
d__Bacteria	k__norank_d__Bacteria	p__Actinobacteriota	c__Actinobacteria	o__Micromonosporales	f__Micromonosporaceae	g__unclassified_f__Micromonosporaceae	s__unclassified_f__Micromonosporaceae	ASV5739	1	8.18148e-7	0.03125
d__Bacteria	k__norank_d__Bacteria	p__Actinobacteriota	c__Actinobacteria	o__Micromonosporales	f__Micromonosporaceae	g__unclassified_f__Micromonosporaceae	s__unclassified_f__Micromonosporaceae	ASV60	1557	0.00127	0.8125
d__Bacteria	k__norank_d__Bacteria	p__Actinobacteriota	c__Actinobacteria	o__Micromonosporales	f__Micromonosporaceae	g__unclassified_f__Micromonosporaceae	s__unclassified_f__Micromonosporaceae	ASV6069	6	4.90889e-6	0.03125
d__Bacteria	k__norank_d__Bacteria	p__Actinobacteriota	c__Actinobacteria	o__Micromonosporales	f__Micromonosporaceae	g__unclassified_f__Micromonosporaceae	s__unclassified_f__Micromonosporaceae	ASV6348	2	1.6363e-6	0.03125
d__Bacteria	k__norank_d__Bacteria	p__Actinobacteriota	c__Actinobacteria	o__Micromonosporales	f__Micromonosporaceae	g__unclassified_f__Micromonosporaceae	s__unclassified_f__Micromonosporaceae	ASV639	35	3.0E-5	0.125
d__Bacteria	k__norank_d__Bacteria	p__Actinobacteriota	c__Actinobacteria	o__Micromonosporales	f__Micromonosporaceae	g__unclassified_f__Micromonosporaceae	s__unclassified_f__Micromonosporaceae	ASV6431	2	1.6363e-6	0.03125
d__Bacteria	k__norank_d__Bacteria	p__Actinobacteriota	c__Actinobacteria	o__Micromonosporales	f__Micromonosporaceae	g__unclassified_f__Micromonosporaceae	s__unclassified_f__Micromonosporaceae	ASV6632	5	4.09074e-6	0.03125
d__Bacteria	k__norank_d__Bacteria	p__Actinobacteriota	c__Actinobacteria	o__Micromonosporales	f__Micromonosporaceae	g__unclassified_f__Micromonosporaceae	s__unclassified_f__Micromonosporaceae	ASV6807	12	9.81778e-6	0.03125
d__Bacteria	k__norank_d__Bacteria	p__Actinobacteriota	c__Actinobacteria	o__Micromonosporales	f__Micromonosporaceae	g__unclassified_f__Micromonosporaceae	s__unclassified_f__Micromonosporaceae	ASV695	3	2.45445e-6	0.03125
d__Bacteria	k__norank_d__Bacteria	p__Actinobacteriota	c__Actinobacteria	o__Micromonosporales	f__Micromonosporaceae	g__unclassified_f__Micromonosporaceae	s__unclassified_f__Micromonosporaceae	ASV7006	2	1.6363e-6	0.03125
d__Bacteria	k__norank_d__Bacteria	p__Actinobacteriota	c__Actinobacteria	o__Micromonosporales	f__Micromonosporaceae	g__unclassified_f__Micromonosporaceae	s__unclassified_f__Micromonosporaceae	ASV7063	19	2.0E-5	0.03125
d__Bacteria	k__norank_d__Bacteria	p__Actinobacteriota	c__Actinobacteria	o__Micromonosporales	f__Micromonosporaceae	g__unclassified_f__Micromonosporaceae	s__unclassified_f__Micromonosporaceae	ASV7098	12	9.81778e-6	0.03125
d__Bacteria	k__norank_d__Bacteria	p__Actinobacteriota	c__Actinobacteria	o__Micromonosporales	f__Micromonosporaceae	g__unclassified_f__Micromonosporaceae	s__unclassified_f__Micromonosporaceae	ASV7208	6	4.90889e-6	0.03125
d__Bacteria	k__norank_d__Bacteria	p__Actinobacteriota	c__Actinobacteria	o__Micromonosporales	f__Micromonosporaceae	g__unclassified_f__Micromonosporaceae	s__unclassified_f__Micromonosporaceae	ASV7302	18	1.0E-5	0.0625
d__Bacteria	k__norank_d__Bacteria	p__Actinobacteriota	c__Actinobacteria	o__Micromonosporales	f__Micromonosporaceae	g__unclassified_f__Micromonosporaceae	s__unclassified_f__Micromonosporaceae	ASV745	21	2.0E-5	0.09375
d__Bacteria	k__norank_d__Bacteria	p__Actinobacteriota	c__Actinobacteria	o__Micromonosporales	f__Micromonosporaceae	g__unclassified_f__Micromonosporaceae	s__unclassified_f__Micromonosporaceae	ASV821	5	4.09074e-6	0.03125
d__Bacteria	k__norank_d__Bacteria	p__Actinobacteriota	c__Actinobacteria	o__Micromonosporales	f__Micromonosporaceae	g__unclassified_f__Micromonosporaceae	s__unclassified_f__Micromonosporaceae	ASV849	6	4.90889e-6	0.03125
d__Bacteria	k__norank_d__Bacteria	p__Actinobacteriota	c__Actinobacteria	o__Micromonosporales	f__Micromonosporaceae	g__unclassified_f__Micromonosporaceae	s__unclassified_f__Micromonosporaceae	ASV8547	131	0.00011	0.125
d__Bacteria	k__norank_d__Bacteria	p__Actinobacteriota	c__Actinobacteria	o__Micromonosporales	f__Micromonosporaceae	g__unclassified_f__Micromonosporaceae	s__unclassified_f__Micromonosporaceae	ASV8568	152	0.00012	0.09375
d__Bacteria	k__norank_d__Bacteria	p__Actinobacteriota	c__Actinobacteria	o__Micromonosporales	f__Micromonosporaceae	g__unclassified_f__Micromonosporaceae	s__unclassified_f__Micromonosporaceae	ASV8621	16	1.0E-5	0.03125
d__Bacteria	k__norank_d__Bacteria	p__Actinobacteriota	c__Actinobacteria	o__Micromonosporales	f__Micromonosporaceae	g__unclassified_f__Micromonosporaceae	s__unclassified_f__Micromonosporaceae	ASV8667	5	4.09074e-6	0.03125
d__Bacteria	k__norank_d__Bacteria	p__Actinobacteriota	c__Actinobacteria	o__Micromonosporales	f__Micromonosporaceae	g__unclassified_f__Micromonosporaceae	s__unclassified_f__Micromonosporaceae	ASV8734	4	3.27259e-6	0.03125
d__Bacteria	k__norank_d__Bacteria	p__Actinobacteriota	c__Actinobacteria	o__Micromonosporales	f__Micromonosporaceae	g__unclassified_f__Micromonosporaceae	s__unclassified_f__Micromonosporaceae	ASV8907	3	2.45445e-6	0.03125
d__Bacteria	k__norank_d__Bacteria	p__Actinobacteriota	c__Actinobacteria	o__Micromonosporales	f__Micromonosporaceae	g__unclassified_f__Micromonosporaceae	s__unclassified_f__Micromonosporaceae	ASV8926	1	8.18148e-7	0.03125
d__Bacteria	k__norank_d__Bacteria	p__Actinobacteriota	c__Actinobacteria	o__Micromonosporales	f__Micromonosporaceae	g__unclassified_f__Micromonosporaceae	s__unclassified_f__Micromonosporaceae	ASV915	2	1.6363e-6	0.03125
d__Bacteria	k__norank_d__Bacteria	p__Actinobacteriota	c__Actinobacteria	o__Micromonosporales	f__Micromonosporaceae	g__unclassified_f__Micromonosporaceae	s__unclassified_f__Micromonosporaceae	ASV988	3	2.45445e-6	0.03125
d__Bacteria	k__norank_d__Bacteria	p__Actinobacteriota	c__Actinobacteria	o__Micromonosporales	f__Micromonosporaceae	g__unclassified_f__Micromonosporaceae	s__unclassified_f__Micromonosporaceae	ASV992	2	1.6363e-6	0.03125
d__Bacteria	k__norank_d__Bacteria	p__Actinobacteriota	c__Actinobacteria	o__Propionibacteriales	f__Nocardioidaceae	g__Actinopolymorpha	s__uncultured_bacterium_g__Actinopolymorpha	ASV1207	66	5.0E-5	0.25
d__Bacteria	k__norank_d__Bacteria	p__Actinobacteriota	c__Actinobacteria	o__Propionibacteriales	f__Nocardioidaceae	g__Actinopolymorpha	s__uncultured_bacterium_g__Actinopolymorpha	ASV21241	12	9.81778e-6	0.03125
d__Bacteria	k__norank_d__Bacteria	p__Actinobacteriota	c__Actinobacteria	o__Propionibacteriales	f__Nocardioidaceae	g__Actinopolymorpha	s__uncultured_bacterium_g__Actinopolymorpha	ASV21793	2	1.6363e-6	0.03125
d__Bacteria	k__norank_d__Bacteria	p__Actinobacteriota	c__Actinobacteria	o__Propionibacteriales	f__Nocardioidaceae	g__Aeromicrobium	s__unclassified_g__Aeromicrobium	ASV26009	7	5.72704e-6	0.03125
d__Bacteria	k__norank_d__Bacteria	p__Actinobacteriota	c__Actinobacteria	o__Propionibacteriales	f__Nocardioidaceae	g__Aeromicrobium	s__unclassified_g__Aeromicrobium	ASV29282	3	2.45445e-6	0.03125
d__Bacteria	k__norank_d__Bacteria	p__Actinobacteriota	c__Actinobacteria	o__Propionibacteriales	f__Nocardioidaceae	g__Aeromicrobium	s__unclassified_g__Aeromicrobium	ASV3010	21	2.0E-5	0.03125
d__Bacteria	k__norank_d__Bacteria	p__Actinobacteriota	c__Actinobacteria	o__Propionibacteriales	f__Nocardioidaceae	g__Aeromicrobium	s__unclassified_g__Aeromicrobium	ASV333	48	4.0E-5	0.125
d__Bacteria	k__norank_d__Bacteria	p__Actinobacteriota	c__Actinobacteria	o__Propionibacteriales	f__Nocardioidaceae	g__Aeromicrobium	s__unclassified_g__Aeromicrobium	ASV395	33	3.0E-5	0.125
d__Bacteria	k__norank_d__Bacteria	p__Actinobacteriota	c__Actinobacteria	o__Propionibacteriales	f__Nocardioidaceae	g__Aeromicrobium	s__unclassified_g__Aeromicrobium	ASV4368	37	3.0E-5	0.0625
d__Bacteria	k__norank_d__Bacteria	p__Actinobacteriota	c__Actinobacteria	o__Propionibacteriales	f__Nocardioidaceae	g__Aeromicrobium	s__unclassified_g__Aeromicrobium	ASV4972	46	4.0E-5	0.09375
d__Bacteria	k__norank_d__Bacteria	p__Actinobacteriota	c__Actinobacteria	o__Propionibacteriales	f__Nocardioidaceae	g__Aeromicrobium	s__unclassified_g__Aeromicrobium	ASV5909	18	1.0E-5	0.03125
d__Bacteria	k__norank_d__Bacteria	p__Actinobacteriota	c__Actinobacteria	o__Propionibacteriales	f__Nocardioidaceae	g__Aeromicrobium	s__unclassified_g__Aeromicrobium	ASV6696	3	2.45445e-6	0.03125
d__Bacteria	k__norank_d__Bacteria	p__Actinobacteriota	c__Actinobacteria	o__Propionibacteriales	f__Nocardioidaceae	g__Aeromicrobium	s__unclassified_g__Aeromicrobium	ASV6878	3	2.45445e-6	0.03125
d__Bacteria	k__norank_d__Bacteria	p__Actinobacteriota	c__Actinobacteria	o__Propionibacteriales	f__Nocardioidaceae	g__Aeromicrobium	s__unclassified_g__Aeromicrobium	ASV962	2	1.6363e-6	0.03125
d__Bacteria	k__norank_d__Bacteria	p__Actinobacteriota	c__Actinobacteria	o__Propionibacteriales	f__Nocardioidaceae	g__Aeromicrobium	s__uncultured_Nocardioidaceae_bacterium_g__Aeromicrobium	ASV29775	2	1.6363e-6	0.03125
d__Bacteria	k__norank_d__Bacteria	p__Actinobacteriota	c__Actinobacteria	o__Propionibacteriales	f__Nocardioidaceae	g__Aeromicrobium	s__uncultured_Nocardioidaceae_bacterium_g__Aeromicrobium	ASV30087	2	1.6363e-6	0.03125
d__Bacteria	k__norank_d__Bacteria	p__Actinobacteriota	c__Actinobacteria	o__Propionibacteriales	f__Nocardioidaceae	g__Aeromicrobium	s__uncultured_Nocardioidaceae_bacterium_g__Aeromicrobium	ASV3057	72	6.0E-5	0.25
d__Bacteria	k__norank_d__Bacteria	p__Actinobacteriota	c__Actinobacteria	o__Propionibacteriales	f__Nocardioidaceae	g__Aeromicrobium	s__uncultured_Nocardioidaceae_bacterium_g__Aeromicrobium	ASV5622	9	7.36334e-6	0.03125
d__Bacteria	k__norank_d__Bacteria	p__Actinobacteriota	c__Actinobacteria	o__Propionibacteriales	f__Nocardioidaceae	g__Aeromicrobium	s__uncultured_Nocardioidaceae_bacterium_g__Aeromicrobium	ASV6612	7	5.72704e-6	0.03125
d__Bacteria	k__norank_d__Bacteria	p__Actinobacteriota	c__Actinobacteria	o__Propionibacteriales	f__Nocardioidaceae	g__Aeromicrobium	s__uncultured_bacterium_g__Aeromicrobium	ASV20737	8	6.54519e-6	0.03125
d__Bacteria	k__norank_d__Bacteria	p__Actinobacteriota	c__Actinobacteria	o__Propionibacteriales	f__Nocardioidaceae	g__Aeromicrobium	s__uncultured_bacterium_g__Aeromicrobium	ASV21177	33	3.0E-5	0.03125
d__Bacteria	k__norank_d__Bacteria	p__Actinobacteriota	c__Actinobacteria	o__Propionibacteriales	f__Nocardioidaceae	g__Aeromicrobium	s__uncultured_bacterium_g__Aeromicrobium	ASV22287	9	7.36334e-6	0.03125
d__Bacteria	k__norank_d__Bacteria	p__Actinobacteriota	c__Actinobacteria	o__Propionibacteriales	f__Nocardioidaceae	g__Aeromicrobium	s__uncultured_bacterium_g__Aeromicrobium	ASV2306	225	0.00018	0.5
d__Bacteria	k__norank_d__Bacteria	p__Actinobacteriota	c__Actinobacteria	o__Propionibacteriales	f__Nocardioidaceae	g__Aeromicrobium	s__uncultured_bacterium_g__Aeromicrobium	ASV25973	13	1.0E-5	0.03125
d__Bacteria	k__norank_d__Bacteria	p__Actinobacteriota	c__Actinobacteria	o__Propionibacteriales	f__Nocardioidaceae	g__Aeromicrobium	s__uncultured_bacterium_g__Aeromicrobium	ASV29522	7	5.72704e-6	0.03125
d__Bacteria	k__norank_d__Bacteria	p__Actinobacteriota	c__Actinobacteria	o__Propionibacteriales	f__Nocardioidaceae	g__Aeromicrobium	s__uncultured_bacterium_g__Aeromicrobium	ASV585	6	4.90889e-6	0.03125
d__Bacteria	k__norank_d__Bacteria	p__Actinobacteriota	c__Actinobacteria	o__Propionibacteriales	f__Nocardioidaceae	g__Flindersiella	s__Flindersiella_endophytica	ASV929	3	2.45445e-6	0.03125
d__Bacteria	k__norank_d__Bacteria	p__Actinobacteriota	c__Actinobacteria	o__Propionibacteriales	f__Nocardioidaceae	g__Flindersiella	s__Flindersiella_endophytica	ASV973	4	3.27259e-6	0.03125
d__Bacteria	k__norank_d__Bacteria	p__Actinobacteriota	c__Actinobacteria	o__Propionibacteriales	f__Nocardioidaceae	g__Flindersiella	s__unclassified_g__Flindersiella	ASV20717	11	8.99963e-6	0.03125
d__Bacteria	k__norank_d__Bacteria	p__Actinobacteriota	c__Actinobacteria	o__Propionibacteriales	f__Nocardioidaceae	g__Flindersiella	s__unclassified_g__Flindersiella	ASV26386	2	1.6363e-6	0.03125
d__Bacteria	k__norank_d__Bacteria	p__Actinobacteriota	c__Actinobacteria	o__Propionibacteriales	f__Nocardioidaceae	g__Flindersiella	s__uncultured_bacterium_g__Flindersiella	ASV1556	5	4.09074e-6	0.03125
d__Bacteria	k__norank_d__Bacteria	p__Actinobacteriota	c__Actinobacteria	o__Propionibacteriales	f__Nocardioidaceae	g__Flindersiella	s__uncultured_bacterium_g__Flindersiella	ASV26052	6	4.90889e-6	0.03125
d__Bacteria	k__norank_d__Bacteria	p__Actinobacteriota	c__Actinobacteria	o__Propionibacteriales	f__Nocardioidaceae	g__Flindersiella	s__uncultured_bacterium_g__Flindersiella	ASV88	364	0.0003	0.375
d__Bacteria	k__norank_d__Bacteria	p__Actinobacteriota	c__Actinobacteria	o__Propionibacteriales	f__Nocardioidaceae	g__Kribbella	s__unclassified_g__Kribbella	ASV102	329	0.00027	0.25
d__Bacteria	k__norank_d__Bacteria	p__Actinobacteriota	c__Actinobacteria	o__Propionibacteriales	f__Nocardioidaceae	g__Kribbella	s__unclassified_g__Kribbella	ASV191	367	0.0003	0.375
d__Bacteria	k__norank_d__Bacteria	p__Actinobacteriota	c__Actinobacteria	o__Propionibacteriales	f__Nocardioidaceae	g__Kribbella	s__unclassified_g__Kribbella	ASV20573	128	0.0001	0.03125
d__Bacteria	k__norank_d__Bacteria	p__Actinobacteriota	c__Actinobacteria	o__Propionibacteriales	f__Nocardioidaceae	g__Kribbella	s__unclassified_g__Kribbella	ASV20686	8	6.54519e-6	0.03125
d__Bacteria	k__norank_d__Bacteria	p__Actinobacteriota	c__Actinobacteria	o__Propionibacteriales	f__Nocardioidaceae	g__Kribbella	s__unclassified_g__Kribbella	ASV20858	5	4.09074e-6	0.03125
d__Bacteria	k__norank_d__Bacteria	p__Actinobacteriota	c__Actinobacteria	o__Propionibacteriales	f__Nocardioidaceae	g__Kribbella	s__unclassified_g__Kribbella	ASV22463	6	4.90889e-6	0.03125
d__Bacteria	k__norank_d__Bacteria	p__Actinobacteriota	c__Actinobacteria	o__Propionibacteriales	f__Nocardioidaceae	g__Kribbella	s__unclassified_g__Kribbella	ASV22606	3	2.45445e-6	0.03125
d__Bacteria	k__norank_d__Bacteria	p__Actinobacteriota	c__Actinobacteria	o__Propionibacteriales	f__Nocardioidaceae	g__Kribbella	s__unclassified_g__Kribbella	ASV22787	2	1.6363e-6	0.03125
d__Bacteria	k__norank_d__Bacteria	p__Actinobacteriota	c__Actinobacteria	o__Propionibacteriales	f__Nocardioidaceae	g__Kribbella	s__unclassified_g__Kribbella	ASV23331	6	4.90889e-6	0.03125
d__Bacteria	k__norank_d__Bacteria	p__Actinobacteriota	c__Actinobacteria	o__Propionibacteriales	f__Nocardioidaceae	g__Kribbella	s__unclassified_g__Kribbella	ASV23624	1	8.18148e-7	0.03125
d__Bacteria	k__norank_d__Bacteria	p__Actinobacteriota	c__Actinobacteria	o__Propionibacteriales	f__Nocardioidaceae	g__Kribbella	s__unclassified_g__Kribbella	ASV26506	12	9.81778e-6	0.03125
d__Bacteria	k__norank_d__Bacteria	p__Actinobacteriota	c__Actinobacteria	o__Propionibacteriales	f__Nocardioidaceae	g__Kribbella	s__unclassified_g__Kribbella	ASV26964	3	2.45445e-6	0.03125
d__Bacteria	k__norank_d__Bacteria	p__Actinobacteriota	c__Actinobacteria	o__Propionibacteriales	f__Nocardioidaceae	g__Kribbella	s__unclassified_g__Kribbella	ASV29290	3	2.45445e-6	0.03125
d__Bacteria	k__norank_d__Bacteria	p__Actinobacteriota	c__Actinobacteria	o__Propionibacteriales	f__Nocardioidaceae	g__Kribbella	s__unclassified_g__Kribbella	ASV2939	28	2.0E-5	0.09375
d__Bacteria	k__norank_d__Bacteria	p__Actinobacteriota	c__Actinobacteria	o__Propionibacteriales	f__Nocardioidaceae	g__Kribbella	s__unclassified_g__Kribbella	ASV29524	6	4.90889e-6	0.03125
d__Bacteria	k__norank_d__Bacteria	p__Actinobacteriota	c__Actinobacteria	o__Propionibacteriales	f__Nocardioidaceae	g__Kribbella	s__unclassified_g__Kribbella	ASV29545	4	3.27259e-6	0.03125
d__Bacteria	k__norank_d__Bacteria	p__Actinobacteriota	c__Actinobacteria	o__Propionibacteriales	f__Nocardioidaceae	g__Kribbella	s__unclassified_g__Kribbella	ASV3049	193	0.00016	0.09375
d__Bacteria	k__norank_d__Bacteria	p__Actinobacteriota	c__Actinobacteria	o__Propionibacteriales	f__Nocardioidaceae	g__Kribbella	s__unclassified_g__Kribbella	ASV32523	6	4.90889e-6	0.03125
d__Bacteria	k__norank_d__Bacteria	p__Actinobacteriota	c__Actinobacteria	o__Propionibacteriales	f__Nocardioidaceae	g__Kribbella	s__unclassified_g__Kribbella	ASV32537	5	4.09074e-6	0.03125
d__Bacteria	k__norank_d__Bacteria	p__Actinobacteriota	c__Actinobacteria	o__Propionibacteriales	f__Nocardioidaceae	g__Kribbella	s__unclassified_g__Kribbella	ASV32563	1	8.18148e-7	0.03125
d__Bacteria	k__norank_d__Bacteria	p__Actinobacteriota	c__Actinobacteria	o__Propionibacteriales	f__Nocardioidaceae	g__Kribbella	s__unclassified_g__Kribbella	ASV32572	3	2.45445e-6	0.03125
d__Bacteria	k__norank_d__Bacteria	p__Actinobacteriota	c__Actinobacteria	o__Propionibacteriales	f__Nocardioidaceae	g__Kribbella	s__unclassified_g__Kribbella	ASV38	2600	0.00213	0.75
d__Bacteria	k__norank_d__Bacteria	p__Actinobacteriota	c__Actinobacteria	o__Propionibacteriales	f__Nocardioidaceae	g__Kribbella	s__unclassified_g__Kribbella	ASV4596	7	5.72704e-6	0.03125
d__Bacteria	k__norank_d__Bacteria	p__Actinobacteriota	c__Actinobacteria	o__Propionibacteriales	f__Nocardioidaceae	g__Kribbella	s__unclassified_g__Kribbella	ASV4640	6	4.90889e-6	0.03125
d__Bacteria	k__norank_d__Bacteria	p__Actinobacteriota	c__Actinobacteria	o__Propionibacteriales	f__Nocardioidaceae	g__Kribbella	s__unclassified_g__Kribbella	ASV493	10	8.18148e-6	0.03125
d__Bacteria	k__norank_d__Bacteria	p__Actinobacteriota	c__Actinobacteria	o__Propionibacteriales	f__Nocardioidaceae	g__Kribbella	s__unclassified_g__Kribbella	ASV5880	26	2.0E-5	0.0625
d__Bacteria	k__norank_d__Bacteria	p__Actinobacteriota	c__Actinobacteria	o__Propionibacteriales	f__Nocardioidaceae	g__Kribbella	s__unclassified_g__Kribbella	ASV6025	7	5.72704e-6	0.03125
d__Bacteria	k__norank_d__Bacteria	p__Actinobacteriota	c__Actinobacteria	o__Propionibacteriales	f__Nocardioidaceae	g__Kribbella	s__unclassified_g__Kribbella	ASV77	597	0.00049	0.46875
d__Bacteria	k__norank_d__Bacteria	p__Actinobacteriota	c__Actinobacteria	o__Propionibacteriales	f__Nocardioidaceae	g__Kribbella	s__unclassified_g__Kribbella	ASV8506	2	1.6363e-6	0.03125
d__Bacteria	k__norank_d__Bacteria	p__Actinobacteriota	c__Actinobacteria	o__Propionibacteriales	f__Nocardioidaceae	g__Kribbella	s__unclassified_g__Kribbella	ASV8773	5	4.09074e-6	0.03125
d__Bacteria	k__norank_d__Bacteria	p__Actinobacteriota	c__Actinobacteria	o__Propionibacteriales	f__Nocardioidaceae	g__Kribbella	s__unclassified_g__Kribbella	ASV8940	2	1.6363e-6	0.03125
d__Bacteria	k__norank_d__Bacteria	p__Actinobacteriota	c__Actinobacteria	o__Propionibacteriales	f__Nocardioidaceae	g__Marmoricola	s__Marmoricola_sp._BAC242	ASV6357	1	8.18148e-7	0.03125
d__Bacteria	k__norank_d__Bacteria	p__Actinobacteriota	c__Actinobacteria	o__Propionibacteriales	f__Nocardioidaceae	g__Marmoricola	s__unclassified_g__Marmoricola	ASV20228	2	1.6363e-6	0.03125
d__Bacteria	k__norank_d__Bacteria	p__Actinobacteriota	c__Actinobacteria	o__Propionibacteriales	f__Nocardioidaceae	g__Marmoricola	s__unclassified_g__Marmoricola	ASV20645	19	2.0E-5	0.03125
d__Bacteria	k__norank_d__Bacteria	p__Actinobacteriota	c__Actinobacteria	o__Propionibacteriales	f__Nocardioidaceae	g__Marmoricola	s__unclassified_g__Marmoricola	ASV21014	1	8.18148e-7	0.03125
d__Bacteria	k__norank_d__Bacteria	p__Actinobacteriota	c__Actinobacteria	o__Propionibacteriales	f__Nocardioidaceae	g__Marmoricola	s__unclassified_g__Marmoricola	ASV2386	13	1.0E-5	0.03125
d__Bacteria	k__norank_d__Bacteria	p__Actinobacteriota	c__Actinobacteria	o__Propionibacteriales	f__Nocardioidaceae	g__Marmoricola	s__unclassified_g__Marmoricola	ASV25774	7	5.72704e-6	0.03125
d__Bacteria	k__norank_d__Bacteria	p__Actinobacteriota	c__Actinobacteria	o__Propionibacteriales	f__Nocardioidaceae	g__Marmoricola	s__unclassified_g__Marmoricola	ASV29410	9	7.36334e-6	0.03125
d__Bacteria	k__norank_d__Bacteria	p__Actinobacteriota	c__Actinobacteria	o__Propionibacteriales	f__Nocardioidaceae	g__Marmoricola	s__unclassified_g__Marmoricola	ASV29530	6	4.90889e-6	0.03125
d__Bacteria	k__norank_d__Bacteria	p__Actinobacteriota	c__Actinobacteria	o__Propionibacteriales	f__Nocardioidaceae	g__Marmoricola	s__unclassified_g__Marmoricola	ASV3036	26	2.0E-5	0.09375
d__Bacteria	k__norank_d__Bacteria	p__Actinobacteriota	c__Actinobacteria	o__Propionibacteriales	f__Nocardioidaceae	g__Marmoricola	s__unclassified_g__Marmoricola	ASV32573	4	3.27259e-6	0.03125
d__Bacteria	k__norank_d__Bacteria	p__Actinobacteriota	c__Actinobacteria	o__Propionibacteriales	f__Nocardioidaceae	g__Marmoricola	s__unclassified_g__Marmoricola	ASV3629	5	4.09074e-6	0.03125
d__Bacteria	k__norank_d__Bacteria	p__Actinobacteriota	c__Actinobacteria	o__Propionibacteriales	f__Nocardioidaceae	g__Marmoricola	s__unclassified_g__Marmoricola	ASV381	13	1.0E-5	0.03125
d__Bacteria	k__norank_d__Bacteria	p__Actinobacteriota	c__Actinobacteria	o__Propionibacteriales	f__Nocardioidaceae	g__Marmoricola	s__unclassified_g__Marmoricola	ASV4499	7	5.72704e-6	0.03125
d__Bacteria	k__norank_d__Bacteria	p__Actinobacteriota	c__Actinobacteria	o__Propionibacteriales	f__Nocardioidaceae	g__Marmoricola	s__unclassified_g__Marmoricola	ASV4987	16	1.0E-5	0.0625
d__Bacteria	k__norank_d__Bacteria	p__Actinobacteriota	c__Actinobacteria	o__Propionibacteriales	f__Nocardioidaceae	g__Marmoricola	s__unclassified_g__Marmoricola	ASV6818	9	7.36334e-6	0.03125
d__Bacteria	k__norank_d__Bacteria	p__Actinobacteriota	c__Actinobacteria	o__Propionibacteriales	f__Nocardioidaceae	g__Marmoricola	s__unclassified_g__Marmoricola	ASV9088	8	6.54519e-6	0.03125
d__Bacteria	k__norank_d__Bacteria	p__Actinobacteriota	c__Actinobacteria	o__Propionibacteriales	f__Nocardioidaceae	g__Mumia	s__unclassified_g__Mumia	ASV29908	2	1.6363e-6	0.03125
d__Bacteria	k__norank_d__Bacteria	p__Actinobacteriota	c__Actinobacteria	o__Propionibacteriales	f__Nocardioidaceae	g__Nocardioides	s__Marmoricola_sp._g__Nocardioides	ASV3316	37	3.0E-5	0.21875
d__Bacteria	k__norank_d__Bacteria	p__Actinobacteriota	c__Actinobacteria	o__Propionibacteriales	f__Nocardioidaceae	g__Nocardioides	s__Nocardioides_fonticola	ASV5948	12	9.81778e-6	0.03125
d__Bacteria	k__norank_d__Bacteria	p__Actinobacteriota	c__Actinobacteria	o__Propionibacteriales	f__Nocardioidaceae	g__Nocardioides	s__Nocardioides_fonticola	ASV5953	9	7.36334e-6	0.03125
d__Bacteria	k__norank_d__Bacteria	p__Actinobacteriota	c__Actinobacteria	o__Propionibacteriales	f__Nocardioidaceae	g__Nocardioides	s__Nocardioides_iriomotensis	ASV1599	32	3.0E-5	0.0625
d__Bacteria	k__norank_d__Bacteria	p__Actinobacteriota	c__Actinobacteria	o__Propionibacteriales	f__Nocardioidaceae	g__Nocardioides	s__Nocardioides_iriomotensis	ASV3159	15	1.0E-5	0.03125
d__Bacteria	k__norank_d__Bacteria	p__Actinobacteriota	c__Actinobacteria	o__Propionibacteriales	f__Nocardioidaceae	g__Nocardioides	s__Nocardioides_iriomotensis	ASV5624	53	4.0E-5	0.125
d__Bacteria	k__norank_d__Bacteria	p__Actinobacteriota	c__Actinobacteria	o__Propionibacteriales	f__Nocardioidaceae	g__Nocardioides	s__Nocardioides_iriomotensis	ASV5874	29	2.0E-5	0.03125
d__Bacteria	k__norank_d__Bacteria	p__Actinobacteriota	c__Actinobacteria	o__Propionibacteriales	f__Nocardioidaceae	g__Nocardioides	s__Nocardioides_iriomotensis	ASV6673	7	5.72704e-6	0.0625
d__Bacteria	k__norank_d__Bacteria	p__Actinobacteriota	c__Actinobacteria	o__Propionibacteriales	f__Nocardioidaceae	g__Nocardioides	s__Nocardioides_iriomotensis	ASV9447	13	1.0E-5	0.0625
d__Bacteria	k__norank_d__Bacteria	p__Actinobacteriota	c__Actinobacteria	o__Propionibacteriales	f__Nocardioidaceae	g__Nocardioides	s__Nocardioides_phosphati	ASV235	301	0.00025	0.4375
d__Bacteria	k__norank_d__Bacteria	p__Actinobacteriota	c__Actinobacteria	o__Propionibacteriales	f__Nocardioidaceae	g__Nocardioides	s__Nocardioides_sp._AK112	ASV552	7	5.72704e-6	0.03125
d__Bacteria	k__norank_d__Bacteria	p__Actinobacteriota	c__Actinobacteria	o__Propionibacteriales	f__Nocardioidaceae	g__Nocardioides	s__Nocardioides_sp._AK112	ASV6144	89	7.0E-5	0.1875
d__Bacteria	k__norank_d__Bacteria	p__Actinobacteriota	c__Actinobacteria	o__Propionibacteriales	f__Nocardioidaceae	g__Nocardioides	s__Nocardioides_sp._SM-2017	ASV22312	8	6.54519e-6	0.03125
d__Bacteria	k__norank_d__Bacteria	p__Actinobacteriota	c__Actinobacteria	o__Propionibacteriales	f__Nocardioidaceae	g__Nocardioides	s__Nocardioides_tritolerans	ASV579	132	0.00011	0.21875
d__Bacteria	k__norank_d__Bacteria	p__Actinobacteriota	c__Actinobacteria	o__Propionibacteriales	f__Nocardioidaceae	g__Nocardioides	s__Nocardioides_tritolerans	ASV5895	17	1.0E-5	0.03125
d__Bacteria	k__norank_d__Bacteria	p__Actinobacteriota	c__Actinobacteria	o__Propionibacteriales	f__Nocardioidaceae	g__Nocardioides	s__unclassified_g__Nocardioides	ASV1066	2	1.6363e-6	0.03125
d__Bacteria	k__norank_d__Bacteria	p__Actinobacteriota	c__Actinobacteria	o__Propionibacteriales	f__Nocardioidaceae	g__Nocardioides	s__unclassified_g__Nocardioides	ASV119	3564	0.00292	0.9375
d__Bacteria	k__norank_d__Bacteria	p__Actinobacteriota	c__Actinobacteria	o__Propionibacteriales	f__Nocardioidaceae	g__Nocardioides	s__unclassified_g__Nocardioides	ASV1264	1	8.18148e-7	0.03125
d__Bacteria	k__norank_d__Bacteria	p__Actinobacteriota	c__Actinobacteria	o__Propionibacteriales	f__Nocardioidaceae	g__Nocardioides	s__unclassified_g__Nocardioides	ASV1328	399	0.00033	0.4375
d__Bacteria	k__norank_d__Bacteria	p__Actinobacteriota	c__Actinobacteria	o__Propionibacteriales	f__Nocardioidaceae	g__Nocardioides	s__unclassified_g__Nocardioides	ASV137	939	0.00077	0.71875
d__Bacteria	k__norank_d__Bacteria	p__Actinobacteriota	c__Actinobacteria	o__Propionibacteriales	f__Nocardioidaceae	g__Nocardioides	s__unclassified_g__Nocardioides	ASV1425	146	0.00012	0.21875
d__Bacteria	k__norank_d__Bacteria	p__Actinobacteriota	c__Actinobacteria	o__Propionibacteriales	f__Nocardioidaceae	g__Nocardioides	s__unclassified_g__Nocardioides	ASV1426	6	4.90889e-6	0.03125
d__Bacteria	k__norank_d__Bacteria	p__Actinobacteriota	c__Actinobacteria	o__Propionibacteriales	f__Nocardioidaceae	g__Nocardioides	s__unclassified_g__Nocardioides	ASV1449	9	7.36334e-6	0.03125
d__Bacteria	k__norank_d__Bacteria	p__Actinobacteriota	c__Actinobacteria	o__Propionibacteriales	f__Nocardioidaceae	g__Nocardioides	s__unclassified_g__Nocardioides	ASV1460	229	0.00019	0.28125
d__Bacteria	k__norank_d__Bacteria	p__Actinobacteriota	c__Actinobacteria	o__Propionibacteriales	f__Nocardioidaceae	g__Nocardioides	s__unclassified_g__Nocardioides	ASV1472	92	8.0E-5	0.25
d__Bacteria	k__norank_d__Bacteria	p__Actinobacteriota	c__Actinobacteria	o__Propionibacteriales	f__Nocardioidaceae	g__Nocardioides	s__unclassified_g__Nocardioides	ASV167	933	0.00076	0.8125
d__Bacteria	k__norank_d__Bacteria	p__Actinobacteriota	c__Actinobacteria	o__Propionibacteriales	f__Nocardioidaceae	g__Nocardioides	s__unclassified_g__Nocardioides	ASV1804	22	2.0E-5	0.03125
d__Bacteria	k__norank_d__Bacteria	p__Actinobacteriota	c__Actinobacteria	o__Propionibacteriales	f__Nocardioidaceae	g__Nocardioides	s__unclassified_g__Nocardioides	ASV20384	3	2.45445e-6	0.03125
d__Bacteria	k__norank_d__Bacteria	p__Actinobacteriota	c__Actinobacteria	o__Propionibacteriales	f__Nocardioidaceae	g__Nocardioides	s__unclassified_g__Nocardioides	ASV20530	2	1.6363e-6	0.03125
d__Bacteria	k__norank_d__Bacteria	p__Actinobacteriota	c__Actinobacteria	o__Propionibacteriales	f__Nocardioidaceae	g__Nocardioides	s__unclassified_g__Nocardioides	ASV20577	53	4.0E-5	0.03125
d__Bacteria	k__norank_d__Bacteria	p__Actinobacteriota	c__Actinobacteria	o__Propionibacteriales	f__Nocardioidaceae	g__Nocardioides	s__unclassified_g__Nocardioides	ASV20653	16	1.0E-5	0.03125
d__Bacteria	k__norank_d__Bacteria	p__Actinobacteriota	c__Actinobacteria	o__Propionibacteriales	f__Nocardioidaceae	g__Nocardioides	s__unclassified_g__Nocardioides	ASV20661	11	8.99963e-6	0.03125
d__Bacteria	k__norank_d__Bacteria	p__Actinobacteriota	c__Actinobacteria	o__Propionibacteriales	f__Nocardioidaceae	g__Nocardioides	s__unclassified_g__Nocardioides	ASV20772	7	5.72704e-6	0.03125
d__Bacteria	k__norank_d__Bacteria	p__Actinobacteriota	c__Actinobacteria	o__Propionibacteriales	f__Nocardioidaceae	g__Nocardioides	s__unclassified_g__Nocardioides	ASV20782	8	6.54519e-6	0.03125
d__Bacteria	k__norank_d__Bacteria	p__Actinobacteriota	c__Actinobacteria	o__Propionibacteriales	f__Nocardioidaceae	g__Nocardioides	s__unclassified_g__Nocardioides	ASV20849	2	1.6363e-6	0.03125
d__Bacteria	k__norank_d__Bacteria	p__Actinobacteriota	c__Actinobacteria	o__Propionibacteriales	f__Nocardioidaceae	g__Nocardioides	s__unclassified_g__Nocardioides	ASV21163	1	8.18148e-7	0.03125
d__Bacteria	k__norank_d__Bacteria	p__Actinobacteriota	c__Actinobacteria	o__Propionibacteriales	f__Nocardioidaceae	g__Nocardioides	s__unclassified_g__Nocardioides	ASV21194	24	2.0E-5	0.03125
d__Bacteria	k__norank_d__Bacteria	p__Actinobacteriota	c__Actinobacteria	o__Propionibacteriales	f__Nocardioidaceae	g__Nocardioides	s__unclassified_g__Nocardioides	ASV21197	23	2.0E-5	0.03125
d__Bacteria	k__norank_d__Bacteria	p__Actinobacteriota	c__Actinobacteria	o__Propionibacteriales	f__Nocardioidaceae	g__Nocardioides	s__unclassified_g__Nocardioides	ASV21217	17	1.0E-5	0.03125
d__Bacteria	k__norank_d__Bacteria	p__Actinobacteriota	c__Actinobacteria	o__Propionibacteriales	f__Nocardioidaceae	g__Nocardioides	s__unclassified_g__Nocardioides	ASV21226	18	1.0E-5	0.03125
d__Bacteria	k__norank_d__Bacteria	p__Actinobacteriota	c__Actinobacteria	o__Propionibacteriales	f__Nocardioidaceae	g__Nocardioides	s__unclassified_g__Nocardioides	ASV21267	13	1.0E-5	0.03125
d__Bacteria	k__norank_d__Bacteria	p__Actinobacteriota	c__Actinobacteria	o__Propionibacteriales	f__Nocardioidaceae	g__Nocardioides	s__unclassified_g__Nocardioides	ASV21366	7	5.72704e-6	0.03125
d__Bacteria	k__norank_d__Bacteria	p__Actinobacteriota	c__Actinobacteria	o__Propionibacteriales	f__Nocardioidaceae	g__Nocardioides	s__unclassified_g__Nocardioides	ASV21502	4	3.27259e-6	0.03125
d__Bacteria	k__norank_d__Bacteria	p__Actinobacteriota	c__Actinobacteria	o__Propionibacteriales	f__Nocardioidaceae	g__Nocardioides	s__unclassified_g__Nocardioides	ASV21593	3	2.45445e-6	0.03125
d__Bacteria	k__norank_d__Bacteria	p__Actinobacteriota	c__Actinobacteria	o__Propionibacteriales	f__Nocardioidaceae	g__Nocardioides	s__unclassified_g__Nocardioides	ASV21727	2	1.6363e-6	0.03125
d__Bacteria	k__norank_d__Bacteria	p__Actinobacteriota	c__Actinobacteria	o__Propionibacteriales	f__Nocardioidaceae	g__Nocardioides	s__unclassified_g__Nocardioides	ASV21784	2	1.6363e-6	0.03125
d__Bacteria	k__norank_d__Bacteria	p__Actinobacteriota	c__Actinobacteria	o__Propionibacteriales	f__Nocardioidaceae	g__Nocardioides	s__unclassified_g__Nocardioides	ASV22258	9	7.36334e-6	0.03125
d__Bacteria	k__norank_d__Bacteria	p__Actinobacteriota	c__Actinobacteria	o__Propionibacteriales	f__Nocardioidaceae	g__Nocardioides	s__unclassified_g__Nocardioides	ASV22288	11	8.99963e-6	0.03125
d__Bacteria	k__norank_d__Bacteria	p__Actinobacteriota	c__Actinobacteria	o__Propionibacteriales	f__Nocardioidaceae	g__Nocardioides	s__unclassified_g__Nocardioides	ASV22324	8	6.54519e-6	0.03125
d__Bacteria	k__norank_d__Bacteria	p__Actinobacteriota	c__Actinobacteria	o__Propionibacteriales	f__Nocardioidaceae	g__Nocardioides	s__unclassified_g__Nocardioides	ASV22381	6	4.90889e-6	0.03125
d__Bacteria	k__norank_d__Bacteria	p__Actinobacteriota	c__Actinobacteria	o__Propionibacteriales	f__Nocardioidaceae	g__Nocardioides	s__unclassified_g__Nocardioides	ASV22405	18	1.0E-5	0.0625
d__Bacteria	k__norank_d__Bacteria	p__Actinobacteriota	c__Actinobacteria	o__Propionibacteriales	f__Nocardioidaceae	g__Nocardioides	s__unclassified_g__Nocardioides	ASV22721	2	1.6363e-6	0.03125
d__Bacteria	k__norank_d__Bacteria	p__Actinobacteriota	c__Actinobacteria	o__Propionibacteriales	f__Nocardioidaceae	g__Nocardioides	s__unclassified_g__Nocardioides	ASV22798	3	2.45445e-6	0.03125
d__Bacteria	k__norank_d__Bacteria	p__Actinobacteriota	c__Actinobacteria	o__Propionibacteriales	f__Nocardioidaceae	g__Nocardioides	s__unclassified_g__Nocardioides	ASV22872	1	8.18148e-7	0.03125
d__Bacteria	k__norank_d__Bacteria	p__Actinobacteriota	c__Actinobacteria	o__Propionibacteriales	f__Nocardioidaceae	g__Nocardioides	s__unclassified_g__Nocardioides	ASV22876	1	8.18148e-7	0.03125
d__Bacteria	k__norank_d__Bacteria	p__Actinobacteriota	c__Actinobacteria	o__Propionibacteriales	f__Nocardioidaceae	g__Nocardioides	s__unclassified_g__Nocardioides	ASV22925	2	1.6363e-6	0.03125
d__Bacteria	k__norank_d__Bacteria	p__Actinobacteriota	c__Actinobacteria	o__Propionibacteriales	f__Nocardioidaceae	g__Nocardioides	s__unclassified_g__Nocardioides	ASV2325	16	1.0E-5	0.0625
d__Bacteria	k__norank_d__Bacteria	p__Actinobacteriota	c__Actinobacteria	o__Propionibacteriales	f__Nocardioidaceae	g__Nocardioides	s__unclassified_g__Nocardioides	ASV23296	11	8.99963e-6	0.03125
d__Bacteria	k__norank_d__Bacteria	p__Actinobacteriota	c__Actinobacteria	o__Propionibacteriales	f__Nocardioidaceae	g__Nocardioides	s__unclassified_g__Nocardioides	ASV23334	7	5.72704e-6	0.03125
d__Bacteria	k__norank_d__Bacteria	p__Actinobacteriota	c__Actinobacteria	o__Propionibacteriales	f__Nocardioidaceae	g__Nocardioides	s__unclassified_g__Nocardioides	ASV23380	6	4.90889e-6	0.03125
d__Bacteria	k__norank_d__Bacteria	p__Actinobacteriota	c__Actinobacteria	o__Propionibacteriales	f__Nocardioidaceae	g__Nocardioides	s__unclassified_g__Nocardioides	ASV2345	124	0.0001	0.125
d__Bacteria	k__norank_d__Bacteria	p__Actinobacteriota	c__Actinobacteria	o__Propionibacteriales	f__Nocardioidaceae	g__Nocardioides	s__unclassified_g__Nocardioides	ASV2359	27	2.0E-5	0.03125
d__Bacteria	k__norank_d__Bacteria	p__Actinobacteriota	c__Actinobacteria	o__Propionibacteriales	f__Nocardioidaceae	g__Nocardioides	s__unclassified_g__Nocardioides	ASV2363	59	5.0E-5	0.09375
d__Bacteria	k__norank_d__Bacteria	p__Actinobacteriota	c__Actinobacteria	o__Propionibacteriales	f__Nocardioidaceae	g__Nocardioides	s__unclassified_g__Nocardioides	ASV2399	140	0.00011	0.28125
d__Bacteria	k__norank_d__Bacteria	p__Actinobacteriota	c__Actinobacteria	o__Propionibacteriales	f__Nocardioidaceae	g__Nocardioides	s__unclassified_g__Nocardioides	ASV24061	3	2.45445e-6	0.03125
d__Bacteria	k__norank_d__Bacteria	p__Actinobacteriota	c__Actinobacteria	o__Propionibacteriales	f__Nocardioidaceae	g__Nocardioides	s__unclassified_g__Nocardioides	ASV2416	80	7.0E-5	0.125
d__Bacteria	k__norank_d__Bacteria	p__Actinobacteriota	c__Actinobacteria	o__Propionibacteriales	f__Nocardioidaceae	g__Nocardioides	s__unclassified_g__Nocardioides	ASV2456	135	0.00011	0.4375
d__Bacteria	k__norank_d__Bacteria	p__Actinobacteriota	c__Actinobacteria	o__Propionibacteriales	f__Nocardioidaceae	g__Nocardioides	s__unclassified_g__Nocardioides	ASV25864	4	3.27259e-6	0.03125
d__Bacteria	k__norank_d__Bacteria	p__Actinobacteriota	c__Actinobacteria	o__Propionibacteriales	f__Nocardioidaceae	g__Nocardioides	s__unclassified_g__Nocardioides	ASV25948	1	8.18148e-7	0.03125
d__Bacteria	k__norank_d__Bacteria	p__Actinobacteriota	c__Actinobacteria	o__Propionibacteriales	f__Nocardioidaceae	g__Nocardioides	s__unclassified_g__Nocardioides	ASV26035	5	4.09074e-6	0.03125
d__Bacteria	k__norank_d__Bacteria	p__Actinobacteriota	c__Actinobacteria	o__Propionibacteriales	f__Nocardioidaceae	g__Nocardioides	s__unclassified_g__Nocardioides	ASV26065	5	4.09074e-6	0.03125
d__Bacteria	k__norank_d__Bacteria	p__Actinobacteriota	c__Actinobacteria	o__Propionibacteriales	f__Nocardioidaceae	g__Nocardioides	s__unclassified_g__Nocardioides	ASV26088	6	4.90889e-6	0.03125
d__Bacteria	k__norank_d__Bacteria	p__Actinobacteriota	c__Actinobacteria	o__Propionibacteriales	f__Nocardioidaceae	g__Nocardioides	s__unclassified_g__Nocardioides	ASV26396	2	1.6363e-6	0.03125
d__Bacteria	k__norank_d__Bacteria	p__Actinobacteriota	c__Actinobacteria	o__Propionibacteriales	f__Nocardioidaceae	g__Nocardioides	s__unclassified_g__Nocardioides	ASV26417	1	8.18148e-7	0.03125
d__Bacteria	k__norank_d__Bacteria	p__Actinobacteriota	c__Actinobacteria	o__Propionibacteriales	f__Nocardioidaceae	g__Nocardioides	s__unclassified_g__Nocardioides	ASV26471	9	7.36334e-6	0.03125
d__Bacteria	k__norank_d__Bacteria	p__Actinobacteriota	c__Actinobacteria	o__Propionibacteriales	f__Nocardioidaceae	g__Nocardioides	s__unclassified_g__Nocardioides	ASV26493	12	9.81778e-6	0.03125
d__Bacteria	k__norank_d__Bacteria	p__Actinobacteriota	c__Actinobacteria	o__Propionibacteriales	f__Nocardioidaceae	g__Nocardioides	s__unclassified_g__Nocardioides	ASV26541	8	6.54519e-6	0.03125
d__Bacteria	k__norank_d__Bacteria	p__Actinobacteriota	c__Actinobacteria	o__Propionibacteriales	f__Nocardioidaceae	g__Nocardioides	s__unclassified_g__Nocardioides	ASV26596	7	5.72704e-6	0.03125
d__Bacteria	k__norank_d__Bacteria	p__Actinobacteriota	c__Actinobacteria	o__Propionibacteriales	f__Nocardioidaceae	g__Nocardioides	s__unclassified_g__Nocardioides	ASV26598	7	5.72704e-6	0.03125
d__Bacteria	k__norank_d__Bacteria	p__Actinobacteriota	c__Actinobacteria	o__Propionibacteriales	f__Nocardioidaceae	g__Nocardioides	s__unclassified_g__Nocardioides	ASV26609	6	4.90889e-6	0.03125
d__Bacteria	k__norank_d__Bacteria	p__Actinobacteriota	c__Actinobacteria	o__Propionibacteriales	f__Nocardioidaceae	g__Nocardioides	s__unclassified_g__Nocardioides	ASV26625	7	5.72704e-6	0.03125
d__Bacteria	k__norank_d__Bacteria	p__Actinobacteriota	c__Actinobacteria	o__Propionibacteriales	f__Nocardioidaceae	g__Nocardioides	s__unclassified_g__Nocardioides	ASV26654	7	5.72704e-6	0.03125
d__Bacteria	k__norank_d__Bacteria	p__Actinobacteriota	c__Actinobacteria	o__Propionibacteriales	f__Nocardioidaceae	g__Nocardioides	s__unclassified_g__Nocardioides	ASV26683	3	2.45445e-6	0.03125
d__Bacteria	k__norank_d__Bacteria	p__Actinobacteriota	c__Actinobacteria	o__Propionibacteriales	f__Nocardioidaceae	g__Nocardioides	s__unclassified_g__Nocardioides	ASV26688	3	2.45445e-6	0.03125
d__Bacteria	k__norank_d__Bacteria	p__Actinobacteriota	c__Actinobacteria	o__Propionibacteriales	f__Nocardioidaceae	g__Nocardioides	s__unclassified_g__Nocardioides	ASV26720	5	4.09074e-6	0.03125
d__Bacteria	k__norank_d__Bacteria	p__Actinobacteriota	c__Actinobacteria	o__Propionibacteriales	f__Nocardioidaceae	g__Nocardioides	s__unclassified_g__Nocardioides	ASV26725	4	3.27259e-6	0.03125
d__Bacteria	k__norank_d__Bacteria	p__Actinobacteriota	c__Actinobacteria	o__Propionibacteriales	f__Nocardioidaceae	g__Nocardioides	s__unclassified_g__Nocardioides	ASV26729	4	3.27259e-6	0.03125
d__Bacteria	k__norank_d__Bacteria	p__Actinobacteriota	c__Actinobacteria	o__Propionibacteriales	f__Nocardioidaceae	g__Nocardioides	s__unclassified_g__Nocardioides	ASV26732	3	2.45445e-6	0.03125
d__Bacteria	k__norank_d__Bacteria	p__Actinobacteriota	c__Actinobacteria	o__Propionibacteriales	f__Nocardioidaceae	g__Nocardioides	s__unclassified_g__Nocardioides	ASV26819	2	1.6363e-6	0.03125
d__Bacteria	k__norank_d__Bacteria	p__Actinobacteriota	c__Actinobacteria	o__Propionibacteriales	f__Nocardioidaceae	g__Nocardioides	s__unclassified_g__Nocardioides	ASV26860	3	2.45445e-6	0.03125
d__Bacteria	k__norank_d__Bacteria	p__Actinobacteriota	c__Actinobacteria	o__Propionibacteriales	f__Nocardioidaceae	g__Nocardioides	s__unclassified_g__Nocardioides	ASV26955	2	1.6363e-6	0.03125
d__Bacteria	k__norank_d__Bacteria	p__Actinobacteriota	c__Actinobacteria	o__Propionibacteriales	f__Nocardioidaceae	g__Nocardioides	s__unclassified_g__Nocardioides	ASV282	22	2.0E-5	0.03125
d__Bacteria	k__norank_d__Bacteria	p__Actinobacteriota	c__Actinobacteria	o__Propionibacteriales	f__Nocardioidaceae	g__Nocardioides	s__unclassified_g__Nocardioides	ASV28386	3	2.45445e-6	0.03125
d__Bacteria	k__norank_d__Bacteria	p__Actinobacteriota	c__Actinobacteria	o__Propionibacteriales	f__Nocardioidaceae	g__Nocardioides	s__unclassified_g__Nocardioides	ASV28398	1	8.18148e-7	0.03125
d__Bacteria	k__norank_d__Bacteria	p__Actinobacteriota	c__Actinobacteria	o__Propionibacteriales	f__Nocardioidaceae	g__Nocardioides	s__unclassified_g__Nocardioides	ASV28406	3	2.45445e-6	0.03125
d__Bacteria	k__norank_d__Bacteria	p__Actinobacteriota	c__Actinobacteria	o__Propionibacteriales	f__Nocardioidaceae	g__Nocardioides	s__unclassified_g__Nocardioides	ASV28443	2	1.6363e-6	0.03125
d__Bacteria	k__norank_d__Bacteria	p__Actinobacteriota	c__Actinobacteria	o__Propionibacteriales	f__Nocardioidaceae	g__Nocardioides	s__unclassified_g__Nocardioides	ASV29134	10	8.18148e-6	0.03125
d__Bacteria	k__norank_d__Bacteria	p__Actinobacteriota	c__Actinobacteria	o__Propionibacteriales	f__Nocardioidaceae	g__Nocardioides	s__unclassified_g__Nocardioides	ASV29159	6	4.90889e-6	0.03125
d__Bacteria	k__norank_d__Bacteria	p__Actinobacteriota	c__Actinobacteria	o__Propionibacteriales	f__Nocardioidaceae	g__Nocardioides	s__unclassified_g__Nocardioides	ASV29168	5	4.09074e-6	0.03125
d__Bacteria	k__norank_d__Bacteria	p__Actinobacteriota	c__Actinobacteria	o__Propionibacteriales	f__Nocardioidaceae	g__Nocardioides	s__unclassified_g__Nocardioides	ASV29188	4	3.27259e-6	0.03125
d__Bacteria	k__norank_d__Bacteria	p__Actinobacteriota	c__Actinobacteria	o__Propionibacteriales	f__Nocardioidaceae	g__Nocardioides	s__unclassified_g__Nocardioides	ASV29230	4	3.27259e-6	0.03125
d__Bacteria	k__norank_d__Bacteria	p__Actinobacteriota	c__Actinobacteria	o__Propionibacteriales	f__Nocardioidaceae	g__Nocardioides	s__unclassified_g__Nocardioides	ASV29300	3	2.45445e-6	0.03125
d__Bacteria	k__norank_d__Bacteria	p__Actinobacteriota	c__Actinobacteria	o__Propionibacteriales	f__Nocardioidaceae	g__Nocardioides	s__unclassified_g__Nocardioides	ASV29308	3	2.45445e-6	0.03125
d__Bacteria	k__norank_d__Bacteria	p__Actinobacteriota	c__Actinobacteria	o__Propionibacteriales	f__Nocardioidaceae	g__Nocardioides	s__unclassified_g__Nocardioides	ASV29408	15	1.0E-5	0.03125
d__Bacteria	k__norank_d__Bacteria	p__Actinobacteriota	c__Actinobacteria	o__Propionibacteriales	f__Nocardioidaceae	g__Nocardioides	s__unclassified_g__Nocardioides	ASV2951	19	2.0E-5	0.0625
d__Bacteria	k__norank_d__Bacteria	p__Actinobacteriota	c__Actinobacteria	o__Propionibacteriales	f__Nocardioidaceae	g__Nocardioides	s__unclassified_g__Nocardioides	ASV29581	6	4.90889e-6	0.03125
d__Bacteria	k__norank_d__Bacteria	p__Actinobacteriota	c__Actinobacteria	o__Propionibacteriales	f__Nocardioidaceae	g__Nocardioides	s__unclassified_g__Nocardioides	ASV29603	4	3.27259e-6	0.03125
d__Bacteria	k__norank_d__Bacteria	p__Actinobacteriota	c__Actinobacteria	o__Propionibacteriales	f__Nocardioidaceae	g__Nocardioides	s__unclassified_g__Nocardioides	ASV29672	2	1.6363e-6	0.03125
d__Bacteria	k__norank_d__Bacteria	p__Actinobacteriota	c__Actinobacteria	o__Propionibacteriales	f__Nocardioidaceae	g__Nocardioides	s__unclassified_g__Nocardioides	ASV29743	2	1.6363e-6	0.03125
d__Bacteria	k__norank_d__Bacteria	p__Actinobacteriota	c__Actinobacteria	o__Propionibacteriales	f__Nocardioidaceae	g__Nocardioides	s__unclassified_g__Nocardioides	ASV29748	2	1.6363e-6	0.03125
d__Bacteria	k__norank_d__Bacteria	p__Actinobacteriota	c__Actinobacteria	o__Propionibacteriales	f__Nocardioidaceae	g__Nocardioides	s__unclassified_g__Nocardioides	ASV29756	2	1.6363e-6	0.03125
d__Bacteria	k__norank_d__Bacteria	p__Actinobacteriota	c__Actinobacteria	o__Propionibacteriales	f__Nocardioidaceae	g__Nocardioides	s__unclassified_g__Nocardioides	ASV29796	3	2.45445e-6	0.03125
d__Bacteria	k__norank_d__Bacteria	p__Actinobacteriota	c__Actinobacteria	o__Propionibacteriales	f__Nocardioidaceae	g__Nocardioides	s__unclassified_g__Nocardioides	ASV29894	3	2.45445e-6	0.03125
d__Bacteria	k__norank_d__Bacteria	p__Actinobacteriota	c__Actinobacteria	o__Propionibacteriales	f__Nocardioidaceae	g__Nocardioides	s__unclassified_g__Nocardioides	ASV2995	26	2.0E-5	0.09375
d__Bacteria	k__norank_d__Bacteria	p__Actinobacteriota	c__Actinobacteria	o__Propionibacteriales	f__Nocardioidaceae	g__Nocardioides	s__unclassified_g__Nocardioides	ASV29990	2	1.6363e-6	0.03125
d__Bacteria	k__norank_d__Bacteria	p__Actinobacteriota	c__Actinobacteria	o__Propionibacteriales	f__Nocardioidaceae	g__Nocardioides	s__unclassified_g__Nocardioides	ASV3097	14	1.0E-5	0.03125
d__Bacteria	k__norank_d__Bacteria	p__Actinobacteriota	c__Actinobacteria	o__Propionibacteriales	f__Nocardioidaceae	g__Nocardioides	s__unclassified_g__Nocardioides	ASV3176	11	8.99963e-6	0.03125
d__Bacteria	k__norank_d__Bacteria	p__Actinobacteriota	c__Actinobacteria	o__Propionibacteriales	f__Nocardioidaceae	g__Nocardioides	s__unclassified_g__Nocardioides	ASV3234	15	1.0E-5	0.0625
d__Bacteria	k__norank_d__Bacteria	p__Actinobacteriota	c__Actinobacteria	o__Propionibacteriales	f__Nocardioidaceae	g__Nocardioides	s__unclassified_g__Nocardioides	ASV32509	6	4.90889e-6	0.03125
d__Bacteria	k__norank_d__Bacteria	p__Actinobacteriota	c__Actinobacteria	o__Propionibacteriales	f__Nocardioidaceae	g__Nocardioides	s__unclassified_g__Nocardioides	ASV32614	3	2.45445e-6	0.03125
d__Bacteria	k__norank_d__Bacteria	p__Actinobacteriota	c__Actinobacteria	o__Propionibacteriales	f__Nocardioidaceae	g__Nocardioides	s__unclassified_g__Nocardioides	ASV3403	61	5.0E-5	0.1875
d__Bacteria	k__norank_d__Bacteria	p__Actinobacteriota	c__Actinobacteria	o__Propionibacteriales	f__Nocardioidaceae	g__Nocardioides	s__unclassified_g__Nocardioides	ASV3419	42	3.0E-5	0.09375
d__Bacteria	k__norank_d__Bacteria	p__Actinobacteriota	c__Actinobacteria	o__Propionibacteriales	f__Nocardioidaceae	g__Nocardioides	s__unclassified_g__Nocardioides	ASV3503	29	2.0E-5	0.09375
d__Bacteria	k__norank_d__Bacteria	p__Actinobacteriota	c__Actinobacteria	o__Propionibacteriales	f__Nocardioidaceae	g__Nocardioides	s__unclassified_g__Nocardioides	ASV369	203	0.00017	0.28125
d__Bacteria	k__norank_d__Bacteria	p__Actinobacteriota	c__Actinobacteria	o__Propionibacteriales	f__Nocardioidaceae	g__Nocardioides	s__unclassified_g__Nocardioides	ASV405	191	0.00016	0.34375
d__Bacteria	k__norank_d__Bacteria	p__Actinobacteriota	c__Actinobacteria	o__Propionibacteriales	f__Nocardioidaceae	g__Nocardioides	s__unclassified_g__Nocardioides	ASV4274	334	0.00027	0.25
d__Bacteria	k__norank_d__Bacteria	p__Actinobacteriota	c__Actinobacteria	o__Propionibacteriales	f__Nocardioidaceae	g__Nocardioides	s__unclassified_g__Nocardioides	ASV4295	207	0.00017	0.34375
d__Bacteria	k__norank_d__Bacteria	p__Actinobacteriota	c__Actinobacteria	o__Propionibacteriales	f__Nocardioidaceae	g__Nocardioides	s__unclassified_g__Nocardioides	ASV4309	20	2.0E-5	0.03125
d__Bacteria	k__norank_d__Bacteria	p__Actinobacteriota	c__Actinobacteria	o__Propionibacteriales	f__Nocardioidaceae	g__Nocardioides	s__unclassified_g__Nocardioides	ASV4316	46	4.0E-5	0.0625
d__Bacteria	k__norank_d__Bacteria	p__Actinobacteriota	c__Actinobacteria	o__Propionibacteriales	f__Nocardioidaceae	g__Nocardioides	s__unclassified_g__Nocardioides	ASV4344	16	1.0E-5	0.03125
d__Bacteria	k__norank_d__Bacteria	p__Actinobacteriota	c__Actinobacteria	o__Propionibacteriales	f__Nocardioidaceae	g__Nocardioides	s__unclassified_g__Nocardioides	ASV4400	11	8.99963e-6	0.03125
d__Bacteria	k__norank_d__Bacteria	p__Actinobacteriota	c__Actinobacteria	o__Propionibacteriales	f__Nocardioidaceae	g__Nocardioides	s__unclassified_g__Nocardioides	ASV4453	8	6.54519e-6	0.03125
d__Bacteria	k__norank_d__Bacteria	p__Actinobacteriota	c__Actinobacteria	o__Propionibacteriales	f__Nocardioidaceae	g__Nocardioides	s__unclassified_g__Nocardioides	ASV451	251	0.00021	0.25
d__Bacteria	k__norank_d__Bacteria	p__Actinobacteriota	c__Actinobacteria	o__Propionibacteriales	f__Nocardioidaceae	g__Nocardioides	s__unclassified_g__Nocardioides	ASV4567	6	4.90889e-6	0.03125
d__Bacteria	k__norank_d__Bacteria	p__Actinobacteriota	c__Actinobacteria	o__Propionibacteriales	f__Nocardioidaceae	g__Nocardioides	s__unclassified_g__Nocardioides	ASV4641	5	4.09074e-6	0.03125
d__Bacteria	k__norank_d__Bacteria	p__Actinobacteriota	c__Actinobacteria	o__Propionibacteriales	f__Nocardioidaceae	g__Nocardioides	s__unclassified_g__Nocardioides	ASV4668	9	7.36334e-6	0.0625
d__Bacteria	k__norank_d__Bacteria	p__Actinobacteriota	c__Actinobacteria	o__Propionibacteriales	f__Nocardioidaceae	g__Nocardioides	s__unclassified_g__Nocardioides	ASV4672	2	1.6363e-6	0.03125
d__Bacteria	k__norank_d__Bacteria	p__Actinobacteriota	c__Actinobacteria	o__Propionibacteriales	f__Nocardioidaceae	g__Nocardioides	s__unclassified_g__Nocardioides	ASV471	85	7.0E-5	0.15625
d__Bacteria	k__norank_d__Bacteria	p__Actinobacteriota	c__Actinobacteria	o__Propionibacteriales	f__Nocardioidaceae	g__Nocardioides	s__unclassified_g__Nocardioides	ASV4718	4	3.27259e-6	0.03125
d__Bacteria	k__norank_d__Bacteria	p__Actinobacteriota	c__Actinobacteria	o__Propionibacteriales	f__Nocardioidaceae	g__Nocardioides	s__unclassified_g__Nocardioides	ASV4904	2	1.6363e-6	0.03125
d__Bacteria	k__norank_d__Bacteria	p__Actinobacteriota	c__Actinobacteria	o__Propionibacteriales	f__Nocardioidaceae	g__Nocardioides	s__unclassified_g__Nocardioides	ASV5074	14	1.0E-5	0.0625
d__Bacteria	k__norank_d__Bacteria	p__Actinobacteriota	c__Actinobacteria	o__Propionibacteriales	f__Nocardioidaceae	g__Nocardioides	s__unclassified_g__Nocardioides	ASV522	81	7.0E-5	0.21875
d__Bacteria	k__norank_d__Bacteria	p__Actinobacteriota	c__Actinobacteria	o__Propionibacteriales	f__Nocardioidaceae	g__Nocardioides	s__unclassified_g__Nocardioides	ASV56	429	0.00035	0.5625
d__Bacteria	k__norank_d__Bacteria	p__Actinobacteriota	c__Actinobacteria	o__Propionibacteriales	f__Nocardioidaceae	g__Nocardioides	s__unclassified_g__Nocardioides	ASV5690	4	3.27259e-6	0.03125
d__Bacteria	k__norank_d__Bacteria	p__Actinobacteriota	c__Actinobacteria	o__Propionibacteriales	f__Nocardioidaceae	g__Nocardioides	s__unclassified_g__Nocardioides	ASV577	87	7.0E-5	0.3125
d__Bacteria	k__norank_d__Bacteria	p__Actinobacteriota	c__Actinobacteria	o__Propionibacteriales	f__Nocardioidaceae	g__Nocardioides	s__unclassified_g__Nocardioides	ASV5831	2	1.6363e-6	0.03125
d__Bacteria	k__norank_d__Bacteria	p__Actinobacteriota	c__Actinobacteria	o__Propionibacteriales	f__Nocardioidaceae	g__Nocardioides	s__unclassified_g__Nocardioides	ASV6097	6	4.90889e-6	0.03125
d__Bacteria	k__norank_d__Bacteria	p__Actinobacteriota	c__Actinobacteria	o__Propionibacteriales	f__Nocardioidaceae	g__Nocardioides	s__unclassified_g__Nocardioides	ASV6110	6	4.90889e-6	0.03125
d__Bacteria	k__norank_d__Bacteria	p__Actinobacteriota	c__Actinobacteria	o__Propionibacteriales	f__Nocardioidaceae	g__Nocardioides	s__unclassified_g__Nocardioides	ASV6117	4	3.27259e-6	0.03125
d__Bacteria	k__norank_d__Bacteria	p__Actinobacteriota	c__Actinobacteria	o__Propionibacteriales	f__Nocardioidaceae	g__Nocardioides	s__unclassified_g__Nocardioides	ASV6167	5	4.09074e-6	0.03125
d__Bacteria	k__norank_d__Bacteria	p__Actinobacteriota	c__Actinobacteria	o__Propionibacteriales	f__Nocardioidaceae	g__Nocardioides	s__unclassified_g__Nocardioides	ASV6171	3	2.45445e-6	0.03125
d__Bacteria	k__norank_d__Bacteria	p__Actinobacteriota	c__Actinobacteria	o__Propionibacteriales	f__Nocardioidaceae	g__Nocardioides	s__unclassified_g__Nocardioides	ASV6174	5	4.09074e-6	0.03125
d__Bacteria	k__norank_d__Bacteria	p__Actinobacteriota	c__Actinobacteria	o__Propionibacteriales	f__Nocardioidaceae	g__Nocardioides	s__unclassified_g__Nocardioides	ASV6360	3	2.45445e-6	0.03125
d__Bacteria	k__norank_d__Bacteria	p__Actinobacteriota	c__Actinobacteria	o__Propionibacteriales	f__Nocardioidaceae	g__Nocardioides	s__unclassified_g__Nocardioides	ASV6366	3	2.45445e-6	0.03125
d__Bacteria	k__norank_d__Bacteria	p__Actinobacteriota	c__Actinobacteria	o__Propionibacteriales	f__Nocardioidaceae	g__Nocardioides	s__unclassified_g__Nocardioides	ASV647	89	7.0E-5	0.25
d__Bacteria	k__norank_d__Bacteria	p__Actinobacteriota	c__Actinobacteria	o__Propionibacteriales	f__Nocardioidaceae	g__Nocardioides	s__unclassified_g__Nocardioides	ASV6485	2	1.6363e-6	0.03125
d__Bacteria	k__norank_d__Bacteria	p__Actinobacteriota	c__Actinobacteria	o__Propionibacteriales	f__Nocardioidaceae	g__Nocardioides	s__unclassified_g__Nocardioides	ASV6720	2	1.6363e-6	0.03125
d__Bacteria	k__norank_d__Bacteria	p__Actinobacteriota	c__Actinobacteria	o__Propionibacteriales	f__Nocardioidaceae	g__Nocardioides	s__unclassified_g__Nocardioides	ASV691	20	2.0E-5	0.09375
d__Bacteria	k__norank_d__Bacteria	p__Actinobacteriota	c__Actinobacteria	o__Propionibacteriales	f__Nocardioidaceae	g__Nocardioides	s__unclassified_g__Nocardioides	ASV7097	12	9.81778e-6	0.03125
d__Bacteria	k__norank_d__Bacteria	p__Actinobacteriota	c__Actinobacteria	o__Propionibacteriales	f__Nocardioidaceae	g__Nocardioides	s__unclassified_g__Nocardioides	ASV7165	8	6.54519e-6	0.03125
d__Bacteria	k__norank_d__Bacteria	p__Actinobacteriota	c__Actinobacteria	o__Propionibacteriales	f__Nocardioidaceae	g__Nocardioides	s__unclassified_g__Nocardioides	ASV7184	7	5.72704e-6	0.03125
d__Bacteria	k__norank_d__Bacteria	p__Actinobacteriota	c__Actinobacteria	o__Propionibacteriales	f__Nocardioidaceae	g__Nocardioides	s__unclassified_g__Nocardioides	ASV7188	7	5.72704e-6	0.03125
d__Bacteria	k__norank_d__Bacteria	p__Actinobacteriota	c__Actinobacteria	o__Propionibacteriales	f__Nocardioidaceae	g__Nocardioides	s__unclassified_g__Nocardioides	ASV7241	5	4.09074e-6	0.03125
d__Bacteria	k__norank_d__Bacteria	p__Actinobacteriota	c__Actinobacteria	o__Propionibacteriales	f__Nocardioidaceae	g__Nocardioides	s__unclassified_g__Nocardioides	ASV731	7	5.72704e-6	0.03125
d__Bacteria	k__norank_d__Bacteria	p__Actinobacteriota	c__Actinobacteria	o__Propionibacteriales	f__Nocardioidaceae	g__Nocardioides	s__unclassified_g__Nocardioides	ASV7689	26	2.0E-5	0.0625
d__Bacteria	k__norank_d__Bacteria	p__Actinobacteriota	c__Actinobacteria	o__Propionibacteriales	f__Nocardioidaceae	g__Nocardioides	s__unclassified_g__Nocardioides	ASV7741	59	5.0E-5	0.0625
d__Bacteria	k__norank_d__Bacteria	p__Actinobacteriota	c__Actinobacteria	o__Propionibacteriales	f__Nocardioidaceae	g__Nocardioides	s__unclassified_g__Nocardioides	ASV781	12	9.81778e-6	0.0625
d__Bacteria	k__norank_d__Bacteria	p__Actinobacteriota	c__Actinobacteria	o__Propionibacteriales	f__Nocardioidaceae	g__Nocardioides	s__unclassified_g__Nocardioides	ASV8296	21	2.0E-5	0.03125
d__Bacteria	k__norank_d__Bacteria	p__Actinobacteriota	c__Actinobacteria	o__Propionibacteriales	f__Nocardioidaceae	g__Nocardioides	s__unclassified_g__Nocardioides	ASV8377	6	4.90889e-6	0.03125
d__Bacteria	k__norank_d__Bacteria	p__Actinobacteriota	c__Actinobacteria	o__Propionibacteriales	f__Nocardioidaceae	g__Nocardioides	s__unclassified_g__Nocardioides	ASV84	819	0.00067	0.65625
d__Bacteria	k__norank_d__Bacteria	p__Actinobacteriota	c__Actinobacteria	o__Propionibacteriales	f__Nocardioidaceae	g__Nocardioides	s__unclassified_g__Nocardioides	ASV8406	4	3.27259e-6	0.03125
d__Bacteria	k__norank_d__Bacteria	p__Actinobacteriota	c__Actinobacteria	o__Propionibacteriales	f__Nocardioidaceae	g__Nocardioides	s__unclassified_g__Nocardioides	ASV8444	4	3.27259e-6	0.03125
d__Bacteria	k__norank_d__Bacteria	p__Actinobacteriota	c__Actinobacteria	o__Propionibacteriales	f__Nocardioidaceae	g__Nocardioides	s__unclassified_g__Nocardioides	ASV8445	4	3.27259e-6	0.03125
d__Bacteria	k__norank_d__Bacteria	p__Actinobacteriota	c__Actinobacteria	o__Propionibacteriales	f__Nocardioidaceae	g__Nocardioides	s__unclassified_g__Nocardioides	ASV8466	3	2.45445e-6	0.03125
d__Bacteria	k__norank_d__Bacteria	p__Actinobacteriota	c__Actinobacteria	o__Propionibacteriales	f__Nocardioidaceae	g__Nocardioides	s__unclassified_g__Nocardioides	ASV8535	2	1.6363e-6	0.03125
d__Bacteria	k__norank_d__Bacteria	p__Actinobacteriota	c__Actinobacteria	o__Propionibacteriales	f__Nocardioidaceae	g__Nocardioides	s__unclassified_g__Nocardioides	ASV8579	166	0.00014	0.28125
d__Bacteria	k__norank_d__Bacteria	p__Actinobacteriota	c__Actinobacteria	o__Propionibacteriales	f__Nocardioidaceae	g__Nocardioides	s__unclassified_g__Nocardioides	ASV8606	15	1.0E-5	0.03125
d__Bacteria	k__norank_d__Bacteria	p__Actinobacteriota	c__Actinobacteria	o__Propionibacteriales	f__Nocardioidaceae	g__Nocardioides	s__unclassified_g__Nocardioides	ASV8642	15	1.0E-5	0.03125
d__Bacteria	k__norank_d__Bacteria	p__Actinobacteriota	c__Actinobacteria	o__Propionibacteriales	f__Nocardioidaceae	g__Nocardioides	s__unclassified_g__Nocardioides	ASV8700	20	2.0E-5	0.0625
d__Bacteria	k__norank_d__Bacteria	p__Actinobacteriota	c__Actinobacteria	o__Propionibacteriales	f__Nocardioidaceae	g__Nocardioides	s__unclassified_g__Nocardioides	ASV8742	7	5.72704e-6	0.03125
d__Bacteria	k__norank_d__Bacteria	p__Actinobacteriota	c__Actinobacteria	o__Propionibacteriales	f__Nocardioidaceae	g__Nocardioides	s__unclassified_g__Nocardioides	ASV8758	8	6.54519e-6	0.03125
d__Bacteria	k__norank_d__Bacteria	p__Actinobacteriota	c__Actinobacteria	o__Propionibacteriales	f__Nocardioidaceae	g__Nocardioides	s__unclassified_g__Nocardioides	ASV8821	4	3.27259e-6	0.03125
d__Bacteria	k__norank_d__Bacteria	p__Actinobacteriota	c__Actinobacteria	o__Propionibacteriales	f__Nocardioidaceae	g__Nocardioides	s__unclassified_g__Nocardioides	ASV8838	2	1.6363e-6	0.03125
d__Bacteria	k__norank_d__Bacteria	p__Actinobacteriota	c__Actinobacteria	o__Propionibacteriales	f__Nocardioidaceae	g__Nocardioides	s__unclassified_g__Nocardioides	ASV8947	3	2.45445e-6	0.03125
d__Bacteria	k__norank_d__Bacteria	p__Actinobacteriota	c__Actinobacteria	o__Propionibacteriales	f__Nocardioidaceae	g__Nocardioides	s__unclassified_g__Nocardioides	ASV9046	2	1.6363e-6	0.03125
d__Bacteria	k__norank_d__Bacteria	p__Actinobacteriota	c__Actinobacteria	o__Propionibacteriales	f__Nocardioidaceae	g__Nocardioides	s__unclassified_g__Nocardioides	ASV9104	5	4.09074e-6	0.03125
d__Bacteria	k__norank_d__Bacteria	p__Actinobacteriota	c__Actinobacteria	o__Propionibacteriales	f__Nocardioidaceae	g__Nocardioides	s__unclassified_g__Nocardioides	ASV976	1	8.18148e-7	0.03125
d__Bacteria	k__norank_d__Bacteria	p__Actinobacteriota	c__Actinobacteria	o__Propionibacteriales	f__Nocardioidaceae	g__Nocardioides	s__unclassified_g__Nocardioides	ASV9898	16	1.0E-5	0.09375
d__Bacteria	k__norank_d__Bacteria	p__Actinobacteriota	c__Actinobacteria	o__Propionibacteriales	f__Nocardioidaceae	g__Tenggerimyces	s__unclassified_g__Tenggerimyces	ASV1120	1	8.18148e-7	0.03125
d__Bacteria	k__norank_d__Bacteria	p__Actinobacteriota	c__Actinobacteria	o__Propionibacteriales	f__Nocardioidaceae	g__Tenggerimyces	s__unclassified_g__Tenggerimyces	ASV714	23	2.0E-5	0.09375
d__Bacteria	k__norank_d__Bacteria	p__Actinobacteriota	c__Actinobacteria	o__Propionibacteriales	f__Nocardioidaceae	g__norank_f__Nocardioidaceae	s__Thermasporomyces_composti	ASV21428	9	7.36334e-6	0.03125
d__Bacteria	k__norank_d__Bacteria	p__Actinobacteriota	c__Actinobacteria	o__Propionibacteriales	f__Nocardioidaceae	g__unclassified_f__Nocardioidaceae	s__unclassified_f__Nocardioidaceae	ASV20120	4	3.27259e-6	0.03125
d__Bacteria	k__norank_d__Bacteria	p__Actinobacteriota	c__Actinobacteria	o__Propionibacteriales	f__Nocardioidaceae	g__unclassified_f__Nocardioidaceae	s__unclassified_f__Nocardioidaceae	ASV20778	7	5.72704e-6	0.03125
d__Bacteria	k__norank_d__Bacteria	p__Actinobacteriota	c__Actinobacteria	o__Propionibacteriales	f__Nocardioidaceae	g__unclassified_f__Nocardioidaceae	s__unclassified_f__Nocardioidaceae	ASV209	161	0.00013	0.28125
d__Bacteria	k__norank_d__Bacteria	p__Actinobacteriota	c__Actinobacteria	o__Propionibacteriales	f__Nocardioidaceae	g__unclassified_f__Nocardioidaceae	s__unclassified_f__Nocardioidaceae	ASV21485	5	4.09074e-6	0.03125
d__Bacteria	k__norank_d__Bacteria	p__Actinobacteriota	c__Actinobacteria	o__Propionibacteriales	f__Nocardioidaceae	g__unclassified_f__Nocardioidaceae	s__unclassified_f__Nocardioidaceae	ASV215	215	0.00018	0.34375
d__Bacteria	k__norank_d__Bacteria	p__Actinobacteriota	c__Actinobacteria	o__Propionibacteriales	f__Nocardioidaceae	g__unclassified_f__Nocardioidaceae	s__unclassified_f__Nocardioidaceae	ASV21720	2	1.6363e-6	0.03125
d__Bacteria	k__norank_d__Bacteria	p__Actinobacteriota	c__Actinobacteria	o__Propionibacteriales	f__Nocardioidaceae	g__unclassified_f__Nocardioidaceae	s__unclassified_f__Nocardioidaceae	ASV21750	2	1.6363e-6	0.03125
d__Bacteria	k__norank_d__Bacteria	p__Actinobacteriota	c__Actinobacteria	o__Propionibacteriales	f__Nocardioidaceae	g__unclassified_f__Nocardioidaceae	s__unclassified_f__Nocardioidaceae	ASV21760	2	1.6363e-6	0.03125
d__Bacteria	k__norank_d__Bacteria	p__Actinobacteriota	c__Actinobacteria	o__Propionibacteriales	f__Nocardioidaceae	g__unclassified_f__Nocardioidaceae	s__unclassified_f__Nocardioidaceae	ASV22322	7	5.72704e-6	0.03125
d__Bacteria	k__norank_d__Bacteria	p__Actinobacteriota	c__Actinobacteria	o__Propionibacteriales	f__Nocardioidaceae	g__unclassified_f__Nocardioidaceae	s__unclassified_f__Nocardioidaceae	ASV23210	21	2.0E-5	0.03125
d__Bacteria	k__norank_d__Bacteria	p__Actinobacteriota	c__Actinobacteria	o__Propionibacteriales	f__Nocardioidaceae	g__unclassified_f__Nocardioidaceae	s__unclassified_f__Nocardioidaceae	ASV25788	8	6.54519e-6	0.03125
d__Bacteria	k__norank_d__Bacteria	p__Actinobacteriota	c__Actinobacteria	o__Propionibacteriales	f__Nocardioidaceae	g__unclassified_f__Nocardioidaceae	s__unclassified_f__Nocardioidaceae	ASV26280	1	8.18148e-7	0.03125
d__Bacteria	k__norank_d__Bacteria	p__Actinobacteriota	c__Actinobacteria	o__Propionibacteriales	f__Nocardioidaceae	g__unclassified_f__Nocardioidaceae	s__unclassified_f__Nocardioidaceae	ASV26340	1	8.18148e-7	0.03125
d__Bacteria	k__norank_d__Bacteria	p__Actinobacteriota	c__Actinobacteria	o__Propionibacteriales	f__Nocardioidaceae	g__unclassified_f__Nocardioidaceae	s__unclassified_f__Nocardioidaceae	ASV26905	2	1.6363e-6	0.03125
d__Bacteria	k__norank_d__Bacteria	p__Actinobacteriota	c__Actinobacteria	o__Propionibacteriales	f__Nocardioidaceae	g__unclassified_f__Nocardioidaceae	s__unclassified_f__Nocardioidaceae	ASV28341	4	3.27259e-6	0.03125
d__Bacteria	k__norank_d__Bacteria	p__Actinobacteriota	c__Actinobacteria	o__Propionibacteriales	f__Nocardioidaceae	g__unclassified_f__Nocardioidaceae	s__unclassified_f__Nocardioidaceae	ASV29637	5	4.09074e-6	0.03125
d__Bacteria	k__norank_d__Bacteria	p__Actinobacteriota	c__Actinobacteria	o__Propionibacteriales	f__Nocardioidaceae	g__unclassified_f__Nocardioidaceae	s__unclassified_f__Nocardioidaceae	ASV29732	3	2.45445e-6	0.03125
d__Bacteria	k__norank_d__Bacteria	p__Actinobacteriota	c__Actinobacteria	o__Propionibacteriales	f__Nocardioidaceae	g__unclassified_f__Nocardioidaceae	s__unclassified_f__Nocardioidaceae	ASV30062	1	8.18148e-7	0.03125
d__Bacteria	k__norank_d__Bacteria	p__Actinobacteriota	c__Actinobacteria	o__Propionibacteriales	f__Nocardioidaceae	g__unclassified_f__Nocardioidaceae	s__unclassified_f__Nocardioidaceae	ASV3013	145	0.00012	0.15625
d__Bacteria	k__norank_d__Bacteria	p__Actinobacteriota	c__Actinobacteria	o__Propionibacteriales	f__Nocardioidaceae	g__unclassified_f__Nocardioidaceae	s__unclassified_f__Nocardioidaceae	ASV32597	2	1.6363e-6	0.03125
d__Bacteria	k__norank_d__Bacteria	p__Actinobacteriota	c__Actinobacteria	o__Propionibacteriales	f__Nocardioidaceae	g__unclassified_f__Nocardioidaceae	s__unclassified_f__Nocardioidaceae	ASV428	140	0.00011	0.28125
d__Bacteria	k__norank_d__Bacteria	p__Actinobacteriota	c__Actinobacteria	o__Propionibacteriales	f__Nocardioidaceae	g__unclassified_f__Nocardioidaceae	s__unclassified_f__Nocardioidaceae	ASV4609	18	1.0E-5	0.0625
d__Bacteria	k__norank_d__Bacteria	p__Actinobacteriota	c__Actinobacteria	o__Propionibacteriales	f__Nocardioidaceae	g__unclassified_f__Nocardioidaceae	s__unclassified_f__Nocardioidaceae	ASV498	86	7.0E-5	0.25
d__Bacteria	k__norank_d__Bacteria	p__Actinobacteriota	c__Actinobacteria	o__Propionibacteriales	f__Nocardioidaceae	g__unclassified_f__Nocardioidaceae	s__unclassified_f__Nocardioidaceae	ASV6152	4	3.27259e-6	0.03125
d__Bacteria	k__norank_d__Bacteria	p__Actinobacteriota	c__Actinobacteria	o__Propionibacteriales	f__Nocardioidaceae	g__unclassified_f__Nocardioidaceae	s__unclassified_f__Nocardioidaceae	ASV7059	20	2.0E-5	0.03125
d__Bacteria	k__norank_d__Bacteria	p__Actinobacteriota	c__Actinobacteria	o__Propionibacteriales	f__Nocardioidaceae	g__unclassified_f__Nocardioidaceae	s__unclassified_f__Nocardioidaceae	ASV7683	6	4.90889e-6	0.03125
d__Bacteria	k__norank_d__Bacteria	p__Actinobacteriota	c__Actinobacteria	o__Propionibacteriales	f__Nocardioidaceae	g__unclassified_f__Nocardioidaceae	s__unclassified_f__Nocardioidaceae	ASV8920	2	1.6363e-6	0.03125
d__Bacteria	k__norank_d__Bacteria	p__Actinobacteriota	c__Actinobacteria	o__Propionibacteriales	f__Nocardioidaceae	g__unclassified_f__Nocardioidaceae	s__unclassified_f__Nocardioidaceae	ASV911	2	1.6363e-6	0.03125
d__Bacteria	k__norank_d__Bacteria	p__Actinobacteriota	c__Actinobacteria	o__Propionibacteriales	f__Propionibacteriaceae	g__Acidipropionibacterium	s__unclassified_g__Acidipropionibacterium	ASV1197	14	1.0E-5	0.125
d__Bacteria	k__norank_d__Bacteria	p__Actinobacteriota	c__Actinobacteria	o__Propionibacteriales	f__Propionibacteriaceae	g__Acidipropionibacterium	s__unclassified_g__Acidipropionibacterium	ASV22758	2	1.6363e-6	0.03125
d__Bacteria	k__norank_d__Bacteria	p__Actinobacteriota	c__Actinobacteria	o__Propionibacteriales	f__Propionibacteriaceae	g__Haloactinopolyspora	s__uncultured_bacterium_g__Haloactinopolyspora	ASV20625	18	1.0E-5	0.03125
d__Bacteria	k__norank_d__Bacteria	p__Actinobacteriota	c__Actinobacteria	o__Propionibacteriales	f__Propionibacteriaceae	g__Jiangella	s__unclassified_g__Jiangella	ASV429	33	3.0E-5	0.09375
d__Bacteria	k__norank_d__Bacteria	p__Actinobacteriota	c__Actinobacteria	o__Propionibacteriales	f__Propionibacteriaceae	g__Jiangella	s__unclassified_g__Jiangella	ASV4659	9	7.36334e-6	0.0625
d__Bacteria	k__norank_d__Bacteria	p__Actinobacteriota	c__Actinobacteria	o__Propionibacteriales	f__Propionibacteriaceae	g__Jiangella	s__unclassified_g__Jiangella	ASV8612	12	9.81778e-6	0.03125
d__Bacteria	k__norank_d__Bacteria	p__Actinobacteriota	c__Actinobacteria	o__Propionibacteriales	f__Propionibacteriaceae	g__Marinilutecoccus	s__uncultured_bacterium_g__Marinilutecoccus	ASV21655	3	2.45445e-6	0.03125
d__Bacteria	k__norank_d__Bacteria	p__Actinobacteriota	c__Actinobacteria	o__Propionibacteriales	f__Propionibacteriaceae	g__Microlunatus	s__unclassified_g__Microlunatus	ASV1492	7	5.72704e-6	0.03125
d__Bacteria	k__norank_d__Bacteria	p__Actinobacteriota	c__Actinobacteria	o__Propionibacteriales	f__Propionibacteriaceae	g__Microlunatus	s__unclassified_g__Microlunatus	ASV1769	229	0.00019	0.21875
d__Bacteria	k__norank_d__Bacteria	p__Actinobacteriota	c__Actinobacteria	o__Propionibacteriales	f__Propionibacteriaceae	g__Microlunatus	s__unclassified_g__Microlunatus	ASV22886	1	8.18148e-7	0.03125
d__Bacteria	k__norank_d__Bacteria	p__Actinobacteriota	c__Actinobacteria	o__Propionibacteriales	f__Propionibacteriaceae	g__Microlunatus	s__unclassified_g__Microlunatus	ASV640	68	6.0E-5	0.15625
d__Bacteria	k__norank_d__Bacteria	p__Actinobacteriota	c__Actinobacteria	o__Propionibacteriales	f__Propionibacteriaceae	g__Microlunatus	s__unclassified_g__Microlunatus	ASV7639	10	8.18148e-6	0.03125
d__Bacteria	k__norank_d__Bacteria	p__Actinobacteriota	c__Actinobacteria	o__Propionibacteriales	f__Propionibacteriaceae	g__Microlunatus	s__unclassified_g__Microlunatus	ASV8565	81	7.0E-5	0.15625
d__Bacteria	k__norank_d__Bacteria	p__Actinobacteriota	c__Actinobacteria	o__Propionibacteriales	f__Propionibacteriaceae	g__unclassified_f__Propionibacteriaceae	s__unclassified_f__Propionibacteriaceae	ASV20985	3	2.45445e-6	0.03125
d__Bacteria	k__norank_d__Bacteria	p__Actinobacteriota	c__Actinobacteria	o__Propionibacteriales	f__Propionibacteriaceae	g__unclassified_f__Propionibacteriaceae	s__unclassified_f__Propionibacteriaceae	ASV21508	5	4.09074e-6	0.03125
d__Bacteria	k__norank_d__Bacteria	p__Actinobacteriota	c__Actinobacteria	o__Propionibacteriales	f__Propionibacteriaceae	g__unclassified_f__Propionibacteriaceae	s__unclassified_f__Propionibacteriaceae	ASV26744	3	2.45445e-6	0.03125
d__Bacteria	k__norank_d__Bacteria	p__Actinobacteriota	c__Actinobacteria	o__Propionibacteriales	f__Propionibacteriaceae	g__unclassified_f__Propionibacteriaceae	s__unclassified_f__Propionibacteriaceae	ASV27035	1	8.18148e-7	0.03125
d__Bacteria	k__norank_d__Bacteria	p__Actinobacteriota	c__Actinobacteria	o__Propionibacteriales	f__Propionibacteriaceae	g__unclassified_f__Propionibacteriaceae	s__unclassified_f__Propionibacteriaceae	ASV294	50	4.0E-5	0.125
d__Bacteria	k__norank_d__Bacteria	p__Actinobacteriota	c__Actinobacteria	o__Propionibacteriales	f__Propionibacteriaceae	g__unclassified_f__Propionibacteriaceae	s__unclassified_f__Propionibacteriaceae	ASV29901	1	8.18148e-7	0.03125
d__Bacteria	k__norank_d__Bacteria	p__Actinobacteriota	c__Actinobacteria	o__Propionibacteriales	f__Propionibacteriaceae	g__unclassified_f__Propionibacteriaceae	s__unclassified_f__Propionibacteriaceae	ASV4365	12	9.81778e-6	0.03125
d__Bacteria	k__norank_d__Bacteria	p__Actinobacteriota	c__Actinobacteria	o__Propionibacteriales	f__Propionibacteriaceae	g__unclassified_f__Propionibacteriaceae	s__unclassified_f__Propionibacteriaceae	ASV995	4	3.27259e-6	0.03125
d__Bacteria	k__norank_d__Bacteria	p__Actinobacteriota	c__Actinobacteria	o__Propionibacteriales	f__unclassified_o__Propionibacteriales	g__unclassified_o__Propionibacteriales	s__unclassified_o__Propionibacteriales	ASV22668	2	1.6363e-6	0.03125
d__Bacteria	k__norank_d__Bacteria	p__Actinobacteriota	c__Actinobacteria	o__Propionibacteriales	f__unclassified_o__Propionibacteriales	g__unclassified_o__Propionibacteriales	s__unclassified_o__Propionibacteriales	ASV22672	2	1.6363e-6	0.03125
d__Bacteria	k__norank_d__Bacteria	p__Actinobacteriota	c__Actinobacteria	o__Propionibacteriales	f__unclassified_o__Propionibacteriales	g__unclassified_o__Propionibacteriales	s__unclassified_o__Propionibacteriales	ASV26361	1	8.18148e-7	0.03125
d__Bacteria	k__norank_d__Bacteria	p__Actinobacteriota	c__Actinobacteria	o__Propionibacteriales	f__unclassified_o__Propionibacteriales	g__unclassified_o__Propionibacteriales	s__unclassified_o__Propionibacteriales	ASV26367	2	1.6363e-6	0.03125
d__Bacteria	k__norank_d__Bacteria	p__Actinobacteriota	c__Actinobacteria	o__Propionibacteriales	f__unclassified_o__Propionibacteriales	g__unclassified_o__Propionibacteriales	s__unclassified_o__Propionibacteriales	ASV26752	4	3.27259e-6	0.03125
d__Bacteria	k__norank_d__Bacteria	p__Actinobacteriota	c__Actinobacteria	o__Propionibacteriales	f__unclassified_o__Propionibacteriales	g__unclassified_o__Propionibacteriales	s__unclassified_o__Propionibacteriales	ASV26822	4	3.27259e-6	0.03125
d__Bacteria	k__norank_d__Bacteria	p__Actinobacteriota	c__Actinobacteria	o__Propionibacteriales	f__unclassified_o__Propionibacteriales	g__unclassified_o__Propionibacteriales	s__unclassified_o__Propionibacteriales	ASV26898	4	3.27259e-6	0.03125
d__Bacteria	k__norank_d__Bacteria	p__Actinobacteriota	c__Actinobacteria	o__Propionibacteriales	f__unclassified_o__Propionibacteriales	g__unclassified_o__Propionibacteriales	s__unclassified_o__Propionibacteriales	ASV27218	1	8.18148e-7	0.03125
d__Bacteria	k__norank_d__Bacteria	p__Actinobacteriota	c__Actinobacteria	o__Propionibacteriales	f__unclassified_o__Propionibacteriales	g__unclassified_o__Propionibacteriales	s__unclassified_o__Propionibacteriales	ASV29634	5	4.09074e-6	0.03125
d__Bacteria	k__norank_d__Bacteria	p__Actinobacteriota	c__Actinobacteria	o__Propionibacteriales	f__unclassified_o__Propionibacteriales	g__unclassified_o__Propionibacteriales	s__unclassified_o__Propionibacteriales	ASV32502	7	5.72704e-6	0.03125
d__Bacteria	k__norank_d__Bacteria	p__Actinobacteriota	c__Actinobacteria	o__Propionibacteriales	f__unclassified_o__Propionibacteriales	g__unclassified_o__Propionibacteriales	s__unclassified_o__Propionibacteriales	ASV4912	2	1.6363e-6	0.03125
d__Bacteria	k__norank_d__Bacteria	p__Actinobacteriota	c__Actinobacteria	o__Propionibacteriales	f__unclassified_o__Propionibacteriales	g__unclassified_o__Propionibacteriales	s__unclassified_o__Propionibacteriales	ASV4931	2	1.6363e-6	0.03125
d__Bacteria	k__norank_d__Bacteria	p__Actinobacteriota	c__Actinobacteria	o__Propionibacteriales	f__unclassified_o__Propionibacteriales	g__unclassified_o__Propionibacteriales	s__unclassified_o__Propionibacteriales	ASV6196	3	2.45445e-6	0.03125
d__Bacteria	k__norank_d__Bacteria	p__Actinobacteriota	c__Actinobacteria	o__Propionibacteriales	f__unclassified_o__Propionibacteriales	g__unclassified_o__Propionibacteriales	s__unclassified_o__Propionibacteriales	ASV7191	7	5.72704e-6	0.03125
d__Bacteria	k__norank_d__Bacteria	p__Actinobacteriota	c__Actinobacteria	o__Propionibacteriales	f__unclassified_o__Propionibacteriales	g__unclassified_o__Propionibacteriales	s__unclassified_o__Propionibacteriales	ASV848	5	4.09074e-6	0.03125
d__Bacteria	k__norank_d__Bacteria	p__Actinobacteriota	c__Actinobacteria	o__Pseudonocardiales	f__Pseudonocardiaceae	g__Actinomycetospora	s__unclassified_g__Actinomycetospora	ASV20630	19	2.0E-5	0.03125
d__Bacteria	k__norank_d__Bacteria	p__Actinobacteriota	c__Actinobacteria	o__Pseudonocardiales	f__Pseudonocardiaceae	g__Actinomycetospora	s__unclassified_g__Actinomycetospora	ASV22199	23	2.0E-5	0.03125
d__Bacteria	k__norank_d__Bacteria	p__Actinobacteriota	c__Actinobacteria	o__Pseudonocardiales	f__Pseudonocardiaceae	g__Actinomycetospora	s__unclassified_g__Actinomycetospora	ASV22803	1	8.18148e-7	0.03125
d__Bacteria	k__norank_d__Bacteria	p__Actinobacteriota	c__Actinobacteria	o__Pseudonocardiales	f__Pseudonocardiaceae	g__Actinomycetospora	s__unclassified_g__Actinomycetospora	ASV234	204	0.00017	0.25
d__Bacteria	k__norank_d__Bacteria	p__Actinobacteriota	c__Actinobacteria	o__Pseudonocardiales	f__Pseudonocardiaceae	g__Actinomycetospora	s__unclassified_g__Actinomycetospora	ASV29436	14	1.0E-5	0.03125
d__Bacteria	k__norank_d__Bacteria	p__Actinobacteriota	c__Actinobacteria	o__Pseudonocardiales	f__Pseudonocardiaceae	g__Actinomycetospora	s__unclassified_g__Actinomycetospora	ASV4521	45	4.0E-5	0.125
d__Bacteria	k__norank_d__Bacteria	p__Actinobacteriota	c__Actinobacteria	o__Pseudonocardiales	f__Pseudonocardiaceae	g__Actinomycetospora	s__unclassified_g__Actinomycetospora	ASV4865	1	8.18148e-7	0.03125
d__Bacteria	k__norank_d__Bacteria	p__Actinobacteriota	c__Actinobacteria	o__Pseudonocardiales	f__Pseudonocardiaceae	g__Actinomycetospora	s__unclassified_g__Actinomycetospora	ASV5236	4	3.27259e-6	0.03125
d__Bacteria	k__norank_d__Bacteria	p__Actinobacteriota	c__Actinobacteria	o__Pseudonocardiales	f__Pseudonocardiaceae	g__Actinomycetospora	s__unclassified_g__Actinomycetospora	ASV8559	102	8.0E-5	0.125
d__Bacteria	k__norank_d__Bacteria	p__Actinobacteriota	c__Actinobacteria	o__Pseudonocardiales	f__Pseudonocardiaceae	g__Actinophytocola	s__Actinophytocola_sediminis	ASV26477	14	1.0E-5	0.03125
d__Bacteria	k__norank_d__Bacteria	p__Actinobacteriota	c__Actinobacteria	o__Pseudonocardiales	f__Pseudonocardiaceae	g__Actinophytocola	s__Punica_granatum_pomegranate_g__Actinophytocola	ASV1776	29	2.0E-5	0.03125
d__Bacteria	k__norank_d__Bacteria	p__Actinobacteriota	c__Actinobacteria	o__Pseudonocardiales	f__Pseudonocardiaceae	g__Actinophytocola	s__Punica_granatum_pomegranate_g__Actinophytocola	ASV777	27	2.0E-5	0.09375
d__Bacteria	k__norank_d__Bacteria	p__Actinobacteriota	c__Actinobacteria	o__Pseudonocardiales	f__Pseudonocardiaceae	g__Actinophytocola	s__unclassified_g__Actinophytocola	ASV101	431	0.00035	0.21875
d__Bacteria	k__norank_d__Bacteria	p__Actinobacteriota	c__Actinobacteria	o__Pseudonocardiales	f__Pseudonocardiaceae	g__Actinophytocola	s__unclassified_g__Actinophytocola	ASV151	2365	0.00193	0.53125
d__Bacteria	k__norank_d__Bacteria	p__Actinobacteriota	c__Actinobacteria	o__Pseudonocardiales	f__Pseudonocardiaceae	g__Actinophytocola	s__unclassified_g__Actinophytocola	ASV179	1073	0.00088	0.40625
d__Bacteria	k__norank_d__Bacteria	p__Actinobacteriota	c__Actinobacteria	o__Pseudonocardiales	f__Pseudonocardiaceae	g__Actinophytocola	s__unclassified_g__Actinophytocola	ASV20075	3	2.45445e-6	0.03125
d__Bacteria	k__norank_d__Bacteria	p__Actinobacteriota	c__Actinobacteria	o__Pseudonocardiales	f__Pseudonocardiaceae	g__Actinophytocola	s__unclassified_g__Actinophytocola	ASV20584	34	3.0E-5	0.03125
d__Bacteria	k__norank_d__Bacteria	p__Actinobacteriota	c__Actinobacteria	o__Pseudonocardiales	f__Pseudonocardiaceae	g__Actinophytocola	s__unclassified_g__Actinophytocola	ASV20585	29	2.0E-5	0.03125
d__Bacteria	k__norank_d__Bacteria	p__Actinobacteriota	c__Actinobacteria	o__Pseudonocardiales	f__Pseudonocardiaceae	g__Actinophytocola	s__unclassified_g__Actinophytocola	ASV20592	26	2.0E-5	0.03125
d__Bacteria	k__norank_d__Bacteria	p__Actinobacteriota	c__Actinobacteria	o__Pseudonocardiales	f__Pseudonocardiaceae	g__Actinophytocola	s__unclassified_g__Actinophytocola	ASV20884	4	3.27259e-6	0.03125
d__Bacteria	k__norank_d__Bacteria	p__Actinobacteriota	c__Actinobacteria	o__Pseudonocardiales	f__Pseudonocardiaceae	g__Actinophytocola	s__unclassified_g__Actinophytocola	ASV22460	5	4.09074e-6	0.03125
d__Bacteria	k__norank_d__Bacteria	p__Actinobacteriota	c__Actinobacteria	o__Pseudonocardiales	f__Pseudonocardiaceae	g__Actinophytocola	s__unclassified_g__Actinophytocola	ASV2296	156	0.00013	0.09375
d__Bacteria	k__norank_d__Bacteria	p__Actinobacteriota	c__Actinobacteria	o__Pseudonocardiales	f__Pseudonocardiaceae	g__Actinophytocola	s__unclassified_g__Actinophytocola	ASV26055	4	3.27259e-6	0.03125
d__Bacteria	k__norank_d__Bacteria	p__Actinobacteriota	c__Actinobacteria	o__Pseudonocardiales	f__Pseudonocardiaceae	g__Actinophytocola	s__unclassified_g__Actinophytocola	ASV26084	4	3.27259e-6	0.03125
d__Bacteria	k__norank_d__Bacteria	p__Actinobacteriota	c__Actinobacteria	o__Pseudonocardiales	f__Pseudonocardiaceae	g__Actinophytocola	s__unclassified_g__Actinophytocola	ASV2944	54	4.0E-5	0.03125
d__Bacteria	k__norank_d__Bacteria	p__Actinobacteriota	c__Actinobacteria	o__Pseudonocardiales	f__Pseudonocardiaceae	g__Actinophytocola	s__unclassified_g__Actinophytocola	ASV29443	9	7.36334e-6	0.03125
d__Bacteria	k__norank_d__Bacteria	p__Actinobacteriota	c__Actinobacteria	o__Pseudonocardiales	f__Pseudonocardiaceae	g__Actinophytocola	s__unclassified_g__Actinophytocola	ASV29562	5	4.09074e-6	0.03125
d__Bacteria	k__norank_d__Bacteria	p__Actinobacteriota	c__Actinobacteria	o__Pseudonocardiales	f__Pseudonocardiaceae	g__Actinophytocola	s__unclassified_g__Actinophytocola	ASV319	16	1.0E-5	0.03125
d__Bacteria	k__norank_d__Bacteria	p__Actinobacteriota	c__Actinobacteria	o__Pseudonocardiales	f__Pseudonocardiaceae	g__Actinophytocola	s__unclassified_g__Actinophytocola	ASV4255	141	0.00012	0.09375
d__Bacteria	k__norank_d__Bacteria	p__Actinobacteriota	c__Actinobacteria	o__Pseudonocardiales	f__Pseudonocardiaceae	g__Actinophytocola	s__unclassified_g__Actinophytocola	ASV5184	279	0.00023	0.21875
d__Bacteria	k__norank_d__Bacteria	p__Actinobacteriota	c__Actinobacteria	o__Pseudonocardiales	f__Pseudonocardiaceae	g__Actinophytocola	s__unclassified_g__Actinophytocola	ASV551	9	7.36334e-6	0.03125
d__Bacteria	k__norank_d__Bacteria	p__Actinobacteriota	c__Actinobacteria	o__Pseudonocardiales	f__Pseudonocardiaceae	g__Actinophytocola	s__unclassified_g__Actinophytocola	ASV63	1215	0.00099	0.53125
d__Bacteria	k__norank_d__Bacteria	p__Actinobacteriota	c__Actinobacteria	o__Pseudonocardiales	f__Pseudonocardiaceae	g__Actinophytocola	s__unclassified_g__Actinophytocola	ASV6707	3	2.45445e-6	0.03125
d__Bacteria	k__norank_d__Bacteria	p__Actinobacteriota	c__Actinobacteria	o__Pseudonocardiales	f__Pseudonocardiaceae	g__Actinophytocola	s__unclassified_g__Actinophytocola	ASV6765	63	5.0E-5	0.0625
d__Bacteria	k__norank_d__Bacteria	p__Actinobacteriota	c__Actinobacteria	o__Pseudonocardiales	f__Pseudonocardiaceae	g__Actinophytocola	s__unclassified_g__Actinophytocola	ASV7229	6	4.90889e-6	0.03125
d__Bacteria	k__norank_d__Bacteria	p__Actinobacteriota	c__Actinobacteria	o__Pseudonocardiales	f__Pseudonocardiaceae	g__Actinophytocola	s__unclassified_g__Actinophytocola	ASV7710	50	4.0E-5	0.09375
d__Bacteria	k__norank_d__Bacteria	p__Actinobacteriota	c__Actinobacteria	o__Pseudonocardiales	f__Pseudonocardiaceae	g__Actinophytocola	s__unclassified_g__Actinophytocola	ASV866	5	4.09074e-6	0.03125
d__Bacteria	k__norank_d__Bacteria	p__Actinobacteriota	c__Actinobacteria	o__Pseudonocardiales	f__Pseudonocardiaceae	g__Actinophytocola	s__uncultured_bacterium_g__Actinophytocola	ASV22323	14	1.0E-5	0.0625
d__Bacteria	k__norank_d__Bacteria	p__Actinobacteriota	c__Actinobacteria	o__Pseudonocardiales	f__Pseudonocardiaceae	g__Actinophytocola	s__uncultured_bacterium_g__Actinophytocola	ASV2308	26	2.0E-5	0.03125
d__Bacteria	k__norank_d__Bacteria	p__Actinobacteriota	c__Actinobacteria	o__Pseudonocardiales	f__Pseudonocardiaceae	g__Actinophytocola	s__uncultured_bacterium_g__Actinophytocola	ASV2968	58	5.0E-5	0.0625
d__Bacteria	k__norank_d__Bacteria	p__Actinobacteriota	c__Actinobacteria	o__Pseudonocardiales	f__Pseudonocardiaceae	g__Actinophytocola	s__uncultured_bacterium_g__Actinophytocola	ASV2983	278	0.00023	0.15625
d__Bacteria	k__norank_d__Bacteria	p__Actinobacteriota	c__Actinobacteria	o__Pseudonocardiales	f__Pseudonocardiaceae	g__Actinophytocola	s__uncultured_bacterium_g__Actinophytocola	ASV3218	1289	0.00105	0.15625
d__Bacteria	k__norank_d__Bacteria	p__Actinobacteriota	c__Actinobacteria	o__Pseudonocardiales	f__Pseudonocardiaceae	g__Actinophytocola	s__uncultured_bacterium_g__Actinophytocola	ASV4282	47	4.0E-5	0.0625
d__Bacteria	k__norank_d__Bacteria	p__Actinobacteriota	c__Actinobacteria	o__Pseudonocardiales	f__Pseudonocardiaceae	g__Actinophytocola	s__uncultured_bacterium_g__Actinophytocola	ASV75	1986	0.00162	0.46875
d__Bacteria	k__norank_d__Bacteria	p__Actinobacteriota	c__Actinobacteria	o__Pseudonocardiales	f__Pseudonocardiaceae	g__Actinophytocola	s__uncultured_bacterium_g__Actinophytocola	ASV8607	47	4.0E-5	0.0625
d__Bacteria	k__norank_d__Bacteria	p__Actinobacteriota	c__Actinobacteria	o__Pseudonocardiales	f__Pseudonocardiaceae	g__Actinophytocola	s__uncultured_bacterium_g__Actinophytocola	ASV8786	5	4.09074e-6	0.03125
d__Bacteria	k__norank_d__Bacteria	p__Actinobacteriota	c__Actinobacteria	o__Pseudonocardiales	f__Pseudonocardiaceae	g__Amycolatopsis	s__unclassified_g__Amycolatopsis	ASV1412	140	0.00011	0.3125
d__Bacteria	k__norank_d__Bacteria	p__Actinobacteriota	c__Actinobacteria	o__Pseudonocardiales	f__Pseudonocardiaceae	g__Amycolatopsis	s__unclassified_g__Amycolatopsis	ASV1558	346	0.00028	0.375
d__Bacteria	k__norank_d__Bacteria	p__Actinobacteriota	c__Actinobacteria	o__Pseudonocardiales	f__Pseudonocardiaceae	g__Amycolatopsis	s__unclassified_g__Amycolatopsis	ASV20537	2	1.6363e-6	0.03125
d__Bacteria	k__norank_d__Bacteria	p__Actinobacteriota	c__Actinobacteria	o__Pseudonocardiales	f__Pseudonocardiaceae	g__Amycolatopsis	s__unclassified_g__Amycolatopsis	ASV21076	1	8.18148e-7	0.03125
d__Bacteria	k__norank_d__Bacteria	p__Actinobacteriota	c__Actinobacteria	o__Pseudonocardiales	f__Pseudonocardiaceae	g__Amycolatopsis	s__unclassified_g__Amycolatopsis	ASV21122	1	8.18148e-7	0.03125
d__Bacteria	k__norank_d__Bacteria	p__Actinobacteriota	c__Actinobacteria	o__Pseudonocardiales	f__Pseudonocardiaceae	g__Amycolatopsis	s__unclassified_g__Amycolatopsis	ASV21208	20	2.0E-5	0.03125
d__Bacteria	k__norank_d__Bacteria	p__Actinobacteriota	c__Actinobacteria	o__Pseudonocardiales	f__Pseudonocardiaceae	g__Amycolatopsis	s__unclassified_g__Amycolatopsis	ASV21416	7	5.72704e-6	0.03125
d__Bacteria	k__norank_d__Bacteria	p__Actinobacteriota	c__Actinobacteria	o__Pseudonocardiales	f__Pseudonocardiaceae	g__Amycolatopsis	s__unclassified_g__Amycolatopsis	ASV21433	7	5.72704e-6	0.03125
d__Bacteria	k__norank_d__Bacteria	p__Actinobacteriota	c__Actinobacteria	o__Pseudonocardiales	f__Pseudonocardiaceae	g__Amycolatopsis	s__unclassified_g__Amycolatopsis	ASV21437	6	4.90889e-6	0.03125
d__Bacteria	k__norank_d__Bacteria	p__Actinobacteriota	c__Actinobacteria	o__Pseudonocardiales	f__Pseudonocardiaceae	g__Amycolatopsis	s__unclassified_g__Amycolatopsis	ASV21583	2	1.6363e-6	0.03125
d__Bacteria	k__norank_d__Bacteria	p__Actinobacteriota	c__Actinobacteria	o__Pseudonocardiales	f__Pseudonocardiaceae	g__Amycolatopsis	s__unclassified_g__Amycolatopsis	ASV21875	2	1.6363e-6	0.03125
d__Bacteria	k__norank_d__Bacteria	p__Actinobacteriota	c__Actinobacteria	o__Pseudonocardiales	f__Pseudonocardiaceae	g__Amycolatopsis	s__unclassified_g__Amycolatopsis	ASV22	2770	0.00227	0.84375
d__Bacteria	k__norank_d__Bacteria	p__Actinobacteriota	c__Actinobacteria	o__Pseudonocardiales	f__Pseudonocardiaceae	g__Amycolatopsis	s__unclassified_g__Amycolatopsis	ASV22321	10	8.18148e-6	0.03125
d__Bacteria	k__norank_d__Bacteria	p__Actinobacteriota	c__Actinobacteria	o__Pseudonocardiales	f__Pseudonocardiaceae	g__Amycolatopsis	s__unclassified_g__Amycolatopsis	ASV22470	4	3.27259e-6	0.03125
d__Bacteria	k__norank_d__Bacteria	p__Actinobacteriota	c__Actinobacteria	o__Pseudonocardiales	f__Pseudonocardiaceae	g__Amycolatopsis	s__unclassified_g__Amycolatopsis	ASV22487	7	5.72704e-6	0.03125
d__Bacteria	k__norank_d__Bacteria	p__Actinobacteriota	c__Actinobacteria	o__Pseudonocardiales	f__Pseudonocardiaceae	g__Amycolatopsis	s__unclassified_g__Amycolatopsis	ASV22731	3	2.45445e-6	0.03125
d__Bacteria	k__norank_d__Bacteria	p__Actinobacteriota	c__Actinobacteria	o__Pseudonocardiales	f__Pseudonocardiaceae	g__Amycolatopsis	s__unclassified_g__Amycolatopsis	ASV2301	178	0.00015	0.125
d__Bacteria	k__norank_d__Bacteria	p__Actinobacteriota	c__Actinobacteria	o__Pseudonocardiales	f__Pseudonocardiaceae	g__Amycolatopsis	s__unclassified_g__Amycolatopsis	ASV23339	7	5.72704e-6	0.03125
d__Bacteria	k__norank_d__Bacteria	p__Actinobacteriota	c__Actinobacteria	o__Pseudonocardiales	f__Pseudonocardiaceae	g__Amycolatopsis	s__unclassified_g__Amycolatopsis	ASV23407	5	4.09074e-6	0.03125
d__Bacteria	k__norank_d__Bacteria	p__Actinobacteriota	c__Actinobacteria	o__Pseudonocardiales	f__Pseudonocardiaceae	g__Amycolatopsis	s__unclassified_g__Amycolatopsis	ASV23437	4	3.27259e-6	0.03125
d__Bacteria	k__norank_d__Bacteria	p__Actinobacteriota	c__Actinobacteria	o__Pseudonocardiales	f__Pseudonocardiaceae	g__Amycolatopsis	s__unclassified_g__Amycolatopsis	ASV25329	9	7.36334e-6	0.03125
d__Bacteria	k__norank_d__Bacteria	p__Actinobacteriota	c__Actinobacteria	o__Pseudonocardiales	f__Pseudonocardiaceae	g__Amycolatopsis	s__unclassified_g__Amycolatopsis	ASV26098	2	1.6363e-6	0.03125
d__Bacteria	k__norank_d__Bacteria	p__Actinobacteriota	c__Actinobacteria	o__Pseudonocardiales	f__Pseudonocardiaceae	g__Amycolatopsis	s__unclassified_g__Amycolatopsis	ASV26618	4	3.27259e-6	0.03125
d__Bacteria	k__norank_d__Bacteria	p__Actinobacteriota	c__Actinobacteria	o__Pseudonocardiales	f__Pseudonocardiaceae	g__Amycolatopsis	s__unclassified_g__Amycolatopsis	ASV27225	2	1.6363e-6	0.03125
d__Bacteria	k__norank_d__Bacteria	p__Actinobacteriota	c__Actinobacteria	o__Pseudonocardiales	f__Pseudonocardiaceae	g__Amycolatopsis	s__unclassified_g__Amycolatopsis	ASV2934	12	9.81778e-6	0.03125
d__Bacteria	k__norank_d__Bacteria	p__Actinobacteriota	c__Actinobacteria	o__Pseudonocardiales	f__Pseudonocardiaceae	g__Amycolatopsis	s__unclassified_g__Amycolatopsis	ASV29354	2	1.6363e-6	0.03125
d__Bacteria	k__norank_d__Bacteria	p__Actinobacteriota	c__Actinobacteria	o__Pseudonocardiales	f__Pseudonocardiaceae	g__Amycolatopsis	s__unclassified_g__Amycolatopsis	ASV29496	7	5.72704e-6	0.03125
d__Bacteria	k__norank_d__Bacteria	p__Actinobacteriota	c__Actinobacteria	o__Pseudonocardiales	f__Pseudonocardiaceae	g__Amycolatopsis	s__unclassified_g__Amycolatopsis	ASV29543	4	3.27259e-6	0.03125
d__Bacteria	k__norank_d__Bacteria	p__Actinobacteriota	c__Actinobacteria	o__Pseudonocardiales	f__Pseudonocardiaceae	g__Amycolatopsis	s__unclassified_g__Amycolatopsis	ASV29571	6	4.90889e-6	0.03125
d__Bacteria	k__norank_d__Bacteria	p__Actinobacteriota	c__Actinobacteria	o__Pseudonocardiales	f__Pseudonocardiaceae	g__Amycolatopsis	s__unclassified_g__Amycolatopsis	ASV30099	1	8.18148e-7	0.03125
d__Bacteria	k__norank_d__Bacteria	p__Actinobacteriota	c__Actinobacteria	o__Pseudonocardiales	f__Pseudonocardiaceae	g__Amycolatopsis	s__unclassified_g__Amycolatopsis	ASV3019	1174	0.00096	0.59375
d__Bacteria	k__norank_d__Bacteria	p__Actinobacteriota	c__Actinobacteria	o__Pseudonocardiales	f__Pseudonocardiaceae	g__Amycolatopsis	s__unclassified_g__Amycolatopsis	ASV4616	6	4.90889e-6	0.03125
d__Bacteria	k__norank_d__Bacteria	p__Actinobacteriota	c__Actinobacteria	o__Pseudonocardiales	f__Pseudonocardiaceae	g__Amycolatopsis	s__unclassified_g__Amycolatopsis	ASV491	9	7.36334e-6	0.03125
d__Bacteria	k__norank_d__Bacteria	p__Actinobacteriota	c__Actinobacteria	o__Pseudonocardiales	f__Pseudonocardiaceae	g__Amycolatopsis	s__unclassified_g__Amycolatopsis	ASV5971	9	7.36334e-6	0.03125
d__Bacteria	k__norank_d__Bacteria	p__Actinobacteriota	c__Actinobacteria	o__Pseudonocardiales	f__Pseudonocardiaceae	g__Amycolatopsis	s__unclassified_g__Amycolatopsis	ASV6070	7	5.72704e-6	0.03125
d__Bacteria	k__norank_d__Bacteria	p__Actinobacteriota	c__Actinobacteria	o__Pseudonocardiales	f__Pseudonocardiaceae	g__Amycolatopsis	s__unclassified_g__Amycolatopsis	ASV6212	2	1.6363e-6	0.03125
d__Bacteria	k__norank_d__Bacteria	p__Actinobacteriota	c__Actinobacteria	o__Pseudonocardiales	f__Pseudonocardiaceae	g__Amycolatopsis	s__unclassified_g__Amycolatopsis	ASV6252	4	3.27259e-6	0.03125
d__Bacteria	k__norank_d__Bacteria	p__Actinobacteriota	c__Actinobacteria	o__Pseudonocardiales	f__Pseudonocardiaceae	g__Amycolatopsis	s__unclassified_g__Amycolatopsis	ASV6713	3	2.45445e-6	0.03125
d__Bacteria	k__norank_d__Bacteria	p__Actinobacteriota	c__Actinobacteria	o__Pseudonocardiales	f__Pseudonocardiaceae	g__Amycolatopsis	s__unclassified_g__Amycolatopsis	ASV6725	2	1.6363e-6	0.03125
d__Bacteria	k__norank_d__Bacteria	p__Actinobacteriota	c__Actinobacteria	o__Pseudonocardiales	f__Pseudonocardiaceae	g__Amycolatopsis	s__unclassified_g__Amycolatopsis	ASV6746	2	1.6363e-6	0.03125
d__Bacteria	k__norank_d__Bacteria	p__Actinobacteriota	c__Actinobacteria	o__Pseudonocardiales	f__Pseudonocardiaceae	g__Amycolatopsis	s__unclassified_g__Amycolatopsis	ASV7292	4	3.27259e-6	0.03125
d__Bacteria	k__norank_d__Bacteria	p__Actinobacteriota	c__Actinobacteria	o__Pseudonocardiales	f__Pseudonocardiaceae	g__Amycolatopsis	s__unclassified_g__Amycolatopsis	ASV7315	4	3.27259e-6	0.03125
d__Bacteria	k__norank_d__Bacteria	p__Actinobacteriota	c__Actinobacteria	o__Pseudonocardiales	f__Pseudonocardiaceae	g__Amycolatopsis	s__unclassified_g__Amycolatopsis	ASV7467	2	1.6363e-6	0.03125
d__Bacteria	k__norank_d__Bacteria	p__Actinobacteriota	c__Actinobacteria	o__Pseudonocardiales	f__Pseudonocardiaceae	g__Amycolatopsis	s__unclassified_g__Amycolatopsis	ASV7477	105	9.0E-5	0.0625
d__Bacteria	k__norank_d__Bacteria	p__Actinobacteriota	c__Actinobacteria	o__Pseudonocardiales	f__Pseudonocardiaceae	g__Amycolatopsis	s__unclassified_g__Amycolatopsis	ASV7492	20	2.0E-5	0.03125
d__Bacteria	k__norank_d__Bacteria	p__Actinobacteriota	c__Actinobacteria	o__Pseudonocardiales	f__Pseudonocardiaceae	g__Amycolatopsis	s__unclassified_g__Amycolatopsis	ASV8464	3	2.45445e-6	0.03125
d__Bacteria	k__norank_d__Bacteria	p__Actinobacteriota	c__Actinobacteria	o__Pseudonocardiales	f__Pseudonocardiaceae	g__Amycolatopsis	s__unclassified_g__Amycolatopsis	ASV8638	17	1.0E-5	0.0625
d__Bacteria	k__norank_d__Bacteria	p__Actinobacteriota	c__Actinobacteria	o__Pseudonocardiales	f__Pseudonocardiaceae	g__Amycolatopsis	s__unclassified_g__Amycolatopsis	ASV8645	13	1.0E-5	0.03125
d__Bacteria	k__norank_d__Bacteria	p__Actinobacteriota	c__Actinobacteria	o__Pseudonocardiales	f__Pseudonocardiaceae	g__Amycolatopsis	s__unclassified_g__Amycolatopsis	ASV8889	5	4.09074e-6	0.03125
d__Bacteria	k__norank_d__Bacteria	p__Actinobacteriota	c__Actinobacteria	o__Pseudonocardiales	f__Pseudonocardiaceae	g__Amycolatopsis	s__unclassified_g__Amycolatopsis	ASV8912	2	1.6363e-6	0.03125
d__Bacteria	k__norank_d__Bacteria	p__Actinobacteriota	c__Actinobacteria	o__Pseudonocardiales	f__Pseudonocardiaceae	g__Amycolatopsis	s__unclassified_g__Amycolatopsis	ASV8935	1	8.18148e-7	0.03125
d__Bacteria	k__norank_d__Bacteria	p__Actinobacteriota	c__Actinobacteria	o__Pseudonocardiales	f__Pseudonocardiaceae	g__Amycolatopsis	s__unclassified_g__Amycolatopsis	ASV8974	3	2.45445e-6	0.03125
d__Bacteria	k__norank_d__Bacteria	p__Actinobacteriota	c__Actinobacteria	o__Pseudonocardiales	f__Pseudonocardiaceae	g__Amycolatopsis	s__unclassified_g__Amycolatopsis	ASV9018	1	8.18148e-7	0.03125
d__Bacteria	k__norank_d__Bacteria	p__Actinobacteriota	c__Actinobacteria	o__Pseudonocardiales	f__Pseudonocardiaceae	g__Goodfellowiella	s__Goodfellowiella_coeruleoviolacea	ASV4515	5	4.09074e-6	0.03125
d__Bacteria	k__norank_d__Bacteria	p__Actinobacteriota	c__Actinobacteria	o__Pseudonocardiales	f__Pseudonocardiaceae	g__Kibdelosporangium	s__Kibdelosporangium_lantanae	ASV22262	13	1.0E-5	0.0625
d__Bacteria	k__norank_d__Bacteria	p__Actinobacteriota	c__Actinobacteria	o__Pseudonocardiales	f__Pseudonocardiaceae	g__Kibdelosporangium	s__unclassified_g__Kibdelosporangium	ASV440	291	0.00024	0.1875
d__Bacteria	k__norank_d__Bacteria	p__Actinobacteriota	c__Actinobacteria	o__Pseudonocardiales	f__Pseudonocardiaceae	g__Lechevalieria	s__unclassified_g__Lechevalieria	ASV1288	293	0.00024	0.53125
d__Bacteria	k__norank_d__Bacteria	p__Actinobacteriota	c__Actinobacteria	o__Pseudonocardiales	f__Pseudonocardiaceae	g__Lechevalieria	s__unclassified_g__Lechevalieria	ASV1486	4	3.27259e-6	0.03125
d__Bacteria	k__norank_d__Bacteria	p__Actinobacteriota	c__Actinobacteria	o__Pseudonocardiales	f__Pseudonocardiaceae	g__Lechevalieria	s__unclassified_g__Lechevalieria	ASV21387	9	7.36334e-6	0.03125
d__Bacteria	k__norank_d__Bacteria	p__Actinobacteriota	c__Actinobacteria	o__Pseudonocardiales	f__Pseudonocardiaceae	g__Lechevalieria	s__unclassified_g__Lechevalieria	ASV25806	5	4.09074e-6	0.03125
d__Bacteria	k__norank_d__Bacteria	p__Actinobacteriota	c__Actinobacteria	o__Pseudonocardiales	f__Pseudonocardiaceae	g__Lechevalieria	s__unclassified_g__Lechevalieria	ASV26045	7	5.72704e-6	0.03125
d__Bacteria	k__norank_d__Bacteria	p__Actinobacteriota	c__Actinobacteria	o__Pseudonocardiales	f__Pseudonocardiaceae	g__Lechevalieria	s__unclassified_g__Lechevalieria	ASV26281	1	8.18148e-7	0.03125
d__Bacteria	k__norank_d__Bacteria	p__Actinobacteriota	c__Actinobacteria	o__Pseudonocardiales	f__Pseudonocardiaceae	g__Lechevalieria	s__unclassified_g__Lechevalieria	ASV32619	3	2.45445e-6	0.03125
d__Bacteria	k__norank_d__Bacteria	p__Actinobacteriota	c__Actinobacteria	o__Pseudonocardiales	f__Pseudonocardiaceae	g__Lechevalieria	s__unclassified_g__Lechevalieria	ASV339	467	0.00038	0.65625
d__Bacteria	k__norank_d__Bacteria	p__Actinobacteriota	c__Actinobacteria	o__Pseudonocardiales	f__Pseudonocardiaceae	g__Lechevalieria	s__unclassified_g__Lechevalieria	ASV4561	6	4.90889e-6	0.03125
d__Bacteria	k__norank_d__Bacteria	p__Actinobacteriota	c__Actinobacteria	o__Pseudonocardiales	f__Pseudonocardiaceae	g__Lechevalieria	s__unclassified_g__Lechevalieria	ASV5718	4	3.27259e-6	0.03125
d__Bacteria	k__norank_d__Bacteria	p__Actinobacteriota	c__Actinobacteria	o__Pseudonocardiales	f__Pseudonocardiaceae	g__Lechevalieria	s__unclassified_g__Lechevalieria	ASV6559	42	3.0E-5	0.0625
d__Bacteria	k__norank_d__Bacteria	p__Actinobacteriota	c__Actinobacteria	o__Pseudonocardiales	f__Pseudonocardiaceae	g__Lechevalieria	s__unclassified_g__Lechevalieria	ASV7201	7	5.72704e-6	0.03125
d__Bacteria	k__norank_d__Bacteria	p__Actinobacteriota	c__Actinobacteria	o__Pseudonocardiales	f__Pseudonocardiaceae	g__Lechevalieria	s__unclassified_g__Lechevalieria	ASV8546	100	8.0E-5	0.03125
d__Bacteria	k__norank_d__Bacteria	p__Actinobacteriota	c__Actinobacteria	o__Pseudonocardiales	f__Pseudonocardiaceae	g__Lechevalieria	s__unclassified_g__Lechevalieria	ASV9016	1	8.18148e-7	0.03125
d__Bacteria	k__norank_d__Bacteria	p__Actinobacteriota	c__Actinobacteria	o__Pseudonocardiales	f__Pseudonocardiaceae	g__Longimycelium	s__uncultured_bacterium_g__Longimycelium	ASV291	33	3.0E-5	0.0625
d__Bacteria	k__norank_d__Bacteria	p__Actinobacteriota	c__Actinobacteria	o__Pseudonocardiales	f__Pseudonocardiaceae	g__Prauserella	s__Prauserella_aidingensis	ASV1051	3	2.45445e-6	0.03125
d__Bacteria	k__norank_d__Bacteria	p__Actinobacteriota	c__Actinobacteria	o__Pseudonocardiales	f__Pseudonocardiaceae	g__Pseudonocardia	s__Pseudonocardia_sp._ARG1	ASV107	462	0.00038	0.625
d__Bacteria	k__norank_d__Bacteria	p__Actinobacteriota	c__Actinobacteria	o__Pseudonocardiales	f__Pseudonocardiaceae	g__Pseudonocardia	s__unclassified_g__Pseudonocardia	ASV136	424	0.00035	0.4375
d__Bacteria	k__norank_d__Bacteria	p__Actinobacteriota	c__Actinobacteria	o__Pseudonocardiales	f__Pseudonocardiaceae	g__Pseudonocardia	s__unclassified_g__Pseudonocardia	ASV156	663	0.00054	0.625
d__Bacteria	k__norank_d__Bacteria	p__Actinobacteriota	c__Actinobacteria	o__Pseudonocardiales	f__Pseudonocardiaceae	g__Pseudonocardia	s__unclassified_g__Pseudonocardia	ASV1598	22	2.0E-5	0.03125
d__Bacteria	k__norank_d__Bacteria	p__Actinobacteriota	c__Actinobacteria	o__Pseudonocardiales	f__Pseudonocardiaceae	g__Pseudonocardia	s__unclassified_g__Pseudonocardia	ASV1660	23	2.0E-5	0.03125
d__Bacteria	k__norank_d__Bacteria	p__Actinobacteriota	c__Actinobacteria	o__Pseudonocardiales	f__Pseudonocardiaceae	g__Pseudonocardia	s__unclassified_g__Pseudonocardia	ASV1688	4	3.27259e-6	0.03125
d__Bacteria	k__norank_d__Bacteria	p__Actinobacteriota	c__Actinobacteria	o__Pseudonocardiales	f__Pseudonocardiaceae	g__Pseudonocardia	s__unclassified_g__Pseudonocardia	ASV1728	19	2.0E-5	0.0625
d__Bacteria	k__norank_d__Bacteria	p__Actinobacteriota	c__Actinobacteria	o__Pseudonocardiales	f__Pseudonocardiaceae	g__Pseudonocardia	s__unclassified_g__Pseudonocardia	ASV190	329	0.00027	0.46875
d__Bacteria	k__norank_d__Bacteria	p__Actinobacteriota	c__Actinobacteria	o__Pseudonocardiales	f__Pseudonocardiaceae	g__Pseudonocardia	s__unclassified_g__Pseudonocardia	ASV20192	1	8.18148e-7	0.03125
d__Bacteria	k__norank_d__Bacteria	p__Actinobacteriota	c__Actinobacteria	o__Pseudonocardiales	f__Pseudonocardiaceae	g__Pseudonocardia	s__unclassified_g__Pseudonocardia	ASV20241	3	2.45445e-6	0.03125
d__Bacteria	k__norank_d__Bacteria	p__Actinobacteriota	c__Actinobacteria	o__Pseudonocardiales	f__Pseudonocardiaceae	g__Pseudonocardia	s__unclassified_g__Pseudonocardia	ASV20466	1	8.18148e-7	0.03125
d__Bacteria	k__norank_d__Bacteria	p__Actinobacteriota	c__Actinobacteria	o__Pseudonocardiales	f__Pseudonocardiaceae	g__Pseudonocardia	s__unclassified_g__Pseudonocardia	ASV20742	11	8.99963e-6	0.03125
d__Bacteria	k__norank_d__Bacteria	p__Actinobacteriota	c__Actinobacteria	o__Pseudonocardiales	f__Pseudonocardiaceae	g__Pseudonocardia	s__unclassified_g__Pseudonocardia	ASV20853	12	9.81778e-6	0.0625
d__Bacteria	k__norank_d__Bacteria	p__Actinobacteriota	c__Actinobacteria	o__Pseudonocardiales	f__Pseudonocardiaceae	g__Pseudonocardia	s__unclassified_g__Pseudonocardia	ASV21020	3	2.45445e-6	0.03125
d__Bacteria	k__norank_d__Bacteria	p__Actinobacteriota	c__Actinobacteria	o__Pseudonocardiales	f__Pseudonocardiaceae	g__Pseudonocardia	s__unclassified_g__Pseudonocardia	ASV21086	1	8.18148e-7	0.03125
d__Bacteria	k__norank_d__Bacteria	p__Actinobacteriota	c__Actinobacteria	o__Pseudonocardiales	f__Pseudonocardiaceae	g__Pseudonocardia	s__unclassified_g__Pseudonocardia	ASV211	171	0.00014	0.21875
d__Bacteria	k__norank_d__Bacteria	p__Actinobacteriota	c__Actinobacteria	o__Pseudonocardiales	f__Pseudonocardiaceae	g__Pseudonocardia	s__unclassified_g__Pseudonocardia	ASV21296	32	3.0E-5	0.09375
d__Bacteria	k__norank_d__Bacteria	p__Actinobacteriota	c__Actinobacteria	o__Pseudonocardiales	f__Pseudonocardiaceae	g__Pseudonocardia	s__unclassified_g__Pseudonocardia	ASV214	442	0.00036	0.53125
d__Bacteria	k__norank_d__Bacteria	p__Actinobacteriota	c__Actinobacteria	o__Pseudonocardiales	f__Pseudonocardiaceae	g__Pseudonocardia	s__unclassified_g__Pseudonocardia	ASV21626	3	2.45445e-6	0.03125
d__Bacteria	k__norank_d__Bacteria	p__Actinobacteriota	c__Actinobacteria	o__Pseudonocardiales	f__Pseudonocardiaceae	g__Pseudonocardia	s__unclassified_g__Pseudonocardia	ASV21644	3	2.45445e-6	0.03125
d__Bacteria	k__norank_d__Bacteria	p__Actinobacteriota	c__Actinobacteria	o__Pseudonocardiales	f__Pseudonocardiaceae	g__Pseudonocardia	s__unclassified_g__Pseudonocardia	ASV22257	11	8.99963e-6	0.03125
d__Bacteria	k__norank_d__Bacteria	p__Actinobacteriota	c__Actinobacteria	o__Pseudonocardiales	f__Pseudonocardiaceae	g__Pseudonocardia	s__unclassified_g__Pseudonocardia	ASV22270	14	1.0E-5	0.03125
d__Bacteria	k__norank_d__Bacteria	p__Actinobacteriota	c__Actinobacteria	o__Pseudonocardiales	f__Pseudonocardiaceae	g__Pseudonocardia	s__unclassified_g__Pseudonocardia	ASV22351	8	6.54519e-6	0.03125
d__Bacteria	k__norank_d__Bacteria	p__Actinobacteriota	c__Actinobacteria	o__Pseudonocardiales	f__Pseudonocardiaceae	g__Pseudonocardia	s__unclassified_g__Pseudonocardia	ASV22385	8	6.54519e-6	0.03125
d__Bacteria	k__norank_d__Bacteria	p__Actinobacteriota	c__Actinobacteria	o__Pseudonocardiales	f__Pseudonocardiaceae	g__Pseudonocardia	s__unclassified_g__Pseudonocardia	ASV22531	5	4.09074e-6	0.03125
d__Bacteria	k__norank_d__Bacteria	p__Actinobacteriota	c__Actinobacteria	o__Pseudonocardiales	f__Pseudonocardiaceae	g__Pseudonocardia	s__unclassified_g__Pseudonocardia	ASV22757	1	8.18148e-7	0.03125
d__Bacteria	k__norank_d__Bacteria	p__Actinobacteriota	c__Actinobacteria	o__Pseudonocardiales	f__Pseudonocardiaceae	g__Pseudonocardia	s__unclassified_g__Pseudonocardia	ASV22794	2	1.6363e-6	0.03125
d__Bacteria	k__norank_d__Bacteria	p__Actinobacteriota	c__Actinobacteria	o__Pseudonocardiales	f__Pseudonocardiaceae	g__Pseudonocardia	s__unclassified_g__Pseudonocardia	ASV23254	13	1.0E-5	0.03125
d__Bacteria	k__norank_d__Bacteria	p__Actinobacteriota	c__Actinobacteria	o__Pseudonocardiales	f__Pseudonocardiaceae	g__Pseudonocardia	s__unclassified_g__Pseudonocardia	ASV23393	4	3.27259e-6	0.03125
d__Bacteria	k__norank_d__Bacteria	p__Actinobacteriota	c__Actinobacteria	o__Pseudonocardiales	f__Pseudonocardiaceae	g__Pseudonocardia	s__unclassified_g__Pseudonocardia	ASV2350	26	2.0E-5	0.0625
d__Bacteria	k__norank_d__Bacteria	p__Actinobacteriota	c__Actinobacteria	o__Pseudonocardiales	f__Pseudonocardiaceae	g__Pseudonocardia	s__unclassified_g__Pseudonocardia	ASV23930	29	2.0E-5	0.03125
d__Bacteria	k__norank_d__Bacteria	p__Actinobacteriota	c__Actinobacteria	o__Pseudonocardiales	f__Pseudonocardiaceae	g__Pseudonocardia	s__unclassified_g__Pseudonocardia	ASV248	23	2.0E-5	0.03125
d__Bacteria	k__norank_d__Bacteria	p__Actinobacteriota	c__Actinobacteria	o__Pseudonocardiales	f__Pseudonocardiaceae	g__Pseudonocardia	s__unclassified_g__Pseudonocardia	ASV25827	5	4.09074e-6	0.03125
d__Bacteria	k__norank_d__Bacteria	p__Actinobacteriota	c__Actinobacteria	o__Pseudonocardiales	f__Pseudonocardiaceae	g__Pseudonocardia	s__unclassified_g__Pseudonocardia	ASV26057	4	3.27259e-6	0.03125
d__Bacteria	k__norank_d__Bacteria	p__Actinobacteriota	c__Actinobacteria	o__Pseudonocardiales	f__Pseudonocardiaceae	g__Pseudonocardia	s__unclassified_g__Pseudonocardia	ASV26071	5	4.09074e-6	0.03125
d__Bacteria	k__norank_d__Bacteria	p__Actinobacteriota	c__Actinobacteria	o__Pseudonocardiales	f__Pseudonocardiaceae	g__Pseudonocardia	s__unclassified_g__Pseudonocardia	ASV26178	3	2.45445e-6	0.03125
d__Bacteria	k__norank_d__Bacteria	p__Actinobacteriota	c__Actinobacteria	o__Pseudonocardiales	f__Pseudonocardiaceae	g__Pseudonocardia	s__unclassified_g__Pseudonocardia	ASV26311	1	8.18148e-7	0.03125
d__Bacteria	k__norank_d__Bacteria	p__Actinobacteriota	c__Actinobacteria	o__Pseudonocardiales	f__Pseudonocardiaceae	g__Pseudonocardia	s__unclassified_g__Pseudonocardia	ASV26313	3	2.45445e-6	0.03125
d__Bacteria	k__norank_d__Bacteria	p__Actinobacteriota	c__Actinobacteria	o__Pseudonocardiales	f__Pseudonocardiaceae	g__Pseudonocardia	s__unclassified_g__Pseudonocardia	ASV26370	1	8.18148e-7	0.03125
d__Bacteria	k__norank_d__Bacteria	p__Actinobacteriota	c__Actinobacteria	o__Pseudonocardiales	f__Pseudonocardiaceae	g__Pseudonocardia	s__unclassified_g__Pseudonocardia	ASV26441	19	2.0E-5	0.03125
d__Bacteria	k__norank_d__Bacteria	p__Actinobacteriota	c__Actinobacteria	o__Pseudonocardiales	f__Pseudonocardiaceae	g__Pseudonocardia	s__unclassified_g__Pseudonocardia	ASV26500	10	8.18148e-6	0.03125
d__Bacteria	k__norank_d__Bacteria	p__Actinobacteriota	c__Actinobacteria	o__Pseudonocardiales	f__Pseudonocardiaceae	g__Pseudonocardia	s__unclassified_g__Pseudonocardia	ASV26583	6	4.90889e-6	0.03125
d__Bacteria	k__norank_d__Bacteria	p__Actinobacteriota	c__Actinobacteria	o__Pseudonocardiales	f__Pseudonocardiaceae	g__Pseudonocardia	s__unclassified_g__Pseudonocardia	ASV26848	3	2.45445e-6	0.03125
d__Bacteria	k__norank_d__Bacteria	p__Actinobacteriota	c__Actinobacteria	o__Pseudonocardiales	f__Pseudonocardiaceae	g__Pseudonocardia	s__unclassified_g__Pseudonocardia	ASV26998	2	1.6363e-6	0.03125
d__Bacteria	k__norank_d__Bacteria	p__Actinobacteriota	c__Actinobacteria	o__Pseudonocardiales	f__Pseudonocardiaceae	g__Pseudonocardia	s__unclassified_g__Pseudonocardia	ASV27206	1	8.18148e-7	0.03125
d__Bacteria	k__norank_d__Bacteria	p__Actinobacteriota	c__Actinobacteria	o__Pseudonocardiales	f__Pseudonocardiaceae	g__Pseudonocardia	s__unclassified_g__Pseudonocardia	ASV28	1115	0.00091	0.625
d__Bacteria	k__norank_d__Bacteria	p__Actinobacteriota	c__Actinobacteria	o__Pseudonocardiales	f__Pseudonocardiaceae	g__Pseudonocardia	s__unclassified_g__Pseudonocardia	ASV28290	9	7.36334e-6	0.03125
d__Bacteria	k__norank_d__Bacteria	p__Actinobacteriota	c__Actinobacteria	o__Pseudonocardiales	f__Pseudonocardiaceae	g__Pseudonocardia	s__unclassified_g__Pseudonocardia	ASV29350	2	1.6363e-6	0.03125
d__Bacteria	k__norank_d__Bacteria	p__Actinobacteriota	c__Actinobacteria	o__Pseudonocardiales	f__Pseudonocardiaceae	g__Pseudonocardia	s__unclassified_g__Pseudonocardia	ASV29412	15	1.0E-5	0.03125
d__Bacteria	k__norank_d__Bacteria	p__Actinobacteriota	c__Actinobacteria	o__Pseudonocardiales	f__Pseudonocardiaceae	g__Pseudonocardia	s__unclassified_g__Pseudonocardia	ASV29422	10	8.18148e-6	0.03125
d__Bacteria	k__norank_d__Bacteria	p__Actinobacteriota	c__Actinobacteria	o__Pseudonocardiales	f__Pseudonocardiaceae	g__Pseudonocardia	s__unclassified_g__Pseudonocardia	ASV29474	6	4.90889e-6	0.03125
d__Bacteria	k__norank_d__Bacteria	p__Actinobacteriota	c__Actinobacteria	o__Pseudonocardiales	f__Pseudonocardiaceae	g__Pseudonocardia	s__unclassified_g__Pseudonocardia	ASV29565	8	6.54519e-6	0.03125
d__Bacteria	k__norank_d__Bacteria	p__Actinobacteriota	c__Actinobacteria	o__Pseudonocardiales	f__Pseudonocardiaceae	g__Pseudonocardia	s__unclassified_g__Pseudonocardia	ASV29690	4	3.27259e-6	0.03125
d__Bacteria	k__norank_d__Bacteria	p__Actinobacteriota	c__Actinobacteria	o__Pseudonocardiales	f__Pseudonocardiaceae	g__Pseudonocardia	s__unclassified_g__Pseudonocardia	ASV2972	25	2.0E-5	0.0625
d__Bacteria	k__norank_d__Bacteria	p__Actinobacteriota	c__Actinobacteria	o__Pseudonocardiales	f__Pseudonocardiaceae	g__Pseudonocardia	s__unclassified_g__Pseudonocardia	ASV2973	265	0.00022	0.375
d__Bacteria	k__norank_d__Bacteria	p__Actinobacteriota	c__Actinobacteria	o__Pseudonocardiales	f__Pseudonocardiaceae	g__Pseudonocardia	s__unclassified_g__Pseudonocardia	ASV29787	1	8.18148e-7	0.03125
d__Bacteria	k__norank_d__Bacteria	p__Actinobacteriota	c__Actinobacteria	o__Pseudonocardiales	f__Pseudonocardiaceae	g__Pseudonocardia	s__unclassified_g__Pseudonocardia	ASV3066	145	0.00012	0.125
d__Bacteria	k__norank_d__Bacteria	p__Actinobacteriota	c__Actinobacteria	o__Pseudonocardiales	f__Pseudonocardiaceae	g__Pseudonocardia	s__unclassified_g__Pseudonocardia	ASV3204	9	7.36334e-6	0.03125
d__Bacteria	k__norank_d__Bacteria	p__Actinobacteriota	c__Actinobacteria	o__Pseudonocardiales	f__Pseudonocardiaceae	g__Pseudonocardia	s__unclassified_g__Pseudonocardia	ASV3205	80	7.0E-5	0.125
d__Bacteria	k__norank_d__Bacteria	p__Actinobacteriota	c__Actinobacteria	o__Pseudonocardiales	f__Pseudonocardiaceae	g__Pseudonocardia	s__unclassified_g__Pseudonocardia	ASV3243	73	6.0E-5	0.1875
d__Bacteria	k__norank_d__Bacteria	p__Actinobacteriota	c__Actinobacteria	o__Pseudonocardiales	f__Pseudonocardiaceae	g__Pseudonocardia	s__unclassified_g__Pseudonocardia	ASV32526	5	4.09074e-6	0.03125
d__Bacteria	k__norank_d__Bacteria	p__Actinobacteriota	c__Actinobacteria	o__Pseudonocardiales	f__Pseudonocardiaceae	g__Pseudonocardia	s__unclassified_g__Pseudonocardia	ASV32568	3	2.45445e-6	0.03125
d__Bacteria	k__norank_d__Bacteria	p__Actinobacteriota	c__Actinobacteria	o__Pseudonocardiales	f__Pseudonocardiaceae	g__Pseudonocardia	s__unclassified_g__Pseudonocardia	ASV3277	65	5.0E-5	0.125
d__Bacteria	k__norank_d__Bacteria	p__Actinobacteriota	c__Actinobacteria	o__Pseudonocardiales	f__Pseudonocardiaceae	g__Pseudonocardia	s__unclassified_g__Pseudonocardia	ASV3325	72	6.0E-5	0.1875
d__Bacteria	k__norank_d__Bacteria	p__Actinobacteriota	c__Actinobacteria	o__Pseudonocardiales	f__Pseudonocardiaceae	g__Pseudonocardia	s__unclassified_g__Pseudonocardia	ASV3331	18	1.0E-5	0.0625
d__Bacteria	k__norank_d__Bacteria	p__Actinobacteriota	c__Actinobacteria	o__Pseudonocardiales	f__Pseudonocardiaceae	g__Pseudonocardia	s__unclassified_g__Pseudonocardia	ASV334	52	4.0E-5	0.125
d__Bacteria	k__norank_d__Bacteria	p__Actinobacteriota	c__Actinobacteria	o__Pseudonocardiales	f__Pseudonocardiaceae	g__Pseudonocardia	s__unclassified_g__Pseudonocardia	ASV335	23	2.0E-5	0.0625
d__Bacteria	k__norank_d__Bacteria	p__Actinobacteriota	c__Actinobacteria	o__Pseudonocardiales	f__Pseudonocardiaceae	g__Pseudonocardia	s__unclassified_g__Pseudonocardia	ASV350	119	0.0001	0.1875
d__Bacteria	k__norank_d__Bacteria	p__Actinobacteriota	c__Actinobacteria	o__Pseudonocardiales	f__Pseudonocardiaceae	g__Pseudonocardia	s__unclassified_g__Pseudonocardia	ASV402	13	1.0E-5	0.03125
d__Bacteria	k__norank_d__Bacteria	p__Actinobacteriota	c__Actinobacteria	o__Pseudonocardiales	f__Pseudonocardiaceae	g__Pseudonocardia	s__unclassified_g__Pseudonocardia	ASV4363	43	4.0E-5	0.0625
d__Bacteria	k__norank_d__Bacteria	p__Actinobacteriota	c__Actinobacteria	o__Pseudonocardiales	f__Pseudonocardiaceae	g__Pseudonocardia	s__unclassified_g__Pseudonocardia	ASV4394	23	2.0E-5	0.0625
d__Bacteria	k__norank_d__Bacteria	p__Actinobacteriota	c__Actinobacteria	o__Pseudonocardiales	f__Pseudonocardiaceae	g__Pseudonocardia	s__unclassified_g__Pseudonocardia	ASV4426	37	3.0E-5	0.15625
d__Bacteria	k__norank_d__Bacteria	p__Actinobacteriota	c__Actinobacteria	o__Pseudonocardiales	f__Pseudonocardiaceae	g__Pseudonocardia	s__unclassified_g__Pseudonocardia	ASV4428	6	4.90889e-6	0.03125
d__Bacteria	k__norank_d__Bacteria	p__Actinobacteriota	c__Actinobacteria	o__Pseudonocardiales	f__Pseudonocardiaceae	g__Pseudonocardia	s__unclassified_g__Pseudonocardia	ASV4498	49	4.0E-5	0.15625
d__Bacteria	k__norank_d__Bacteria	p__Actinobacteriota	c__Actinobacteria	o__Pseudonocardiales	f__Pseudonocardiaceae	g__Pseudonocardia	s__unclassified_g__Pseudonocardia	ASV4509	6	4.90889e-6	0.03125
d__Bacteria	k__norank_d__Bacteria	p__Actinobacteriota	c__Actinobacteria	o__Pseudonocardiales	f__Pseudonocardiaceae	g__Pseudonocardia	s__unclassified_g__Pseudonocardia	ASV466	12	9.81778e-6	0.03125
d__Bacteria	k__norank_d__Bacteria	p__Actinobacteriota	c__Actinobacteria	o__Pseudonocardiales	f__Pseudonocardiaceae	g__Pseudonocardia	s__unclassified_g__Pseudonocardia	ASV4660	8	6.54519e-6	0.0625
d__Bacteria	k__norank_d__Bacteria	p__Actinobacteriota	c__Actinobacteria	o__Pseudonocardiales	f__Pseudonocardiaceae	g__Pseudonocardia	s__unclassified_g__Pseudonocardia	ASV4681	5	4.09074e-6	0.03125
d__Bacteria	k__norank_d__Bacteria	p__Actinobacteriota	c__Actinobacteria	o__Pseudonocardiales	f__Pseudonocardiaceae	g__Pseudonocardia	s__unclassified_g__Pseudonocardia	ASV4693	5	4.09074e-6	0.03125
d__Bacteria	k__norank_d__Bacteria	p__Actinobacteriota	c__Actinobacteria	o__Pseudonocardiales	f__Pseudonocardiaceae	g__Pseudonocardia	s__unclassified_g__Pseudonocardia	ASV4695	13	1.0E-5	0.0625
d__Bacteria	k__norank_d__Bacteria	p__Actinobacteriota	c__Actinobacteria	o__Pseudonocardiales	f__Pseudonocardiaceae	g__Pseudonocardia	s__unclassified_g__Pseudonocardia	ASV4854	2	1.6363e-6	0.03125
d__Bacteria	k__norank_d__Bacteria	p__Actinobacteriota	c__Actinobacteria	o__Pseudonocardiales	f__Pseudonocardiaceae	g__Pseudonocardia	s__unclassified_g__Pseudonocardia	ASV54	243	0.0002	0.125
d__Bacteria	k__norank_d__Bacteria	p__Actinobacteriota	c__Actinobacteria	o__Pseudonocardiales	f__Pseudonocardiaceae	g__Pseudonocardia	s__unclassified_g__Pseudonocardia	ASV5596	73	6.0E-5	0.09375
d__Bacteria	k__norank_d__Bacteria	p__Actinobacteriota	c__Actinobacteria	o__Pseudonocardiales	f__Pseudonocardiaceae	g__Pseudonocardia	s__unclassified_g__Pseudonocardia	ASV5616	61	5.0E-5	0.125
d__Bacteria	k__norank_d__Bacteria	p__Actinobacteriota	c__Actinobacteria	o__Pseudonocardiales	f__Pseudonocardiaceae	g__Pseudonocardia	s__unclassified_g__Pseudonocardia	ASV5804	2	1.6363e-6	0.03125
d__Bacteria	k__norank_d__Bacteria	p__Actinobacteriota	c__Actinobacteria	o__Pseudonocardiales	f__Pseudonocardiaceae	g__Pseudonocardia	s__unclassified_g__Pseudonocardia	ASV592	7	5.72704e-6	0.03125
d__Bacteria	k__norank_d__Bacteria	p__Actinobacteriota	c__Actinobacteria	o__Pseudonocardiales	f__Pseudonocardiaceae	g__Pseudonocardia	s__unclassified_g__Pseudonocardia	ASV6085	7	5.72704e-6	0.03125
d__Bacteria	k__norank_d__Bacteria	p__Actinobacteriota	c__Actinobacteria	o__Pseudonocardiales	f__Pseudonocardiaceae	g__Pseudonocardia	s__unclassified_g__Pseudonocardia	ASV6607	8	6.54519e-6	0.03125
d__Bacteria	k__norank_d__Bacteria	p__Actinobacteriota	c__Actinobacteria	o__Pseudonocardiales	f__Pseudonocardiaceae	g__Pseudonocardia	s__unclassified_g__Pseudonocardia	ASV663	8	6.54519e-6	0.03125
d__Bacteria	k__norank_d__Bacteria	p__Actinobacteriota	c__Actinobacteria	o__Pseudonocardiales	f__Pseudonocardiaceae	g__Pseudonocardia	s__unclassified_g__Pseudonocardia	ASV7177	7	5.72704e-6	0.03125
d__Bacteria	k__norank_d__Bacteria	p__Actinobacteriota	c__Actinobacteria	o__Pseudonocardiales	f__Pseudonocardiaceae	g__Pseudonocardia	s__unclassified_g__Pseudonocardia	ASV7199	7	5.72704e-6	0.03125
d__Bacteria	k__norank_d__Bacteria	p__Actinobacteriota	c__Actinobacteria	o__Pseudonocardiales	f__Pseudonocardiaceae	g__Pseudonocardia	s__unclassified_g__Pseudonocardia	ASV7227	6	4.90889e-6	0.03125
d__Bacteria	k__norank_d__Bacteria	p__Actinobacteriota	c__Actinobacteria	o__Pseudonocardiales	f__Pseudonocardiaceae	g__Pseudonocardia	s__unclassified_g__Pseudonocardia	ASV7295	4	3.27259e-6	0.03125
d__Bacteria	k__norank_d__Bacteria	p__Actinobacteriota	c__Actinobacteria	o__Pseudonocardiales	f__Pseudonocardiaceae	g__Pseudonocardia	s__unclassified_g__Pseudonocardia	ASV7413	2	1.6363e-6	0.03125
d__Bacteria	k__norank_d__Bacteria	p__Actinobacteriota	c__Actinobacteria	o__Pseudonocardiales	f__Pseudonocardiaceae	g__Pseudonocardia	s__unclassified_g__Pseudonocardia	ASV7438	2	1.6363e-6	0.03125
d__Bacteria	k__norank_d__Bacteria	p__Actinobacteriota	c__Actinobacteria	o__Pseudonocardiales	f__Pseudonocardiaceae	g__Pseudonocardia	s__unclassified_g__Pseudonocardia	ASV7514	106	9.0E-5	0.15625
d__Bacteria	k__norank_d__Bacteria	p__Actinobacteriota	c__Actinobacteria	o__Pseudonocardiales	f__Pseudonocardiaceae	g__Pseudonocardia	s__unclassified_g__Pseudonocardia	ASV788	6	4.90889e-6	0.03125
d__Bacteria	k__norank_d__Bacteria	p__Actinobacteriota	c__Actinobacteria	o__Pseudonocardiales	f__Pseudonocardiaceae	g__Pseudonocardia	s__unclassified_g__Pseudonocardia	ASV8304	16	1.0E-5	0.03125
d__Bacteria	k__norank_d__Bacteria	p__Actinobacteriota	c__Actinobacteria	o__Pseudonocardiales	f__Pseudonocardiaceae	g__Pseudonocardia	s__unclassified_g__Pseudonocardia	ASV8333	10	8.18148e-6	0.03125
d__Bacteria	k__norank_d__Bacteria	p__Actinobacteriota	c__Actinobacteria	o__Pseudonocardiales	f__Pseudonocardiaceae	g__Pseudonocardia	s__unclassified_g__Pseudonocardia	ASV8525	2	1.6363e-6	0.03125
d__Bacteria	k__norank_d__Bacteria	p__Actinobacteriota	c__Actinobacteria	o__Pseudonocardiales	f__Pseudonocardiaceae	g__Pseudonocardia	s__unclassified_g__Pseudonocardia	ASV8545	98	8.0E-5	0.03125
d__Bacteria	k__norank_d__Bacteria	p__Actinobacteriota	c__Actinobacteria	o__Pseudonocardiales	f__Pseudonocardiaceae	g__Pseudonocardia	s__unclassified_g__Pseudonocardia	ASV8666	9	7.36334e-6	0.03125
d__Bacteria	k__norank_d__Bacteria	p__Actinobacteriota	c__Actinobacteria	o__Pseudonocardiales	f__Pseudonocardiaceae	g__Pseudonocardia	s__unclassified_g__Pseudonocardia	ASV8737	7	5.72704e-6	0.03125
d__Bacteria	k__norank_d__Bacteria	p__Actinobacteriota	c__Actinobacteria	o__Pseudonocardiales	f__Pseudonocardiaceae	g__Pseudonocardia	s__unclassified_g__Pseudonocardia	ASV8770	5	4.09074e-6	0.03125
d__Bacteria	k__norank_d__Bacteria	p__Actinobacteriota	c__Actinobacteria	o__Pseudonocardiales	f__Pseudonocardiaceae	g__Pseudonocardia	s__unclassified_g__Pseudonocardia	ASV8819	4	3.27259e-6	0.03125
d__Bacteria	k__norank_d__Bacteria	p__Actinobacteriota	c__Actinobacteria	o__Pseudonocardiales	f__Pseudonocardiaceae	g__Pseudonocardia	s__unclassified_g__Pseudonocardia	ASV9211	27	2.0E-5	0.0625
d__Bacteria	k__norank_d__Bacteria	p__Actinobacteriota	c__Actinobacteria	o__Pseudonocardiales	f__Pseudonocardiaceae	g__Pseudonocardia	s__unclassified_g__Pseudonocardia	ASV925	5	4.09074e-6	0.03125
d__Bacteria	k__norank_d__Bacteria	p__Actinobacteriota	c__Actinobacteria	o__Pseudonocardiales	f__Pseudonocardiaceae	g__Pseudonocardia	s__unclassified_g__Pseudonocardia	ASV93	109	9.0E-5	0.125
d__Bacteria	k__norank_d__Bacteria	p__Actinobacteriota	c__Actinobacteria	o__Pseudonocardiales	f__Pseudonocardiaceae	g__Saccharomonospora	s__unclassified_g__Saccharomonospora	ASV26935	3	2.45445e-6	0.03125
d__Bacteria	k__norank_d__Bacteria	p__Actinobacteriota	c__Actinobacteria	o__Pseudonocardiales	f__Pseudonocardiaceae	g__Saccharopolyspora	s__Saccharopolyspora_hordei	ASV26809	3	2.45445e-6	0.03125
d__Bacteria	k__norank_d__Bacteria	p__Actinobacteriota	c__Actinobacteria	o__Pseudonocardiales	f__Pseudonocardiaceae	g__Saccharopolyspora	s__unclassified_g__Saccharopolyspora	ASV1586	12	9.81778e-6	0.03125
d__Bacteria	k__norank_d__Bacteria	p__Actinobacteriota	c__Actinobacteria	o__Pseudonocardiales	f__Pseudonocardiaceae	g__Saccharopolyspora	s__unclassified_g__Saccharopolyspora	ASV29400	21	2.0E-5	0.03125
d__Bacteria	k__norank_d__Bacteria	p__Actinobacteriota	c__Actinobacteria	o__Pseudonocardiales	f__Pseudonocardiaceae	g__Saccharopolyspora	s__unclassified_g__Saccharopolyspora	ASV29834	3	2.45445e-6	0.03125
d__Bacteria	k__norank_d__Bacteria	p__Actinobacteriota	c__Actinobacteria	o__Pseudonocardiales	f__Pseudonocardiaceae	g__Saccharopolyspora	s__unclassified_g__Saccharopolyspora	ASV4404	77	6.0E-5	0.1875
d__Bacteria	k__norank_d__Bacteria	p__Actinobacteriota	c__Actinobacteria	o__Pseudonocardiales	f__Pseudonocardiaceae	g__Saccharopolyspora	s__unclassified_g__Saccharopolyspora	ASV627	7	5.72704e-6	0.03125
d__Bacteria	k__norank_d__Bacteria	p__Actinobacteriota	c__Actinobacteria	o__Pseudonocardiales	f__Pseudonocardiaceae	g__Saccharopolyspora	s__unclassified_g__Saccharopolyspora	ASV7150	197	0.00016	0.15625
d__Bacteria	k__norank_d__Bacteria	p__Actinobacteriota	c__Actinobacteria	o__Pseudonocardiales	f__Pseudonocardiaceae	g__Saccharopolyspora	s__unclassified_g__Saccharopolyspora	ASV762	71	6.0E-5	0.1875
d__Bacteria	k__norank_d__Bacteria	p__Actinobacteriota	c__Actinobacteria	o__Pseudonocardiales	f__Pseudonocardiaceae	g__Saccharothrix	s__unclassified_g__Saccharothrix	ASV1244	200	0.00016	0.21875
d__Bacteria	k__norank_d__Bacteria	p__Actinobacteriota	c__Actinobacteria	o__Pseudonocardiales	f__Pseudonocardiaceae	g__Saccharothrix	s__unclassified_g__Saccharothrix	ASV1422	27	2.0E-5	0.125
d__Bacteria	k__norank_d__Bacteria	p__Actinobacteriota	c__Actinobacteria	o__Pseudonocardiales	f__Pseudonocardiaceae	g__Saccharothrix	s__unclassified_g__Saccharothrix	ASV21667	3	2.45445e-6	0.03125
d__Bacteria	k__norank_d__Bacteria	p__Actinobacteriota	c__Actinobacteria	o__Pseudonocardiales	f__Pseudonocardiaceae	g__norank_f__Pseudonocardiaceae	s__Amycolatopsis_sp.	ASV7469	20	2.0E-5	0.03125
d__Bacteria	k__norank_d__Bacteria	p__Actinobacteriota	c__Actinobacteria	o__Pseudonocardiales	f__Pseudonocardiaceae	g__unclassified_f__Pseudonocardiaceae	s__unclassified_f__Pseudonocardiaceae	ASV1005	4	3.27259e-6	0.03125
d__Bacteria	k__norank_d__Bacteria	p__Actinobacteriota	c__Actinobacteria	o__Pseudonocardiales	f__Pseudonocardiaceae	g__unclassified_f__Pseudonocardiaceae	s__unclassified_f__Pseudonocardiaceae	ASV1018	2	1.6363e-6	0.03125
d__Bacteria	k__norank_d__Bacteria	p__Actinobacteriota	c__Actinobacteria	o__Pseudonocardiales	f__Pseudonocardiaceae	g__unclassified_f__Pseudonocardiaceae	s__unclassified_f__Pseudonocardiaceae	ASV1086	3	2.45445e-6	0.03125
d__Bacteria	k__norank_d__Bacteria	p__Actinobacteriota	c__Actinobacteria	o__Pseudonocardiales	f__Pseudonocardiaceae	g__unclassified_f__Pseudonocardiaceae	s__unclassified_f__Pseudonocardiaceae	ASV1542	314	0.00026	0.25
d__Bacteria	k__norank_d__Bacteria	p__Actinobacteriota	c__Actinobacteria	o__Pseudonocardiales	f__Pseudonocardiaceae	g__unclassified_f__Pseudonocardiaceae	s__unclassified_f__Pseudonocardiaceae	ASV196	242	0.0002	0.3125
d__Bacteria	k__norank_d__Bacteria	p__Actinobacteriota	c__Actinobacteria	o__Pseudonocardiales	f__Pseudonocardiaceae	g__unclassified_f__Pseudonocardiaceae	s__unclassified_f__Pseudonocardiaceae	ASV20276	2	1.6363e-6	0.03125
d__Bacteria	k__norank_d__Bacteria	p__Actinobacteriota	c__Actinobacteria	o__Pseudonocardiales	f__Pseudonocardiaceae	g__unclassified_f__Pseudonocardiaceae	s__unclassified_f__Pseudonocardiaceae	ASV20337	1	8.18148e-7	0.03125
d__Bacteria	k__norank_d__Bacteria	p__Actinobacteriota	c__Actinobacteria	o__Pseudonocardiales	f__Pseudonocardiaceae	g__unclassified_f__Pseudonocardiaceae	s__unclassified_f__Pseudonocardiaceae	ASV20416	1	8.18148e-7	0.03125
d__Bacteria	k__norank_d__Bacteria	p__Actinobacteriota	c__Actinobacteria	o__Pseudonocardiales	f__Pseudonocardiaceae	g__unclassified_f__Pseudonocardiaceae	s__unclassified_f__Pseudonocardiaceae	ASV21332	8	6.54519e-6	0.03125
d__Bacteria	k__norank_d__Bacteria	p__Actinobacteriota	c__Actinobacteria	o__Pseudonocardiales	f__Pseudonocardiaceae	g__unclassified_f__Pseudonocardiaceae	s__unclassified_f__Pseudonocardiaceae	ASV21472	3	2.45445e-6	0.03125
d__Bacteria	k__norank_d__Bacteria	p__Actinobacteriota	c__Actinobacteria	o__Pseudonocardiales	f__Pseudonocardiaceae	g__unclassified_f__Pseudonocardiaceae	s__unclassified_f__Pseudonocardiaceae	ASV21668	3	2.45445e-6	0.03125
d__Bacteria	k__norank_d__Bacteria	p__Actinobacteriota	c__Actinobacteria	o__Pseudonocardiales	f__Pseudonocardiaceae	g__unclassified_f__Pseudonocardiaceae	s__unclassified_f__Pseudonocardiaceae	ASV21741	3	2.45445e-6	0.03125
d__Bacteria	k__norank_d__Bacteria	p__Actinobacteriota	c__Actinobacteria	o__Pseudonocardiales	f__Pseudonocardiaceae	g__unclassified_f__Pseudonocardiaceae	s__unclassified_f__Pseudonocardiaceae	ASV21862	2	1.6363e-6	0.03125
d__Bacteria	k__norank_d__Bacteria	p__Actinobacteriota	c__Actinobacteria	o__Pseudonocardiales	f__Pseudonocardiaceae	g__unclassified_f__Pseudonocardiaceae	s__unclassified_f__Pseudonocardiaceae	ASV22198	23	2.0E-5	0.03125
d__Bacteria	k__norank_d__Bacteria	p__Actinobacteriota	c__Actinobacteria	o__Pseudonocardiales	f__Pseudonocardiaceae	g__unclassified_f__Pseudonocardiaceae	s__unclassified_f__Pseudonocardiaceae	ASV22544	2	1.6363e-6	0.03125
d__Bacteria	k__norank_d__Bacteria	p__Actinobacteriota	c__Actinobacteria	o__Pseudonocardiales	f__Pseudonocardiaceae	g__unclassified_f__Pseudonocardiaceae	s__unclassified_f__Pseudonocardiaceae	ASV22840	1	8.18148e-7	0.03125
d__Bacteria	k__norank_d__Bacteria	p__Actinobacteriota	c__Actinobacteria	o__Pseudonocardiales	f__Pseudonocardiaceae	g__unclassified_f__Pseudonocardiaceae	s__unclassified_f__Pseudonocardiaceae	ASV22842	1	8.18148e-7	0.03125
d__Bacteria	k__norank_d__Bacteria	p__Actinobacteriota	c__Actinobacteria	o__Pseudonocardiales	f__Pseudonocardiaceae	g__unclassified_f__Pseudonocardiaceae	s__unclassified_f__Pseudonocardiaceae	ASV22884	2	1.6363e-6	0.03125
d__Bacteria	k__norank_d__Bacteria	p__Actinobacteriota	c__Actinobacteria	o__Pseudonocardiales	f__Pseudonocardiaceae	g__unclassified_f__Pseudonocardiaceae	s__unclassified_f__Pseudonocardiaceae	ASV23452	5	4.09074e-6	0.03125
d__Bacteria	k__norank_d__Bacteria	p__Actinobacteriota	c__Actinobacteria	o__Pseudonocardiales	f__Pseudonocardiaceae	g__unclassified_f__Pseudonocardiaceae	s__unclassified_f__Pseudonocardiaceae	ASV26108	5	4.09074e-6	0.03125
d__Bacteria	k__norank_d__Bacteria	p__Actinobacteriota	c__Actinobacteria	o__Pseudonocardiales	f__Pseudonocardiaceae	g__unclassified_f__Pseudonocardiaceae	s__unclassified_f__Pseudonocardiaceae	ASV26415	2	1.6363e-6	0.03125
d__Bacteria	k__norank_d__Bacteria	p__Actinobacteriota	c__Actinobacteria	o__Pseudonocardiales	f__Pseudonocardiaceae	g__unclassified_f__Pseudonocardiaceae	s__unclassified_f__Pseudonocardiaceae	ASV26590	7	5.72704e-6	0.03125
d__Bacteria	k__norank_d__Bacteria	p__Actinobacteriota	c__Actinobacteria	o__Pseudonocardiales	f__Pseudonocardiaceae	g__unclassified_f__Pseudonocardiaceae	s__unclassified_f__Pseudonocardiaceae	ASV26871	1	8.18148e-7	0.03125
d__Bacteria	k__norank_d__Bacteria	p__Actinobacteriota	c__Actinobacteria	o__Pseudonocardiales	f__Pseudonocardiaceae	g__unclassified_f__Pseudonocardiaceae	s__unclassified_f__Pseudonocardiaceae	ASV26980	3	2.45445e-6	0.03125
d__Bacteria	k__norank_d__Bacteria	p__Actinobacteriota	c__Actinobacteria	o__Pseudonocardiales	f__Pseudonocardiaceae	g__unclassified_f__Pseudonocardiaceae	s__unclassified_f__Pseudonocardiaceae	ASV27194	1	8.18148e-7	0.03125
d__Bacteria	k__norank_d__Bacteria	p__Actinobacteriota	c__Actinobacteria	o__Pseudonocardiales	f__Pseudonocardiaceae	g__unclassified_f__Pseudonocardiaceae	s__unclassified_f__Pseudonocardiaceae	ASV27228	2	1.6363e-6	0.03125
d__Bacteria	k__norank_d__Bacteria	p__Actinobacteriota	c__Actinobacteria	o__Pseudonocardiales	f__Pseudonocardiaceae	g__unclassified_f__Pseudonocardiaceae	s__unclassified_f__Pseudonocardiaceae	ASV28385	2	1.6363e-6	0.03125
d__Bacteria	k__norank_d__Bacteria	p__Actinobacteriota	c__Actinobacteria	o__Pseudonocardiales	f__Pseudonocardiaceae	g__unclassified_f__Pseudonocardiaceae	s__unclassified_f__Pseudonocardiaceae	ASV29371	1	8.18148e-7	0.03125
d__Bacteria	k__norank_d__Bacteria	p__Actinobacteriota	c__Actinobacteria	o__Pseudonocardiales	f__Pseudonocardiaceae	g__unclassified_f__Pseudonocardiaceae	s__unclassified_f__Pseudonocardiaceae	ASV29446	9	7.36334e-6	0.03125
d__Bacteria	k__norank_d__Bacteria	p__Actinobacteriota	c__Actinobacteria	o__Pseudonocardiales	f__Pseudonocardiaceae	g__unclassified_f__Pseudonocardiaceae	s__unclassified_f__Pseudonocardiaceae	ASV29475	8	6.54519e-6	0.03125
d__Bacteria	k__norank_d__Bacteria	p__Actinobacteriota	c__Actinobacteria	o__Pseudonocardiales	f__Pseudonocardiaceae	g__unclassified_f__Pseudonocardiaceae	s__unclassified_f__Pseudonocardiaceae	ASV29523	5	4.09074e-6	0.03125
d__Bacteria	k__norank_d__Bacteria	p__Actinobacteriota	c__Actinobacteria	o__Pseudonocardiales	f__Pseudonocardiaceae	g__unclassified_f__Pseudonocardiaceae	s__unclassified_f__Pseudonocardiaceae	ASV29615	4	3.27259e-6	0.03125
d__Bacteria	k__norank_d__Bacteria	p__Actinobacteriota	c__Actinobacteria	o__Pseudonocardiales	f__Pseudonocardiaceae	g__unclassified_f__Pseudonocardiaceae	s__unclassified_f__Pseudonocardiaceae	ASV29776	3	2.45445e-6	0.03125
d__Bacteria	k__norank_d__Bacteria	p__Actinobacteriota	c__Actinobacteria	o__Pseudonocardiales	f__Pseudonocardiaceae	g__unclassified_f__Pseudonocardiaceae	s__unclassified_f__Pseudonocardiaceae	ASV29833	3	2.45445e-6	0.03125
d__Bacteria	k__norank_d__Bacteria	p__Actinobacteriota	c__Actinobacteria	o__Pseudonocardiales	f__Pseudonocardiaceae	g__unclassified_f__Pseudonocardiaceae	s__unclassified_f__Pseudonocardiaceae	ASV29948	2	1.6363e-6	0.03125
d__Bacteria	k__norank_d__Bacteria	p__Actinobacteriota	c__Actinobacteria	o__Pseudonocardiales	f__Pseudonocardiaceae	g__unclassified_f__Pseudonocardiaceae	s__unclassified_f__Pseudonocardiaceae	ASV29962	3	2.45445e-6	0.03125
d__Bacteria	k__norank_d__Bacteria	p__Actinobacteriota	c__Actinobacteria	o__Pseudonocardiales	f__Pseudonocardiaceae	g__unclassified_f__Pseudonocardiaceae	s__unclassified_f__Pseudonocardiaceae	ASV30071	2	1.6363e-6	0.03125
d__Bacteria	k__norank_d__Bacteria	p__Actinobacteriota	c__Actinobacteria	o__Pseudonocardiales	f__Pseudonocardiaceae	g__unclassified_f__Pseudonocardiaceae	s__unclassified_f__Pseudonocardiaceae	ASV3397	359	0.00029	0.09375
d__Bacteria	k__norank_d__Bacteria	p__Actinobacteriota	c__Actinobacteria	o__Pseudonocardiales	f__Pseudonocardiaceae	g__unclassified_f__Pseudonocardiaceae	s__unclassified_f__Pseudonocardiaceae	ASV3535	15	1.0E-5	0.0625
d__Bacteria	k__norank_d__Bacteria	p__Actinobacteriota	c__Actinobacteria	o__Pseudonocardiales	f__Pseudonocardiaceae	g__unclassified_f__Pseudonocardiaceae	s__unclassified_f__Pseudonocardiaceae	ASV413	142	0.00012	0.28125
d__Bacteria	k__norank_d__Bacteria	p__Actinobacteriota	c__Actinobacteria	o__Pseudonocardiales	f__Pseudonocardiaceae	g__unclassified_f__Pseudonocardiaceae	s__unclassified_f__Pseudonocardiaceae	ASV4431	7	5.72704e-6	0.03125
d__Bacteria	k__norank_d__Bacteria	p__Actinobacteriota	c__Actinobacteria	o__Pseudonocardiales	f__Pseudonocardiaceae	g__unclassified_f__Pseudonocardiaceae	s__unclassified_f__Pseudonocardiaceae	ASV4610	3	2.45445e-6	0.03125
d__Bacteria	k__norank_d__Bacteria	p__Actinobacteriota	c__Actinobacteria	o__Pseudonocardiales	f__Pseudonocardiaceae	g__unclassified_f__Pseudonocardiaceae	s__unclassified_f__Pseudonocardiaceae	ASV4621	4	3.27259e-6	0.03125
d__Bacteria	k__norank_d__Bacteria	p__Actinobacteriota	c__Actinobacteria	o__Pseudonocardiales	f__Pseudonocardiaceae	g__unclassified_f__Pseudonocardiaceae	s__unclassified_f__Pseudonocardiaceae	ASV4661	3	2.45445e-6	0.03125
d__Bacteria	k__norank_d__Bacteria	p__Actinobacteriota	c__Actinobacteria	o__Pseudonocardiales	f__Pseudonocardiaceae	g__unclassified_f__Pseudonocardiaceae	s__unclassified_f__Pseudonocardiaceae	ASV4774	2	1.6363e-6	0.03125
d__Bacteria	k__norank_d__Bacteria	p__Actinobacteriota	c__Actinobacteria	o__Pseudonocardiales	f__Pseudonocardiaceae	g__unclassified_f__Pseudonocardiaceae	s__unclassified_f__Pseudonocardiaceae	ASV4844	3	2.45445e-6	0.03125
d__Bacteria	k__norank_d__Bacteria	p__Actinobacteriota	c__Actinobacteria	o__Pseudonocardiales	f__Pseudonocardiaceae	g__unclassified_f__Pseudonocardiaceae	s__unclassified_f__Pseudonocardiaceae	ASV4919	2	1.6363e-6	0.03125
d__Bacteria	k__norank_d__Bacteria	p__Actinobacteriota	c__Actinobacteria	o__Pseudonocardiales	f__Pseudonocardiaceae	g__unclassified_f__Pseudonocardiaceae	s__unclassified_f__Pseudonocardiaceae	ASV5787	3	2.45445e-6	0.03125
d__Bacteria	k__norank_d__Bacteria	p__Actinobacteriota	c__Actinobacteria	o__Pseudonocardiales	f__Pseudonocardiaceae	g__unclassified_f__Pseudonocardiaceae	s__unclassified_f__Pseudonocardiaceae	ASV6717	2	1.6363e-6	0.03125
d__Bacteria	k__norank_d__Bacteria	p__Actinobacteriota	c__Actinobacteria	o__Pseudonocardiales	f__Pseudonocardiaceae	g__unclassified_f__Pseudonocardiaceae	s__unclassified_f__Pseudonocardiaceae	ASV724	13	1.0E-5	0.0625
d__Bacteria	k__norank_d__Bacteria	p__Actinobacteriota	c__Actinobacteria	o__Pseudonocardiales	f__Pseudonocardiaceae	g__unclassified_f__Pseudonocardiaceae	s__unclassified_f__Pseudonocardiaceae	ASV786	2	1.6363e-6	0.03125
d__Bacteria	k__norank_d__Bacteria	p__Actinobacteriota	c__Actinobacteria	o__Pseudonocardiales	f__Pseudonocardiaceae	g__unclassified_f__Pseudonocardiaceae	s__unclassified_f__Pseudonocardiaceae	ASV8796	5	4.09074e-6	0.03125
d__Bacteria	k__norank_d__Bacteria	p__Actinobacteriota	c__Actinobacteria	o__Pseudonocardiales	f__Pseudonocardiaceae	g__unclassified_f__Pseudonocardiaceae	s__unclassified_f__Pseudonocardiaceae	ASV8823	4	3.27259e-6	0.03125
d__Bacteria	k__norank_d__Bacteria	p__Actinobacteriota	c__Actinobacteria	o__Pseudonocardiales	f__Pseudonocardiaceae	g__unclassified_f__Pseudonocardiaceae	s__unclassified_f__Pseudonocardiaceae	ASV8827	6	4.90889e-6	0.03125
d__Bacteria	k__norank_d__Bacteria	p__Actinobacteriota	c__Actinobacteria	o__Pseudonocardiales	f__Pseudonocardiaceae	g__unclassified_f__Pseudonocardiaceae	s__unclassified_f__Pseudonocardiaceae	ASV8834	1	8.18148e-7	0.03125
d__Bacteria	k__norank_d__Bacteria	p__Actinobacteriota	c__Actinobacteria	o__Pseudonocardiales	f__Pseudonocardiaceae	g__unclassified_f__Pseudonocardiaceae	s__unclassified_f__Pseudonocardiaceae	ASV8950	2	1.6363e-6	0.03125
d__Bacteria	k__norank_d__Bacteria	p__Actinobacteriota	c__Actinobacteria	o__Streptomycetales	f__Streptomycetaceae	g__Kitasatospora	s__unclassified_g__Kitasatospora	ASV1626	22	2.0E-5	0.0625
d__Bacteria	k__norank_d__Bacteria	p__Actinobacteriota	c__Actinobacteria	o__Streptomycetales	f__Streptomycetaceae	g__Kitasatospora	s__unclassified_g__Kitasatospora	ASV1949	4	3.27259e-6	0.03125
d__Bacteria	k__norank_d__Bacteria	p__Actinobacteriota	c__Actinobacteria	o__Streptomycetales	f__Streptomycetaceae	g__Kitasatospora	s__unclassified_g__Kitasatospora	ASV20933	4	3.27259e-6	0.03125
d__Bacteria	k__norank_d__Bacteria	p__Actinobacteriota	c__Actinobacteria	o__Streptomycetales	f__Streptomycetaceae	g__Kitasatospora	s__unclassified_g__Kitasatospora	ASV20973	2	1.6363e-6	0.03125
d__Bacteria	k__norank_d__Bacteria	p__Actinobacteriota	c__Actinobacteria	o__Streptomycetales	f__Streptomycetaceae	g__Streptomyces	s__Streptomyces_burgazadensis	ASV529	9	7.36334e-6	0.0625
d__Bacteria	k__norank_d__Bacteria	p__Actinobacteriota	c__Actinobacteria	o__Streptomycetales	f__Streptomycetaceae	g__Streptomyces	s__unclassified_g__Streptomyces	ASV1229	1	8.18148e-7	0.03125
d__Bacteria	k__norank_d__Bacteria	p__Actinobacteriota	c__Actinobacteria	o__Streptomycetales	f__Streptomycetaceae	g__Streptomyces	s__unclassified_g__Streptomyces	ASV129	479	0.00039	0.1875
d__Bacteria	k__norank_d__Bacteria	p__Actinobacteriota	c__Actinobacteria	o__Streptomycetales	f__Streptomycetaceae	g__Streptomyces	s__unclassified_g__Streptomyces	ASV1376	646	0.00053	0.40625
d__Bacteria	k__norank_d__Bacteria	p__Actinobacteriota	c__Actinobacteria	o__Streptomycetales	f__Streptomycetaceae	g__Streptomyces	s__unclassified_g__Streptomyces	ASV138	157	0.00013	0.25
d__Bacteria	k__norank_d__Bacteria	p__Actinobacteriota	c__Actinobacteria	o__Streptomycetales	f__Streptomycetaceae	g__Streptomyces	s__unclassified_g__Streptomyces	ASV142	1020	0.00083	0.34375
d__Bacteria	k__norank_d__Bacteria	p__Actinobacteriota	c__Actinobacteria	o__Streptomycetales	f__Streptomycetaceae	g__Streptomyces	s__unclassified_g__Streptomyces	ASV1551	167	0.00014	0.0625
d__Bacteria	k__norank_d__Bacteria	p__Actinobacteriota	c__Actinobacteria	o__Streptomycetales	f__Streptomycetaceae	g__Streptomyces	s__unclassified_g__Streptomyces	ASV1649	17	1.0E-5	0.0625
d__Bacteria	k__norank_d__Bacteria	p__Actinobacteriota	c__Actinobacteria	o__Streptomycetales	f__Streptomycetaceae	g__Streptomyces	s__unclassified_g__Streptomyces	ASV175	216	0.00018	0.21875
d__Bacteria	k__norank_d__Bacteria	p__Actinobacteriota	c__Actinobacteria	o__Streptomycetales	f__Streptomycetaceae	g__Streptomyces	s__unclassified_g__Streptomyces	ASV20130	3	2.45445e-6	0.03125
d__Bacteria	k__norank_d__Bacteria	p__Actinobacteriota	c__Actinobacteria	o__Streptomycetales	f__Streptomycetaceae	g__Streptomyces	s__unclassified_g__Streptomyces	ASV20152	3	2.45445e-6	0.03125
d__Bacteria	k__norank_d__Bacteria	p__Actinobacteriota	c__Actinobacteria	o__Streptomycetales	f__Streptomycetaceae	g__Streptomyces	s__unclassified_g__Streptomyces	ASV20412	1	8.18148e-7	0.03125
d__Bacteria	k__norank_d__Bacteria	p__Actinobacteriota	c__Actinobacteria	o__Streptomycetales	f__Streptomycetaceae	g__Streptomyces	s__unclassified_g__Streptomyces	ASV20576	59	5.0E-5	0.03125
d__Bacteria	k__norank_d__Bacteria	p__Actinobacteriota	c__Actinobacteria	o__Streptomycetales	f__Streptomycetaceae	g__Streptomyces	s__unclassified_g__Streptomyces	ASV20685	9	7.36334e-6	0.03125
d__Bacteria	k__norank_d__Bacteria	p__Actinobacteriota	c__Actinobacteria	o__Streptomycetales	f__Streptomycetaceae	g__Streptomyces	s__unclassified_g__Streptomyces	ASV20814	4	3.27259e-6	0.03125
d__Bacteria	k__norank_d__Bacteria	p__Actinobacteriota	c__Actinobacteria	o__Streptomycetales	f__Streptomycetaceae	g__Streptomyces	s__unclassified_g__Streptomyces	ASV20848	3	2.45445e-6	0.03125
d__Bacteria	k__norank_d__Bacteria	p__Actinobacteriota	c__Actinobacteria	o__Streptomycetales	f__Streptomycetaceae	g__Streptomyces	s__unclassified_g__Streptomyces	ASV20880	3	2.45445e-6	0.03125
d__Bacteria	k__norank_d__Bacteria	p__Actinobacteriota	c__Actinobacteria	o__Streptomycetales	f__Streptomycetaceae	g__Streptomyces	s__unclassified_g__Streptomyces	ASV20895	3	2.45445e-6	0.03125
d__Bacteria	k__norank_d__Bacteria	p__Actinobacteriota	c__Actinobacteria	o__Streptomycetales	f__Streptomycetaceae	g__Streptomyces	s__unclassified_g__Streptomyces	ASV20988	1	8.18148e-7	0.03125
d__Bacteria	k__norank_d__Bacteria	p__Actinobacteriota	c__Actinobacteria	o__Streptomycetales	f__Streptomycetaceae	g__Streptomyces	s__unclassified_g__Streptomyces	ASV21221	44	4.0E-5	0.0625
d__Bacteria	k__norank_d__Bacteria	p__Actinobacteriota	c__Actinobacteria	o__Streptomycetales	f__Streptomycetaceae	g__Streptomyces	s__unclassified_g__Streptomyces	ASV21282	15	1.0E-5	0.03125
d__Bacteria	k__norank_d__Bacteria	p__Actinobacteriota	c__Actinobacteria	o__Streptomycetales	f__Streptomycetaceae	g__Streptomyces	s__unclassified_g__Streptomyces	ASV21323	9	7.36334e-6	0.03125
d__Bacteria	k__norank_d__Bacteria	p__Actinobacteriota	c__Actinobacteria	o__Streptomycetales	f__Streptomycetaceae	g__Streptomyces	s__unclassified_g__Streptomyces	ASV21471	2	1.6363e-6	0.03125
d__Bacteria	k__norank_d__Bacteria	p__Actinobacteriota	c__Actinobacteria	o__Streptomycetales	f__Streptomycetaceae	g__Streptomyces	s__unclassified_g__Streptomyces	ASV21516	4	3.27259e-6	0.03125
d__Bacteria	k__norank_d__Bacteria	p__Actinobacteriota	c__Actinobacteria	o__Streptomycetales	f__Streptomycetaceae	g__Streptomyces	s__unclassified_g__Streptomyces	ASV21543	5	4.09074e-6	0.03125
d__Bacteria	k__norank_d__Bacteria	p__Actinobacteriota	c__Actinobacteria	o__Streptomycetales	f__Streptomycetaceae	g__Streptomyces	s__unclassified_g__Streptomyces	ASV21567	4	3.27259e-6	0.03125
d__Bacteria	k__norank_d__Bacteria	p__Actinobacteriota	c__Actinobacteria	o__Streptomycetales	f__Streptomycetaceae	g__Streptomyces	s__unclassified_g__Streptomyces	ASV21604	2	1.6363e-6	0.03125
d__Bacteria	k__norank_d__Bacteria	p__Actinobacteriota	c__Actinobacteria	o__Streptomycetales	f__Streptomycetaceae	g__Streptomyces	s__unclassified_g__Streptomyces	ASV21650	2	1.6363e-6	0.03125
d__Bacteria	k__norank_d__Bacteria	p__Actinobacteriota	c__Actinobacteria	o__Streptomycetales	f__Streptomycetaceae	g__Streptomyces	s__unclassified_g__Streptomyces	ASV21685	3	2.45445e-6	0.03125
d__Bacteria	k__norank_d__Bacteria	p__Actinobacteriota	c__Actinobacteria	o__Streptomycetales	f__Streptomycetaceae	g__Streptomyces	s__unclassified_g__Streptomyces	ASV21725	2	1.6363e-6	0.03125
d__Bacteria	k__norank_d__Bacteria	p__Actinobacteriota	c__Actinobacteria	o__Streptomycetales	f__Streptomycetaceae	g__Streptomyces	s__unclassified_g__Streptomyces	ASV21785	2	1.6363e-6	0.03125
d__Bacteria	k__norank_d__Bacteria	p__Actinobacteriota	c__Actinobacteria	o__Streptomycetales	f__Streptomycetaceae	g__Streptomyces	s__unclassified_g__Streptomyces	ASV218	198	0.00016	0.28125
d__Bacteria	k__norank_d__Bacteria	p__Actinobacteriota	c__Actinobacteria	o__Streptomycetales	f__Streptomycetaceae	g__Streptomyces	s__unclassified_g__Streptomyces	ASV21838	1	8.18148e-7	0.03125
d__Bacteria	k__norank_d__Bacteria	p__Actinobacteriota	c__Actinobacteria	o__Streptomycetales	f__Streptomycetaceae	g__Streptomyces	s__unclassified_g__Streptomyces	ASV220	28	2.0E-5	0.03125
d__Bacteria	k__norank_d__Bacteria	p__Actinobacteriota	c__Actinobacteria	o__Streptomycetales	f__Streptomycetaceae	g__Streptomyces	s__unclassified_g__Streptomyces	ASV22298	10	8.18148e-6	0.03125
d__Bacteria	k__norank_d__Bacteria	p__Actinobacteriota	c__Actinobacteria	o__Streptomycetales	f__Streptomycetaceae	g__Streptomyces	s__unclassified_g__Streptomyces	ASV22313	10	8.18148e-6	0.03125
d__Bacteria	k__norank_d__Bacteria	p__Actinobacteriota	c__Actinobacteria	o__Streptomycetales	f__Streptomycetaceae	g__Streptomyces	s__unclassified_g__Streptomyces	ASV22409	5	4.09074e-6	0.03125
d__Bacteria	k__norank_d__Bacteria	p__Actinobacteriota	c__Actinobacteria	o__Streptomycetales	f__Streptomycetaceae	g__Streptomyces	s__unclassified_g__Streptomyces	ASV22532	4	3.27259e-6	0.03125
d__Bacteria	k__norank_d__Bacteria	p__Actinobacteriota	c__Actinobacteria	o__Streptomycetales	f__Streptomycetaceae	g__Streptomyces	s__unclassified_g__Streptomyces	ASV22541	6	4.90889e-6	0.03125
d__Bacteria	k__norank_d__Bacteria	p__Actinobacteriota	c__Actinobacteria	o__Streptomycetales	f__Streptomycetaceae	g__Streptomyces	s__unclassified_g__Streptomyces	ASV22722	1	8.18148e-7	0.03125
d__Bacteria	k__norank_d__Bacteria	p__Actinobacteriota	c__Actinobacteria	o__Streptomycetales	f__Streptomycetaceae	g__Streptomyces	s__unclassified_g__Streptomyces	ASV22796	3	2.45445e-6	0.03125
d__Bacteria	k__norank_d__Bacteria	p__Actinobacteriota	c__Actinobacteria	o__Streptomycetales	f__Streptomycetaceae	g__Streptomyces	s__unclassified_g__Streptomyces	ASV22868	1	8.18148e-7	0.03125
d__Bacteria	k__norank_d__Bacteria	p__Actinobacteriota	c__Actinobacteria	o__Streptomycetales	f__Streptomycetaceae	g__Streptomyces	s__unclassified_g__Streptomyces	ASV22885	2	1.6363e-6	0.03125
d__Bacteria	k__norank_d__Bacteria	p__Actinobacteriota	c__Actinobacteria	o__Streptomycetales	f__Streptomycetaceae	g__Streptomyces	s__unclassified_g__Streptomyces	ASV22908	2	1.6363e-6	0.03125
d__Bacteria	k__norank_d__Bacteria	p__Actinobacteriota	c__Actinobacteria	o__Streptomycetales	f__Streptomycetaceae	g__Streptomyces	s__unclassified_g__Streptomyces	ASV23181	95	8.0E-5	0.03125
d__Bacteria	k__norank_d__Bacteria	p__Actinobacteriota	c__Actinobacteria	o__Streptomycetales	f__Streptomycetaceae	g__Streptomyces	s__unclassified_g__Streptomyces	ASV23198	19	2.0E-5	0.03125
d__Bacteria	k__norank_d__Bacteria	p__Actinobacteriota	c__Actinobacteria	o__Streptomycetales	f__Streptomycetaceae	g__Streptomyces	s__unclassified_g__Streptomyces	ASV23200	23	2.0E-5	0.03125
d__Bacteria	k__norank_d__Bacteria	p__Actinobacteriota	c__Actinobacteria	o__Streptomycetales	f__Streptomycetaceae	g__Streptomyces	s__unclassified_g__Streptomyces	ASV23242	15	1.0E-5	0.03125
d__Bacteria	k__norank_d__Bacteria	p__Actinobacteriota	c__Actinobacteria	o__Streptomycetales	f__Streptomycetaceae	g__Streptomyces	s__unclassified_g__Streptomyces	ASV23265	13	1.0E-5	0.03125
d__Bacteria	k__norank_d__Bacteria	p__Actinobacteriota	c__Actinobacteria	o__Streptomycetales	f__Streptomycetaceae	g__Streptomyces	s__unclassified_g__Streptomyces	ASV23275	9	7.36334e-6	0.03125
d__Bacteria	k__norank_d__Bacteria	p__Actinobacteriota	c__Actinobacteria	o__Streptomycetales	f__Streptomycetaceae	g__Streptomyces	s__unclassified_g__Streptomyces	ASV23323	8	6.54519e-6	0.03125
d__Bacteria	k__norank_d__Bacteria	p__Actinobacteriota	c__Actinobacteria	o__Streptomycetales	f__Streptomycetaceae	g__Streptomyces	s__unclassified_g__Streptomyces	ASV23367	6	4.90889e-6	0.03125
d__Bacteria	k__norank_d__Bacteria	p__Actinobacteriota	c__Actinobacteria	o__Streptomycetales	f__Streptomycetaceae	g__Streptomyces	s__unclassified_g__Streptomyces	ASV23388	5	4.09074e-6	0.03125
d__Bacteria	k__norank_d__Bacteria	p__Actinobacteriota	c__Actinobacteria	o__Streptomycetales	f__Streptomycetaceae	g__Streptomyces	s__unclassified_g__Streptomyces	ASV23483	2	1.6363e-6	0.03125
d__Bacteria	k__norank_d__Bacteria	p__Actinobacteriota	c__Actinobacteria	o__Streptomycetales	f__Streptomycetaceae	g__Streptomyces	s__unclassified_g__Streptomyces	ASV23528	2	1.6363e-6	0.03125
d__Bacteria	k__norank_d__Bacteria	p__Actinobacteriota	c__Actinobacteria	o__Streptomycetales	f__Streptomycetaceae	g__Streptomyces	s__unclassified_g__Streptomyces	ASV23554	1	8.18148e-7	0.03125
d__Bacteria	k__norank_d__Bacteria	p__Actinobacteriota	c__Actinobacteria	o__Streptomycetales	f__Streptomycetaceae	g__Streptomyces	s__unclassified_g__Streptomyces	ASV23642	1	8.18148e-7	0.03125
d__Bacteria	k__norank_d__Bacteria	p__Actinobacteriota	c__Actinobacteria	o__Streptomycetales	f__Streptomycetaceae	g__Streptomyces	s__unclassified_g__Streptomyces	ASV2414	77	6.0E-5	0.0625
d__Bacteria	k__norank_d__Bacteria	p__Actinobacteriota	c__Actinobacteria	o__Streptomycetales	f__Streptomycetaceae	g__Streptomyces	s__unclassified_g__Streptomyces	ASV25801	5	4.09074e-6	0.03125
d__Bacteria	k__norank_d__Bacteria	p__Actinobacteriota	c__Actinobacteria	o__Streptomycetales	f__Streptomycetaceae	g__Streptomyces	s__unclassified_g__Streptomyces	ASV25916	1	8.18148e-7	0.03125
d__Bacteria	k__norank_d__Bacteria	p__Actinobacteriota	c__Actinobacteria	o__Streptomycetales	f__Streptomycetaceae	g__Streptomyces	s__unclassified_g__Streptomyces	ASV26093	3	2.45445e-6	0.03125
d__Bacteria	k__norank_d__Bacteria	p__Actinobacteriota	c__Actinobacteria	o__Streptomycetales	f__Streptomycetaceae	g__Streptomyces	s__unclassified_g__Streptomyces	ASV261	18	1.0E-5	0.03125
d__Bacteria	k__norank_d__Bacteria	p__Actinobacteriota	c__Actinobacteria	o__Streptomycetales	f__Streptomycetaceae	g__Streptomyces	s__unclassified_g__Streptomyces	ASV26161	4	3.27259e-6	0.03125
d__Bacteria	k__norank_d__Bacteria	p__Actinobacteriota	c__Actinobacteria	o__Streptomycetales	f__Streptomycetaceae	g__Streptomyces	s__unclassified_g__Streptomyces	ASV26435	27	2.0E-5	0.03125
d__Bacteria	k__norank_d__Bacteria	p__Actinobacteriota	c__Actinobacteria	o__Streptomycetales	f__Streptomycetaceae	g__Streptomyces	s__unclassified_g__Streptomyces	ASV26455	19	2.0E-5	0.03125
d__Bacteria	k__norank_d__Bacteria	p__Actinobacteriota	c__Actinobacteria	o__Streptomycetales	f__Streptomycetaceae	g__Streptomyces	s__unclassified_g__Streptomyces	ASV26510	8	6.54519e-6	0.03125
d__Bacteria	k__norank_d__Bacteria	p__Actinobacteriota	c__Actinobacteria	o__Streptomycetales	f__Streptomycetaceae	g__Streptomyces	s__unclassified_g__Streptomyces	ASV26724	4	3.27259e-6	0.03125
d__Bacteria	k__norank_d__Bacteria	p__Actinobacteriota	c__Actinobacteria	o__Streptomycetales	f__Streptomycetaceae	g__Streptomyces	s__unclassified_g__Streptomyces	ASV26737	2	1.6363e-6	0.03125
d__Bacteria	k__norank_d__Bacteria	p__Actinobacteriota	c__Actinobacteria	o__Streptomycetales	f__Streptomycetaceae	g__Streptomyces	s__unclassified_g__Streptomyces	ASV27112	2	1.6363e-6	0.03125
d__Bacteria	k__norank_d__Bacteria	p__Actinobacteriota	c__Actinobacteria	o__Streptomycetales	f__Streptomycetaceae	g__Streptomyces	s__unclassified_g__Streptomyces	ASV27197	1	8.18148e-7	0.03125
d__Bacteria	k__norank_d__Bacteria	p__Actinobacteriota	c__Actinobacteria	o__Streptomycetales	f__Streptomycetaceae	g__Streptomyces	s__unclassified_g__Streptomyces	ASV29586	7	5.72704e-6	0.03125
d__Bacteria	k__norank_d__Bacteria	p__Actinobacteriota	c__Actinobacteria	o__Streptomycetales	f__Streptomycetaceae	g__Streptomyces	s__unclassified_g__Streptomyces	ASV299	275	0.00022	0.25
d__Bacteria	k__norank_d__Bacteria	p__Actinobacteriota	c__Actinobacteria	o__Streptomycetales	f__Streptomycetaceae	g__Streptomyces	s__unclassified_g__Streptomyces	ASV3092	19	2.0E-5	0.03125
d__Bacteria	k__norank_d__Bacteria	p__Actinobacteriota	c__Actinobacteria	o__Streptomycetales	f__Streptomycetaceae	g__Streptomyces	s__unclassified_g__Streptomyces	ASV3142	20	2.0E-5	0.0625
d__Bacteria	k__norank_d__Bacteria	p__Actinobacteriota	c__Actinobacteria	o__Streptomycetales	f__Streptomycetaceae	g__Streptomyces	s__unclassified_g__Streptomyces	ASV3157	3	2.45445e-6	0.03125
d__Bacteria	k__norank_d__Bacteria	p__Actinobacteriota	c__Actinobacteria	o__Streptomycetales	f__Streptomycetaceae	g__Streptomyces	s__unclassified_g__Streptomyces	ASV32599	2	1.6363e-6	0.03125
d__Bacteria	k__norank_d__Bacteria	p__Actinobacteriota	c__Actinobacteria	o__Streptomycetales	f__Streptomycetaceae	g__Streptomyces	s__unclassified_g__Streptomyces	ASV4247	122	0.0001	0.09375
d__Bacteria	k__norank_d__Bacteria	p__Actinobacteriota	c__Actinobacteria	o__Streptomycetales	f__Streptomycetaceae	g__Streptomyces	s__unclassified_g__Streptomyces	ASV4527	7	5.72704e-6	0.03125
d__Bacteria	k__norank_d__Bacteria	p__Actinobacteriota	c__Actinobacteria	o__Streptomycetales	f__Streptomycetaceae	g__Streptomyces	s__unclassified_g__Streptomyces	ASV4725	3	2.45445e-6	0.03125
d__Bacteria	k__norank_d__Bacteria	p__Actinobacteriota	c__Actinobacteria	o__Streptomycetales	f__Streptomycetaceae	g__Streptomyces	s__unclassified_g__Streptomyces	ASV488	12	9.81778e-6	0.03125
d__Bacteria	k__norank_d__Bacteria	p__Actinobacteriota	c__Actinobacteria	o__Streptomycetales	f__Streptomycetaceae	g__Streptomyces	s__unclassified_g__Streptomyces	ASV5854	51	4.0E-5	0.03125
d__Bacteria	k__norank_d__Bacteria	p__Actinobacteriota	c__Actinobacteria	o__Streptomycetales	f__Streptomycetaceae	g__Streptomyces	s__unclassified_g__Streptomyces	ASV5923	14	1.0E-5	0.03125
d__Bacteria	k__norank_d__Bacteria	p__Actinobacteriota	c__Actinobacteria	o__Streptomycetales	f__Streptomycetaceae	g__Streptomyces	s__unclassified_g__Streptomyces	ASV5961	225	0.00018	0.21875
d__Bacteria	k__norank_d__Bacteria	p__Actinobacteriota	c__Actinobacteria	o__Streptomycetales	f__Streptomycetaceae	g__Streptomyces	s__unclassified_g__Streptomyces	ASV5977	8	6.54519e-6	0.03125
d__Bacteria	k__norank_d__Bacteria	p__Actinobacteriota	c__Actinobacteria	o__Streptomycetales	f__Streptomycetaceae	g__Streptomyces	s__unclassified_g__Streptomyces	ASV6044	7	5.72704e-6	0.03125
d__Bacteria	k__norank_d__Bacteria	p__Actinobacteriota	c__Actinobacteria	o__Streptomycetales	f__Streptomycetaceae	g__Streptomyces	s__unclassified_g__Streptomyces	ASV6122	5	4.09074e-6	0.03125
d__Bacteria	k__norank_d__Bacteria	p__Actinobacteriota	c__Actinobacteria	o__Streptomycetales	f__Streptomycetaceae	g__Streptomyces	s__unclassified_g__Streptomyces	ASV6151	4	3.27259e-6	0.03125
d__Bacteria	k__norank_d__Bacteria	p__Actinobacteriota	c__Actinobacteria	o__Streptomycetales	f__Streptomycetaceae	g__Streptomyces	s__unclassified_g__Streptomyces	ASV630	24	2.0E-5	0.0625
d__Bacteria	k__norank_d__Bacteria	p__Actinobacteriota	c__Actinobacteria	o__Streptomycetales	f__Streptomycetaceae	g__Streptomyces	s__unclassified_g__Streptomyces	ASV6328	2	1.6363e-6	0.03125
d__Bacteria	k__norank_d__Bacteria	p__Actinobacteriota	c__Actinobacteria	o__Streptomycetales	f__Streptomycetaceae	g__Streptomyces	s__unclassified_g__Streptomyces	ASV6330	3	2.45445e-6	0.03125
d__Bacteria	k__norank_d__Bacteria	p__Actinobacteriota	c__Actinobacteria	o__Streptomycetales	f__Streptomycetaceae	g__Streptomyces	s__unclassified_g__Streptomyces	ASV6557	125	0.0001	0.21875
d__Bacteria	k__norank_d__Bacteria	p__Actinobacteriota	c__Actinobacteria	o__Streptomycetales	f__Streptomycetaceae	g__Streptomyces	s__unclassified_g__Streptomyces	ASV6671	3	2.45445e-6	0.03125
d__Bacteria	k__norank_d__Bacteria	p__Actinobacteriota	c__Actinobacteria	o__Streptomycetales	f__Streptomycetaceae	g__Streptomyces	s__unclassified_g__Streptomyces	ASV6690	3	2.45445e-6	0.03125
d__Bacteria	k__norank_d__Bacteria	p__Actinobacteriota	c__Actinobacteria	o__Streptomycetales	f__Streptomycetaceae	g__Streptomyces	s__unclassified_g__Streptomyces	ASV6732	2	1.6363e-6	0.03125
d__Bacteria	k__norank_d__Bacteria	p__Actinobacteriota	c__Actinobacteria	o__Streptomycetales	f__Streptomycetaceae	g__Streptomyces	s__unclassified_g__Streptomyces	ASV6752	23	2.0E-5	0.0625
d__Bacteria	k__norank_d__Bacteria	p__Actinobacteriota	c__Actinobacteria	o__Streptomycetales	f__Streptomycetaceae	g__Streptomyces	s__unclassified_g__Streptomyces	ASV6781	131	0.00011	0.21875
d__Bacteria	k__norank_d__Bacteria	p__Actinobacteriota	c__Actinobacteria	o__Streptomycetales	f__Streptomycetaceae	g__Streptomyces	s__unclassified_g__Streptomyces	ASV6906	4	3.27259e-6	0.03125
d__Bacteria	k__norank_d__Bacteria	p__Actinobacteriota	c__Actinobacteria	o__Streptomycetales	f__Streptomycetaceae	g__Streptomyces	s__unclassified_g__Streptomyces	ASV6927	1	8.18148e-7	0.03125
d__Bacteria	k__norank_d__Bacteria	p__Actinobacteriota	c__Actinobacteria	o__Streptomycetales	f__Streptomycetaceae	g__Streptomyces	s__unclassified_g__Streptomyces	ASV6988	2	1.6363e-6	0.03125
d__Bacteria	k__norank_d__Bacteria	p__Actinobacteriota	c__Actinobacteria	o__Streptomycetales	f__Streptomycetaceae	g__Streptomyces	s__unclassified_g__Streptomyces	ASV7190	7	5.72704e-6	0.03125
d__Bacteria	k__norank_d__Bacteria	p__Actinobacteriota	c__Actinobacteria	o__Streptomycetales	f__Streptomycetaceae	g__Streptomyces	s__unclassified_g__Streptomyces	ASV7326	3	2.45445e-6	0.03125
d__Bacteria	k__norank_d__Bacteria	p__Actinobacteriota	c__Actinobacteria	o__Streptomycetales	f__Streptomycetaceae	g__Streptomyces	s__unclassified_g__Streptomyces	ASV741	18	1.0E-5	0.0625
d__Bacteria	k__norank_d__Bacteria	p__Actinobacteriota	c__Actinobacteria	o__Streptomycetales	f__Streptomycetaceae	g__Streptomyces	s__unclassified_g__Streptomyces	ASV7421	2	1.6363e-6	0.03125
d__Bacteria	k__norank_d__Bacteria	p__Actinobacteriota	c__Actinobacteria	o__Streptomycetales	f__Streptomycetaceae	g__Streptomyces	s__unclassified_g__Streptomyces	ASV7541	13	1.0E-5	0.03125
d__Bacteria	k__norank_d__Bacteria	p__Actinobacteriota	c__Actinobacteria	o__Streptomycetales	f__Streptomycetaceae	g__Streptomyces	s__unclassified_g__Streptomyces	ASV814	3	2.45445e-6	0.03125
d__Bacteria	k__norank_d__Bacteria	p__Actinobacteriota	c__Actinobacteria	o__Streptomycetales	f__Streptomycetaceae	g__Streptomyces	s__unclassified_g__Streptomyces	ASV8483	2	1.6363e-6	0.03125
d__Bacteria	k__norank_d__Bacteria	p__Actinobacteriota	c__Actinobacteria	o__Streptomycetales	f__Streptomycetaceae	g__Streptomyces	s__unclassified_g__Streptomyces	ASV8544	208	0.00017	0.0625
d__Bacteria	k__norank_d__Bacteria	p__Actinobacteriota	c__Actinobacteria	o__Streptomycetales	f__Streptomycetaceae	g__Streptomyces	s__unclassified_g__Streptomyces	ASV8556	55	4.0E-5	0.0625
d__Bacteria	k__norank_d__Bacteria	p__Actinobacteriota	c__Actinobacteria	o__Streptomycetales	f__Streptomycetaceae	g__Streptomyces	s__unclassified_g__Streptomyces	ASV8562	33	3.0E-5	0.03125
d__Bacteria	k__norank_d__Bacteria	p__Actinobacteriota	c__Actinobacteria	o__Streptomycetales	f__Streptomycetaceae	g__Streptomyces	s__unclassified_g__Streptomyces	ASV8714	9	7.36334e-6	0.03125
d__Bacteria	k__norank_d__Bacteria	p__Actinobacteriota	c__Actinobacteria	o__Streptomycetales	f__Streptomycetaceae	g__Streptomyces	s__unclassified_g__Streptomyces	ASV8744	7	5.72704e-6	0.03125
d__Bacteria	k__norank_d__Bacteria	p__Actinobacteriota	c__Actinobacteria	o__Streptomycetales	f__Streptomycetaceae	g__Streptomyces	s__unclassified_g__Streptomyces	ASV8766	6	4.90889e-6	0.03125
d__Bacteria	k__norank_d__Bacteria	p__Actinobacteriota	c__Actinobacteria	o__Streptomycetales	f__Streptomycetaceae	g__Streptomyces	s__unclassified_g__Streptomyces	ASV8812	6	4.90889e-6	0.03125
d__Bacteria	k__norank_d__Bacteria	p__Actinobacteriota	c__Actinobacteria	o__Streptomycetales	f__Streptomycetaceae	g__Streptomyces	s__unclassified_g__Streptomyces	ASV8851	4	3.27259e-6	0.03125
d__Bacteria	k__norank_d__Bacteria	p__Actinobacteriota	c__Actinobacteria	o__Streptomycetales	f__Streptomycetaceae	g__Streptomyces	s__unclassified_g__Streptomyces	ASV8872	5	4.09074e-6	0.03125
d__Bacteria	k__norank_d__Bacteria	p__Actinobacteriota	c__Actinobacteria	o__Streptomycetales	f__Streptomycetaceae	g__Streptomyces	s__unclassified_g__Streptomyces	ASV8973	3	2.45445e-6	0.03125
d__Bacteria	k__norank_d__Bacteria	p__Actinobacteriota	c__Actinobacteria	o__Streptomycetales	f__Streptomycetaceae	g__Streptomyces	s__unclassified_g__Streptomyces	ASV8986	1	8.18148e-7	0.03125
d__Bacteria	k__norank_d__Bacteria	p__Actinobacteriota	c__Actinobacteria	o__Streptomycetales	f__Streptomycetaceae	g__Streptomyces	s__unclassified_g__Streptomyces	ASV902	3	2.45445e-6	0.03125
d__Bacteria	k__norank_d__Bacteria	p__Actinobacteriota	c__Actinobacteria	o__Streptomycetales	f__Streptomycetaceae	g__Streptomyces	s__unclassified_g__Streptomyces	ASV9023	2	1.6363e-6	0.03125
d__Bacteria	k__norank_d__Bacteria	p__Actinobacteriota	c__Actinobacteria	o__Streptomycetales	f__Streptomycetaceae	g__Streptomyces	s__unclassified_g__Streptomyces	ASV9028	2	1.6363e-6	0.03125
d__Bacteria	k__norank_d__Bacteria	p__Actinobacteriota	c__Actinobacteria	o__Streptomycetales	f__Streptomycetaceae	g__Streptomyces	s__unclassified_g__Streptomyces	ASV9049	2	1.6363e-6	0.03125
d__Bacteria	k__norank_d__Bacteria	p__Actinobacteriota	c__Actinobacteria	o__Streptomycetales	f__Streptomycetaceae	g__unclassified_f__Streptomycetaceae	s__unclassified_f__Streptomycetaceae	ASV23351	5	4.09074e-6	0.03125
d__Bacteria	k__norank_d__Bacteria	p__Actinobacteriota	c__Actinobacteria	o__Streptosporangiales	f__Streptosporangiaceae	g__Microbispora	s__unclassified_g__Microbispora	ASV1430	3	2.45445e-6	0.03125
d__Bacteria	k__norank_d__Bacteria	p__Actinobacteriota	c__Actinobacteria	o__Streptosporangiales	f__Streptosporangiaceae	g__Nonomuraea	s__unclassified_g__Nonomuraea	ASV1334	11	8.99963e-6	0.0625
d__Bacteria	k__norank_d__Bacteria	p__Actinobacteriota	c__Actinobacteria	o__Streptosporangiales	f__Streptosporangiaceae	g__Nonomuraea	s__unclassified_g__Nonomuraea	ASV25960	16	1.0E-5	0.03125
d__Bacteria	k__norank_d__Bacteria	p__Actinobacteriota	c__Actinobacteria	o__Streptosporangiales	f__Streptosporangiaceae	g__Nonomuraea	s__unclassified_g__Nonomuraea	ASV26154	1	8.18148e-7	0.03125
d__Bacteria	k__norank_d__Bacteria	p__Actinobacteriota	c__Actinobacteria	o__Streptosporangiales	f__Streptosporangiaceae	g__Nonomuraea	s__unclassified_g__Nonomuraea	ASV26350	1	8.18148e-7	0.03125
d__Bacteria	k__norank_d__Bacteria	p__Actinobacteriota	c__Actinobacteria	o__Streptosporangiales	f__Streptosporangiaceae	g__Nonomuraea	s__unclassified_g__Nonomuraea	ASV26459	13	1.0E-5	0.03125
d__Bacteria	k__norank_d__Bacteria	p__Actinobacteriota	c__Actinobacteria	o__Streptosporangiales	f__Streptosporangiaceae	g__Nonomuraea	s__unclassified_g__Nonomuraea	ASV29406	19	2.0E-5	0.03125
d__Bacteria	k__norank_d__Bacteria	p__Actinobacteriota	c__Actinobacteria	o__Streptosporangiales	f__Streptosporangiaceae	g__Nonomuraea	s__unclassified_g__Nonomuraea	ASV29712	2	1.6363e-6	0.03125
d__Bacteria	k__norank_d__Bacteria	p__Actinobacteriota	c__Actinobacteria	o__Streptosporangiales	f__Streptosporangiaceae	g__Nonomuraea	s__unclassified_g__Nonomuraea	ASV8681	17	1.0E-5	0.0625
d__Bacteria	k__norank_d__Bacteria	p__Actinobacteriota	c__Actinobacteria	o__Streptosporangiales	f__Streptosporangiaceae	g__Nonomuraea	s__unclassified_g__Nonomuraea	ASV8877	8	6.54519e-6	0.0625
d__Bacteria	k__norank_d__Bacteria	p__Actinobacteriota	c__Actinobacteria	o__Streptosporangiales	f__Streptosporangiaceae	g__Sphaerimonospora	s__unclassified_g__Sphaerimonospora	ASV8663	229	0.00019	0.09375
d__Bacteria	k__norank_d__Bacteria	p__Actinobacteriota	c__Actinobacteria	o__Streptosporangiales	f__Streptosporangiaceae	g__Streptosporangium	s__unclassified_g__Streptosporangium	ASV20803	2	1.6363e-6	0.03125
d__Bacteria	k__norank_d__Bacteria	p__Actinobacteriota	c__Actinobacteria	o__Streptosporangiales	f__Streptosporangiaceae	g__Streptosporangium	s__unclassified_g__Streptosporangium	ASV20873	2	1.6363e-6	0.03125
d__Bacteria	k__norank_d__Bacteria	p__Actinobacteriota	c__Actinobacteria	o__Streptosporangiales	f__Streptosporangiaceae	g__Streptosporangium	s__unclassified_g__Streptosporangium	ASV25892	2	1.6363e-6	0.03125
d__Bacteria	k__norank_d__Bacteria	p__Actinobacteriota	c__Actinobacteria	o__Streptosporangiales	f__Streptosporangiaceae	g__Streptosporangium	s__unclassified_g__Streptosporangium	ASV3409	3	2.45445e-6	0.03125
d__Bacteria	k__norank_d__Bacteria	p__Actinobacteriota	c__Actinobacteria	o__Streptosporangiales	f__Streptosporangiaceae	g__Thermopolyspora	s__unclassified_g__Thermopolyspora	ASV7641	6	4.90889e-6	0.03125
d__Bacteria	k__norank_d__Bacteria	p__Actinobacteriota	c__Actinobacteria	o__Streptosporangiales	f__Streptosporangiaceae	g__Thermopolyspora	s__uncultured_compost_bacterium_g__Thermopolyspora	ASV20414	1	8.18148e-7	0.03125
d__Bacteria	k__norank_d__Bacteria	p__Actinobacteriota	c__Actinobacteria	o__Streptosporangiales	f__Streptosporangiaceae	g__unclassified_f__Streptosporangiaceae	s__unclassified_f__Streptosporangiaceae	ASV21059	1	8.18148e-7	0.03125
d__Bacteria	k__norank_d__Bacteria	p__Actinobacteriota	c__Actinobacteria	o__Streptosporangiales	f__Streptosporangiaceae	g__unclassified_f__Streptosporangiaceae	s__unclassified_f__Streptosporangiaceae	ASV26308	2	1.6363e-6	0.03125
d__Bacteria	k__norank_d__Bacteria	p__Actinobacteriota	c__Actinobacteria	o__Streptosporangiales	f__Streptosporangiaceae	g__unclassified_f__Streptosporangiaceae	s__unclassified_f__Streptosporangiaceae	ASV26691	6	4.90889e-6	0.03125
d__Bacteria	k__norank_d__Bacteria	p__Actinobacteriota	c__Actinobacteria	o__Streptosporangiales	f__Streptosporangiaceae	g__unclassified_f__Streptosporangiaceae	s__unclassified_f__Streptosporangiaceae	ASV3193	161	0.00013	0.125
d__Bacteria	k__norank_d__Bacteria	p__Actinobacteriota	c__Actinobacteria	o__Streptosporangiales	f__Streptosporangiaceae	g__unclassified_f__Streptosporangiaceae	s__unclassified_f__Streptosporangiaceae	ASV462	20	2.0E-5	0.0625
d__Bacteria	k__norank_d__Bacteria	p__Actinobacteriota	c__Actinobacteria	o__Streptosporangiales	f__Streptosporangiaceae	g__unclassified_f__Streptosporangiaceae	s__unclassified_f__Streptosporangiaceae	ASV4702	4	3.27259e-6	0.03125
d__Bacteria	k__norank_d__Bacteria	p__Actinobacteriota	c__Actinobacteria	o__Streptosporangiales	f__Streptosporangiaceae	g__unclassified_f__Streptosporangiaceae	s__unclassified_f__Streptosporangiaceae	ASV555	10	8.18148e-6	0.03125
d__Bacteria	k__norank_d__Bacteria	p__Actinobacteriota	c__Actinobacteria	o__Streptosporangiales	f__Thermomonosporaceae	g__Actinoallomurus	s__unclassified_g__Actinoallomurus	ASV174	38	3.0E-5	0.03125
d__Bacteria	k__norank_d__Bacteria	p__Actinobacteriota	c__Actinobacteria	o__Streptosporangiales	f__Thermomonosporaceae	g__Actinoallomurus	s__unclassified_g__Actinoallomurus	ASV20571	249	0.0002	0.03125
d__Bacteria	k__norank_d__Bacteria	p__Actinobacteriota	c__Actinobacteria	o__Streptosporangiales	f__Thermomonosporaceae	g__Actinoallomurus	s__unclassified_g__Actinoallomurus	ASV20825	4	3.27259e-6	0.03125
d__Bacteria	k__norank_d__Bacteria	p__Actinobacteriota	c__Actinobacteria	o__Streptosporangiales	f__Thermomonosporaceae	g__Actinoallomurus	s__unclassified_g__Actinoallomurus	ASV22191	42	3.0E-5	0.03125
d__Bacteria	k__norank_d__Bacteria	p__Actinobacteriota	c__Actinobacteria	o__Streptosporangiales	f__Thermomonosporaceae	g__Actinoallomurus	s__unclassified_g__Actinoallomurus	ASV26659	5	4.09074e-6	0.03125
d__Bacteria	k__norank_d__Bacteria	p__Actinobacteriota	c__Actinobacteria	o__Streptosporangiales	f__Thermomonosporaceae	g__Actinoallomurus	s__unclassified_g__Actinoallomurus	ASV3099	10	8.18148e-6	0.03125
d__Bacteria	k__norank_d__Bacteria	p__Actinobacteriota	c__Actinobacteria	o__Streptosporangiales	f__Thermomonosporaceae	g__Actinoallomurus	s__unclassified_g__Actinoallomurus	ASV3136	161	0.00013	0.28125
d__Bacteria	k__norank_d__Bacteria	p__Actinobacteriota	c__Actinobacteria	o__Streptosporangiales	f__Thermomonosporaceae	g__Actinoallomurus	s__unclassified_g__Actinoallomurus	ASV4418	8	6.54519e-6	0.03125
d__Bacteria	k__norank_d__Bacteria	p__Actinobacteriota	c__Actinobacteria	o__Streptosporangiales	f__Thermomonosporaceae	g__Actinoallomurus	s__unclassified_g__Actinoallomurus	ASV7108	11	8.99963e-6	0.03125
d__Bacteria	k__norank_d__Bacteria	p__Actinobacteriota	c__Actinobacteria	o__Streptosporangiales	f__Thermomonosporaceae	g__Actinoallomurus	s__unclassified_g__Actinoallomurus	ASV7423	2	1.6363e-6	0.03125
d__Bacteria	k__norank_d__Bacteria	p__Actinobacteriota	c__Actinobacteria	o__Streptosporangiales	f__Thermomonosporaceae	g__Actinocorallia	s__metagenome_g__Actinocorallia	ASV7146	9	7.36334e-6	0.03125
d__Bacteria	k__norank_d__Bacteria	p__Actinobacteriota	c__Actinobacteria	o__Streptosporangiales	f__Thermomonosporaceae	g__Actinocorallia	s__unclassified_g__Actinocorallia	ASV1100	3	2.45445e-6	0.03125
d__Bacteria	k__norank_d__Bacteria	p__Actinobacteriota	c__Actinobacteria	o__Streptosporangiales	f__Thermomonosporaceae	g__Actinocorallia	s__unclassified_g__Actinocorallia	ASV1362	117	0.0001	0.28125
d__Bacteria	k__norank_d__Bacteria	p__Actinobacteriota	c__Actinobacteria	o__Streptosporangiales	f__Thermomonosporaceae	g__Actinocorallia	s__unclassified_g__Actinocorallia	ASV20589	27	2.0E-5	0.03125
d__Bacteria	k__norank_d__Bacteria	p__Actinobacteriota	c__Actinobacteria	o__Streptosporangiales	f__Thermomonosporaceae	g__Actinocorallia	s__unclassified_g__Actinocorallia	ASV26470	9	7.36334e-6	0.03125
d__Bacteria	k__norank_d__Bacteria	p__Actinobacteriota	c__Actinobacteria	o__Streptosporangiales	f__Thermomonosporaceae	g__Actinocorallia	s__unclassified_g__Actinocorallia	ASV29445	12	9.81778e-6	0.03125
d__Bacteria	k__norank_d__Bacteria	p__Actinobacteriota	c__Actinobacteria	o__Streptosporangiales	f__Thermomonosporaceae	g__Actinocorallia	s__unclassified_g__Actinocorallia	ASV6574	15	1.0E-5	0.03125
d__Bacteria	k__norank_d__Bacteria	p__Actinobacteriota	c__Actinobacteria	o__Streptosporangiales	f__Thermomonosporaceae	g__Actinomadura	s__Actinomadura_chibensis	ASV27719	32	3.0E-5	0.03125
d__Bacteria	k__norank_d__Bacteria	p__Actinobacteriota	c__Actinobacteria	o__Streptosporangiales	f__Thermomonosporaceae	g__Actinomadura	s__unclassified_g__Actinomadura	ASV100	63	5.0E-5	0.03125
d__Bacteria	k__norank_d__Bacteria	p__Actinobacteriota	c__Actinobacteria	o__Streptosporangiales	f__Thermomonosporaceae	g__Actinomadura	s__unclassified_g__Actinomadura	ASV20373	2	1.6363e-6	0.03125
d__Bacteria	k__norank_d__Bacteria	p__Actinobacteriota	c__Actinobacteria	o__Streptosporangiales	f__Thermomonosporaceae	g__Actinomadura	s__unclassified_g__Actinomadura	ASV20801	6	4.90889e-6	0.03125
d__Bacteria	k__norank_d__Bacteria	p__Actinobacteriota	c__Actinobacteria	o__Streptosporangiales	f__Thermomonosporaceae	g__Actinomadura	s__unclassified_g__Actinomadura	ASV20864	3	2.45445e-6	0.03125
d__Bacteria	k__norank_d__Bacteria	p__Actinobacteriota	c__Actinobacteria	o__Streptosporangiales	f__Thermomonosporaceae	g__Actinomadura	s__unclassified_g__Actinomadura	ASV21209	30	2.0E-5	0.0625
d__Bacteria	k__norank_d__Bacteria	p__Actinobacteriota	c__Actinobacteria	o__Streptosporangiales	f__Thermomonosporaceae	g__Actinomadura	s__unclassified_g__Actinomadura	ASV21275	13	1.0E-5	0.03125
d__Bacteria	k__norank_d__Bacteria	p__Actinobacteriota	c__Actinobacteria	o__Streptosporangiales	f__Thermomonosporaceae	g__Actinomadura	s__unclassified_g__Actinomadura	ASV21368	10	8.18148e-6	0.03125
[truncated: 15,468 more rows]

## Sheet: Table S2
valid sequence listing
Sample_info	ASV_num	Seq_num
ZS11_P1	1189	38196
ZS11_P3	1729	38196
ZS11_P2	916	38196
[truncated: 29 more rows]

## Sheet: Table S3
Primers used in this study
[truncated: 29 more rows]
