# Supplementary material
Source: Research Square preprint supplement (doi:10.21203/rs.3.rs-9380607/v1)

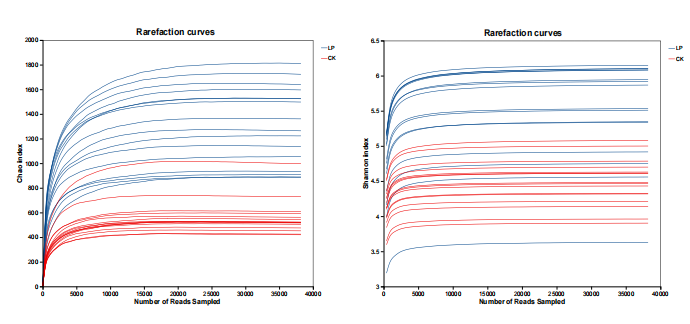


**Fig. S1** Rarefaction curves of Chao and Shannon index.

Supplement: Supplementary file 1 [file a39c0d08bab93bdec38edb73.docx]
